# Supplementary material for: A Genome-Wide Gene-Based Gene–Environment Interaction Study of Breast Cancer in More than 90,000 Women
Source: Cancer Res Commun. 2022 Apr 8;2(4):211–9. doi: 10.1158/2767-9764.CRC-21-0119 (PMC9604427; doi:10.1158/2767-9764.CRC-21-0119)
Supplement: Supplementary Tables 1-3 — Supplementary Table 1. Sample Size of each participated study, by case-control status and genotype platform. Supplementary Table 2. Association between fourteen environmental factors and the risk of breast cancer. Supplementary Table 3. Interactions between genes and fourteen environmental factors. [file crc-21-0119-s02.xlsx]

## Sheet: Table of Contents
	Supplementary Table 1. Sample Size of each participated study, by case-control status and genotype platform
	Supplementary Table 2. Association between fourteen environmental factors and the risk of breast cancer
	Supplementary Table 3. Interactions between genes and fourteen environmental factors
		Table 3.1	Age at Menarche, by 2 years old
		Table 3.2	Age at First Fullterm Pregnancy, by 5 years old
		Table 3.3	Alcohol Consumption, Lifetime, by 10 grams per day
		Table 3.4	Body Mass Index, Premenopausal, kg/m2
		Table 3.5	Boday Mass Index, Postmenopausal, kg/m2
		Table 3.6	Ever Breastfed
		Table 3.7	Duration of Breastfeeding, by 12 Months
		Table 3.8	Current Use of Menopausal Hormone Therapy, Estrogen Only
		Table 3.9	Current Use of Menopausal Hormone Therapy, Estrogen + Progestogen
		Table 3.10	Adult Height, by 5 cm
		Table 3.11	Ever Use of Oral Contraceptives
		Table 3.12	Parous
		Table 3.13	Number of Full-term Births
		Table 3.14	Current Smoking Status

## Sheet: SupplTable1
				Number of Controls			Number of Cases			Total Sample Size
	Abbreviation	Full Name	Country	OncoArray	iCOGs	Total	OncoArray	iCOGs	Total	OncoArray	iCOGs	Total
	ABCFS	Australian Breast Cancer Family Study	Australia	187	528	715	995	760	1755	1182	1288	2470
	AHS	Agricultural Health Study	USA	1137	0	1137	514	0	514	1651	0	1651
	BCEES	Breast Cancer Employment and Environment Study	Australia	834	0	834	783	0	783	1617	0	1617
	BCINIS	Breast Cancer in Northern Israel Study	Isarel	724	0	724	1414	0	1414	2138	0	2138
	CBCS	Canadian Breast Cancer Study	Canada	817	0	817	676	0	676	1493	0	1493
	CECILE	CECILE Breast Cancer Study	France	159	999	1158	306	1019	1325	465	2018	2483
	CPSII	Cancer Prevention Study-II Nutrition Cohort	USA	3028	2178	5206	3051	2166	5217	6079	4344	10423
	CTS	California Teachers Study	USA	610	0	610	1156	0	1156	1766	0	1766
	EPIC	European Prospective Investigation Into Cancer and Nutrition	European	3597	0	3597	3847	0	3847	7444	0	7444
	ESTHER	ESTHER Breast Cancer Study	Germany	187	497	684	296	467	763	483	964	1447
	GENICA	Gene Environment Interaction and Breast Cancer in Germany	Germany	284	418	702	460	458	918	744	876	1620
	GESBC	Genetic Epidemiology Study of Breast Cancer by Age 50	Germany	181	0	181	358	0	358	539	0	539
	KARMA	Karolinska Mammography Project for Risk Prediction of Breast Cancer	Sweden	5981	0	5981	1640	0	1640	7621	0	7621
	KBCP	Kuopio Breast Cancer Project	Finland	245	240	485	556	428	984	801	668	1469
	MARIE	Mammary Carcinoma Risk Factor Investigation	Germany	289	1454	1743	512	1459	1971	801	2913	3714
	MCCS	Melbourne Collaborative Cohort Study	Australia	978	494	1472	1044	561	1605	2022	1055	3077
	MEC	Multiethnic Cohort	USA	724	477	1201	673	466	1139	1397	943	2340
	MISS	Melanoma Inquiry of Southern Sweden	Sweden	1529	0	1529	701	0	701	2230	0	2230
	MMHS	Mayo Mammography Health Study	USA	1635	0	1635	384	0	384	2019	0	2019
	MTLGEBCS	Montreal Gene-Environment Breast Cancer Study	Canada	170	436	606	341	489	830	511	925	1436
	NBHS	Nashville Breast Health Study	USA	652	62	714	674	62	736	1326	124	1450
	NCBCS	North Carolina Breast Cancer Study	USA	1006	0	1006	2389	0	2389	3395	0	3395
	NHS	Nurses' Health Study	USA	1804	0	1804	1590	0	1590	3394	0	3394
	NHS2	Nurses' Health Study 2	USA	1905	0	1905	1607	0	1607	3512	0	3512
	PBCS	NCI Polish Breast Cancer Study	Poland	2045	424	2469	1931	519	2450	3976	943	4919
	PLCO	The Prostate,Lung,Colorectal and Ovarian (PLCO) Cancer Screening Trial	USA	2595	0	2595	2305	0	2305	4900	0	4900
	PROCAS	Predicting the Risk Of Cancer At Screening Study	UK	1655	0	1655	461	0	461	2116	0	2116
	SASBAC	Singapore and Sweden Breast Cancer Study	Sweden	0	1378	1378	0	1163	1163	0	2541	2541
	SISTER	The Sister Study	USA	1556	0	1556	2008	0	2008	3564	0	3564
	SMC	Swedish Mammography Cohort	Sweden	661	0	661	1349	0	1349	2010	0	2010
	UKBGS	UK Breakthrough Generations Study	UK	705	464	1169	1540	482	2022	2245	946	3191
	Total			37880	10049	47929	35561	10499	46060	73441	20548	93989

## Sheet: SupplTable2
	Environmental Factor	Sample Size	Odds ratio	95% Confidence Interval	P-value
	Age at menarche, per 2-year	88651	0.94	0.93 - 0.96	< 0.001
	Age at first full-term pregnancy, per 5-year	74457	1.12	1.10 - 1.14	< 0.001
	Lifetime alcohol consumption, per 10 g/day	43990	1.06	1.04 - 1.08	< 0.001
	Postmenopausal BMI, per 5 kg/m2	64249	1.04	1.03 - 1.06	< 0.001
	Premenopausal BMI, per 5 kg/m2	23360	0.92	0.90 - 0.95	< 0.001
	Ever breastfed	48696	0.95	0.91 - 1.00	0.03
	Duration of breastfeeding, per 12-month	39278	0.97	0.95 - 0.99	0.004
	Current use of estrogen only (E-only) MHT	34074	0.91	0.86 - 0.97	0.002
	Current use of estrogen+progestogen (E+P) MHT	34032	1.59	1.49 - 1.69	< 0.001
	Adult height, per 5 cm	86892	1.06	1.05 - 1.07	< 0.001
	Ever use of oral contraceptive	84628	1.01	0.98 - 1.04	0.53							s
	Number of full-term births	77092	0.9	0.89 - 0.92	< 0.001
	Parity	89236	0.84	0.80 - 0.87	< 0.001
	Current smoking status	81144	1.03	0.99 - 1.08	0.14
	*The logistic regression models generating odds ratio and 95% confidence interval were all adjusted for study only;
	For the analysis of current E-only use, analysis was limited to postmenopausal women only and the model was further adjusted for former E-only MHT use.
	For the analysis of current E+P use, analysis was limited to postmenopausal women only and the model was further adjusted for former E+P MHT use.
	For the analysis of current smoking status, the model was further adjusted for former smoking status

## Sheet: SupplTable3.1
	Supplementary Table 3.1 Interactions between genes and age at Menarche (by 2 years old)
						P-values
	Gene Name	Chromosome	Start	End	# of SNPs	Fixed effect	Random Effect	Adaptive Weighted	FDR-Corrected Adaptive Weighted
	RP11-219D15.3	3	139067866	139068169	424	5.50752e-06	0.106609	1.59883e-05	0.0777671
	B3GNT1	11	66112843	66115163	306	0.000260301	0.848209	0.00130626	0.529471
	CTC-484P3.1	5	94161666	94162399	409	0.00262368	0.028921	0.000892313	0.529471
	NMNAT3	3	139279022	139396859	525	0.004841	0.00214036	0.000707136	0.529471
	PRR4	12	10977559	11324212	358	0.0105395	0.0158028	0.00083613	0.529471
	TAS2R15	12	11117024	11117951	384	0.00172957	0.0472626	0.000937764	0.529471
	TAS2R64P	12	11229368	11231770	389	0.0335045	0.0083435	0.00127495	0.529471
	ZNF112	19	44830708	44871377	449	0.14899	0.000342376	0.000842727	0.529471
	ZNF229	19	44921685	44952766	452	0.0530271	0.00115465	0.00123992	0.529471
	ZNF234	19	44645710	44663156	493	0.395888	0.000516551	0.00125393	0.529471
	ZNF285	19	44886459	44905774	461	0.332832	0.000157573	0.000394519	0.529471
	ZNF285B	19	44971858	44977444	452	0.0936985	0.000450603	0.000982243	0.529471
	WDR55	5	140044261	140052757	348	0.00281817	0.0340392	0.0015603	0.555145
	ZNF223	19	44555520	44572144	515	0.00236002	0.033079	0.00159787	0.555145
	ANO4	12	101111304	101522419	483	0.00136445	0.525897	0.00485294	0.605248
	CCDC40	17	78010435	78074412	405	0.0162494	0.0294796	0.00473962	0.605248
	DEFB124	20	30053309	30060841	225	0.094366	0.0118753	0.00358796	0.605248
	EXOC4	7	132937829	133751342	292	0.887625	0.000724307	0.00319882	0.605248
	FANCG	9	35073832	35080013	343	0.270244	0.00134775	0.00475093	0.605248
	FRS3	6	41737914	41747638	509	0.00464891	0.0782618	0.00456863	0.605248
	HMG20A	15	77712754	77777949	326	0.0447037	0.00658971	0.00455672	0.605248
	MED20	6	41873092	41888877	477	0.00875948	0.0369271	0.00479161	0.605248
	MRPL42	12	93861264	93897545	456	0.0314948	0.027556	0.00428155	0.605248
	PHF10	6	170110332	170124151	489	0.00852385	0.0273174	0.00393438	0.605248
	PRG2	11	57154267	57158130	381	0.000657684	0.733025	0.00316627	0.605248
	RP11-15A1.3	19	44395956	44405957	466	0.210738	0.00157443	0.00438808	0.605248
	RP11-263K4.3	12	82906456	82909596	367	0.706619	0.000883767	0.00398328	0.605248
	RP11-797A18.6	15	77359996	77360667	251	0.0011753	0.710211	0.0043009	0.605248
	RP5-1043L13.1	20	58662895	59102516	602	0.729336	0.00124665	0.00433834	0.605248
	SNX27	1	151584876	151671567	335	0.0122718	0.0195106	0.00197795	0.605248
	TAPT1-AS1	4	16228286	16321763	604	0.778847	0.00111755	0.004163	0.605248
	TAS2R10	12	10977916	10978957	390	0.85003	0.00066438	0.00328457	0.605248
	TAS2R14	12	11090005	11091862	370	0.0203068	0.00775425	0.00331211	0.605248
	TAS2R20	12	11149094	11150474	385	0.0116116	0.0170655	0.00216803	0.605248
	TAS2R31	12	11182986	11184006	393	0.0311015	0.0106358	0.00234984	0.605248
	TAS2R43	12	11243886	11244912	386	0.0247153	0.00444842	0.00369557	0.605248
	TTC28-AS1	22	28315364	28404569	525	0.00170719	0.177143	0.00456446	0.605248
	ZNF155	19	44472014	44501047	483	0.733957	0.000638674	0.00277508	0.605248
	ZNF343	20	2462463	2505348	590	0.00434418	0.0912789	0.00311663	0.605248
	SLC15A5	12	16341419	16430619	390	0.643294	0.00146498	0.00522267	0.635077
	RP11-114H24.2	15	78206559	78219188	431	0.607446	0.00124726	0.00536488	0.636458
	NPTX2	7	98246609	98259180	352	0.853498	0.00221315	0.00561776	0.65059
	AKR7A3	1	19609052	19615744	495	0.00196142	0.534808	0.0061103	0.651342
	FAM85B	8	8025341	8084136	320	0.00840655	0.0727757	0.00623523	0.651342
	IPO8	12	30781922	30848920	579	0.0126762	0.0209219	0.0062938	0.651342
	MDN1	6	90352218	90529442	437	0.00177145	0.511823	0.00584189	0.651342
	ZNF404	19	44376515	44388203	461	0.117268	0.00289688	0.00608548	0.651342
	MEX3C	18	48700920	48744674	409	0.0280752	0.0137903	0.00667345	0.676243
	SMAD4	18	48554764	48611415	431	0.0171763	0.0121975	0.00725857	0.706114
	TAS2R12	12	11047542	11048481	368	0.07736	0.00815328	0.00719176	0.706114
	VTI1B	14	68113792	68141548	362	0.726841	0.0037599	0.00756803	0.721782
	MSH6	2	47922669	48037240	362	0.0127045	0.126133	0.00803332	0.723594
	PPT1	1	40538379	40563375	420	0.0019443	0.600429	0.00788763	0.723594
	PRIMPOL	4	185570767	185615771	576	0.002124	0.902075	0.00782373	0.723594
	XXyac-YX65C7_A.2	6	169613349	169639660	620	0.0620618	0.0240841	0.00821985	0.726934
	EVL	14	100437786	100610573	416	0.00540935	0.343484	0.00841847	0.731204
	CYP2J2	1	60358980	60392462	410	0.0186248	0.243337	0.00934836	0.797727
	KCNV2	9	2717502	2730037	718	0.00755368	0.247255	0.0098773	0.80072
	POGZ	1	151375200	151431941	348	0.0718977	0.00594588	0.00972306	0.80072
	TMCO6	5	140019012	140024869	344	0.134957	0.0135778	0.00960275	0.80072
	DOCK4	7	111366166	111846466	430	0.00311974	0.317507	0.0101047	0.805723
	RP11-98D18.9	1	151763280	151766878	340	0.320505	0.00299944	0.010326	0.810095
	EIF4EBP3	5	139927251	139929163	328	0.0365458	0.0536703	0.0113594	0.863313
	TRIM7	5	180620924	180632293	211	0.0339775	0.0151916	0.0113221	0.863313
	SIRPB1	20	1544167	1600707	626	0.23778	0.00739041	0.011899	0.890412
	CAPNS1	19	36630477	36641255	334	0.00306208	0.688634	0.012295	0.906103
	CAST	5	95860971	96115299	465	0.478421	0.00356757	0.0137304	0.915792
	CYP7A1	8	59402737	59412795	525	0.00420274	0.515284	0.0129086	0.915792
	LINC00323	21	42513427	42520060	585	0.688762	0.00314035	0.0137129	0.915792
	RP11-49K24.8	18	44632317	44633773	539	0.489287	0.00404235	0.013226	0.915792
	RP5-901A4.1	11	67792277	67797928	271	0.0447348	0.0334993	0.0137444	0.915792
	TRPC2	11	3631131	3658789	390	0.00288731	0.865694	0.0130832	0.915792
	ZNF322	6	26636518	26659980	441	0.00568075	0.511604	0.0130731	0.915792
	C10orf107	10	63422719	63526524	427	0.607093	0.00330234	0.0139864	0.91932
	BACE2	21	42539728	42654445	583	0.632703	0.00445036	0.0178075	0.933399
	COPG2	7	130146134	130353487	420	0.618792	0.00390402	0.0147087	0.933399
	CTC-338M12.1	5	180632361	180633120	211	0.0962629	0.0112666	0.0164895	0.933399
	CTD-2085J24.4	19	33366831	33369327	423	0.554449	0.00704564	0.0183914	0.933399
	EFEMP2	11	65633912	65641063	351	0.795645	0.00405362	0.0183666	0.933399
	EPS8	12	15773092	16035263	397	0.0136085	0.116193	0.0145509	0.933399
	FGFBP2	4	15961866	15964859	574	0.310921	0.00694777	0.0152682	0.933399
	FIBP	11	65651392	65656010	348	0.838392	0.00385653	0.0176438	0.933399
	GSTP1	11	67351066	67354131	258	0.00474973	0.312171	0.0154629	0.933399
	IK	5	140026643	140042063	346	0.0629129	0.0145779	0.0154023	0.933399
	LIAS	4	39460620	39479273	375	0.00912229	0.227582	0.0175391	0.933399
	NDUFV1	11	67374323	67380006	261	0.00491222	0.370427	0.0170697	0.933399
	NUDT19	19	33182867	33204702	404	0.0172409	0.0796244	0.0188219	0.933399
	PINLYP	19	44081344	44086256	393	0.562845	0.00641387	0.0169614	0.933399
	PRICKLE4	6	41748087	41755399	508	0.284235	0.00798263	0.0163931	0.933399
	RALGDS	9	135973107	136024721	575	0.00932984	0.181832	0.018911	0.933399
	RP11-195F19.9	9	34678097	34681295	365	0.911416	0.00401683	0.0187634	0.933399
	RP11-755F10.3	11	66027038	66027313	325	0.00378044	0.80763	0.0170411	0.933399
	RP11-819C21.1	11	107182858	107186997	475	0.0759083	0.0480698	0.0164388	0.933399
	RPP25L	9	34610483	34612101	360	0.106804	0.0388657	0.0187919	0.933399
	RPSA	3	39448180	39454033	427	0.0156843	0.418419	0.0183307	0.933399
	RRP15	1	218458629	218511325	477	0.269644	0.0101634	0.0189981	0.933399
	TMC2	20	2517253	2622430	598	0.464224	0.00468341	0.017903	0.933399
	TRIM16L	17	18601311	18639431	213	0.0734954	0.110849	0.0173163	0.933399
	YEATS2-AS1	3	183524245	183528262	476	0.132494	0.0207748	0.0158649	0.933399
	ABO	9	136130951	136150617	595	0.188737	0.0134895	0.0236203	0.973953
	ACAN	15	89346674	89418585	454	0.0102627	0.306352	0.0288929	0.973953
	ACHE	7	100487615	100494594	344	0.0387646	0.0478239	0.02798	0.973953
	ACP6	1	147101453	147142618	414	0.0313705	0.0357968	0.0238624	0.973953
	AMACR	5	33986283	34008220	420	0.00567918	0.551138	0.0226283	0.973953
	B3GAT2	6	71566382	71666741	417	0.557605	0.00903743	0.0291716	0.973953
	BANF1	11	65769648	65771620	347	0.0174503	0.0737534	0.0227432	0.973953
	BTBD1	15	83685174	83736086	339	0.017703	0.292738	0.0323917	0.973953
	C19orf40	19	33463115	33469128	446	0.444869	0.0147474	0.0300683	0.973953
	C7orf13	7	156431057	156433348	465	0.87751	0.00587767	0.0258346	0.973953
	CANX	5	179125407	179157926	463	0.0169974	0.230172	0.0319919	0.973953
	CBX8	17	77765931	77775482	482	0.0616282	0.028187	0.0242565	0.973953
	CEP89	19	33369902	33462897	446	0.958781	0.00870122	0.0271637	0.973953
	CLUAP1	16	3550924	3589032	366	0.0101893	0.58299	0.0305689	0.973953
	CNIH2	11	66045661	66051683	322	0.00837959	0.595128	0.032741	0.973953
	COX4I2	20	30225691	30232809	283	0.0352661	0.0880913	0.0224126	0.973953
	CTD-3074O7.12	11	66303369	66305407	263	0.336104	0.010212	0.0297644	0.973953
	CTSW	11	65647280	65651212	350	0.983899	0.00724308	0.0325832	0.973953
	CYP4A22	1	47603107	47615413	423	0.693004	0.0159662	0.0291686	0.973953
	EHBP1L1	11	65343509	65360121	353	0.039775	0.086499	0.0308407	0.973953
	ENHO	9	34521038	34523039	358	0.748429	0.00495952	0.0215007	0.973953
	EPO	7	100318423	100321323	299	0.023668	0.125238	0.0306535	0.973953
	EXOC2	6	485133	693117	629	0.453556	0.0144063	0.032497	0.973953
	G6PC2	2	169757750	169766505	570	0.0108599	0.940572	0.0232744	0.973953
	GIGYF1	7	100277130	100287071	293	0.510445	0.00838896	0.0275893	0.973953
	GSKIP	14	96830208	96853625	558	0.480152	0.00977998	0.0254067	0.973953
	HYAL3	3	50330476	50333204	329	0.0098414	0.191355	0.0241858	0.973953
	IFI6	1	27992572	27998729	261	0.0946296	0.0396368	0.0328389	0.973953
	IGLV4-60	22	22516592	22517074	414	0.0106096	0.57964	0.0300965	0.973953
	KREMEN1	22	29469066	29564321	390	0.0249888	0.319541	0.028212	0.973953
	LDLRAP1	1	25870071	25895377	347	0.00697749	0.747095	0.0295826	0.973953
	LINC01006	7	156264890	156398458	474	0.669435	0.00684556	0.028315	0.973953
	2020-03-08	10	45950035	46090354	228	0.53885	0.0050718	0.0205006	0.973953
	MFHAS1	8	8640864	8751155	702	0.198692	0.0272424	0.0283718	0.973953
	MMS22L	6	97590037	97731086	334	0.211272	0.00883794	0.0207582	0.973953
	NOL8	9	95059640	95087765	411	0.0131218	0.302391	0.0246824	0.973953
	OOEP	6	74078278	74104470	381	0.0105119	0.448868	0.0313968	0.973953
	PACS1	11	65837925	66012218	361	0.00675791	0.767242	0.0281422	0.973953
	PFDN1	5	139624624	139682706	308	0.582654	0.00670925	0.0249035	0.973953
	PHLDB3	19	43979255	44009087	374	0.122518	0.0255653	0.0235073	0.973953
	PIGO	9	35088685	35096591	336	0.00857465	0.450046	0.0315637	0.973953
	PLEKHA1	10	124134212	124191867	618	0.20304	0.0407439	0.0272352	0.973953
	PLEKHH2	2	43864412	43995126	474	0.020173	0.124712	0.0235382	0.973953
	PPFIA1	11	70116806	70230509	419	0.0263124	0.131122	0.0207374	0.973953
	PTPRCAP	11	67202981	67205518	242	0.00982559	0.218062	0.0269228	0.973953
	RAD9A	11	67159176	67165653	257	0.067882	0.0224466	0.0245098	0.973953
	RP1-90J20.12	6	3020388	3022984	680	0.415155	0.0215587	0.031783	0.973953
	RP11-184J23.2	1	47540450	47541651	410	0.597962	0.0129317	0.0296975	0.973953
	RP11-394I13.3	2	174876584	174877703	408	0.0520034	0.0500361	0.0213127	0.973953
	RP11-486A14.2	12	93710911	93771512	410	0.712966	0.00610002	0.023431	0.973953
	RP11-496N12.6	1	225634945	225653045	407	0.115175	0.0981025	0.0289303	0.973953
	RP11-532F6.3	6	708592	711405	626	0.315636	0.0221476	0.0321116	0.973953
	RP11-96H19.1	12	46777462	46850051	347	0.0188631	0.219963	0.0255446	0.973953
	RP5-968P14.2	1	27018623	27020622	327	0.00970875	0.773694	0.025011	0.973953
	RRBP1	20	17594323	17662940	620	0.390549	0.00799692	0.0256047	0.973953
	SETDB1	1	150898739	150937213	309	0.148409	0.0830332	0.025282	0.973953
	SLC7A9	19	33321415	33360672	421	0.247434	0.0154329	0.0319362	0.973953
	SRA1	5	139917175	139937853	329	0.0118336	0.1663	0.0270889	0.973953
	SURF1	9	136218610	136223552	603	0.0486508	0.0231568	0.0226932	0.973953
	THEM4	1	151846060	151882284	336	0.776444	0.00748671	0.0314205	0.973953
	TRIM52-AS1	5	180688213	180699308	186	0.327226	0.00804592	0.0220087	0.973953
	TYW1B	7	72023729	72298777	133	0.363063	0.00960539	0.0278959	0.973953
	WDR27	6	169857307	170102159	499	0.109728	0.0439915	0.0262154	0.973953
	ZNF160	19	53569859	53606689	485	0.011804	0.329645	0.0289012	0.973953
	ZNF575	19	44029649	44040282	382	0.574073	0.0117965	0.0319972	0.973953
	A3GALT2	1	33772367	33786699	434	0.262536	0.451299	0.432308	0.976499
	A4GALT	22	43088127	43117304	477	0.473038	0.732092	0.670063	0.976499
	A4GNT	3	137842560	137851229	364	0.44453	0.371115	0.464503	0.976499
	AADAC	3	151531825	151546276	440	0.14944	0.587796	0.235979	0.976499
	AADAT	4	170981373	171012850	354	0.0885093	0.216484	0.110181	0.976499
	AASDH	4	57204456	57253666	446	0.113336	0.834037	0.32636	0.976499
	ABCA12	2	215796266	216003151	482	0.030379	0.794909	0.10836	0.976499
	ABCA8	17	66863433	66951492	454	0.589196	0.605951	0.695723	0.976499
	ABCG5	2	44039611	44066004	489	0.55145	0.205232	0.409367	0.976499
	ABHD1	2	27346691	27353623	316	0.147099	0.0380414	0.0575467	0.976499
	ABHD12	20	25275379	25371619	363	0.773061	0.199736	0.391213	0.976499
	ABHD8	19	17402940	17421045	429	0.0179968	0.374713	0.0448544	0.976499
	ABRACL	6	139349819	139364439	472	0.568785	0.466647	0.604551	0.976499
	AC000078.5	22	19874812	19875493	551	0.133322	0.142929	0.101738	0.976499
	AC002055.4	22	51195376	51239737	198	0.0803966	0.606644	0.155671	0.976499
	AC002064.5	7	89941810	89951906	476	0.291065	0.323569	0.294549	0.976499
	AC002310.12	16	30546669	30548465	182	0.385141	0.902595	0.744709	0.976499
	AC002398.13	19	36261653	36261930	431	0.859379	0.0310933	0.118509	0.976499
	AC002451.3	7	95225994	95243031	508	0.47157	0.25775	0.387539	0.976499
	AC002456.2	7	90219933	90226667	451	0.91731	0.291448	0.621117	0.976499
	AC002467.7	7	107383262	107384881	436	0.368501	0.859074	0.635519	0.976499
	AC004012.1	7	95101147	95103310	473	0.629417	0.391256	0.654564	0.976499
	AC004540.5	7	26438213	26538594	493	0.437007	0.267632	0.351068	0.976499
	AC004791.2	19	15962803	15975714	553	0.652808	0.605311	0.740601	0.976499
	AC004840.9	7	2477398	2487485	446	0.440341	0.246083	0.277935	0.976499
	AC004870.5	7	47092391	47093272	569	0.546342	0.298641	0.457557	0.976499
	AC004951.5	7	44024593	44029806	361	0.0812072	0.268516	0.154133	0.976499
	AC004967.7	7	97598317	97601566	339	0.748229	0.0448791	0.099137	0.976499
	AC004980.10	7	76279718	76280214	155	0.340999	0.735417	0.630157	0.976499
	AC004980.7	7	76178677	76257299	178	0.207747	0.894319	0.494861	0.976499
	AC004985.12	7	44001189	44012924	364	0.126317	0.290943	0.219794	0.976499
	AC005104.3	2	242290755	242291130	373	0.788639	0.0405287	0.144806	0.976499
	AC005152.3	17	70017992	70030233	528	0.0663589	0.76858	0.197702	0.976499
	AC005154.6	7	30555925	30625588	468	0.917221	0.369907	0.677195	0.976499
	AC005154.8	7	30583669	30584047	462	0.835099	0.38838	0.698719	0.976499
	AC005363.9	16	2013841	2014096	450	0.711363	0.312537	0.451686	0.976499
	AC005517.3	17	15410180	15410668	398	0.111958	0.496572	0.25602	0.976499
	AC005519.4	14	74755830	74761128	383	0.110256	0.933405	0.21452	0.976499
	AC005682.6	7	22903493	22920969	482	0.275535	0.679091	0.512425	0.976499
	AC005682.8	7	22928990	22980809	456	0.669881	0.32205	0.582756	0.976499
	AC006111.1	16	3725411	3727060	382	0.924835	0.0927276	0.28376	0.976499
	AC006262.5	19	46692423	46706340	415	0.357539	0.497928	0.577229	0.976499
	AC006262.6	19	46706683	46718094	415	0.451413	0.458398	0.594807	0.976499
	AC006272.1	19	52343177	52346577	612	0.104297	0.0996	0.0917147	0.976499
	AC006946.16	22	17548711	17551565	497	0.762561	0.255401	0.448291	0.976499
	AC007193.6	19	46604380	46699475	410	0.831917	0.327778	0.646137	0.976499
	AC007193.9	19	46885749	46886426	396	0.895688	0.289376	0.636843	0.976499
	AC007246.3	2	39663778	39873530	326	0.935793	0.185763	0.475824	0.976499
	AC007278.3	2	103055173	103056935	563	0.642354	0.439701	0.563742	0.976499
	AC007283.4	2	202027207	202027403	356	0.177018	0.730813	0.384556	0.976499
	AC007292.6	19	4363876	4364637	378	0.249097	0.242918	0.291593	0.976499
	AC007461.1	17	70036164	70036787	524	0.124497	0.651209	0.308755	0.976499
	AC007461.2	17	70068474	70089622	515	0.152211	0.599549	0.317868	0.976499
	AC007773.2	19	32880956	32895914	417	0.909667	0.0583576	0.165852	0.976499
	AC007952.5	17	18996287	18999674	205	0.985501	0.419931	0.703042	0.976499
	AC007966.1	2	186584601	186605206	294	0.178902	0.343519	0.243526	0.976499
	AC008073.7	2	24388753	24397874	283	0.45283	0.656911	0.642705	0.976499
	AC008073.9	2	24422708	24424567	285	0.444421	0.662863	0.576239	0.976499
	AC008174.3	2	186648418	186652936	295	0.278384	0.362267	0.325478	0.976499
	AC009228.1	2	24437250	24444385	276	0.352925	0.703027	0.562348	0.976499
	AC009336.24	2	177043153	177043736	463	0.0906168	0.719849	0.251044	0.976499
	AC009404.2	2	118591513	118599234	469	0.704439	0.33508	0.521567	0.976499
	AC009495.3	2	166689558	166695608	432	0.243422	0.412006	0.394913	0.976499
	AC009506.1	2	160471807	160473593	485	0.542231	0.602925	0.691788	0.976499
	AC010492.2	19	54732911	54734088	492	0.0684088	0.679747	0.141154	0.976499
	AC010883.5	2	43456712	43460533	496	0.134878	0.293129	0.162312	0.976499
	AC011330.5	15	43955852	43976537	263	0.207708	0.993028	0.507652	0.976499
	AC012358.8	2	55535628	55573185	488	0.0541994	0.83496	0.175253	0.976499
	AC012363.8	2	120969303	120970438	325	0.0939509	0.723802	0.272738	0.976499
	AC012442.5	2	113371790	113372008	450	0.164605	0.741764	0.373675	0.976499
	AC016683.6	2	113969099	114034158	458	0.421182	0.613689	0.574104	0.976499
	AC016747.3	2	61368732	61372104	315	0.320616	0.581763	0.515612	0.976499
	AC016773.1	4	1741078	1743830	270	0.28647	0.347684	0.428609	0.976499
	AC016995.3	2	38633861	38742882	451	0.563341	0.501799	0.639239	0.976499
	AC017074.2	2	114435279	114461655	321	0.0375867	0.198017	0.0780994	0.976499
	AC017076.5	2	6968645	6980595	612	0.881781	0.379876	0.716807	0.976499
	AC018638.1	7	128293740	128293989	367	0.622579	0.210214	0.437644	0.976499
	AC018766.5	19	50360227	50362546	352	0.206369	0.517231	0.37848	0.976499
	AC018865.9	2	130794531	130795995	244	0.400507	0.981368	0.746652	0.976499
	AC020910.2	19	35166998	35168486	414	0.312392	0.280587	0.309818	0.976499
	AC021860.1	4	38628029	38629659	606	0.715994	0.594662	0.752046	0.976499
	AC022532.1	10	72194585	72196314	661	0.343489	0.195008	0.246245	0.976499
	AC024560.3	3	197305084	197354777	369	0.47892	0.614468	0.585838	0.976499
	AC024937.4	3	195723609	195725104	294	0.728466	0.342105	0.654083	0.976499
	AC024937.6	3	195664114	195665610	283	0.088406	0.527542	0.231155	0.976499
	AC025165.8	12	58005901	58011848	337	0.175194	0.276197	0.219416	0.976499
	AC026740.1	5	667759	668839	351	0.917759	0.222291	0.493157	0.976499
	AC034193.5	3	10028805	10046928	525	0.569837	0.627316	0.749264	0.976499
	AC034220.3	5	131646978	131705340	421	0.387555	0.268753	0.436315	0.976499
	AC062017.1	2	240323130	240324058	518	0.963478	0.141935	0.39569	0.976499
	AC069213.1	3	195341818	195347104	298	0.186513	0.805663	0.452262	0.976499
	AC069513.4	3	195382436	195384798	284	0.304532	0.690704	0.542248	0.976499
	AC072062.1	2	215674953	215827998	435	0.290658	0.795989	0.594074	0.976499
	AC073150.6	7	27531301	27532384	454	0.0407166	0.596338	0.126628	0.976499
	AC074138.3	19	37176342	37178351	285	0.361511	0.092792	0.205581	0.976499
	AC074212.6	19	46271054	46275762	390	0.82928	0.0896598	0.276851	0.976499
	AC074286.1	2	178148236	178213203	475	0.555829	0.00975562	0.0372544	0.976499
	AC074289.1	2	64370373	64479993	398	0.961587	0.165257	0.450697	0.976499
	AC079776.2	2	130680435	130691890	289	0.232968	0.974642	0.540792	0.976499
	AC079922.3	2	113399409	113403267	479	0.187148	0.790152	0.443207	0.976499
	AC084018.1	12	122233173	122241812	337	0.429303	0.798362	0.739022	0.976499
	AC084125.4	8	145660602	145665354	185	0.355263	0.828544	0.693461	0.976499
	AC091729.7	7	1114086	1117672	391	0.460044	0.441632	0.493559	0.976499
	AC091729.9	7	1200121	1204903	400	0.5284	0.401797	0.623523	0.976499
	AC091801.1	7	3179868	3214287	595	0.573084	0.500861	0.655639	0.976499
	AC092295.7	19	37063972	37085610	306	0.760731	0.0862479	0.249531	0.976499
	AC093110.3	2	54889693	54889929	570	0.607719	0.321491	0.530643	0.976499
	AC093162.5	2	85542164	85543652	447	0.486759	0.340457	0.556765	0.976499
	AC093375.1	2	156868129	156881125	353	0.0553751	0.99575	0.168509	0.976499
	AC093642.3	2	242912834	242919427	134	0.0534974	0.526541	0.138707	0.976499
	AC093668.2	7	102120179	102121095	242	0.453187	0.0284926	0.0760607	0.976499
	AC093838.4	2	132250386	132279146	166	0.0712954	0.458703	0.152355	0.976499
	AC094019.4	3	32192575	32193387	514	0.475585	0.0370264	0.0747816	0.976499
	AC103965.1	15	84867600	84898888	246	0.855436	0.315207	0.592232	0.976499
	AC104057.1	7	65112081	65113280	189	0.371658	0.644122	0.554538	0.976499
	AC104135.2	2	75146682	75151973	457	0.0237106	0.879925	0.0761748	0.976499
	AC104135.3	2	75145275	75165545	457	0.0217326	0.864928	0.0724369	0.976499
	AC104135.4	2	75167385	75169797	461	0.0746556	0.78858	0.204492	0.976499
	AC108004.2	17	33615	41378	199	0.381047	0.275387	0.318838	0.976499
	AC110619.2	2	241388835	241396131	529	0.460009	0.415212	0.524634	0.976499
	AC112229.4	2	111143954	111145740	146	0.0166336	0.967334	0.0670142	0.976499
	AC112229.7	2	111132715	111140688	142	0.0383492	0.827829	0.122635	0.976499
	AC114730.3	2	242749407	242753111	192	0.617277	0.373295	0.608468	0.976499
	AC118278.1	4	130242	130349	155	0.311012	0.417304	0.307095	0.976499
	AC125232.1	2	87257800	87303536	108	0.725531	0.125714	0.229744	0.976499
	AC130469.2	19	8646044	8647599	406	0.378847	0.516153	0.59996	0.976499
	AC131097.3	2	242823514	243020873	162	0.480532	0.348177	0.516239	0.976499
	AC131097.4	2	242836136	242844702	158	0.246357	0.481924	0.438293	0.976499
	AC131971.1	11	3011093	3012563	461	0.380271	0.821294	0.66018	0.976499
	AC136289.1	3	63727969	63813121	595	0.887459	0.199427	0.480129	0.976499
	AC138969.4	16	16416162	16444447	311	0.593293	0.583588	0.667041	0.976499
	ACACA	17	35441923	35766909	358	0.769822	0.365453	0.620258	0.976499
	ACAD9	3	128598439	128634910	356	0.370199	0.113806	0.176203	0.976499
	ACOT2	14	74034324	74042357	362	0.433035	0.75574	0.632818	0.976499
	ACOT7	1	6324329	6453614	419	0.272653	0.361521	0.369938	0.976499
	ACSF3	16	89154783	89222254	436	0.554218	0.290598	0.494139	0.976499
	ACSM1	16	20634559	20710212	393	0.505767	0.450581	0.643214	0.976499
	ACSM3	16	20621565	20807446	397	0.866341	0.24771	0.569667	0.976499
	ACTN3	11	66313866	66330800	261	0.484406	0.025183	0.0786675	0.976499
	ACTR5	20	37377085	37400834	442	0.0468263	0.637899	0.135372	0.976499
	ACTR8	3	53901093	53916212	507	0.012284	0.990316	0.0473533	0.976499
	ACYP2	2	54197978	54532437	458	0.356461	0.540153	0.576332	0.976499
	ADAD2	16	84224744	84230772	969	0.374549	0.72651	0.588648	0.976499
	ADAL	15	43622872	43646096	265	0.359446	0.817234	0.694137	0.976499
	ADAM19	5	156822607	157002783	528	0.20501	0.664307	0.37118	0.976499
	ADAM1A	12	112337067	112340042	187	0.257443	0.0432111	0.057721	0.976499
	ADAM21	14	70918874	70926622	528	0.928072	0.376335	0.6516	0.976499
	ADAM32	8	38964509	39142430	288	0.215337	0.364767	0.2648	0.976499
	ADAMTS13	9	136279478	136324508	605	0.0418148	0.0686947	0.0444588	0.976499
	ADAMTS18	16	77281710	77469011	855	0.5025	0.3142	0.47345	0.976499
	ADAT1	16	75630879	75657198	392	0.878142	0.438181	0.749733	0.976499
	ADCK2	7	140372953	140394921	362	0.1447	0.176321	0.162934	0.976499
	ADCK3	1	227085237	227175246	492	0.196396	0.673957	0.283905	0.976499
	ADCY10P1	6	41068761	41108571	573	0.0721891	0.492986	0.186221	0.976499
	ADCY4	14	24787555	24804277	523	0.889135	0.16721	0.422955	0.976499
	ADD2	2	70834750	70995357	557	0.657657	0.371686	0.607749	0.976499
	ADD3	10	111756126	111895323	335	0.790992	0.206372	0.480411	0.976499
	ADH1A	4	100197524	100212185	492	0.820759	0.116262	0.226455	0.976499
	ADH1B	4	100226121	100242558	497	0.0758278	0.365633	0.138509	0.976499
	ADH1C	4	100257649	100274184	510	0.729975	0.136221	0.318819	0.976499
	ADH4	4	100044808	100078949	497	0.158245	0.334922	0.17199	0.976499
	ADH6	4	100123795	100140694	492	0.637406	0.133805	0.31112	0.976499
	ADO	10	64564516	64568238	470	0.62669	0.503315	0.684658	0.976499
	ADORA2B	17	15848231	15879060	296	0.204206	0.767033	0.352377	0.976499
	ADPRHL1	13	114076260	114107839	380	0.636425	0.261579	0.513444	0.976499
	ADRA1A	8	26605667	26724790	655	0.5838	0.338418	0.601952	0.976499
	AF131215.2	8	10965298	10967236	633	0.488728	0.280718	0.325303	0.976499
	AF131215.9	8	10962201	10964214	634	0.194884	0.584872	0.382045	0.976499
	AF131217.1	21	29811667	30047170	497	0.217232	0.218776	0.184181	0.976499
	AFAP1	4	7760441	7874040	738	0.495385	0.406823	0.507305	0.976499
	AGA	4	178351924	178363657	444	0.120026	0.560078	0.251938	0.976499
	AGAP4	10	46321042	46349323	123	0.697424	0.29967	0.593052	0.976499
	AGAP6	10	51748078	51770259	217	0.514327	0.534496	0.682582	0.976499
	AGAP8	10	51224681	51252947	187	0.821332	0.133717	0.359084	0.976499
	AGAP9	10	48189612	48237508	195	0.469815	0.382544	0.514305	0.976499
	AGER	6	32148745	32152101	163	0.332172	0.77375	0.61801	0.976499
	AGT	1	230838269	230850043	689	0.517584	0.143439	0.315868	0.976499
	AGXT	2	241807896	241818537	487	0.109253	0.267803	0.112801	0.976499
	AHI1	6	135604670	135818885	367	0.411849	0.154023	0.262412	0.976499
	AHSA2	2	61404553	61418338	306	0.382551	0.492067	0.483894	0.976499
	AIM2	1	159032274	159116886	472	0.620808	0.330707	0.602899	0.976499
	AKAP13	15	85923802	86292586	580	0.106275	0.756674	0.295609	0.976499
	AKAP3	12	4724674	4758213	695	0.0263809	0.640007	0.0777402	0.976499
	AKIP1	11	8932686	8941622	370	0.290289	0.698087	0.558865	0.976499
	AKR1E2	10	4828821	4890254	668	0.199653	0.75391	0.459156	0.976499
	AKR7A2	1	19630459	19638640	488	0.995374	0.348064	0.628899	0.976499
	AKR7L	1	19592476	19600688	501	0.0342833	0.31621	0.0525591	0.976499
	AKT1	14	105235724	105262088	371	0.288624	0.437438	0.390938	0.976499
	AKTIP	16	53525562	53538323	402	0.258083	0.580014	0.478492	0.976499
	AL022393.7	6	28143966	28144452	467	0.879448	0.420843	0.745119	0.976499
	AL035610.2	21	29488413	29600986	436	0.0442585	0.602087	0.0885093	0.976499
	AL049840.1	14	104177607	104179149	351	0.696552	0.184742	0.419344	0.976499
	AL132989.1	14	58754751	58755865	454	0.948735	0.262068	0.605739	0.976499
	AL592494.5	1	121138614	121204983	22	0.510704	0.579221	0.599888	0.976499
	ALAD	9	116148597	116163613	570	0.0268486	0.231242	0.0608192	0.976499
	ALDH16A1	19	49956426	49974305	371	0.423687	0.769617	0.728681	0.976499
	ALDH18A1	10	97365696	97416463	511	0.0471721	0.639635	0.109498	0.976499
	ALDH1L1	3	125822412	125916837	466	0.291043	0.653838	0.570254	0.976499
	ALDH2	12	112204691	112247782	222	0.0455699	0.715359	0.0959811	0.976499
	ALDH7A1	5	125877533	125931110	416	0.202388	0.199552	0.174546	0.976499
	ALDH8A1	6	135238528	135271260	403	0.169016	0.0879609	0.080959	0.976499
	ALG10B	12	38710380	38717784	228	0.726979	0.361747	0.627073	0.976499
	ALG11	13	52586534	52598826	355	0.478708	0.874345	0.722109	0.976499
	ALG12	22	50293877	50312106	428	0.0730977	0.518294	0.158772	0.976499
	ALKBH5	17	18086392	18113268	306	0.970949	0.0145187	0.0386298	0.976499
	ALMS1P	2	73872046	73912703	356	0.993266	0.134079	0.342923	0.976499
	ALOX12	17	6899384	6914055	496	0.246571	0.218852	0.195351	0.976499
	ALOX5	10	45869661	45941561	348	0.185712	0.0288735	0.0593854	0.976499
	ALPK1	4	113206665	113363762	395	0.326377	0.0849454	0.166805	0.976499
	ALS2	2	202565277	202645912	425	0.352879	0.263142	0.376578	0.976499
	ALS2CR12	2	202152994	202222121	351	0.578218	0.361784	0.581975	0.976499
	AMDHD1	12	96337071	96362370	552	0.980182	0.345204	0.686745	0.976499
	AMHR2	12	53817639	53825318	399	0.172713	0.927808	0.330485	0.976499
	AMICA1	11	118064455	118095809	550	0.865288	0.363406	0.677681	0.976499
	AMPH	7	38423305	38671167	547	0.672082	0.617721	0.738516	0.976499
	AMY2B	1	104104379	104122156	160	0.0317109	0.696391	0.0935761	0.976499
	AMZ2P1	17	62962668	62971694	293	0.316957	0.507911	0.537102	0.976499
	ANAPC13	3	134196548	134205558	469	0.278122	0.966939	0.625668	0.976499
	ANAPC4	4	25378835	25420120	542	0.0441918	0.388094	0.120177	0.976499
	ANKLE1	19	17392454	17398455	417	0.143572	0.179959	0.14319	0.976499
	ANKMY1	2	241418839	241508626	496	0.941977	0.412098	0.743235	0.976499
	ANKRD18CP	9	99918852	99983517	311	0.721421	0.218112	0.361014	0.976499
	ANKRD20A9P	13	19390858	19446107	264	0.0860164	0.443461	0.190398	0.976499
	ANKRD27	19	33087913	33166105	409	0.0498096	0.0571824	0.0375265	0.976499
	ANKRD36BP2	2	89065324	89106126	164	0.264215	0.110589	0.191487	0.976499
	ANKRD40	17	48770551	48785285	426	0.92167	0.215174	0.474649	0.976499
	ANKRD44	2	197831741	198175897	341	0.264577	0.791575	0.566936	0.976499
	ANKRD50	4	125585207	125633887	386	0.365656	0.619073	0.60478	0.976499
	ANO5	11	22214722	22304903	376	0.401633	0.183026	0.33337	0.976499
	ANO7	2	242127924	242164791	411	0.0250355	0.281704	0.0650925	0.976499
	ANO7P1	1	16542404	16554522	324	0.399333	0.749162	0.702561	0.976499
	ANTXR2	4	80822303	81046608	377	0.18683	0.814584	0.458386	0.976499
	ANTXRL	10	47657581	47701443	56	0.638319	0.480082	0.697562	0.976499
	ANXA3	4	79472673	79531575	465	0.406215	0.512928	0.499773	0.976499
	ANXA8L1	10	47157983	47174093	41	0.827611	0.162365	0.361491	0.976499
	ANXA8L2	10	47746936	47763041	56	0.662827	0.268294	0.457263	0.976499
	AOX1	2	201450591	201541787	478	0.229665	0.67756	0.428488	0.976499
	AP000344.3	22	23775751	23777258	521	0.367956	0.665706	0.477725	0.976499
	AP000344.4	22	23788785	23803020	506	0.304308	0.714418	0.559904	0.976499
	AP000347.2	22	24000281	24059543	462	0.563204	0.174212	0.309141	0.976499
	AP000347.4	22	23980679	23982949	472	0.762891	0.379482	0.603672	0.976499
	AP000350.4	22	24236770	24241117	421	0.348032	0.15868	0.24081	0.976499
	AP000350.5	22	24243619	24249255	422	0.375983	0.151268	0.237737	0.976499
	AP000350.6	22	24269087	24271761	407	0.473307	0.1833	0.26933	0.976499
	AP000351.10	22	24373117	24374043	381	0.0465051	0.367414	0.0858755	0.976499
	AP000436.4	11	64792862	64793987	332	0.480823	0.0696476	0.13503	0.976499
	AP000473.8	21	18015848	18017384	386	0.620568	0.0936014	0.13348	0.976499
	AP000688.8	21	37377636	37380136	513	0.285585	0.824301	0.585124	0.976499
	AP000769.1	11	65222728	65234028	360	0.644115	0.142297	0.323146	0.976499
	AP001062.7	21	45751117	45755734	484	0.985395	0.169472	0.321236	0.976499
	AP001347.6	21	15399742	15516789	332	0.444903	0.550707	0.637942	0.976499
	AP001469.9	21	47671616	47674047	474	0.65412	0.459762	0.725113	0.976499
	AP001625.6	21	43980484	43982044	728	0.0117664	0.767971	0.0421469	0.976499
	AP001627.1	21	44153704	44161868	650	0.199803	0.517148	0.391734	0.976499
	AP001816.1	4	102268937	102270040	359	0.190356	0.121342	0.158648	0.976499
	AP003068.18	11	64941588	64943941	330	0.0872495	0.249377	0.112426	0.976499
	AP003068.23	11	64945077	64949157	331	0.0911753	0.279484	0.0990257	0.976499
	AP006621.9	11	708564	709023	464	0.0986079	0.981076	0.276919	0.976499
	AP1AR	4	113152893	113191203	389	0.120058	0.159923	0.149287	0.976499
	AP1M1	19	16308389	16346160	458	0.499477	0.555277	0.698159	0.976499
	AP3M2	8	42010464	42029191	364	0.264053	0.78909	0.555185	0.976499
	AP4B1	1	114437370	114447762	468	0.765	0.194706	0.468844	0.976499
	AP4E1	15	51200869	51298097	477	0.655946	0.391364	0.626269	0.976499
	AP4M1	7	99699564	99707968	274	0.954064	0.126351	0.372498	0.976499
	APAF1	12	99038919	99128461	443	0.0814663	0.372166	0.0866543	0.976499
	APBB1IP	10	26727132	26856732	440	0.161845	0.537882	0.309504	0.976499
	APBB2	4	40812044	41218731	466	0.0831587	0.315712	0.121419	0.976499
	APIP	11	34874641	34938046	689	0.488128	0.48108	0.652564	0.976499
	APITD1	1	10490840	10502866	387	0.558585	0.118764	0.279771	0.976499
	APOBEC3G	22	39473010	39483748	394	0.439255	0.567864	0.623932	0.976499
	APOL4	22	36585172	36600886	501	0.672794	0.411075	0.639722	0.976499
	APTX	9	32972604	33025166	479	0.176111	0.355873	0.135378	0.976499
	AQPEP	5	115298151	115363316	562	0.308081	0.371233	0.248304	0.976499
	AREG	4	75310851	75320726	337	0.376025	0.900517	0.70852	0.976499
	ARF3	12	49329506	49351334	338	0.138242	0.990996	0.310269	0.976499
	ARFIP1	4	153701089	153839615	388	0.55894	0.296869	0.524514	0.976499
	ARHGAP1	11	46698630	46722149	238	0.731423	0.485117	0.64903	0.976499
	ARHGEF19	1	16524712	16539104	335	0.361824	0.73785	0.662194	0.976499
	ARHGEF25	12	58003963	58013162	338	0.246514	0.254172	0.301179	0.976499
	ARHGEF26	3	153838792	153975616	393	0.147378	0.742838	0.361443	0.976499
	ARHGEF34P	7	143969538	143991256	331	0.78633	0.374659	0.684992	0.976499
	ARHGEF35	7	143883176	143885488	296	0.380777	0.519005	0.476987	0.976499
	ARHGEF39	9	35658872	35675757	407	0.740907	0.232477	0.406952	0.976499
	ARHGEF5	7	144052381	144077725	339	0.266512	0.340168	0.27367	0.976499
	ARHGEF7	13	111767266	111958084	585	0.0556369	0.343649	0.0921142	0.976499
	ARID4A	14	58765103	58840605	458	0.300056	0.409817	0.45363	0.976499
	ARL14EP	11	30344598	30359774	389	0.125854	0.324423	0.146338	0.976499
	ARL16	17	79648204	79650954	327	0.548936	0.670142	0.688994	0.976499
	ARL17A	17	44594068	44657088	143	0.81121	0.254238	0.553219	0.976499
	ARL17B	17	44352150	44439130	60	0.0647865	0.184806	0.109835	0.976499
	ARL5B-AS1	10	18942213	18948214	586	0.136977	0.832155	0.329245	0.976499
	ARL6IP1	16	18802991	18813000	225	0.428577	0.463232	0.570361	0.976499
	ARL6IP4	12	123466197	123467456	321	0.0815733	0.687452	0.214368	0.976499
	ARL9	4	57371509	57390614	444	0.600298	0.577221	0.720254	0.976499
	ARMC1	8	66514694	66546442	363	0.730868	0.472709	0.634889	0.976499
	ARMC10	7	102715328	102740205	240	0.410279	0.243948	0.314359	0.976499
	ARMC2	6	109169619	109295186	388	0.636229	0.344525	0.571411	0.976499
	ARNT	1	150782181	150849244	305	0.717698	0.0489629	0.163709	0.976499
	ARPC2	2	219081817	219119079	454	0.767613	0.546641	0.734775	0.976499
	ARPP19	15	52839242	52862080	451	0.979377	0.0888473	0.285606	0.976499
	ARSB	5	78073032	78281910	454	0.137137	0.726885	0.33911	0.976499
	AS3MT	10	104629273	104661656	344	0.503133	0.0942443	0.208216	0.976499
	ASAH2	10	51942538	52008370	323	0.23697	0.602901	0.434859	0.976499
	ASAH2B	10	52499078	52576255	465	0.139292	0.820189	0.299919	0.976499
	ASAP1	8	131064353	131455906	542	0.0853165	0.269661	0.150889	0.976499
	ASB4	7	95107756	95169544	476	0.195722	0.636881	0.316208	0.976499
	ASGR2	17	7004641	7019019	496	0.175644	0.362606	0.184571	0.976499
	ASH1L	1	155305059	155491409	234	0.882112	0.310052	0.587913	0.976499
	ASLP1	22	23991400	23995521	467	0.378215	0.399994	0.426132	0.976499
	ASNS	7	97481430	97501854	363	0.654104	0.0613168	0.117865	0.976499
	ASPDH	19	51014857	51017947	462	0.775101	0.379101	0.627413	0.976499
	ATAD3B	1	1407143	1431582	288	0.265514	0.935491	0.604333	0.976499
	ATF4	22	39915700	39918691	396	0.862998	0.195685	0.495278	0.976499
	ATF6	1	161736084	161933860	487	0.867946	0.332682	0.640201	0.976499
	ATF7IP2	16	10420291	10577495	611	0.820002	0.264751	0.541317	0.976499
	ATG16L2	11	72525353	72554719	339	0.360335	0.22226	0.377523	0.976499
	ATHL1	11	289138	296107	317	0.384618	0.884522	0.683714	0.976499
	ATIC	2	216176540	216214487	468	0.987238	0.287427	0.530833	0.976499
	ATOH7	10	69990386	69991871	385	0.272845	0.746558	0.567457	0.976499
	ATP11B	3	182511288	182639027	360	0.334642	0.406461	0.471445	0.976499
	ATP1B2	17	7549945	7561086	499	0.721898	0.362043	0.627702	0.976499
	ATP5G2	12	54026510	54071192	420	0.170736	0.99339	0.398149	0.976499
	ATP5O	21	35275757	35288284	407	0.230317	0.0711807	0.125111	0.976499
	ATP6AP1L	5	81575281	81682796	438	0.667924	0.541787	0.725067	0.976499
	ATP6V0A2	12	124196865	124246302	399	0.269118	0.40792	0.383822	0.976499
	ATP6V1D	14	67761088	67826713	401	0.450882	0.0472938	0.0849844	0.976499
	ATP6V1E2	2	46717889	46769696	672	0.273759	0.416492	0.457174	0.976499
	ATP6V1G2	6	31512239	31514625	281	0.227212	0.615438	0.41298	0.976499
	ATP8A1	4	42410390	42659122	485	0.847846	0.366712	0.609861	0.976499
	ATPAF2	17	17880723	17942523	351	0.413587	0.104099	0.166777	0.976499
	ATPIF1	1	28562620	28573417	255	0.446197	0.0858258	0.135607	0.976499
	ATRAID	2	27435155	27440046	315	0.145363	0.2596	0.100394	0.976499
	AVEN	15	34158428	34331377	556	0.119894	0.17711	0.147711	0.976499
	AXDND1	1	179334855	179523870	477	0.4925	0.689621	0.704021	0.976499
	AZGP1P1	7	99578385	99585158	271	0.30523	0.164148	0.251584	0.976499
	B3GALTL	13	31774073	31906413	586	0.781278	0.120457	0.250648	0.976499
	B3GNT8	19	41931456	41934635	365	0.286412	0.550575	0.487986	0.976499
	B3GNTL1	17	80901667	81009686	254	0.551766	0.0537768	0.161475	0.976499
	B4GALT3	1	161141100	161146638	373	0.343793	0.370649	0.47299	0.976499
	BAK1	6	33540329	33548019	500	0.186415	0.466709	0.225993	0.976499
	BAK1P1	20	31276723	31278816	400	0.686987	0.149019	0.369585	0.976499
	BARD1	2	215590370	215674428	435	0.289207	0.465264	0.311882	0.976499
	BBS2	16	56500748	56554195	489	0.479597	0.142072	0.190612	0.976499
	BBS7	4	122745595	122791652	383	0.0673088	0.463542	0.176511	0.976499
	BCO2	11	112046190	112095422	388	0.0646231	0.850653	0.203868	0.976499
	BCS1L	2	219523600	219528166	371	0.473388	0.437807	0.53621	0.976499
	BDH1	3	197236654	197300194	383	0.168705	0.677317	0.292911	0.976499
	BDNF-AS	11	27528385	27719721	388	0.897786	0.166078	0.306242	0.976499
	BEGAIN	14	101003486	101053750	428	0.735025	0.301707	0.55849	0.976499
	BEND3P3	10	81444250	81444739	328	0.089776	0.128185	0.044602	0.976499
	BET1L	11	167784	207428	280	0.641431	0.719031	0.748221	0.976499
	BHMT	5	78407602	78428108	415	0.639104	0.252512	0.315683	0.976499
	BICD1	12	32259769	32536567	563	0.195915	0.440733	0.374314	0.976499
	BIN3	8	22479028	22526661	515	0.501345	0.346528	0.417716	0.976499
	BIRC7	20	61867235	61871859	493	0.479332	0.516767	0.656009	0.976499
	BLOC1S2	10	102033713	102046469	410	0.118177	0.0943671	0.0995387	0.976499
	BLVRA	7	43798279	43846939	402	0.916951	0.114605	0.338458	0.976499
	BMPR1A	10	88516407	88692595	340	0.96901	0.314318	0.612256	0.976499
	BMS1P7	10	49256241	49268060	200	0.810348	0.458712	0.746515	0.976499
	BOLA3-AS1	2	74375136	74377188	357	0.0258378	0.939125	0.0774036	0.976499
	BPI	20	36888551	36965907	498	0.545407	0.329378	0.555531	0.976499
	BRINP1	9	121915736	122131745	539	0.320806	0.212014	0.283626	0.976499
	BROX	1	222886080	222908538	323	0.509623	0.497192	0.544382	0.976499
	BRWD1-IT2	21	40685887	40686886	677	0.393926	0.675873	0.683447	0.976499
	BTBD16	10	124030821	124097677	601	0.157349	0.0433734	0.0720878	0.976499
	BTBD6	14	105715249	105717430	222	0.296559	0.50169	0.432845	0.976499
	BTN2A2	6	26383324	26395102	544	0.0427387	0.407574	0.0984656	0.976499
	BTN2A3P	6	26421619	26432611	514	0.0822915	0.264782	0.157925	0.976499
	BTN3A1	6	26402465	26415444	531	0.657411	0.120941	0.265814	0.976499
	BTN3A2	6	26365387	26378546	557	0.432507	0.11691	0.189287	0.976499
	BTNL3	5	180415845	180433727	300	0.0660127	0.0492537	0.04948	0.976499
	BTNL8	5	180326077	180377906	331	0.143607	0.0456289	0.076319	0.976499
	BVES	6	105544697	105585049	379	0.571078	0.24508	0.308021	0.976499
	BZRAP1-AS1	17	56402811	56472371	350	0.220964	0.220685	0.218919	0.976499
	C10orf32	10	104613980	104624718	344	0.971304	0.0774573	0.225676	0.976499
	C10orf88	10	124690419	124713896	568	0.459772	0.0813322	0.206394	0.976499
	C11orf54	11	93475129	93497915	410	0.569536	0.214012	0.448177	0.976499
	C12orf43	12	121440316	121454305	461	0.468173	0.466023	0.413912	0.976499
	C12orf52	12	113623331	113630173	491	0.298248	0.123416	0.213908	0.976499
	C12orf65	12	123717463	123742506	347	0.321388	0.419776	0.499673	0.976499
	C13orf45	13	76445187	76457947	580	0.338067	0.397623	0.411149	0.976499
	C14orf144	14	104710541	104712473	358	0.672299	0.516942	0.717114	0.976499
	C14orf2	14	104378625	104394606	339	0.174459	0.825556	0.439034	0.976499
	C14orf37	14	58466453	58764857	458	0.0227758	0.572837	0.0765233	0.976499
	C14orf79	14	105452112	105465864	317	0.397927	0.569548	0.622098	0.976499
	C15orf40	15	83657193	83680393	322	0.693725	0.399736	0.691196	0.976499
	C16orf3	16	90095316	90096309	267	0.113163	0.948881	0.333194	0.976499
	C16orf93	16	30772519	30774031	208	0.496417	0.632677	0.721137	0.976499
	C17orf51	17	21428051	21454943	164	0.545124	0.700955	0.715286	0.976499
	C17orf62	17	80400522	80408705	404	0.182734	0.637632	0.341044	0.976499
	C17orf75	17	30651681	30677042	255	0.0889991	0.987017	0.249196	0.976499
	C17orf80	17	71228534	71245091	576	0.115935	0.744987	0.229407	0.976499
	C17orf97	17	260118	273510	299	0.851039	0.215566	0.493811	0.976499
	C18orf32	18	47008028	47013622	525	0.801995	0.198269	0.41733	0.976499
	C18orf8	18	21083473	21110576	346	0.985111	0.354245	0.666339	0.976499
	C19orf24	19	1275026	1279248	412	0.423964	0.873777	0.744609	0.976499
	C19orf44	19	16607122	16632163	396	0.54239	0.414534	0.548356	0.976499
	C19orf45	19	7557862	7573336	411	0.0113967	0.430315	0.0357819	0.976499
	C19orf54	19	41246766	41257458	433	0.435847	0.695823	0.662656	0.976499
	C19orf55	19	36249044	36260766	429	0.370428	0.07161	0.12606	0.976499
	C19orf69	19	41949063	41950670	362	0.360462	0.545984	0.587703	0.976499
	C19orf71	19	3539152	3544028	385	0.319331	0.774554	0.634107	0.976499
	C1GALT1	7	7196565	7288282	470	0.243289	0.709038	0.510783	0.976499
	C1orf101	1	244617679	244804479	461	0.64841	0.478158	0.681924	0.976499
	C1orf229	1	247273462	247275719	475	0.540376	0.254965	0.341809	0.976499
	C1QL3	10	16555742	16564004	602	0.116412	0.657937	0.259943	0.976499
	C1QTNF6	22	37576207	37595425	648	0.190855	0.465721	0.319708	0.976499
	C1QTNF9	13	24881304	24896673	725	0.478226	0.160547	0.311565	0.976499
	C20orf112	20	31030862	31172876	387	0.327478	0.193753	0.313747	0.976499
	C20orf203	20	31219428	31261743	403	0.839837	0.185183	0.458911	0.976499
	C21orf119	21	33765439	33766254	487	0.0673641	0.687992	0.172964	0.976499
	C21orf2	21	45749115	45759258	485	0.720362	0.165524	0.283896	0.976499
	C21orf49	21	34144411	34266043	487	0.805481	0.0551259	0.186998	0.976499
	C22orf34	22	49808176	50051190	629	0.32301	0.230418	0.277532	0.976499
	C22orf43	22	23950639	23974508	475	0.227411	0.387437	0.342983	0.976499
	C2CD5	12	22601517	22697480	452	0.499242	0.234643	0.426705	0.976499
	C2orf27A	2	132479948	132524973	124	0.623667	0.491391	0.663486	0.976499
	C2orf40	2	106679702	106694615	485	0.520277	0.229287	0.45491	0.976499
	C2orf43	2	20883788	21022882	512	0.839651	0.0922391	0.282546	0.976499
	C2orf82	2	233733724	233743395	461	0.483246	0.279383	0.421685	0.976499
	C3orf38	3	88199036	88217879	303	0.163764	0.339401	0.280573	0.976499
	C4A	6	31949801	31970458	222	0.538753	0.222149	0.389371	0.976499
	C4B	6	31982539	32003195	189	0.394994	0.922552	0.685211	0.976499
	C4orf21	4	113460492	113558119	474	0.439834	0.147824	0.206799	0.976499
	C4orf32	4	113066553	113116412	393	0.117882	0.221502	0.140886	0.976499
	C4orf33	4	130014765	130037795	373	0.456377	0.570443	0.549391	0.976499
	C5	9	123714616	123812554	376	0.311719	0.776959	0.613116	0.976499
	C5orf17	5	23951457	24178372	338	0.0462673	0.778248	0.14882	0.976499
	C5orf45	5	179261436	179285887	440	0.133881	0.292197	0.226202	0.976499
	C5orf54	5	159820155	159827104	468	0.999031	0.163133	0.451865	0.976499
	C5orf55	5	441645	443258	315	0.77881	0.228791	0.394431	0.976499
	C6orf120	6	170102233	170106401	499	0.164472	0.0314275	0.0489515	0.976499
	C6orf201	6	4079456	4131185	637	0.366001	0.647318	0.52624	0.976499
	C6orf3	6	111921078	111923498	437	0.328194	0.404391	0.47172	0.976499
	C6orf48	6	31802385	31807541	241	0.648255	0.414234	0.627674	0.976499
	C6orf57	6	71276620	71299272	507	0.169432	0.511409	0.354021	0.976499
	C6orf62	6	24705294	24721064	619	0.986686	0.0685956	0.227131	0.976499
	C7orf25	7	42948325	42951904	463	0.577344	0.155712	0.275704	0.976499
	C7orf31	7	25174316	25219975	673	0.725686	0.120479	0.311528	0.976499
	C7orf55-LUC7L2	7	139025105	139108198	352	0.0445261	0.413058	0.0837497	0.976499
	C7orf73	7	135347244	135378166	462	0.0388324	0.786819	0.138325	0.976499
	C8orf31	8	144120626	144141359	407	0.915698	0.400327	0.720914	0.976499
	C8orf33	8	146277764	146281416	131	0.840941	0.0951386	0.280869	0.976499
	C9orf173	9	140145713	140147934	363	0.827532	0.0340918	0.0686856	0.976499
	C9orf37	9	140509813	140513358	345	0.0996896	0.670051	0.228018	0.976499
	C9orf9	9	135753414	135765588	562	0.206558	0.0876179	0.132493	0.976499
	CABLES2	20	60963688	60982341	487	0.127345	0.159387	0.158273	0.976499
	CACTIN	19	3610639	3626813	374	0.315337	0.628871	0.523418	0.976499
	CALB1	8	91070836	91107703	368	0.243522	0.67915	0.527413	0.976499
	CALHM2	10	105206543	105212602	357	0.564791	0.481132	0.662461	0.976499
	CALML6	1	1846266	1848733	329	0.274337	0.576892	0.383169	0.976499
	CAMKK2	12	121675497	121736111	400	0.107303	0.947985	0.241316	0.976499
	CAMSAP1	9	138700333	138799074	428	0.177331	0.665793	0.373082	0.976499
	CAND1	12	67663061	67713731	532	0.578086	0.378303	0.560161	0.976499
	CAND2	3	12837971	12913415	539	0.375555	0.414656	0.435257	0.976499
	CAPG	2	85621871	85645555	459	0.745544	0.437572	0.719674	0.976499
	CAPN1	11	64948665	64979477	331	0.362694	0.192305	0.336998	0.976499
	CAPN10	2	241526133	241557122	491	0.434872	0.436491	0.462435	0.976499
	CAPN13	2	30945637	31043408	624	0.0765703	0.267806	0.11996	0.976499
	CAPN3	15	42651783	42704515	410	0.312688	0.47306	0.434757	0.976499
	CAPRIN2	12	30862486	30907885	560	0.404721	0.0546624	0.141426	0.976499
	CAPS	19	5911780	5915888	385	0.0761407	0.832098	0.178737	0.976499
	CAPZA1	1	113162419	113214241	332	0.292583	0.107441	0.113696	0.976499
	CAPZB	1	19665267	19812066	532	0.726212	0.25476	0.438484	0.976499
	CARD14	17	78143791	78183062	472	0.736835	0.0272664	0.0770317	0.976499
	CARD6	5	40841286	40860275	443	0.213128	0.248764	0.270939	0.976499
	CARD8	19	48684027	48759203	520	0.356259	0.524282	0.512715	0.976499
	CARS	11	3022152	3078843	430	0.252051	0.886355	0.54521	0.976499
	CARS2	13	111293764	111365624	679	0.106668	0.593897	0.259348	0.976499
	CASC1	12	25261354	25348096	577	0.415359	0.206378	0.26588	0.976499
	CASC3	17	38296576	38328436	308	0.630389	0.624983	0.732667	0.976499
	CASKIN1	16	2228131	2246526	349	0.903495	0.350156	0.685088	0.976499
	CASP16	16	3194220	3199964	392	0.797411	0.297737	0.587977	0.976499
	CASP3	4	185548850	185570663	576	0.0739955	0.142369	0.0850148	0.976499
	CASP8	2	202098166	202152434	354	0.421592	0.592428	0.488523	0.976499
	CASP9	1	15817327	15853029	504	0.0439622	0.811046	0.114317	0.976499
	CASQ1	1	160160285	160171676	515	0.331092	0.861164	0.678785	0.976499
	CAT	11	34460472	34493609	610	0.262068	0.960883	0.610231	0.976499
	CATSPER2	15	43920701	43959900	258	0.270216	0.644881	0.481484	0.976499
	CATSPER2P1	15	44019116	44039292	258	0.22749	0.549046	0.439254	0.976499
	CBLN3	14	24895738	24900160	559	0.0517665	0.225059	0.0731756	0.976499
	CBR3	21	37507210	37518864	502	0.177549	0.566646	0.309671	0.976499
	CBWD1	9	121041	188979	471	0.677835	0.168703	0.316636	0.976499
	CBY1	22	39052645	39069859	369	0.919872	0.330655	0.674743	0.976499
	CC2D1B	1	52811395	52831865	256	0.0562387	0.5622	0.104836	0.976499
	CCAR2	8	22462145	22477930	526	0.438782	0.526503	0.490291	0.976499
	CCBL2	1	89401456	89454038	358	0.646462	0.176137	0.378891	0.976499
	CCDC102A	16	57546090	57570511	554	0.275631	0.351368	0.396982	0.976499
	CCDC112	5	114602885	114632528	421	0.782866	0.16531	0.373551	0.976499
	CCDC113	16	58265061	58317740	494	0.101576	0.530621	0.218954	0.976499
	CCDC114	19	48799714	48824068	510	0.724306	0.323425	0.6009	0.976499
	CCDC116	22	21987005	21991616	298	0.189346	0.490425	0.317862	0.976499
	CCDC122	13	44398045	44449063	533	0.571826	0.550309	0.567774	0.976499
	CCDC124	19	18043825	18054800	428	0.0255406	0.960993	0.0662976	0.976499
	CCDC125	5	68576002	68628636	235	0.249307	0.361922	0.346925	0.976499
	CCDC127	5	196986	218330	290	0.513232	0.306038	0.445224	0.976499
	CCDC137	17	79633664	79640934	325	0.467544	0.599674	0.592135	0.976499
	CCDC144CP	17	20224477	20306870	180	0.241839	0.426993	0.428124	0.976499
	CCDC144NL	17	20739760	20799453	200	0.146533	0.52723	0.329162	0.976499
	CCDC15	11	124824017	124911385	507	0.432647	0.823174	0.742633	0.976499
	CCDC153	11	119060933	119066584	379	0.404256	0.836013	0.675566	0.976499
	CCDC154	16	1484384	1494557	480	0.769056	0.15845	0.387014	0.976499
	CCDC158	4	77234155	77343021	520	0.274861	0.435452	0.421945	0.976499
	CCDC171	9	15552895	16061661	455	0.0218962	0.303098	0.0417076	0.976499
	CCDC174	3	14693271	14714166	635	0.351196	0.390687	0.50537	0.976499
	CCDC178	18	30517366	31021065	319	0.603922	0.200175	0.395286	0.976499
	CCDC180	9	100008467	100139569	321	0.139243	0.719029	0.328068	0.976499
	CCDC23	1	43272723	43282954	431	0.132332	0.784247	0.271845	0.976499
	CCDC30	1	42929001	43120335	340	0.932371	0.38887	0.669316	0.976499
	CCDC53	12	102406705	102455927	453	0.20118	0.691296	0.353999	0.976499
	CCDC6	10	61548521	61666414	578	0.391155	0.908666	0.718847	0.976499
	CCDC62	12	123258874	123312075	308	0.523178	0.239153	0.466789	0.976499
	CCDC64B	16	3077757	3085338	366	0.696746	0.440881	0.642972	0.976499
	CCDC66	3	56591189	56653929	436	0.836771	0.0708515	0.124971	0.976499
	CCDC67	11	93063137	93171653	438	0.284685	0.279892	0.203629	0.976499
	CCDC91	12	28286182	28732883	460	0.240666	0.420441	0.331684	0.976499
	CCDC92	12	124403207	124457378	437	0.484529	0.471222	0.598359	0.976499
	CCHCR1	6	31110216	31126015	176	0.798678	0.137823	0.286652	0.976499
	CCL14	17	34310327	34313569	284	0.0415255	0.0961237	0.0510034	0.976499
	CCL15	17	34323476	34329084	282	0.838541	0.130064	0.324423	0.976499
	CCL16	17	34303529	34308532	286	0.933095	0.0210165	0.0749531	0.976499
	CCL23	17	34340096	34345005	283	0.0755127	0.120012	0.0820906	0.976499
	CCL4	17	34430983	34433014	277	0.326974	0.0670809	0.141963	0.976499
	CCM2	7	45039074	45116068	436	0.669978	0.0851497	0.240565	0.976499
	CCNA1	13	37005967	37017019	490	0.654917	0.210453	0.358491	0.976499
	CCNB1	5	68462837	68474072	314	0.332535	0.605542	0.476213	0.976499
	CCNJ	10	97803151	97820627	501	0.696111	0.388658	0.5455	0.976499
	CCNO	5	54526980	54529508	401	0.394764	0.691994	0.688393	0.976499
	CCNT2	2	135675805	135716912	372	0.0379765	0.912748	0.140597	0.976499
	CCNYL2	10	42903616	42967688	244	0.184461	0.855282	0.450499	0.976499
	CCT6P1	7	65216129	65228341	198	0.462744	0.609699	0.610852	0.976499
	CCT6P3	7	64498738	64535091	247	0.283284	0.277739	0.185518	0.976499
	CCT8	21	30428126	30446118	429	0.0803494	0.90843	0.239701	0.976499
	CCZ1	7	5938365	5964445	342	0.880519	0.314479	0.59665	0.976499
	CCZ1B	7	6833765	6866401	407	0.426056	0.312049	0.404381	0.976499
	CD1B	1	158297741	158301321	517	0.470741	0.450825	0.550156	0.976499
	CD209	19	7804879	7812464	399	0.686394	0.18916	0.340229	0.976499
	CD22	19	35810164	35838258	493	0.654415	0.190824	0.444384	0.976499
	CD27-AS1	12	6548327	6560060	423	0.208317	0.533248	0.279931	0.976499
	CD3EAP	19	45909467	45914024	371	0.884013	0.0694161	0.231213	0.976499
	CD40	20	44746911	44758502	499	0.303892	0.46085	0.433661	0.976499
	CD59	11	33724214	33757991	446	0.591181	0.540405	0.685086	0.976499
	CD79B	17	62006100	62009714	332	0.206864	0.805514	0.447568	0.976499
	CDA	1	20915441	20945401	483	0.527177	0.569162	0.718142	0.976499
	CDAN1	15	43015757	43029324	276	0.515947	0.499215	0.610741	0.976499
	CDC14A	1	100817290	100985833	412	0.876304	0.45314	0.676401	0.976499
	CDC16	13	115000362	115038198	207	0.774285	0.21694	0.48917	0.976499
	CDC20P1	9	89626567	89628066	557	0.0446246	0.742338	0.125832	0.976499
	CDC25B	20	3767578	3786762	515	0.0972977	0.284601	0.161238	0.976499
	CDC26	9	116018115	116035718	607	0.0575641	0.631714	0.17572	0.976499
	CDC37P1	16	28711615	28712861	202	0.664392	0.563297	0.74074	0.976499
	CDC42	1	22379120	22419437	514	0.994098	0.200934	0.507176	0.976499
	CDC7	1	91966408	91991321	539	0.0843323	0.522968	0.169441	0.976499
	CDCA2	8	25316513	25365436	495	0.0605259	0.827396	0.129118	0.976499
	CDH13	16	82660408	83830204	935	0.131178	0.615746	0.322727	0.976499
	CDH6	5	31193857	31329253	621	0.750106	0.127808	0.210887	0.976499
	CDH8	16	61681146	62070939	367	0.138419	0.783404	0.361288	0.976499
	CDHR3	7	105517242	105676877	520	0.728856	0.0974367	0.273601	0.976499
	CDK2AP1	12	123746031	123756881	348	0.54836	0.349171	0.594639	0.976499
	CDK5RAP3	17	46045176	46059138	388	0.14741	0.522808	0.311765	0.976499
	CDNF	10	14861249	14880574	616	0.313129	0.405706	0.456258	0.976499
	CDO1	5	115140430	115152651	536	0.111482	0.708079	0.281271	0.976499
	CDRT4	17	15339332	15406922	401	0.336415	0.345243	0.417879	0.976499
	CEBPD	8	48649471	48651648	138	0.430398	0.595137	0.684107	0.976499
	CEBPG	19	33864236	33873592	471	0.999044	0.0674879	0.180901	0.976499
	CEBPZ	2	37428755	37458773	486	0.0399613	0.659764	0.0875205	0.976499
	CECR1	22	17660194	17702879	533	0.369734	0.327404	0.327705	0.976499
	CECR5	22	17618401	17646158	517	0.627645	0.277039	0.487011	0.976499
	CECR7	22	17517460	17541715	474	0.443008	0.217152	0.230929	0.976499
	CENPA	2	27008865	27023935	386	0.571587	0.496374	0.645933	0.976499
	CENPN	16	81040103	81066719	677	0.678556	0.0441335	0.14505	0.976499
	CENPP	9	95087919	95382815	411	0.0926745	0.182275	0.108601	0.976499
	CENPQ	6	49431091	49460820	347	0.653223	0.438067	0.709303	0.976499
	CENPV	17	16245848	16256813	285	0.26971	0.867704	0.534189	0.976499
	CENPW	6	126661320	126670021	185	0.56684	0.665774	0.747797	0.976499
	CEP170	1	243287730	243418650	285	0.410194	0.528753	0.638045	0.976499
	CEP170B	14	105331617	105363107	343	0.351808	0.406957	0.523099	0.976499
	CEP192	18	12991361	13125051	405	0.452267	0.949041	0.701544	0.976499
	CEP290	12	88444131	88535993	292	0.544227	0.191898	0.376539	0.976499
	CEP44	4	175206585	175254531	447	0.102951	0.669953	0.287454	0.976499
	CEP57	11	95523129	95565857	617	0.736694	0.455704	0.739735	0.976499
	CEP72	5	612387	667283	366	0.897083	0.157745	0.353755	0.976499
	CEP85	1	26560691	26605299	429	0.322884	0.824004	0.596182	0.976499
	CERS5	12	50523575	50561288	310	0.166142	0.433718	0.200059	0.976499
	CES1P1	16	55794460	55828070	552	0.310594	0.792758	0.541778	0.976499
	CFDP1	16	75327596	75467383	349	0.231044	0.553769	0.382933	0.976499
	CFL1P5	5	68609198	68609464	243	0.274073	0.313108	0.327514	0.976499
	CGGBP1	3	88101094	88198892	303	0.0453241	0.497632	0.117075	0.976499
	CHAF1A	19	4402659	4444995	380	0.741287	0.12842	0.338144	0.976499
	CHCHD2	7	56169262	56174269	269	0.517764	0.317283	0.472952	0.976499
	CHCHD5	2	113341817	113346852	447	0.385334	0.394694	0.52679	0.976499
	CHD1L	1	146714291	146767443	407	0.944737	0.0248061	0.0973441	0.976499
	CHKB	22	51017378	51039884	285	0.472915	0.555854	0.542313	0.976499
	CHML	1	241792155	241799232	568	0.186163	0.480626	0.332985	0.976499
	CHMP1A	16	89710839	89724209	431	0.652994	0.568949	0.721789	0.976499
	CHMP3	2	86730554	86790602	336	0.129214	0.614793	0.29238	0.976499
	CHMP6	17	78965398	78983317	444	0.908749	0.325091	0.656217	0.976499
	CHRAC1	8	141521397	141527236	383	0.23997	0.868875	0.554892	0.976499
	CHRFAM7A	15	30653443	30686052	135	0.394445	0.839305	0.715187	0.976499
	CHRNB1	17	7348380	7361026	488	0.625975	0.48087	0.73646	0.976499
	CHST12	7	2443223	2474242	426	0.882244	0.229414	0.399068	0.976499
	CHST13	3	126243126	126262134	535	0.450497	0.91222	0.732672	0.976499
	CHST2	3	142838173	142841800	550	0.0851046	0.0978872	0.0861992	0.976499
	CHST5	16	75562433	75569145	382	0.493937	0.39587	0.551571	0.976499
	CHST8	19	34112861	34264414	475	0.842629	0.278365	0.51573	0.976499
	CIB2	15	78397252	78423839	414	0.476356	0.325001	0.474113	0.976499
	CICP14	7	128296016	128298845	366	0.600147	0.220523	0.434974	0.976499
	CISD2	4	103790135	103810399	326	0.610774	0.0740964	0.216486	0.976499
	CKAP2	13	53029564	53050763	362	0.398061	0.832209	0.709615	0.976499
	CKMT1A	15	43985084	43991420	260	0.161358	0.99204	0.363281	0.976499
	CKMT2-AS1	5	80499903	80597379	464	0.0629688	0.916908	0.168499	0.976499
	CLCN7	16	1494935	1525581	489	0.0284569	0.225846	0.0373473	0.976499
	CLDN10	13	96085858	96230456	665	0.267843	0.735516	0.566022	0.976499
	CLEC12A	12	10124014	10138194	338	0.267982	0.804334	0.572912	0.976499
	CLEC12B	12	10163226	10171218	347	0.293556	0.827269	0.613282	0.976499
	CLEC18A	16	69984810	69998141	209	0.615486	0.122941	0.298038	0.976499
	CLEC4F	2	71035775	71047732	555	0.332276	0.579042	0.53143	0.976499
	CLEC4M	19	7828035	7834491	418	0.351294	0.321343	0.397872	0.976499
	CLHC1	2	55401927	55459490	506	0.470805	0.625239	0.715458	0.976499
	CLIC1	6	31698395	31707540	244	0.62392	0.415045	0.625138	0.976499
	CLIC6	21	36041688	36090525	572	0.791051	0.0387882	0.098015	0.976499
	CLK4	5	178029665	178054115	574	0.217648	0.515029	0.381766	0.976499
	CLN5	13	77564795	77576652	450	0.0762859	0.245678	0.132724	0.976499
	CLPP	19	6361463	6368919	404	0.588447	0.0417857	0.128201	0.976499
	CLPSL1	6	35748794	35761452	415	0.166647	0.906942	0.389508	0.976499
	CLTCL1	22	19166986	19279239	488	0.177797	0.473189	0.277637	0.976499
	CLUHP3	16	31711911	31721097	209	0.716393	0.445465	0.723664	0.976499
	CMAHP	6	25081548	25166793	618	0.241488	0.109619	0.130955	0.976499
	CMTR2	16	71315292	71323618	271	0.360338	0.726697	0.594467	0.976499
	CNGA1	4	47937994	48018689	407	0.581319	0.218015	0.412635	0.976499
	CNOT6L	4	78634541	78740769	432	0.953335	0.273646	0.539506	0.976499
	CNPY4	7	99717236	99723134	279	0.315268	0.121684	0.2325	0.976499
	CNTLN	9	17134980	17503921	546	0.454537	0.655111	0.69718	0.976499
	COA1	7	43648055	43769316	411	0.122431	0.132636	0.141744	0.976499
	COG4	16	70514471	70557468	159	0.64383	0.319573	0.585815	0.976499
	COG6	13	40229764	40365802	526	0.696452	0.419121	0.574668	0.976499
	COL21A1	6	55921388	56258892	424	0.023761	0.894044	0.0783783	0.976499
	COL24A1	1	86194916	86622626	485	0.504227	0.0425394	0.08035	0.976499
	COL26A1	7	101006101	101202304	347	0.254088	0.205708	0.262594	0.976499
	COL6A1	21	47401651	47424964	471	0.108933	0.779971	0.30104	0.976499
	COLQ	3	15491640	15563258	383	0.640477	0.440937	0.602619	0.976499
	COMMD2	3	149456257	149470286	478	0.204819	0.0501175	0.0776685	0.976499
	COMMD7	20	31290493	31331803	418	0.498865	0.0595186	0.147936	0.976499
	COPRS	17	30178883	30186356	323	0.319367	0.876051	0.634162	0.976499
	COQ4	9	131085022	131096351	293	0.135609	0.867278	0.274829	0.976499
	COQ5	12	120941077	120972153	408	0.575952	0.329131	0.465772	0.976499
	COQ6	14	74416629	74428606	411	0.801804	0.254387	0.561796	0.976499
	COQ7	16	19079014	19091417	382	0.470482	0.454036	0.621628	0.976499
	COQ9	16	57481441	57495187	582	0.790776	0.27229	0.590342	0.976499
	COX11	17	53029263	53046125	500	0.251795	0.825248	0.469014	0.976499
	COX16	14	70791798	70826448	568	0.604024	0.41966	0.574229	0.976499
	COX6B1P4	8	26693334	26693817	659	0.380898	0.383068	0.423565	0.976499
	COX6C	8	100885428	100906290	353	0.548536	0.646395	0.737096	0.976499
	CPE	4	166282346	166419472	449	0.19743	0.165902	0.1641	0.976499
	CPEB3	10	93806449	94050844	303	0.142292	0.822486	0.269028	0.976499
	CPQ	8	97657455	98161882	405	0.537581	0.353231	0.495842	0.976499
	CPS1	2	211342406	211543831	346	0.895985	0.0907138	0.281916	0.976499
	CPSF3	2	9563697	9613230	433	0.551752	0.205833	0.41939	0.976499
	CPSF3L	1	1247058	1260071	261	0.447332	0.868581	0.744488	0.976499
	CPSF4L	17	71245932	71258491	592	0.34907	0.708419	0.591398	0.976499
	CPT1B	22	51007290	51017096	296	0.476589	0.698141	0.694324	0.976499
	CPVL	7	29034847	29235067	694	0.0985475	0.842964	0.245648	0.976499
	CREBRF	5	172483355	172566291	558	0.49035	0.922493	0.736684	0.976499
	CREG1	1	167498914	167523004	600	0.311288	0.365059	0.455749	0.976499
	CRELD2	22	50311815	50321188	429	0.0507611	0.623523	0.159543	0.976499
	CRHR1	17	43699267	43913194	92	0.135467	0.973717	0.371125	0.976499
	CRHR2	7	30692200	30728900	475	0.988986	0.371937	0.631557	0.976499
	CRIPT	2	46844290	46852881	666	0.703634	0.316119	0.618322	0.976499
	CROCC	1	17066768	17299474	279	0.324576	0.262058	0.311117	0.976499
	CROCCP2	1	16944751	16961054	263	0.652018	0.0763882	0.227318	0.976499
	CRTAP	3	33155471	33189265	365	0.337505	0.762546	0.544502	0.976499
	CRYBB3	22	25595817	25603330	456	0.0676378	0.996815	0.231557	0.976499
	CRYL1	13	20977806	21099996	501	0.286544	0.875072	0.592586	0.976499
	CRYZ	1	75171170	75198835	383	0.184497	0.565832	0.404975	0.976499
	CSGALNACT1	8	19261672	19615540	673	0.94571	0.0199265	0.0710013	0.976499
	CSPG4P11	15	84855504	84866136	253	0.645605	0.128436	0.264303	0.976499
	CSTB	21	45192393	45196326	452	0.498177	0.652035	0.709809	0.976499
	CTA-212D2.2	6	135376171	135381688	368	0.12766	0.070672	0.0717618	0.976499
	CTA-228A9.3	22	38486134	38487566	355	0.287265	0.227594	0.325539	0.976499
	CTA-292E10.8	22	29210902	29211650	331	0.116747	0.0758735	0.050757	0.976499
	CTA-29F11.1	22	47157791	47158460	571	0.579291	0.570508	0.732477	0.976499
	CTA-363E6.6	16	19488238	19499221	460	0.0899412	0.943383	0.18659	0.976499
	CTA-384D8.36	22	50962854	50963209	321	0.353567	0.626731	0.545248	0.976499
	CTA-390C10.10	22	25872185	25875938	520	0.590466	0.455542	0.690378	0.976499
	CTA-85E5.10	22	30404731	30476162	411	0.965391	0.150578	0.355764	0.976499
	CTAGE8	7	143963794	143966381	320	0.644622	0.380954	0.66438	0.976499
	CTB-109A12.1	5	156789623	156887026	522	0.843518	0.450414	0.688196	0.976499
	CTB-113P19.3	5	151133553	151146808	567	0.374302	0.138533	0.19778	0.976499
	CTB-113P19.4	5	151031836	151035010	573	0.687947	0.198993	0.370597	0.976499
	CTB-12O2.1	5	151329132	151650009	530	0.570992	0.249744	0.335679	0.976499
	CTB-161M19.4	5	118342042	118406585	377	0.490186	0.627743	0.71368	0.976499
	CTB-171A8.1	19	45135500	45222031	435	0.0657856	0.0649213	0.0376721	0.976499
	CTB-36H16.2	5	122168051	122170228	446	0.118875	0.881112	0.350917	0.976499
	CTB-47B11.3	5	156802749	156811958	507	0.650126	0.45964	0.61949	0.976499
	CTB-50L17.9	19	4454791	4455217	394	0.770778	0.0215363	0.075903	0.976499
	CTB-78O21.1	5	145107923	145108912	382	0.182548	0.856173	0.431138	0.976499
	CTC-228N24.3	5	127276118	127418864	379	0.27506	0.682839	0.445537	0.976499
	CTC-236F12.4	5	55753622	55777596	546	0.0252726	0.974219	0.0601672	0.976499
	CTC-281F24.1	17	6556792	6558328	567	0.0365598	0.446023	0.0736647	0.976499
	CTC-297N7.1	17	10561859	10562399	525	0.668338	0.378634	0.637856	0.976499
	CTC-297N7.5	17	10633094	10718481	497	0.260582	0.330443	0.395174	0.976499
	CTC-297N7.8	17	10575791	10579323	514	0.575249	0.303064	0.523441	0.976499
	CTC-360G5.9	19	39425976	39429272	399	0.541268	0.514435	0.68736	0.976499
	CTC-459F4.1	19	28248092	28251757	279	0.446226	0.643824	0.5952	0.976499
	CTC-459F4.3	19	28284371	28409771	289	0.438625	0.56204	0.552535	0.976499
	CTC-462L7.1	17	53246184	53250993	541	0.364885	0.355637	0.403358	0.976499
	CTC-471C19.1	5	6019142	6022396	611	0.54627	0.34868	0.52266	0.976499
	CTC-523E23.11	19	35340182	35351480	459	0.0965392	0.532698	0.187358	0.976499
	CTC-523E23.5	19	35328793	35346208	443	0.772073	0.280133	0.530448	0.976499
	CTC-559E9.6	19	19887411	19945736	302	0.4652	0.198402	0.386591	0.976499
	CTD-2006C1.2	19	12098432	12157090	315	0.733411	0.386323	0.590168	0.976499
	CTD-2007H13.3	5	98264875	98330717	346	0.209769	0.466973	0.35907	0.976499
	CTD-2012J19.3	5	1594741	1611582	566	0.339151	0.6247	0.419799	0.976499
	CTD-2017D11.1	19	24216247	24249711	169	0.270104	0.322067	0.348895	0.976499
	CTD-2054N24.2	15	100347228	100417353	540	0.319835	0.317333	0.353161	0.976499
	CTD-2162K18.4	19	37264055	37267980	274	0.182697	0.332108	0.317557	0.976499
	CTD-2192J16.11	19	12663411	12664458	286	0.441237	0.0973464	0.117404	0.976499
	CTD-2192J16.21	19	12640582	12643787	281	0.955988	0.137769	0.300625	0.976499
	CTD-2196P11.2	5	38682172	38685228	461	0.929045	0.148305	0.411264	0.976499
	CTD-2203K17.1	5	33424131	33440725	480	0.16198	0.480075	0.317964	0.976499
	CTD-2227C6.2	5	82308104	82308928	405	0.510669	0.359639	0.584138	0.976499
	CTD-2228K2.7	5	473351	480780	325	0.337969	0.27152	0.274104	0.976499
	CTD-2245F17.3	19	53700364	53714268	475	0.845702	0.0783753	0.252577	0.976499
	CTD-2248H3.1	5	80538149	80538418	447	0.213785	0.843818	0.394227	0.976499
	CTD-2256P15.4	5	10264709	10267258	606	0.538732	0.334676	0.472254	0.976499
	CTD-2258A20.5	16	66503769	66513034	490	0.19948	0.781191	0.38859	0.976499
	CTD-2260A17.1	5	96120481	96121703	502	0.810965	0.173981	0.41178	0.976499
	CTD-2260A17.3	5	96140056	96141808	501	0.160333	0.159564	0.14883	0.976499
	CTD-2262B20.1	15	85958459	85958864	540	0.440731	0.547158	0.653633	0.976499
	CTD-2287O16.5	5	115419504	115421113	593	0.446399	0.731471	0.741141	0.976499
	CTD-2292P10.4	8	143786546	143808391	406	0.476416	0.205593	0.303947	0.976499
	CTD-2301A4.5	5	176692713	176693337	322	0.426185	0.347122	0.31375	0.976499
	CTD-2303H24.2	17	18424439	18437376	290	0.0293824	0.540255	0.0837439	0.976499
	CTD-2324F15.2	5	6310554	6339997	636	0.404559	0.056701	0.135993	0.976499
	CTD-2325M2.1	19	8073613	8080909	435	0.531358	0.233713	0.30479	0.976499
	CTD-2325P2.4	14	69093883	69095162	612	0.836871	0.261915	0.445352	0.976499
	CTD-2336O2.1	8	1710156	1712668	733	0.149188	0.891126	0.343083	0.976499
	CTD-2349P21.9	17	29119390	29119851	269	0.374159	0.980231	0.705186	0.976499
	CTD-2368P22.1	19	58513429	58522600	453	0.275322	0.453189	0.455821	0.976499
	CTD-2516F10.2	11	7448497	7533746	663	0.466757	0.47796	0.59446	0.976499
	CTD-2538C1.2	19	33177995	33182656	404	0.161613	0.0298109	0.0480147	0.976499
	CTD-2540L5.6	14	71075515	71108015	434	0.403086	0.69631	0.679954	0.976499
	CTD-2541M15.4	8	6503576	6505803	871	0.512493	0.107365	0.267677	0.976499
	CTD-2547L24.3	14	91709103	91717426	384	0.0512275	0.723485	0.130694	0.976499
	CTD-2561J22.5	19	21627043	21646710	299	0.276954	0.211033	0.280147	0.976499
	CTD-2587M2.1	5	108572821	108662070	373	0.0756664	0.078425	0.0703485	0.976499
	CTD-2589H19.6	5	675941	676731	348	0.47155	0.304384	0.459956	0.976499
	CTD-2619J13.19	19	58951815	58957216	302	0.549864	0.520195	0.594599	0.976499
	CTD-2651B20.1	15	45444862	45445415	307	0.396181	0.777324	0.711146	0.976499
	CTD-3025N20.3	8	66504085	66504707	360	0.638148	0.460174	0.608688	0.976499
	CTD-3065B20.2	15	91139072	91139679	464	0.503622	0.539547	0.528691	0.976499
	CTD-3074O7.5	11	66240961	66245567	282	0.5367	0.010393	0.0350657	0.976499
	CTD-3080P12.3	5	1173256	1178720	367	0.94064	0.29198	0.575146	0.976499
	CTD-3092A11.1	15	30762982	30799826	133	0.547423	0.140959	0.193534	0.976499
	CTD-3092A11.2	15	30780166	30782516	130	0.877863	0.268417	0.566767	0.976499
	CTD-3107M8.2	8	30207382	30207863	356	0.253467	0.858351	0.543799	0.976499
	CTD-3110H11.1	15	50651647	50652391	414	0.763195	0.0925612	0.244889	0.976499
	CTD-3131K8.2	19	17599799	17622437	421	0.844019	0.111003	0.252165	0.976499
	CTD-3138B18.5	19	58768639	58790174	351	0.916756	0.351544	0.710433	0.976499
	CTD-3179P9.1	5	117260703	117601730	384	0.221191	0.824308	0.496717	0.976499
	CTD-3199J23.6	17	41297131	41297272	288	0.27205	0.485367	0.384647	0.976499
	CTD-3214H19.6	19	7698652	7701766	412	0.831756	0.205758	0.402511	0.976499
	CTGLF10P	10	46174140	46195980	194	0.957879	0.00957038	0.0400819	0.976499
	CTGLF12P	10	49217898	49239729	168	0.504883	0.354406	0.535225	0.976499
	CTNNAL1	9	111704851	111775809	621	0.308957	0.269002	0.357513	0.976499
	CTNS	17	3539762	3564836	531	0.24184	0.665188	0.35779	0.976499
	CTSB	8	11700033	11726957	422	0.850008	0.370028	0.677671	0.976499
	CTSF	11	66330934	66336312	256	0.0397106	0.48946	0.0991983	0.976499
	CTSS	1	150702672	150738433	304	0.112783	0.417456	0.219357	0.976499
	CUL7	6	43005355	43021683	368	0.089473	0.341996	0.0667747	0.976499
	CWC15	11	94695787	94706776	506	0.464538	0.366685	0.463215	0.976499
	CWF19L1	10	101992055	102027437	401	0.135979	0.208904	0.169009	0.976499
	CWF19L2	11	107197071	107328572	470	0.0509358	0.0880519	0.0484916	0.976499
	CXCL6	4	74702214	74714781	314	0.647995	0.310811	0.547541	0.976499
	CYB561D2	3	50388523	50395643	335	0.344826	0.209452	0.265035	0.976499
	CYB5D2	17	4046462	4090605	472	0.30529	0.626015	0.543447	0.976499
	CYB5RL	1	54638009	54665709	490	0.0756846	0.861087	0.228195	0.976499
	CYP21A1P	6	31973466	31976176	197	0.428454	0.751973	0.743026	0.976499
	CYP21A2	6	32006042	32009447	189	0.410136	0.868171	0.745088	0.976499
	CYP27C1	2	127941696	127977654	470	0.545892	0.694031	0.736753	0.976499
	CYP2D6	22	42522501	42526908	358	0.718508	0.485944	0.708027	0.976499
	CYP2D8P1	22	42545877	42551007	368	0.451742	0.849124	0.730014	0.976499
	CYP2W1	7	1022835	1029276	357	0.277745	0.68067	0.518442	0.976499
	CYP4A11	1	47394849	47407156	380	0.449343	0.0427062	0.0715938	0.976499
	CYP4B1	1	47223510	47285085	389	0.361301	0.414894	0.491371	0.976499
	CYP4F11	19	16023177	16045677	543	0.260135	0.641862	0.377986	0.976499
	CYP4F12	19	15783567	15807984	529	0.244887	0.576953	0.472185	0.976499
	CYP4F32P	2	95425004	95426024	65	0.396592	0.386626	0.393035	0.976499
	CYP4F34P	13	19315870	19316858	215	0.0653977	0.351053	0.135153	0.976499
	CYP4V2	4	187112674	187134610	582	0.705808	0.251857	0.407307	0.976499
	CYP8B1	3	42897497	42917633	414	0.336745	0.994596	0.688734	0.976499
	CYTH2	19	48972951	48983103	530	0.0420241	0.421267	0.0681264	0.976499
	D2HGDH	2	242673994	242708226	223	0.498864	0.315424	0.515617	0.976499
	DAGLB	7	6448760	6487643	304	0.210329	0.283276	0.26321	0.976499
	DAP	5	10679342	10761384	630	0.778643	0.332122	0.536075	0.976499
	DAPK1	9	90112143	90323548	616	0.755631	0.182359	0.392084	0.976499
	DAPP1	4	100737990	100791311	461	0.648104	0.0693495	0.156503	0.976499
	DBH-AS1	9	136519708	136522435	611	0.245232	0.0566294	0.112955	0.976499
	DBNDD1	16	90071273	90086451	277	0.327631	0.86984	0.671121	0.976499
	DBNL	7	44084239	44109055	343	0.284494	0.0618244	0.123601	0.976499
	DCAF10	9	37800499	37867663	495	0.136659	0.389314	0.193099	0.976499
	DCAF16	4	17802278	17812381	380	0.34332	0.995855	0.586733	0.976499
	DCAKD	17	43100708	43138473	326	0.204525	0.987274	0.521096	0.976499
	DCK	4	71858255	71896631	306	0.0786556	0.870153	0.252138	0.976499
	DCLK2	4	150999426	151178609	392	0.972961	0.347592	0.710148	0.976499
	DCLRE1B	1	114447824	114456708	468	0.140942	0.522891	0.290652	0.976499
	DCP2	5	112312399	112356667	501	0.0478799	0.532715	0.123449	0.976499
	DCTN4	5	150088002	150138671	497	0.0617972	0.889569	0.166401	0.976499
	DCTN5	16	23652713	23681195	437	0.702647	0.5611	0.748695	0.976499
	DCUN1D4	4	52709166	52783003	156	0.203376	0.160838	0.179372	0.976499
	DDI2	1	15943995	15995539	477	0.201969	0.457537	0.317868	0.976499
	DDO	6	110712974	110736765	410	0.465069	0.67393	0.717059	0.976499
	DDRGK1	20	3170996	3185331	437	0.929935	0.0208427	0.072475	0.976499
	DDT	22	24315293	24322660	402	0.0668359	0.332576	0.102651	0.976499
	DDTL	22	24309089	24314721	408	0.265795	0.239586	0.239447	0.976499
	DDX11-AS1	12	31173697	31226778	458	0.679056	0.301392	0.555248	0.976499
	DDX11L2	2	114356656	114359144	353	0.83562	0.0666556	0.217724	0.976499
	DDX17	22	38879453	38903665	368	0.665271	0.213457	0.469091	0.976499
	DDX18	2	118572226	118589955	471	0.0305702	0.980395	0.0720423	0.976499
	DDX20	1	112297867	112310638	685	0.0483525	0.191225	0.0538284	0.976499
	DDX31	9	135468384	135545421	539	0.378268	0.17449	0.186393	0.976499
	DDX51	12	132621139	132628880	279	0.111672	0.649408	0.282281	0.976499
	DDX55	12	124086646	124104952	381	0.193732	0.394733	0.336871	0.976499
	DDX56	7	44605016	44614650	365	0.350718	0.0120404	0.0358736	0.976499
	DDX60L	4	169277886	169458937	528	0.670552	0.195638	0.424175	0.976499
	DEFB1	8	6728097	6735544	655	0.566294	0.0542225	0.164767	0.976499
	DENND4B	1	153901977	153919172	326	0.513238	0.526883	0.699842	0.976499
	DET1	15	89054790	89089906	465	0.421219	0.102828	0.193932	0.976499
	DFNA5	7	24737972	24809244	631	0.5688	0.0889222	0.224811	0.976499
	DGCR11	22	19033675	19035888	440	0.953995	0.0691143	0.180186	0.976499
	DGCR2	22	19023795	19109967	423	0.900219	0.0763952	0.18492	0.976499
	DGCR9	22	19005347	19007761	445	0.777463	0.0734991	0.174034	0.976499
	DHFR	5	79922047	79950802	481	0.636413	0.340699	0.481584	0.976499
	DHPS	19	12786647	12792716	299	0.513112	0.20543	0.357565	0.976499
	DHRS1	14	24759804	24769039	496	0.208169	0.526894	0.396799	0.976499
	DHRS4-AS1	14	24409197	24458026	506	0.0415524	0.76173	0.136641	0.976499
	DHRS4L2	14	24439148	24475617	494	0.0655891	0.711157	0.174502	0.976499
	DHRS7	14	60610838	60636574	293	0.50753	0.315878	0.476268	0.976499
	DHX34	19	47852538	47885961	353	0.212108	0.376101	0.334603	0.976499
	DHX36	3	153990335	154042286	328	0.287112	0.549891	0.474107	0.976499
	DHX37	12	125431373	125473667	542	0.369388	0.401241	0.407589	0.976499
	DHX57	2	39024871	39103075	321	0.544223	0.298506	0.420738	0.976499
	DHX58	17	40253422	40264751	320	0.34696	0.39576	0.384583	0.976499
	DIEXF	1	210001352	210030910	525	0.474314	0.307121	0.518648	0.976499
	DIP2A	21	47878812	47989926	370	0.512385	0.446222	0.586139	0.976499
	DIP2B	12	50898890	51142450	296	0.585272	0.0483285	0.135947	0.976499
	DIRC1	2	189598882	189654831	280	0.23005	0.400567	0.351082	0.976499
	DIS3L	15	66585555	66626236	490	0.804798	0.326733	0.556165	0.976499
	DISC1	1	231762561	232177018	484	0.631147	0.354767	0.473192	0.976499
	DISP2	15	40650436	40663257	399	0.353188	0.842013	0.688305	0.976499
	DLGAP1-AS1	18	3593730	3598350	549	0.522743	0.597334	0.667874	0.976499
	DLGAP2	8	1449532	1656642	670	0.34766	0.420036	0.383869	0.976499
	DLX3	17	48067369	48072588	423	0.0488913	0.15996	0.0688514	0.976499
	DMPK	19	46273065	46285810	391	0.285666	0.140288	0.230438	0.976499
	DMWD	19	46286205	46296060	400	0.548648	0.137062	0.331249	0.976499
	DNA2	10	70173821	70231879	384	0.463275	0.505269	0.615639	0.976499
	DNAAF3	19	55670031	55678090	459	0.463943	0.36563	0.546563	0.976499
	DNAH1	3	52350335	52434507	357	0.715508	0.205942	0.380683	0.976499
	DNAH10OS	12	124410971	124419531	428	0.490125	0.557674	0.603454	0.976499
	DNAH5	5	13690440	13944652	600	0.541036	0.38039	0.584241	0.976499
	DNAH7	2	196602427	196933536	388	0.528999	0.571576	0.713894	0.976499
	DNAJA4	15	78556499	78574538	407	0.646316	0.422155	0.702548	0.976499
	DNAJB12	10	74092588	74114988	364	0.649173	0.0713734	0.132995	0.976499
	DNAJB14	4	100817405	100867883	417	0.181535	0.0237229	0.0364893	0.976499
	DNAJC3	13	96329393	96447243	508	0.214846	0.539514	0.326913	0.976499
	DNAJC3-AS1	13	96300987	96329179	508	0.433982	0.60136	0.574843	0.976499
	DNASE1L3	3	58177984	58200424	447	0.341654	0.509558	0.520232	0.976499
	DND1P1	17	43663237	43664295	120	0.156685	0.909933	0.38211	0.976499
	DNM1P46	15	100330361	100347132	541	0.3166	0.388686	0.430507	0.976499
	DNM1P47	15	102291235	102334505	371	0.0789942	0.29651	0.163516	0.976499
	DNM1P51	15	84953014	84966399	313	0.941255	0.311398	0.596021	0.976499
	DNTTIP1	20	44420576	44440066	530	0.149611	0.0451748	0.0682292	0.976499
	DOC2B	17	5810	31427	194	0.413765	0.279658	0.342118	0.976499
	DOCK9-AS2	13	99740073	99740879	547	0.0279656	0.405802	0.0812014	0.976499
	DOK3	5	176928908	176938275	259	0.380969	0.443525	0.511098	0.976499
	DOPEY1	6	83777385	83881069	352	0.48948	0.224591	0.231024	0.976499
	DOPEY2	21	37529080	37666572	508	0.899441	0.452517	0.716794	0.976499
	DPH1	17	1933404	1945898	465	0.769113	0.254782	0.489376	0.976499
	DPH7	9	140449356	140473387	348	0.191853	0.54777	0.354971	0.976499
	DPP3	11	66247484	66277130	280	0.474445	0.00931056	0.0344001	0.976499
	DPP7	9	140004994	140009629	370	0.974579	0.158565	0.298456	0.976499
	DPT	1	168664697	168698502	583	0.527126	0.639474	0.688526	0.976499
	DPY19L1P1	7	32620561	32801399	408	0.753015	0.181539	0.43846	0.976499
	DPY19L1P2	7	32852369	32878182	392	0.271359	0.402527	0.442389	0.976499
	DPY19L2	12	63952693	64062629	331	0.558403	0.27385	0.487068	0.976499
	DPY30	2	32236955	32264881	262	0.103177	0.606176	0.185903	0.976499
	DPYD	1	97543299	98386605	408	0.205102	0.167819	0.221993	0.976499
	DPYSL4	10	134000404	134019280	464	0.114995	0.897238	0.326291	0.976499
	DR1	1	93811583	93835055	299	0.0896569	0.764501	0.269169	0.976499
	DRAM2	1	111659955	111682838	579	0.796563	0.0709056	0.12953	0.976499
	DRD4	11	637293	640706	471	0.277507	0.909535	0.582996	0.976499
	DRG2	17	17991200	18011285	334	0.707516	0.209623	0.346407	0.976499
	DROSHA	5	31400604	31532303	676	0.94025	0.19836	0.386085	0.976499
	DSCAML1	11	117298489	117688240	683	0.511138	0.426023	0.636648	0.976499
	DSTYK	1	205111632	205180727	596	0.727109	0.137788	0.274413	0.976499
	DTD1	20	18568537	18744561	484	0.239334	0.737921	0.503949	0.976499
	DUS3L	19	5784843	5791249	393	0.958023	0.341906	0.697203	0.976499
	DUSP18	22	31048038	31063587	450	0.554708	0.27453	0.39669	0.976499
	DUTP6	1	166837985	166838446	590	0.381835	0.95572	0.712094	0.976499
	DYNC2LI1	2	44001178	44037149	473	0.674513	0.141486	0.364158	0.976499
	DZIP1L	3	137780832	137834660	355	0.398144	0.730442	0.651612	0.976499
	EARS2	16	23533335	23568391	430	0.71232	0.366752	0.614598	0.976499
	EBPL	13	50234859	50265611	398	0.763279	0.265694	0.44873	0.976499
	EDEM2	20	33703167	33735167	345	0.103999	0.215164	0.171518	0.976499
	EDEM3	1	184659365	184724047	426	0.800367	0.213717	0.510521	0.976499
	EEFSEC	3	127965679	128127485	377	0.402065	0.043689	0.119651	0.976499
	EFCAB1	8	49623348	49647870	292	0.0482315	0.364913	0.0590065	0.976499
	EFCAB13	17	45400656	45518678	346	0.494341	0.282774	0.418676	0.976499
	EFHB	3	19920964	19988517	381	0.38112	0.669633	0.60371	0.976499
	EFHD1	2	233470767	233547491	456	0.375764	0.714277	0.651989	0.976499
	EFNB3	17	7608520	7614696	512	0.401147	0.444094	0.557493	0.976499
	EHBP1	2	62900986	63273616	318	0.303747	0.993968	0.660741	0.976499
	EHD4	15	42190950	42264776	433	0.486722	0.344369	0.45674	0.976499
	EIF2A	3	150270141	150302029	435	0.173621	0.0574888	0.0738273	0.976499
	EIF2AK4	15	40226347	40327797	465	0.957124	0.30037	0.639723	0.976499
	EIF2B2	14	75469614	75476292	414	0.181274	0.983225	0.433076	0.976499
	EIF2S2P3	10	94428502	94429500	392	0.496523	0.129445	0.246328	0.976499
	EIF3B	7	2393721	2420380	415	0.560409	0.171679	0.248923	0.976499
	EIF3KP1	5	102368080	102368735	310	0.646892	0.569739	0.742888	0.976499
	EIF4B	12	53399942	53435993	596	0.0422942	0.358755	0.0933751	0.976499
	EIF4BP3	9	98908289	98910138	463	0.257847	0.610712	0.369185	0.976499
	EIF4E3	3	71724567	71802775	559	0.456081	0.610738	0.574993	0.976499
	EIF4G2	11	10818597	10830657	696	0.03771	0.526936	0.0582233	0.976499
	EIF5A	17	7210318	7215774	458	0.312092	0.689626	0.528572	0.976499
	ELAC2	17	12895708	12921504	570	0.217977	0.0327502	0.0565407	0.976499
	ELAVL2	9	23690102	23826335	408	0.424789	0.786896	0.714503	0.976499
	ELOVL4	6	80624529	80657297	474	0.726371	0.0947994	0.265236	0.976499
	ELP3	8	27947190	28048673	570	0.905671	0.168314	0.441594	0.976499
	EMC1	1	19542158	19578032	506	0.547896	0.294861	0.412448	0.976499
	EMC9	14	24608177	24610797	519	0.863209	0.295186	0.609007	0.976499
	EME2	16	1823208	1831709	475	0.254991	0.202647	0.138073	0.976499
	ENAH	1	225674537	225840844	421	0.295539	0.0621544	0.0926154	0.976499
	ENC1	5	73923234	73937249	540	0.0521925	0.426123	0.126368	0.976499
	ENOSF1	18	672546	712676	626	0.42108	0.396795	0.548561	0.976499
	ENOX1	13	43787654	44361044	532	0.821858	0.0899867	0.236634	0.976499
	ENPP4	6	46097730	46114436	507	0.472304	0.437995	0.570879	0.976499
	ENPP7P11	4	9678932	9679558	356	0.72766	0.095124	0.230366	0.976499
	ENPP7P2	3	75495920	75540353	137	0.269947	0.0415687	0.0961363	0.976499
	ENTPD3-AS1	3	40355293	40494820	345	0.112273	0.735782	0.28979	0.976499
	EP300	22	41487790	41576081	276	0.5442	0.0886787	0.173546	0.976499
	EP400NL	12	132568828	132613029	319	0.655532	0.290341	0.528829	0.976499
	EPB41L4A	5	111478138	111755013	413	0.725884	0.0975088	0.282733	0.976499
	EPHB1	3	134316643	134979309	456	0.139708	0.991724	0.402326	0.976499
	EPS15	1	51819935	51985000	208	0.310115	0.820561	0.581119	0.976499
	ERAP1	5	96096521	96143803	501	0.123254	0.166945	0.149797	0.976499
	ERAP2	5	96211643	96255420	507	0.418082	0.22044	0.400029	0.976499
	ERCC2	19	45853095	45874176	370	0.323004	0.142894	0.17209	0.976499
	ERCC6	10	50663414	50747584	416	0.131055	0.381394	0.252446	0.976499
	ERCC6L2	9	98638260	98776842	531	0.250909	0.18326	0.207966	0.976499
	ERI2	16	20791515	20907703	338	0.218354	0.747462	0.474574	0.976499
	ERMAP	1	43282795	43310660	431	0.0168877	0.441382	0.0508266	0.976499
	ERMARD	6	170151718	170181680	477	0.0681315	0.101893	0.0510112	0.976499
	ERP27	12	15066969	15092016	386	0.26069	0.610008	0.500743	0.976499
	ERV3-1	7	64451415	64467121	255	0.337345	0.236279	0.211754	0.976499
	ERVK13-1	16	2710350	2723445	307	0.43161	0.439213	0.534918	0.976499
	ESPN	1	6484848	6521040	413	0.0998703	0.47622	0.207955	0.976499
	ETFDH	4	159593408	159630285	273	0.429399	0.295785	0.473273	0.976499
	ETHE1	19	44010871	44031396	382	0.851132	0.0127629	0.036652	0.976499
	EVI5	1	92974253	93257961	273	0.0865713	0.303058	0.135106	0.976499
	EVI5L	19	7895119	7929862	443	0.217078	0.60171	0.353456	0.976499
	EXOC3	5	443273	470102	315	0.986833	0.178013	0.360626	0.976499
	EXOG	3	38537618	38583437	443	0.254656	0.963654	0.583263	0.976499
	EXOSC1	10	99195899	99205774	508	0.55736	0.404009	0.628104	0.976499
	EXOSC4	8	145134326	145135550	235	0.706054	0.111063	0.261645	0.976499
	EXOSC6	16	70284134	70285833	202	0.538497	0.190091	0.399291	0.976499
	EXT2	11	44117099	44266979	556	0.793863	0.577184	0.737255	0.976499
	EYA1	8	72109668	72274467	547	0.309983	0.484927	0.510341	0.976499
	EYA3	1	28296855	28415207	259	0.0647846	0.324155	0.111898	0.976499
	F10	13	113777128	113803843	443	0.391793	0.47654	0.574396	0.976499
	F2R	5	76011868	76031606	586	0.791444	0.126531	0.353597	0.976499
	F7	13	113760105	113774995	448	0.557202	0.418307	0.62687	0.976499
	FADS2	11	61583728	61634826	427	0.0842353	0.653469	0.221962	0.976499
	FAHD1	16	1877196	1890208	476	0.338407	0.367815	0.438018	0.976499
	FAM106A	17	18427880	18430160	292	0.0433333	0.477363	0.110142	0.976499
	FAM107A	3	58549844	58613337	385	0.136638	0.170344	0.172625	0.976499
	FAM114A1	4	38869298	38947360	510	0.633225	0.395579	0.561218	0.976499
	FAM124B	2	225243415	225266802	442	0.0763104	0.966032	0.245988	0.976499
	FAM134A	2	220041054	220050201	375	0.418694	0.666322	0.670167	0.976499
	FAM149A	4	187025573	187093821	592	0.497553	0.384059	0.51498	0.976499
	FAM153B	5	175487692	175559261	314	0.333961	0.964527	0.682182	0.976499
	FAM160A1	4	152330368	152584784	308	0.990117	0.428458	0.72181	0.976499
	FAM166B	9	35561896	35563896	382	0.628232	0.0815994	0.236586	0.976499
	FAM170A	5	118965254	118971517	376	0.0473125	0.910978	0.170989	0.976499
	FAM171B	2	187558698	187630685	267	0.448121	0.365617	0.495996	0.976499
	FAM173B	5	10226442	10244612	606	0.746874	0.296928	0.524235	0.976499
	FAM179A	2	29179477	29284239	596	0.541422	0.713788	0.711869	0.976499
	FAM181B	11	82443053	82444906	442	0.17937	0.11812	0.109315	0.976499
	FAM182B	20	25744102	25848861	157	0.410198	0.905611	0.741947	0.976499
	FAM184A	6	119280928	119470552	422	0.331174	0.725046	0.560466	0.976499
	FAM192A	16	57186378	57220028	536	0.160594	0.219002	0.184269	0.976499
	FAM19A2	12	62102040	62672931	477	0.95663	0.380989	0.70675	0.976499
	FAM207A	21	46359925	46396904	598	0.509448	0.680927	0.699389	0.976499
	FAM208A	3	56654573	56717265	445	0.795748	0.075978	0.156079	0.976499
	FAM20A	17	66531254	66597530	467	0.364887	0.783139	0.532604	0.976499
	FAM215B	17	44636196	44640161	136	0.932649	0.20639	0.517839	0.976499
	FAM21C	10	46222680	46288409	173	0.0615221	0.301039	0.117854	0.976499
	FAM220A	7	6369040	6388612	298	0.688548	0.26192	0.546545	0.976499
	FAM220CP	9	99883941	99884771	299	0.87467	0.407032	0.631249	0.976499
	FAM227B	15	49619159	49913128	369	0.320838	0.0445905	0.107798	0.976499
	FAM228A	2	24397938	24423718	283	0.183646	0.769476	0.403366	0.976499
	FAM228B	2	24299396	24392509	318	0.199078	0.890963	0.488267	0.976499
	FAM229B	6	112408802	112423993	500	0.669969	0.177223	0.313516	0.976499
	FAM26F	6	116782533	116784934	380	0.384504	0.950448	0.744746	0.976499
	FAM3C	7	120988905	121036418	369	0.24035	0.998026	0.551088	0.976499
	FAM47E	4	77135193	77204933	484	0.675922	0.413844	0.513099	0.976499
	FAM53A	4	1619642	1686029	273	0.732978	0.347098	0.644172	0.976499
	FAM57A	17	635652	646206	395	0.0548953	0.452843	0.138775	0.976499
	FAM57B	16	30036024	30064299	221	0.208311	0.962943	0.516236	0.976499
	FAM66A	8	12219527	12268510	173	0.660807	0.118428	0.18171	0.976499
	FAM71F2	7	128312342	128326929	370	0.606993	0.236473	0.39986	0.976499
	FAM72B	1	120837756	120855681	101	0.311107	0.0436013	0.0696336	0.976499
	FAM85A	8	12051976	12053789	202	0.751776	0.376856	0.683369	0.976499
	FAM86B2	8	12282913	12293915	187	0.952388	0.213118	0.514645	0.976499
	FAM86C1	11	71498556	71512282	336	0.488961	0.726459	0.748749	0.976499
	FAM86GP	11	3431582	3443726	409	0.96735	0.146714	0.409882	0.976499
	FAM86JP	3	125635463	125648867	408	0.469147	0.854087	0.720936	0.976499
	FAM90A25P	8	12272589	12275599	188	0.409497	0.294563	0.340959	0.976499
	FARP2	2	242295658	242431094	373	0.787883	0.0416737	0.141407	0.976499
	FASTKD1	2	170386259	170430385	433	0.273508	0.975516	0.613728	0.976499
	FBF1	17	73905655	73937137	402	0.517497	0.691437	0.668803	0.976499
	FBLN7	2	112895962	112945791	350	0.349994	0.133156	0.206347	0.976499
	FBN2	5	127593601	127994878	452	0.514885	0.267524	0.391451	0.976499
	FBXL20	17	37415384	37558776	331	0.618655	0.424718	0.681365	0.976499
	FBXL5	4	15606162	15683284	558	0.687721	0.0745686	0.147797	0.976499
	FBXO18	10	5932194	5979556	698	0.17694	0.623772	0.282028	0.976499
	FBXO31	16	87361033	87423366	585	0.600818	0.542364	0.739667	0.976499
	FBXO39	17	6679542	6700420	524	0.772644	0.0491049	0.102387	0.976499
	FBXO42	1	16573334	16678949	272	0.707415	0.520094	0.749135	0.976499
	FBXO7	22	32870663	32894818	646	0.857033	0.101918	0.303393	0.976499
	FBXW7	4	153242410	153457253	376	0.730655	0.249935	0.53988	0.976499
	FBXW8	12	117348761	117468953	456	0.194432	0.907087	0.437012	0.976499
	FCER2	19	7753644	7767032	396	0.238239	0.292861	0.227173	0.976499
	FCF1P2	3	48332283	48332865	255	0.336179	0.798396	0.671045	0.976499
	FCGR2C	1	161552880	161575452	451	0.34285	0.384772	0.324106	0.976499
	FCHSD1	5	141018869	141030986	518	0.545825	0.322369	0.491915	0.976499
	FCN1	9	137801431	137809809	680	0.111918	0.70143	0.285067	0.976499
	FDPS	1	155278539	155289593	277	0.334239	0.737901	0.568241	0.976499
	FER1L4	20	34146636	34195484	309	0.564804	0.483059	0.601865	0.976499
	FEZ2	2	36778570	36873230	611	0.871004	0.415038	0.738989	0.976499
	FGFR3	4	1795034	1810599	278	0.23914	0.502093	0.439174	0.976499
	FHL3	1	38462442	38471278	465	0.247601	0.886104	0.432674	0.976499
	FIGNL1	7	50511831	50518088	500	0.0498615	0.259061	0.0775437	0.976499
	FILIP1	6	76001575	76203454	318	0.0528522	0.560778	0.144383	0.976499
	FIS1	7	100882739	100895597	380	0.796853	0.114679	0.256555	0.976499
	FKBP6	7	72742167	72772634	161	0.435737	0.483785	0.595637	0.976499
	FKBP7	2	179328391	179343327	464	0.261333	0.388253	0.374299	0.976499
	FKRP	19	47249303	47280231	339	0.0824104	0.344971	0.154569	0.976499
	FLG	1	152274651	152297679	402	0.699481	0.31281	0.495524	0.976499
	FLG-AS1	1	152140601	152339163	376	0.789092	0.00873474	0.0339808	0.976499
	FLJ00104	16	87733757	87739290	493	0.653086	0.391369	0.558314	0.976499
	FLOT1	6	30695486	30710510	77	0.845913	0.183982	0.324309	0.976499
	FLRT3	20	14303634	14318262	415	0.339421	0.0209161	0.0587308	0.976499
	FLT1	13	28874489	29069265	457	0.901158	0.336784	0.679995	0.976499
	FLVCR1	1	213031597	213072705	414	0.217848	0.885375	0.487931	0.976499
	FLYWCH1	16	2961938	3001209	340	0.801912	0.315292	0.617151	0.976499
	FMO2	1	171154347	171181822	549	0.202678	0.542825	0.398001	0.976499
	FMO4	1	171283347	171311223	599	0.839868	0.280084	0.533372	0.976499
	FN3KRP	17	80674559	80688204	367	0.16792	0.329363	0.178526	0.976499
	FNBP1P1	2	74347807	74350345	360	0.706276	0.358166	0.521509	0.976499
	FOLH1	11	49168187	49230222	168	0.95811	0.324294	0.544978	0.976499
	FOLR3	11	71825915	71850936	258	0.927639	0.0351243	0.117755	0.976499
	FOXD4	9	116237	118417	388	0.249449	0.0878984	0.105192	0.976499
	FOXN2	2	48541776	48606433	360	0.151934	0.0385135	0.0567536	0.976499
	FOXRED2	22	36883237	36903148	642	0.886863	0.143063	0.372728	0.976499
	FPGT	1	74663896	74699770	361	0.133249	0.631723	0.307374	0.976499
	FPR1	19	52248425	52307363	604	0.0783993	0.222542	0.142963	0.976499
	FPR3	19	52298416	52329442	607	0.572198	0.0696749	0.19453	0.976499
	FRA10AC1	10	95427640	95462329	532	0.474521	0.308106	0.459362	0.976499
	FRG1B	20	29611857	29634010	91	0.277631	0.288445	0.326543	0.976499
	FRRS1	1	100174259	100231349	467	0.139516	0.480971	0.25988	0.976499
	FRRS1L	9	111892573	111929571	597	0.591591	0.447578	0.590863	0.976499
	FSTL4	5	132532147	132948255	647	0.308866	0.402894	0.394326	0.976499
	FTCD	21	47556176	47575481	498	0.73581	0.42842	0.700943	0.976499
	FTSJ2	7	2273866	2281840	420	0.0780622	0.461328	0.162544	0.976499
	FTSJ3	17	61896793	61907372	330	0.367338	0.549036	0.458639	0.976499
	FUCA1	1	24171567	24194784	377	0.966454	0.324627	0.688853	0.976499
	FUS	16	31191431	31203127	248	0.692593	0.362746	0.579356	0.976499
	FUT11	10	75532379	75540009	241	0.277458	0.929568	0.540217	0.976499
	FUT2	19	49199228	49209207	454	0.173677	0.908022	0.415538	0.976499
	FXYD5	19	35645633	35660786	487	0.5941	0.3115	0.525456	0.976499
	GAA	17	78075355	78093678	437	0.979366	0.0128085	0.0486183	0.976499
	GABPB1-AS1	15	50647606	50659636	421	0.71456	0.0901408	0.237085	0.976499
	GABRB3	15	26788693	27184686	472	0.0938165	0.990441	0.250941	0.976499
	GAD1	2	171669723	171717661	435	0.66143	0.153607	0.297813	0.976499
	GALC	14	88304164	88460009	473	0.588779	0.617355	0.717127	0.976499
	GALM	2	38893052	38968379	372	0.285828	0.414407	0.420138	0.976499
	GALNS	16	88880142	88923378	422	0.656252	0.0725066	0.216569	0.976499
	GALNT18	11	11292423	11643552	835	0.83863	0.496418	0.737624	0.976499
	GALNT3	2	166604101	166651192	436	0.464044	0.229089	0.372268	0.976499
	GAPT	5	57787262	57792917	523	0.756564	0.287022	0.573437	0.976499
	GAS2L3	12	100967461	101022064	447	0.112982	0.111567	0.113728	0.976499
	GATC	12	120884241	120899389	391	0.0826174	0.818248	0.174845	0.976499
	GBAS	7	56019486	56067874	287	0.885662	0.299048	0.634243	0.976499
	GBP1P1	1	89873238	89891802	365	0.191901	0.384834	0.355101	0.976499
	GBP3	1	89472349	89488577	344	0.210725	0.161534	0.150564	0.976499
	GBP7	1	89597434	89641723	357	0.354162	0.379774	0.483784	0.976499
	GCAT	22	38203912	38213183	417	0.526014	0.361935	0.573215	0.976499
	GCC2	2	109065017	109125854	357	0.612975	0.301524	0.562691	0.976499
	GCDH	19	13001840	13025021	323	0.0523863	0.37786	0.125992	0.976499
	GCNT1P1	20	18400804	18402098	464	0.523225	0.218628	0.391909	0.976499
	GCOM2	4	68904262	68905368	302	0.181199	0.768143	0.448957	0.976499
	GCSAML-AS1	1	247687981	247690054	471	0.28669	0.5514	0.418676	0.976499
	GDF10	10	48425815	48438976	185	0.756147	0.290476	0.520998	0.976499
	GDF9	5	132196873	132202238	411	0.798894	0.136094	0.360134	0.976499
	GEMIN4	17	647654	655899	394	0.683387	0.122085	0.316763	0.976499
	GEMIN7	19	45582453	45594782	368	0.634811	0.148349	0.345841	0.976499
	GFM1	3	158362067	158410364	389	0.483396	0.824889	0.704469	0.976499
	GFPT1	2	69546905	69614382	416	0.952707	0.0885575	0.286197	0.976499
	GGA3	17	73232694	73257754	377	0.727089	0.413113	0.711742	0.976499
	GGCX	2	85772404	85788670	473	0.175869	0.765992	0.372137	0.976499
	GGH	8	63927638	63951730	413	0.0162363	0.551204	0.0538583	0.976499
	GGNBP2	17	34900737	34946278	321	0.362176	0.936808	0.723597	0.976499
	GHRLOS	3	10329098	10335133	615	0.263985	0.471178	0.467592	0.976499
	GIMAP8	7	150147718	150176480	394	0.0580297	0.89908	0.170385	0.976499
	GJB5	1	35220648	35224113	408	0.487372	0.653686	0.689115	0.976499
	GK5	3	141882414	141944449	325	0.663726	0.19928	0.427788	0.976499
	GLB1L	2	220101392	220110176	398	0.475779	0.673683	0.720302	0.976499
	GLO1	6	38643701	38670917	559	0.10735	0.849856	0.253151	0.976499
	GLRX5	14	95999967	96011061	697	0.365741	0.0387497	0.0616505	0.976499
	GLS	2	191759878	191830278	353	0.507329	0.188961	0.344161	0.976499
	GLTP	12	110288748	110318293	353	0.507899	0.310761	0.43516	0.976499
	GLYATL2	11	58601542	58671688	349	0.102418	0.198053	0.124923	0.976499
	GNAL	18	11688955	11885674	455	0.513427	0.0561657	0.116433	0.976499
	GNB3	12	6949375	6956557	232	0.161706	0.157516	0.184867	0.976499
	GNG10	9	114423615	114432526	504	0.507145	0.174628	0.375247	0.976499
	GNL3	3	52715172	52728504	388	0.129628	0.71514	0.32799	0.976499
	GNPAT	1	231376953	231413719	488	0.236686	0.256892	0.309467	0.976499
	GNPDA2	4	44684217	44728612	376	0.458014	0.162587	0.330746	0.976499
	GNRHR	4	68605046	68620078	390	0.284348	0.167579	0.23564	0.976499
	GOLGA6L3	15	85783703	85790410	531	0.582136	0.617755	0.736232	0.976499
	GOLGA6L4	15	84904525	84914120	250	0.422433	0.534616	0.464928	0.976499
	GOLGA8H	15	30896329	30906764	180	0.544435	0.44764	0.622258	0.976499
	GOLGA8N	15	32885657	32896179	394	0.456905	0.668578	0.715031	0.976499
	GOT2	16	58741035	58768261	459	0.280021	0.591135	0.45125	0.976499
	GP1BA	17	4835592	4838325	447	0.213772	0.962381	0.52625	0.976499
	GPATCH2L	14	76618259	76720685	482	0.0325982	0.94359	0.111513	0.976499
	GPATCH8	17	42474784	42580798	380	0.278395	0.958113	0.54064	0.976499
	GPD1L	3	32147181	32210205	522	0.758352	0.0844142	0.151889	0.976499
	GPIHBP1	8	144295068	144299044	396	0.0158871	0.371082	0.0348324	0.976499
	GPR137B	1	236305832	236385165	530	0.0730168	0.780853	0.136826	0.976499
	GPR150	5	94955782	94957846	407	0.159997	0.113105	0.132007	0.976499
	GPR160	3	169755717	169803191	386	0.878824	0.35382	0.598012	0.976499
	GPR17	2	128403439	128410213	390	0.884094	0.372722	0.71969	0.976499
	GPR180	13	95254157	95286899	638	0.687013	0.45808	0.732083	0.976499
	GPR19	12	12813825	12849141	477	0.657816	0.584235	0.746744	0.976499
	GPR27	3	71803201	71805647	559	0.465213	0.685399	0.655805	0.976499
	GPR35	2	241544848	241570676	501	0.428741	0.493152	0.53857	0.976499
	GPR63	6	97242002	97285353	407	0.185127	0.0602668	0.0998764	0.976499
	GPR75	2	54080050	54087126	468	0.275709	0.497078	0.418612	0.976499
	GPX7	1	53068044	53074723	302	0.915581	0.185074	0.469281	0.976499
	GRHPR	9	37422663	37436987	464	0.677187	0.0478936	0.127833	0.976499
	GRIK1	21	30909254	31312351	496	0.967632	0.233934	0.42762	0.976499
	GRIN2B	12	13693165	14133053	486	0.228245	0.601747	0.423269	0.976499
	GRINA	8	145064226	145067583	239	0.839918	0.0961307	0.248791	0.976499
	GRIP2	3	14530858	14583588	633	0.958883	0.301274	0.65022	0.976499
	GRK7	3	141496990	141537332	391	0.212886	0.290576	0.28068	0.976499
	GRM2	3	51741086	51752629	237	0.821896	0.271184	0.514512	0.976499
	GRWD1	19	48949030	48960279	526	0.172394	0.512807	0.371331	0.976499
	GS1-259H13.2	7	99195689	99208439	311	0.146306	0.479963	0.279654	0.976499
	GS1-393G12.14	8	145634876	145635360	184	0.664691	0.637581	0.671242	0.976499
	GSAP	7	76940068	77045717	323	0.0469621	0.700453	0.152945	0.976499
	GSDMA	17	38119226	38134019	300	0.662724	0.608884	0.705852	0.976499
	GSDMD	8	144635377	144645232	357	0.376082	0.0643595	0.130237	0.976499
	GSTCD	4	106630266	106768885	404	0.563846	0.332266	0.463954	0.976499
	GSTM4	1	110198703	110208118	458	0.313894	0.915287	0.664296	0.976499
	GSTM5	1	110254864	110318050	441	0.148372	0.920631	0.353809	0.976499
	GSTO2	10	106028631	106064703	426	0.277728	0.956531	0.512109	0.976499
	GSTT1	22	24376212	24384680	388	0.0280572	0.4527	0.0566369	0.976499
	GSTT2	22	24322339	24326106	402	0.321178	0.200524	0.245943	0.976499
	GSTT2B	22	24299601	24303373	407	0.245549	0.189015	0.200511	0.976499
	GSTZ1	14	77787228	77797940	549	0.789775	0.41116	0.67898	0.976499
	GTF2F1	19	6379580	6393992	392	0.932979	0.0639937	0.218874	0.976499
	GTF2H1	11	18343842	18388591	440	0.116018	0.967119	0.340036	0.976499
	GTF2H2	5	70330784	70363479	52	0.970963	0.326926	0.692764	0.976499
	GTF2H5	6	158589384	158620376	530	0.302614	0.922532	0.613012	0.976499
	GTPBP1	22	39101728	39134304	374	0.906241	0.313069	0.583154	0.976499
	GTPBP10	7	89964537	90020769	476	0.128139	0.34404	0.146097	0.976499
	GTPBP3	19	17445729	17453544	439	0.821973	0.099341	0.196503	0.976499
	GTSF1	12	54849734	54867383	412	0.839111	0.332894	0.654811	0.976499
	GUCY1B2	13	51568647	51654998	493	0.401275	0.815256	0.739708	0.976499
	GUF1	4	44680574	44702943	373	0.822216	0.197893	0.476323	0.976499
	GULP1	2	189156396	189460653	283	0.222956	0.81238	0.507975	0.976499
	GUSBP1	5	21341942	21589481	261	0.580869	0.0152911	0.045889	0.976499
	GUSBP2	6	26839263	26924333	396	0.639235	0.0459629	0.145615	0.976499
	GUSBP3	5	68790040	69006341	99	0.385956	0.18107	0.316937	0.976499
	GUSBP4	6	58246051	58256569	153	0.891544	0.390957	0.747291	0.976499
	GUSBP5	4	144480625	144570458	258	0.667433	0.0302585	0.0933251	0.976499
	GUSBP9	5	70435716	70585611	162	0.992986	0.263616	0.617735	0.976499
	GXYLT2	3	72937224	73026077	445	0.96211	0.0253587	0.0978948	0.976499
	GYPE	4	144792020	144826716	258	0.885861	0.33107	0.673061	0.976499
	H1FX	3	129033615	129035120	295	0.577921	0.435665	0.642889	0.976499
	H3F3A	1	226249578	226259702	387	0.560162	0.0192093	0.035322	0.976499
	HAAO	2	42994229	43019732	455	0.974911	0.327072	0.646263	0.976499
	HAGH	16	1845621	1876967	476	0.336679	0.318946	0.398472	0.976499
	HAO2	1	119911402	119936753	442	0.556308	0.230673	0.419673	0.976499
	HAPLN4	19	19366450	19373605	355	0.450636	0.109844	0.152412	0.976499
	HAUS1	18	43684301	43708299	516	0.243167	0.648274	0.458574	0.976499
	HAUS4	14	23415437	23426370	572	0.2058	0.958386	0.462556	0.976499
	HAUS6	9	19053141	19103117	651	0.216517	0.430642	0.400731	0.976499
	HAVCR1P1	19	24345172	24346227	140	0.141292	0.366355	0.149614	0.976499
	HBS1L	6	135281516	135424194	357	0.38658	0.0475956	0.108983	0.976499
	HCG22	6	31021227	31027667	144	0.884484	0.0798602	0.177274	0.976499
	HCG27	6	31165915	31171745	176	0.101719	0.774178	0.189555	0.976499
	HCG4P3	6	29973898	29974893	41	0.583315	0.577012	0.707281	0.976499
	HCG4P5	6	29909874	29910844	41	0.506238	0.535803	0.656116	0.976499
	HDAC10	22	50683612	50688288	398	0.538304	0.362301	0.432287	0.976499
	HDDC3	15	91474148	91475799	499	0.100324	0.362484	0.201977	0.976499
	HDHD2	18	44634434	44676891	515	0.622515	0.0197491	0.0629049	0.976499
	HDLBP	2	242166679	242256476	377	0.943972	0.0285976	0.112495	0.976499
	HEATR1	1	236716881	236767804	643	0.758035	0.135896	0.357196	0.976499
	HEATR3	16	50099852	50140298	376	0.548653	0.264838	0.423388	0.976499
	HEATR6	17	58120555	58156292	226	0.502094	0.192938	0.233767	0.976499
	HEBP1	12	13127798	13153118	608	0.746401	0.35547	0.555353	0.976499
	HELB	12	66696325	66737423	503	0.215666	0.97265	0.472085	0.976499
	HEPHL1	11	93754527	93846917	417	0.451725	0.12285	0.262322	0.976499
	HERC1	15	63900817	64126141	346	0.0481477	0.861327	0.150175	0.976499
	HERC2P10	15	31107474	31136356	284	0.424349	0.699855	0.716707	0.976499
	HES2	1	6472478	6484730	413	0.130534	0.396447	0.247513	0.976499
	HEXA	15	72635775	72668453	294	0.18489	0.951209	0.400916	0.976499
	HFM1	1	91726323	91870426	526	0.382407	0.211645	0.217198	0.976499
	HHIPL1	14	100111447	100146906	447	0.0918305	0.686707	0.261997	0.976499
	HIBCH	2	191054461	191184771	341	0.219438	0.434681	0.410434	0.976499
	HINFP	11	118992297	119006752	380	0.365728	0.836054	0.641124	0.976499
	HINT1	5	130494720	130507428	263	0.494645	0.0657534	0.1832	0.976499
	HIPK1	1	114471941	114520426	471	0.816057	0.178293	0.452734	0.976499
	HIST2H2BA	1	120906028	120915073	78	0.440346	0.0323551	0.0920619	0.976499
	HIST2H3DP1	1	120904675	120905006	78	0.60818	0.0409234	0.123091	0.976499
	HLA-AS1	1	221006105	221006534	396	0.130746	0.661601	0.320308	0.976499
	HLA-C	6	31236526	31239882	207	0.949029	0.185832	0.389458	0.976499
	HLA-F	6	29690552	29706305	42	0.36928	0.723911	0.650282	0.976499
	HLA-H	6	29856244	29858259	42	0.327588	0.708663	0.583764	0.976499
	HLA-J	6	29975174	29977733	41	0.35689	0.448935	0.439799	0.976499
	HLA-K	6	29894955	29897009	41	0.572047	0.461888	0.657532	0.976499
	HLA-S	6	31349851	31350065	239	0.541231	0.41372	0.570259	0.976499
	HLA-U	6	29901878	29902063	41	0.445795	0.745754	0.720229	0.976499
	HLA-W	6	29924373	29926347	41	0.805999	0.445179	0.700607	0.976499
	HLCS	21	38123189	38362536	459	0.496261	0.342386	0.476876	0.976499
	HMBS	11	118955576	118964259	379	0.228612	0.867437	0.464794	0.976499
	HMG20B	19	3572775	3579086	381	0.331563	0.655301	0.486318	0.976499
	HMGB1P31	2	54278471	54278897	454	0.5575	0.403889	0.638574	0.976499
	HMGN2P19	1	229706279	229706543	421	0.73289	0.1513	0.268662	0.976499
	HMGN4	6	26538633	26546482	487	0.102967	0.139257	0.130612	0.976499
	HMHA1	19	1065922	1086593	468	0.317787	0.972357	0.683433	0.976499
	HN1L	16	1728257	1752281	486	0.362338	0.273638	0.372977	0.976499
	HNRNPA1L2	13	53191605	53217919	421	0.451409	0.793769	0.717708	0.976499
	HNRNPCP1	14	58987941	58988706	454	0.250927	0.471761	0.463428	0.976499
	HNRNPCP7	7	63961203	63962107	329	0.0615924	0.58254	0.160008	0.976499
	HOOK3	8	42752075	42885682	220	0.827319	0.285582	0.568166	0.976499
	HORMAD1	1	150670536	150693364	303	0.162463	0.623198	0.280629	0.976499
	HOTAIRM1	7	27135713	27139720	419	0.422061	0.480375	0.593668	0.976499
	HOXA2	7	27139885	27142430	414	0.727474	0.433797	0.709926	0.976499
	HOXA4	7	27168380	27170418	392	0.902459	0.179675	0.421491	0.976499
	HOXA5	7	27180671	27183287	396	0.0756523	0.170066	0.107199	0.976499
	HOXA6	7	27185015	27187393	397	0.694853	0.422016	0.669927	0.976499
	HOXA7	7	27195586	27197555	396	0.604563	0.261519	0.458452	0.976499
	HOXB2	17	46618256	46622856	410	0.477768	0.426121	0.597102	0.976499
	HOXD-AS1	2	177037923	177053268	455	0.680245	0.308316	0.500608	0.976499
	HOXD1	2	177053307	177055688	455	0.50997	0.437757	0.504641	0.976499
	HPS4	22	26847446	26879802	780	0.879744	0.389054	0.730022	0.976499
	HRCT1	9	35906189	35907138	437	0.311704	0.15032	0.164151	0.976499
	HRNR	1	152184558	152196669	386	0.526062	0.0202332	0.0559862	0.976499
	hsa-mir-8072	12	123848415	123850660	346	0.298813	0.32072	0.37956	0.976499
	HSBP1L1	18	77724561	77730822	316	0.54945	0.815178	0.711883	0.976499
	HSD17B1	17	40701232	40707231	252	0.623609	0.287923	0.450463	0.976499
	HSD17B11	4	88257762	88312538	455	0.324161	0.521796	0.525395	0.976499
	HSD17B12	11	43577986	43878160	512	0.728751	0.158018	0.366787	0.976499
	HSD17B13	4	88224941	88244058	415	0.0118954	0.396701	0.0367673	0.976499
	HSD17B1P1	17	40698782	40700724	253	0.647643	0.268961	0.42163	0.976499
	HSD17B7P2	10	38645305	38667433	138	0.862588	0.381598	0.709714	0.976499
	HSD3B7	16	30996519	31000473	231	0.266696	0.761797	0.563923	0.976499
	HSF2	6	122720691	122754264	414	0.170191	0.423189	0.289515	0.976499
	HSPA12A	10	118430703	118502085	430	0.0325468	0.517396	0.0818048	0.976499
	HSPA7	1	161576081	161578007	452	0.489409	0.463369	0.501396	0.976499
	HSPG2	1	22154356	22263790	523	0.149571	0.388648	0.264551	0.976499
	HTATIP2	11	20385231	20405329	707	0.17635	0.877603	0.360517	0.976499
	HTATSF1P2	6	3023376	3024006	678	0.957067	0.0170759	0.0599947	0.976499
	HTR1B	6	78171948	78173490	393	0.0871955	0.757143	0.246376	0.976499
	HTR2B	2	231972944	231989832	428	0.138012	0.0318632	0.043366	0.976499
	HYI	1	43918574	43919597	440	0.28017	0.902938	0.549424	0.976499
	IARS	9	94972489	95056038	412	0.840873	0.0195307	0.0763017	0.976499
	IFFO1	12	6647541	6665239	336	0.331587	0.350731	0.380669	0.976499
	IFITM5	11	298200	299526	319	0.174358	0.871797	0.44233	0.976499
	IFNA20P	9	21321299	21321826	482	0.846733	0.32023	0.642296	0.976499
	IFNAR2	21	34602206	34636177	454	0.447912	0.350229	0.485441	0.976499
	IFNG-AS1	12	68383225	68628466	609	0.0634644	0.265911	0.115283	0.976499
	IFRD1	7	112063023	112121045	402	0.598877	0.315454	0.51473	0.976499
	IFT122	3	129158968	129239198	281	0.216059	0.75093	0.472195	0.976499
	IFT140	16	1560459	1662111	481	0.931409	0.250922	0.54735	0.976499
	IFT46	11	118415243	118443685	442	0.910516	0.241538	0.529395	0.976499
	IFT81	12	110562140	110656602	272	0.825192	0.218026	0.46805	0.976499
	IGFL1P1	19	46699495	46700580	418	0.653545	0.448905	0.72163	0.976499
	IGHEP2	9	5113549	5114804	536	0.737163	0.431184	0.641066	0.976499
	IGHMBP2	11	68671310	68708067	408	0.577683	0.620948	0.742137	0.976499
	IGHV3-53	14	107048672	107049341	58	0.303983	0.782566	0.605309	0.976499
	IGHV4-39	14	106877619	106878126	58	0.640106	0.583916	0.745924	0.976499
	IGKJ5	2	89160080	89160117	135	0.0558581	0.101366	0.0446312	0.976499
	IGKV1-27	2	89512908	89513413	24	0.374585	0.141269	0.192429	0.976499
	IGKV1-39	2	89619383	89619904	17	0.168607	0.328646	0.234753	0.976499
	IGLC2	22	23243156	23243617	316	0.47611	0.860007	0.690135	0.976499
	IGLV1-41	22	22758539	22759053	350	0.169766	0.179472	0.165235	0.976499
	IGLV5-52	22	22673082	22673581	356	0.86884	0.154025	0.361503	0.976499
	IKBIP	12	99007183	99038891	443	0.35915	0.349754	0.294422	0.976499
	IKBKAP	9	111629797	111696396	608	0.722264	0.169599	0.371747	0.976499
	IKZF5	10	124750322	124768333	588	0.0494534	0.19788	0.0949463	0.976499
	IL10RB	21	34638663	34669539	448	0.696523	0.266281	0.553661	0.976499
	IL17RA	22	17565844	17596583	497	0.76664	0.26137	0.506253	0.976499
	IL1RN	2	113864791	113891593	471	0.547552	0.522318	0.641248	0.976499
	IL20RB	3	136676707	136729927	330	0.55562	0.250602	0.48651	0.976499
	IL21R-AS1	16	27458990	27464714	520	0.826714	0.129944	0.354755	0.976499
	IL32	16	3115298	3131908	374	0.0826342	0.518804	0.155006	0.976499
	IL34	16	70613798	70694585	155	0.247057	0.580231	0.498779	0.976499
	ILF3-AS1	19	10762538	10764520	373	0.827268	0.537398	0.73096	0.976499
	IMMP1L	11	31453948	31531192	268	0.028425	0.467789	0.0825921	0.976499
	IMMT	2	86371055	86422712	455	0.973915	0.321427	0.611229	0.976499
	IMPDH1	7	128032331	128050306	388	0.4063	0.231175	0.347069	0.976499
	INCENP	11	61891445	61920635	456	0.465927	0.66944	0.644925	0.976499
	ING5	2	242641455	242668893	236	0.846737	0.264921	0.592266	0.976499
	INO80B	2	74682150	74685087	380	0.718933	0.258668	0.547536	0.976499
	INO80E	16	30006615	30016829	204	0.200118	0.947614	0.508675	0.976499
	INPP1	2	191208196	191236391	342	0.74369	0.151337	0.397094	0.976499
	INTS1	7	1509913	1545489	372	0.862705	0.471523	0.743791	0.976499
	INTS4	11	77589803	77705724	351	0.307312	0.104096	0.107875	0.976499
	INTS4L1	7	64601603	64694600	214	0.546748	0.373598	0.479334	0.976499
	INTS8	8	95825539	95888717	442	0.352474	0.762715	0.592161	0.976499
	INVS	9	102861538	103063282	291	0.088205	0.515312	0.207116	0.976499
	IQCB1	3	121488610	121553926	421	0.155489	0.717619	0.353948	0.976499
	IQCE	7	2598632	2654368	486	0.693034	0.219432	0.406585	0.976499
	IQGAP1	15	90931450	91045475	411	0.726448	0.527785	0.681647	0.976499
	IQGAP2	5	75699074	76003957	575	0.288324	0.264452	0.366907	0.976499
	IRAK1BP1	6	79577189	79656157	376	0.236356	0.845093	0.542149	0.976499
	IRF5	7	128577666	128590089	337	0.776671	0.296443	0.617676	0.976499
	IRF7	11	612553	615999	465	0.2686	0.947886	0.543271	0.976499
	ISPD	7	16130817	16460947	624	0.260361	0.64532	0.53524	0.976499
	ITGA1	5	52083730	52255040	581	0.0125556	0.868408	0.0372519	0.976499
	ITGA6	2	173292082	173371181	467	0.288482	0.991935	0.549123	0.976499
	ITGB3	17	45331212	45389182	330	0.212718	0.446837	0.291703	0.976499
	ITGB3BP	1	63906441	63994857	491	0.132163	0.239663	0.144423	0.976499
	ITGB6	2	160956177	161128399	427	0.113396	0.942977	0.338861	0.976499
	ITIH4	3	52846991	52864755	389	0.19617	0.697292	0.458316	0.976499
	ITIH5	10	7601232	7708961	605	0.516705	0.551064	0.697924	0.976499
	ITPA	20	3189514	3204516	439	0.792029	0.0249683	0.0812251	0.976499
	ITPR3	6	33588142	33664351	523	0.0971535	0.320638	0.177819	0.976499
	ITPRIPL2	16	19125254	19132030	415	0.723748	0.477354	0.734958	0.976499
	ITSN2	2	24425733	24583583	304	0.703231	0.517798	0.752651	0.976499
	IZUMO1	19	49244145	49250166	429	0.151396	0.866477	0.409235	0.976499
	JAKMIP2	5	146967990	147162338	447	0.740324	0.372852	0.652789	0.976499
	JKAMP	14	59951161	59971429	460	0.167753	0.947565	0.380299	0.976499
	JMJD7	15	42120283	42129779	410	0.787441	0.202248	0.476496	0.976499
	JRK	8	143738874	143763338	408	0.746269	0.26961	0.561309	0.976499
	KANSL1	17	44107282	44302733	46	0.53305	0.036061	0.102964	0.976499
	KANSL1-AS1	17	44270942	44274089	29	0.168243	0.405146	0.315642	0.976499
	KAT8	16	31127075	31142714	243	0.0116603	0.808481	0.0489879	0.976499
	KATNAL2	18	44497469	44627658	519	0.867253	0.0198809	0.0636814	0.976499
	KB-1471A8.1	8	120879659	120886728	455	0.599166	0.684002	0.750763	0.976499
	KB-208E9.1	22	23923067	23926046	469	0.311812	0.536016	0.517005	0.976499
	KB-226F1.1	22	24375562	24376132	381	0.0243641	0.444073	0.0447058	0.976499
	KB-226F1.2	22	24311400	24312062	407	0.400499	0.147068	0.212734	0.976499
	KCNA2	1	111136202	111174096	531	0.182813	0.940563	0.462525	0.976499
	KCNAB3	17	7825177	7833121	508	0.247766	0.552491	0.351653	0.976499
	KCNC1	11	17756359	17804219	538	0.431365	0.731906	0.664983	0.976499
	KCNE1	21	35818988	35884573	502	0.401702	0.0530909	0.110617	0.976499
	KCNH4	17	40308909	40333296	321	0.857361	0.158291	0.329456	0.976499
	KCNMB3	3	178960552	178984790	364	0.331936	0.504563	0.470762	0.976499
	KCNS1	20	43720951	43729753	462	0.756833	0.0326302	0.117185	0.976499
	KCTD10	12	109886461	109915206	428	0.732855	0.209048	0.350083	0.976499
	KCTD21-AS1	11	77850817	77886369	343	0.365666	0.0383514	0.0731827	0.976499
	KDELC2	11	108342832	108369159	322	0.517438	0.566432	0.671815	0.976499
	KDM4B	19	4969125	5153606	419	0.363321	0.122533	0.247668	0.976499
	KHK	2	27309615	27323465	313	0.931855	0.0139023	0.0593279	0.976499
	KHNYN	14	24899141	24910540	558	0.259985	0.15557	0.213328	0.976499
	KIAA0513	16	85061375	85127836	638	0.796919	0.0599994	0.189821	0.976499
	KIAA0753	17	6481468	6544077	571	0.31868	0.11035	0.142359	0.976499
	KIAA1045	9	34957484	34982541	347	0.20085	0.0311197	0.0503938	0.976499
	KIAA1430	4	186080819	186130658	522	0.661096	0.140362	0.347818	0.976499
	KIAA1467	12	13197218	13295455	611	0.460823	0.353199	0.482925	0.976499
	KIAA1468	18	59854491	59974355	511	0.484777	0.626565	0.565567	0.976499
	KIAA1715	2	176788620	176867567	449	0.682671	0.471893	0.645586	0.976499
	KIAA1755	20	36838890	36889174	498	0.0322157	0.811907	0.117093	0.976499
	KIAA1875	8	145162629	145173218	231	0.242506	0.191548	0.257669	0.976499
	KIAA1984-AS1	9	139698379	139703300	410	0.0800021	0.744474	0.207812	0.976499
	KIF25-AS1	6	168393502	168397757	467	0.707734	0.550476	0.730367	0.976499
	KIF2A	5	61601989	61682210	388	0.832361	0.481436	0.747764	0.976499
	KIF3A	5	132028320	132073330	418	0.410607	0.266331	0.436245	0.976499
	KIFC2	8	145691426	145698794	185	0.188001	0.883548	0.483341	0.976499
	KIN	10	7792925	7829990	617	0.438318	0.447661	0.578858	0.976499
	KLC1	14	104028233	104167888	361	0.262582	0.487136	0.463692	0.976499
	KLHDC4	16	87730091	87799598	468	0.0920729	0.538277	0.204484	0.976499
	KLHDC7A	1	18807424	18812478	653	0.242941	0.642491	0.430122	0.976499
	KLHL2	4	166128770	166244308	482	0.176958	0.0734244	0.0817195	0.976499
	KLHL24	3	183353356	183402265	475	0.170235	0.0254738	0.0424969	0.976499
	KLHL2P1	4	120255484	120299388	441	0.939157	0.423	0.709979	0.976499
	KLHL36	16	84682131	84695920	876	0.59983	0.472332	0.683097	0.976499
	KLHL5	4	39046659	39128477	488	0.492032	0.342631	0.45609	0.976499
	KLKB1	4	187147592	187179625	570	0.0719863	0.677771	0.162097	0.976499
	KLRAP1	12	10741077	10752434	454	0.173127	0.0224417	0.0462838	0.976499
	KLRC1	12	10598627	10607284	492	0.098965	0.21947	0.166216	0.976499
	KLRG2	7	139137436	139168458	405	0.153444	0.78781	0.329921	0.976499
	KMT2A	11	118307205	118397539	461	0.373867	0.30267	0.411295	0.976499
	KNOP1	16	19714902	19729016	450	0.545618	0.615069	0.658791	0.976499
	KPNA4	3	160212783	160283234	353	0.130038	0.751261	0.262845	0.976499
	KRBA2	17	8271955	8280029	456	0.295002	0.196528	0.264062	0.976499
	KRT222	17	38810917	38821433	396	0.313708	0.980078	0.679563	0.976499
	KRT83	12	52708085	52715182	800	0.16094	0.0708809	0.104314	0.976499
	KRT8P12	3	160283377	160287036	353	0.318695	0.699811	0.606906	0.976499
	KRT8P26	11	65494410	65495685	332	0.108183	0.0895188	0.042124	0.976499
	KRT8P46	4	103649903	103651328	348	0.482428	0.0650998	0.163285	0.976499
	KRTAP5-1	11	1605572	1606513	400	0.931079	0.329147	0.680699	0.976499
	KRTAP5-AS1	11	1592583	1620414	400	0.814793	0.302039	0.621118	0.976499
	KXD1	19	18668572	18680197	375	0.0706357	0.500195	0.101708	0.976499
	L1TD1	1	62660503	62678000	456	0.12624	0.349954	0.239965	0.976499
	L3MBTL3	6	130334844	130462594	561	0.660187	0.491905	0.696323	0.976499
	LA16c-380H5.5	16	3056121	3057386	356	0.939016	0.347021	0.675182	0.976499
	LA16c-390E6.4	16	1501761	1502654	481	0.339606	0.169695	0.273008	0.976499
	LACC1	13	44453420	44468068	533	0.63216	0.430423	0.549432	0.976499
	LACTB	15	63413999	63434260	516	0.912117	0.207654	0.47845	0.976499
	LAMA4	6	112429963	112576141	451	0.742622	0.460481	0.639944	0.976499
	LARS2	3	45429998	45590913	512	0.331701	0.611199	0.534417	0.976499
	LATS1	6	149979289	150039392	462	0.1358	0.574927	0.310722	0.976499
	LBP	20	36974759	37005665	502	0.332552	0.557226	0.468772	0.976499
	LCA5L	21	40777770	40817729	686	0.0950202	0.886212	0.244352	0.976499
	LCLAT1	2	30670092	30867091	488	0.418458	0.307927	0.432999	0.976499
	LCMT2	15	43619974	43622803	264	0.259172	0.913294	0.552583	0.976499
	LDB3	10	88428206	88495825	391	0.281752	0.393994	0.384045	0.976499
	LEMD2	6	33738979	33756913	539	0.212892	0.374011	0.263551	0.976499
	LGALS7B	19	39279851	39282389	402	0.80544	0.485214	0.752312	0.976499
	LGALS8	1	236681300	236716281	639	0.601391	0.25237	0.504917	0.976499
	LGALS9C	17	18380051	18398259	282	0.0833608	0.340613	0.139696	0.976499
	LGR5	12	71833550	71980090	433	0.714905	0.447947	0.683841	0.976499
	LHCGR	2	48859428	48982880	548	0.276029	0.494728	0.398206	0.976499
	LHFP	13	39917029	40177665	518	0.475528	0.515259	0.585521	0.976499
	LHFPL5	6	35773070	35791852	423	0.139603	0.906651	0.369464	0.976499
	LIG4	13	108859787	108870716	598	0.591338	0.189611	0.425102	0.976499
	LIMD1	3	45596886	45727830	521	0.331903	0.629832	0.468183	0.976499
	LIME1	20	62367635	62370456	441	0.52412	0.417898	0.591781	0.976499
	LIN37	19	36239262	36245420	436	0.0233903	0.197626	0.0345862	0.976499
	LIN52	14	74551499	74667936	420	0.379227	0.351693	0.404956	0.976499
	LIN7C	11	27516123	27528320	388	0.973177	0.165258	0.317964	0.976499
	LINC00115	1	761586	762902	162	0.0240591	0.911524	0.0954662	0.976499
	LINC00174	7	65841031	65866325	238	0.262201	0.930047	0.563346	0.976499
	LINC00240	6	26924771	26991703	395	0.0327622	0.462939	0.0872012	0.976499
	LINC00265	7	39773231	39832691	362	0.0517449	0.779884	0.161066	0.976499
	LINC00271	6	135818489	136037193	367	0.979371	0.0942076	0.267324	0.976499
	LINC00299	2	8147901	8523751	501	0.702733	0.0220769	0.0813968	0.976499
	LINC00339	1	22351681	22357716	520	0.0412862	0.515459	0.0751505	0.976499
	LINC00467	1	211556145	211605878	430	0.88503	0.305334	0.650262	0.976499
	LINC00471	2	232373137	232379050	359	0.285611	0.24753	0.307934	0.976499
	LINC00476	9	98521513	98637982	531	0.641002	0.0809784	0.184869	0.976499
	LINC00479	21	43131680	43135935	748	0.377042	0.666228	0.617812	0.976499
	LINC00487	2	6868309	6910442	621	0.743246	0.366943	0.663938	0.976499
	LINC00493	20	18548064	18550207	474	0.0432265	0.590525	0.123545	0.976499
	LINC00610	11	36290834	36294909	606	0.140912	0.915506	0.397319	0.976499
	LINC00638	14	105287538	105290055	360	0.202197	0.751165	0.476347	0.976499
	LINC00639	14	39218545	39417477	370	0.48737	0.5476	0.668862	0.976499
	LINC00640	14	51800111	51832275	658	0.219213	0.556178	0.427865	0.976499
	LINC00649	21	35289317	35349992	406	0.312185	0.170232	0.185799	0.976499
	LINC00662	19	28175488	28284802	289	0.462084	0.552645	0.612432	0.976499
	LINC00664	19	21666176	21686040	295	0.601943	0.0992669	0.231716	0.976499
	LINC00665	19	36803969	36822620	306	0.470117	0.0981796	0.14331	0.976499
	LINC00667	18	5238598	5246507	500	0.345077	0.167743	0.252045	0.976499
	LINC00672	17	37081421	37084310	361	0.474482	0.0373712	0.106252	0.976499
	LINC00680	6	58272352	58287779	150	0.801358	0.405864	0.73662	0.976499
	LINC00702	10	4243333	4286104	651	0.0902887	0.668646	0.128134	0.976499
	LINC00707	10	6821560	6884868	760	0.842925	0.190584	0.37329	0.976499
	LINC00839	10	42970991	42990784	243	0.30046	0.907826	0.646211	0.976499
	LINC00852	3	10326103	10327358	618	0.249304	0.535618	0.442289	0.976499
	LINC00854	17	41368960	41383338	300	0.329636	0.582717	0.520242	0.976499
	LINC00861	8	126934552	126963493	482	0.874039	0.455088	0.722871	0.976499
	LINC00910	17	41447213	41466567	316	0.0925027	0.707192	0.266705	0.976499
	LINC00926	15	57592563	57599959	553	0.288603	0.314464	0.319742	0.976499
	LINC00941	12	30947977	30955645	541	0.335285	0.0778373	0.146055	0.976499
	LINC00957	7	44078770	44081905	346	0.167112	0.193235	0.215896	0.976499
	LINC00959	10	131864638	131909081	630	0.354707	0.125844	0.228153	0.976499
	LINC00961	9	35909480	35911683	438	0.050509	0.614247	0.0985164	0.976499
	LINC00969	3	195384933	195456422	284	0.393802	0.681937	0.6753	0.976499
	LINC01003	7	152160871	152162634	251	0.322657	0.988784	0.606611	0.976499
	LINC01013	6	132453055	132490514	512	0.888456	0.314491	0.667332	0.976499
	LINC01060	4	189321890	189602205	492	0.153299	0.520419	0.335999	0.976499
	LINC01071	13	44974386	44980120	452	0.383021	0.829697	0.640872	0.976499
	LINC01087	2	132394598	132407188	133	0.669115	0.34247	0.53381	0.976499
	LINC01088	4	79892902	80229952	332	0.288132	0.868117	0.628065	0.976499
	LIPG	18	47087069	47119272	517	0.103654	0.620901	0.259256	0.976499
	LIPT1	2	99771428	99779620	298	0.473411	0.550447	0.585852	0.976499
	LITAF	16	11641853	11730237	472	0.494836	0.275667	0.491175	0.976499
	LL22NC03-2H8.4	22	22648098	22649159	361	0.338116	0.188804	0.288982	0.976499
	LL22NC03-2H8.5	22	22638312	22641586	364	0.396016	0.0584086	0.116081	0.976499
	LL22NC03-80A10.6	22	22657589	22664766	357	0.572455	0.0588909	0.144495	0.976499
	LL22NC03-86G7.1	22	22292957	22297799	418	0.64196	0.116802	0.171888	0.976499
	LMAN2	5	176758563	176778853	296	0.241666	0.573745	0.449463	0.976499
	LMBR1L	12	49490919	49504681	314	0.510115	0.835741	0.693234	0.976499
	LMOD1	1	201865580	201915715	476	0.352417	0.550811	0.508673	0.976499
	LNP1	3	100120243	100175163	403	0.0399725	0.99558	0.151224	0.976499
	LOH12CR1	12	12510013	12619840	531	0.183125	0.656577	0.392713	0.976499
	LONP1	19	5691888	5720583	400	0.531455	0.320166	0.492284	0.976499
	LPAR2	19	19734477	19739739	346	0.353829	0.283835	0.290059	0.976499
	LPAR5	12	6728001	6745613	300	0.0365387	0.226613	0.0813472	0.976499
	LRGUK	7	133812052	133949343	440	0.639036	0.0133151	0.0418263	0.976499
	LRIT3	4	110769358	110793471	407	0.212794	0.252021	0.224288	0.976499
	LRPPRC	2	44113647	44223144	507	0.165435	0.529933	0.26344	0.976499
	LRR1	14	50065883	50081390	388	0.300445	0.943909	0.64656	0.976499
	LRRC16A	6	25279306	25620758	651	0.201786	0.0760672	0.115809	0.976499
	LRRC20	10	72058729	72142382	664	0.124535	0.382332	0.265281	0.976499
	LRRC23	12	7013897	7023407	200	0.842505	0.081817	0.242174	0.976499
	LRRC3	21	45875369	45878739	528	0.90569	0.185028	0.322857	0.976499
	LRRC37A	17	44370099	44415160	78	0.36357	0.192417	0.249965	0.976499
	LRRC37A15P	4	103648431	103651878	345	0.710662	0.0184879	0.0599542	0.976499
	LRRC37A2	17	44588877	44630815	136	0.173263	0.532627	0.357552	0.976499
	LRRC37A4P	17	43578685	43627701	138	0.131109	0.849228	0.353651	0.976499
	LRRC37A5P	9	114353872	114393569	503	0.801615	0.272607	0.558328	0.976499
	LRRC37A6P	10	27535279	27548384	453	0.718884	0.325326	0.633031	0.976499
	LRRC39	1	100617941	100643771	443	0.134608	0.415542	0.227659	0.976499
	LRRC3DN	21	45879814	45882078	531	0.56597	0.238369	0.353051	0.976499
	LRRC43	12	122652285	122688018	332	0.44324	0.731634	0.739867	0.976499
	LRRC45	17	79981178	79989027	322	0.336588	0.969335	0.688849	0.976499
	LRRC46	17	45908993	45915057	383	0.286997	0.292079	0.281768	0.976499
	LRRC48	17	17876127	17920203	385	0.676983	0.0827963	0.165163	0.976499
	LRRC57	15	42834720	42841000	333	0.380854	0.463149	0.441131	0.976499
	LRRC8B	1	89990395	90063423	350	0.815455	0.0932924	0.282409	0.976499
	LRRCC1	8	86019382	86058311	261	0.691937	0.667889	0.747885	0.976499
	LRRIQ3	1	74491699	74663871	361	0.190893	0.555778	0.392761	0.976499
	LRRK2	12	40590546	40763087	537	0.340697	0.762073	0.524309	0.976499
	LRWD1	7	102105376	102113564	245	0.306531	0.0379292	0.0650659	0.976499
	LSG1	3	194361517	194393206	536	0.0973623	0.916036	0.283576	0.976499
	LSM12	17	42112003	42144987	360	0.240377	0.904457	0.404007	0.976499
	LSM4	19	18417040	18434084	387	0.663221	0.454295	0.71103	0.976499
	LSMEM1	7	112121073	112131117	405	0.102482	0.575567	0.206106	0.976499
	LSR	19	35739233	35758867	492	0.904278	0.21324	0.510816	0.976499
	LSS	21	47608055	47648738	480	0.747345	0.402691	0.671331	0.976499
	LST1	6	31553901	31556671	301	0.649627	0.196574	0.299052	0.976499
	LTB4R	14	24782517	24787242	507	0.47227	0.399885	0.588847	0.976499
	LTB4R2	14	24779346	24781259	504	0.763481	0.378555	0.627185	0.976499
	LTBP3	11	65306276	65326401	364	0.383692	0.0509444	0.135471	0.976499
	LTBR	12	6484391	6500729	464	0.126693	0.544989	0.213289	0.976499
	LY6D	8	143866296	143868008	410	0.428103	0.381594	0.446963	0.976499
	LY6G5B	6	31637944	31641553	244	0.276282	0.413034	0.354959	0.976499
	LY6G5C	6	31644461	31651817	244	0.32558	0.487923	0.487167	0.976499
	LY6K	8	143781529	143783669	401	0.335179	0.338419	0.292545	0.976499
	LY75	2	160659866	160761260	445	0.267111	0.78961	0.57701	0.976499
	LYAR	4	4269428	4291896	382	0.270635	0.234198	0.232865	0.976499
	LYG1	2	99900701	99921205	311	0.259052	0.892518	0.596463	0.976499
	LYNX1	8	143845752	143859640	409	0.266354	0.3521	0.265803	0.976499
	LYRM2	6	90277863	90348472	492	0.408546	0.0219319	0.0544863	0.976499
	LYRM9	17	26205340	26220409	312	0.732262	0.333338	0.646171	0.976499
	LYSMD1	1	151132226	151138424	319	0.805552	0.0353221	0.12966	0.976499
	LYSMD4	15	100260989	100273766	506	0.454019	0.137695	0.235735	0.976499
	MAG	19	35783028	35804707	495	0.753127	0.167154	0.40569	0.976499
	MAGOH2	17	10619319	10619828	500	0.16166	0.361166	0.307329	0.976499
	MAML1	5	179159851	179223253	442	0.157612	0.0990957	0.119844	0.976499
	MAN1B1	9	139981379	140003635	369	0.654264	0.200959	0.318576	0.976499
	MAN2C1	15	75648133	75660495	233	0.305616	0.725942	0.434959	0.976499
	MANBA	4	103553050	103682151	340	0.252878	0.03383	0.067927	0.976499
	MANBAL	20	35918041	35945663	329	0.379315	0.528008	0.545251	0.976499
	MAP1B	5	71403061	71505395	450	0.319977	0.883277	0.531382	0.976499
	MAP1LC3A	20	33134658	33148149	304	0.276289	0.298062	0.308539	0.976499
	MAP2K4	17	11924141	12047147	455	0.577998	0.0145872	0.0381426	0.976499
	MAP2K7	19	7968728	7979363	451	0.681411	0.268362	0.430674	0.976499
	MAP3K11	11	65365226	65381720	350	0.573601	0.0512318	0.159471	0.976499
	MAP3K3	17	61699775	61773261	277	0.229504	0.424397	0.391035	0.976499
	MAP9	4	156263810	156298122	451	0.232455	0.467392	0.428939	0.976499
	MAPK12	22	50687628	50700254	394	0.955275	0.286578	0.581774	0.976499
	MAPK8IP2	22	51039114	51052409	285	0.525812	0.563347	0.622468	0.976499
	MAPK9	5	179660143	179719099	444	0.919723	0.305001	0.625564	0.976499
	MAPRE1	20	31407699	31438211	428	0.777116	0.125757	0.344289	0.976499
	MAPT	17	43971748	44105700	32	0.729457	0.0810094	0.239743	0.976499
	2020-03-11	5	16067248	16180871	475	0.540543	0.211785	0.334185	0.976499
	2020-03-02	19	8478154	8503901	352	0.0626461	0.677542	0.181669	0.976499
	MARCKSL1P1	10	104935311	104935851	350	0.114419	0.457871	0.231057	0.976499
	MARK3	14	103851729	103970168	360	0.330429	0.482219	0.413546	0.976499
	MARVELD1	10	99472930	99477907	438	0.457516	0.38676	0.567853	0.976499
	MAST4-AS1	5	66297211	66299781	522	0.0382053	0.862615	0.0868357	0.976499
	MASTL	10	27444196	27475853	457	0.792531	0.439129	0.745597	0.976499
	MAT2B	5	162930120	162946342	465	0.330323	0.532522	0.486245	0.976499
	MBL1P	10	81664654	81710092	308	0.102678	0.682161	0.28599	0.976499
	MCCC1-AS1	3	182734043	182735596	422	0.281405	0.528585	0.444024	0.976499
	MCCC2	5	70883115	70954531	312	0.37295	0.543208	0.543813	0.976499
	MCFD2	2	47129009	47168994	556	0.0365127	0.583574	0.12025	0.976499
	MCM3AP	21	47656743	47706211	464	0.145087	0.434339	0.172981	0.976499
	MCM3AP-AS1	21	47649131	47679304	480	0.103861	0.558975	0.218506	0.976499
	MCM6	2	136597196	136633996	276	0.207081	0.920971	0.493654	0.976499
	MCM8	20	5931298	5975852	604	0.26735	0.28799	0.284768	0.976499
	MCOLN2	1	85391268	85462796	581	0.0564201	0.724813	0.1781	0.976499
	MCTP1	5	94039446	94620279	438	0.337931	0.409419	0.397356	0.976499
	MDGA1	6	37600284	37667082	482	0.863421	0.0506675	0.10216	0.976499
	MDH1	2	63815934	63834331	272	0.192426	0.614909	0.375978	0.976499
	MDK	11	46402306	46405375	241	0.173182	0.969757	0.45469	0.976499
	MDM1	12	68666223	68726161	532	0.736379	0.0377931	0.0937177	0.976499
	MED10	5	6371994	6378707	647	0.311523	0.0444257	0.0995779	0.976499
	MED19	11	57471186	57479681	385	0.184063	0.566133	0.354205	0.976499
	MED21	12	27175479	27219276	525	0.313688	0.771355	0.545744	0.976499
	MED25	19	50321546	50341895	357	0.249214	0.43179	0.354769	0.976499
	MED28P3	2	187229325	187229855	294	0.419243	0.44282	0.570149	0.976499
	MED4	13	48627459	48669267	364	0.446232	0.653762	0.698063	0.976499
	MEF2BNB	19	19287712	19303007	331	0.946013	0.0724104	0.243502	0.976499
	MEGF9	9	123363091	123476748	343	0.160943	0.589949	0.307865	0.976499
	MEIS3P1	17	15689932	15690889	332	0.48549	0.10801	0.235488	0.976499
	MEOX1	17	41717756	41739322	347	0.476291	0.351386	0.46317	0.976499
	MESDC2	15	81239667	81282219	463	0.229071	0.33077	0.204454	0.976499
	MESP2	15	90303822	90321982	401	0.207088	0.837006	0.509214	0.976499
	METAP1	4	99916771	99983964	504	0.205672	0.634478	0.348611	0.976499
	Metazoa_SRP	21	47955709	47956003	337	0.388993	0.2234	0.380005	0.976499
	METTL10	10	126436718	126480439	563	0.239815	0.754178	0.514674	0.976499
	METTL15	11	28129856	28355054	299	0.0306322	0.588997	0.089957	0.976499
	METTL21A	2	208445355	208490652	403	0.529271	0.583898	0.733314	0.976499
	METTL21B	12	58165389	58176324	355	0.608521	0.130489	0.260796	0.976499
	METTL2B	7	128116783	128146656	385	0.803277	0.344894	0.645398	0.976499
	METTL4	18	2537524	2571508	514	0.227314	0.433739	0.403959	0.976499
	MFAP2	1	17300997	17307330	343	0.0890307	0.742414	0.261414	0.976499
	MFAP3	5	153418497	153600038	550	0.556428	0.369171	0.597195	0.976499
	MFF	2	228189881	228222550	535	0.921376	0.251912	0.581691	0.976499
	MFN1	3	179065480	179112719	350	0.624018	0.409346	0.652041	0.976499
	MFN2	1	12040238	12073571	450	0.409619	0.7136	0.703475	0.976499
	MGA	15	41913422	42062141	413	0.431377	0.526468	0.620328	0.976499
	MGAT5B	17	74864538	74946398	545	0.446934	0.346418	0.477666	0.976499
	MGC10955	2	74361599	74362521	359	0.633077	0.342773	0.471449	0.976499
	MGME1	20	17949624	17971765	567	0.0673045	0.304594	0.102433	0.976499
	MICA	6	31371356	31383092	242	0.836517	0.24656	0.460133	0.976499
	MICB	6	31462658	31478901	279	0.46542	0.185674	0.189949	0.976499
	MICE	6	29709508	29713011	42	0.245162	0.781434	0.481479	0.976499
	MICU3	8	16884747	16980153	611	0.367927	0.400968	0.482706	0.976499
	MIEF1	22	39895437	39914137	395	0.937458	0.161525	0.442428	0.976499
	MIER1	1	67390578	67454302	548	0.0423333	0.13362	0.0594236	0.976499
	MIF	22	24236191	24236612	421	0.353042	0.162266	0.235161	0.976499
	MIPEP	13	24304328	24463558	761	0.30962	0.173099	0.251317	0.976499
	MIR29B1	7	130561495	130598069	393	0.426487	0.187422	0.267106	0.976499
	MIR3916	1	247353153	247372795	465	0.0617271	0.227428	0.0721012	0.976499
	MITD1	2	99777890	99797521	303	0.464348	0.593127	0.633319	0.976499
	MIXL1	1	226411319	226414755	407	0.336497	0.16784	0.24639	0.976499
	MKKS	20	10381657	10414870	578	0.698351	0.151467	0.327718	0.976499
	MKLN1-AS2	7	130994503	131012981	494	0.675767	0.47657	0.693573	0.976499
	MKRN2	3	12598513	12625099	469	0.70157	0.269103	0.457972	0.976499
	MLF1IP	4	185616118	185655287	526	0.0935132	0.262285	0.162066	0.976499
	MLH1	3	37034823	37107300	403	0.730808	0.00967923	0.0392225	0.976499
	MLKL	16	74705753	74734858	372	0.994326	0.288587	0.646902	0.976499
	MLLT10P1	20	29637799	29638060	100	0.3607	0.149926	0.152362	0.976499
	MLLT4	6	168227602	168372703	471	0.863968	0.371066	0.620964	0.976499
	MLST8	16	2254249	2259253	358	0.3704	0.461932	0.458312	0.976499
	MLXIPL	7	73007524	73038873	251	0.878055	0.140697	0.392614	0.976499
	MMAB	12	109991542	110011679	442	0.309718	0.622082	0.505298	0.976499
	MMP16	8	89044237	89340254	295	0.318058	0.0443956	0.0645618	0.976499
	MMP23A	1	1631369	1633249	304	0.664076	0.448327	0.615807	0.976499
	MMP24-AS1	20	33804265	33865934	344	0.929307	0.165501	0.441006	0.976499
	MMP27	11	102562218	102576537	518	0.294107	0.532438	0.491401	0.976499
	MMS19	10	99218081	99258551	500	0.714086	0.38172	0.660348	0.976499
	MOGS	2	74688184	74692537	381	0.831967	0.345135	0.67865	0.976499
	MORC2	22	31322642	31364284	381	0.94238	0.310443	0.630533	0.976499
	MORN4	10	99374310	99393344	478	0.235952	0.514347	0.350101	0.976499
	MOV10L1	22	50528308	50600119	407	0.970859	0.122514	0.304163	0.976499
	MPI	15	75182346	75191798	277	0.304224	0.520699	0.521718	0.976499
	MPND	19	4343524	4360083	370	0.863422	0.173762	0.438416	0.976499
	MPP5	14	67707826	67802536	394	0.275347	0.0950038	0.126912	0.976499
	MPPE1	18	11885685	11908710	453	0.032457	0.547378	0.0863784	0.976499
	MPV17L	16	15489611	15507125	244	0.171906	0.86172	0.402292	0.976499
	MPV17L2	19	18303992	18307552	417	0.362064	0.851957	0.665816	0.976499
	MPZL3	11	118097409	118123065	544	0.675246	0.354008	0.618066	0.976499
	MRE11A	11	94152895	94226072	439	0.228168	0.339312	0.347711	0.976499
	MRGPRD	11	68747490	68748455	416	0.495571	0.467898	0.484326	0.976499
	MRI1	19	13875346	13884981	331	0.337508	0.787573	0.647535	0.976499
	MROH6	8	144648357	144655141	358	0.685395	0.0564029	0.138945	0.976499
	MROH8	20	35729629	35807991	317	0.226946	0.666277	0.360375	0.976499
	MRPL10	17	45900638	45908900	383	0.928614	0.23411	0.480426	0.976499
	MRPL14	6	44081194	44095194	558	0.356476	0.155853	0.251573	0.976499
	MRPL18	6	160210844	160219468	560	0.681403	0.354146	0.591697	0.976499
	MRPL23-AS1	11	2004467	2011150	479	0.551252	0.461764	0.635816	0.976499
	MRPL34	19	17403641	17417652	424	0.100195	0.214846	0.125638	0.976499
	MRPL35	2	86426478	86440917	450	0.282964	0.367662	0.337845	0.976499
	MRPL38	17	73894724	73901494	392	0.204081	0.730951	0.357972	0.976499
	MRPL41	9	140445651	140447007	337	0.938598	0.263013	0.462826	0.976499
	MRPL43	10	102729215	102747123	420	0.290654	0.151739	0.251512	0.976499
	MRPL45P2	17	45527934	45569858	358	0.146842	0.630292	0.269529	0.976499
	MRPL51	12	6601150	6602521	384	0.779861	0.294134	0.609211	0.976499
	MRPL54	19	3762662	3768573	350	0.594303	0.570836	0.679314	0.976499
	MRPS10	6	42174539	42185603	415	0.716702	0.0808215	0.233058	0.976499
	MRPS18AP1	3	48297840	48298076	251	0.376279	0.770791	0.704117	0.976499
	MRPS21	1	150266289	150281414	250	0.505439	0.432093	0.642002	0.976499
	MRPS26	20	3026591	3028900	446	0.661702	0.0872841	0.184637	0.976499
	MRPS30	5	44809027	44820530	229	0.721329	0.15195	0.321546	0.976499
	MRPS33	7	140705854	140715028	400	0.582231	0.351678	0.6044	0.976499
	MRPS7	17	73257886	73262308	377	0.522266	0.446146	0.647641	0.976499
	MRS2	6	24403153	24425810	620	0.307104	0.528047	0.436714	0.976499
	MSANTD4	11	105866350	105893130	374	0.880552	0.361082	0.620234	0.976499
	MSH2	2	47630108	47789450	479	0.0659418	0.759322	0.177566	0.976499
	MSH3	5	79950971	80172279	481	0.779657	0.433688	0.702667	0.976499
	MSH4	1	76262567	76378923	463	0.10593	0.995984	0.226166	0.976499
	MSI1	12	120779133	120806983	385	0.353599	0.490356	0.448094	0.976499
	MSL1	17	38278551	38293042	305	0.7668	0.535742	0.681491	0.976499
	MST1L	1	17081405	17096732	291	0.201837	0.214692	0.15091	0.976499
	MST1P2	1	16972069	16976914	261	0.397149	0.128036	0.271276	0.976499
	MSTO2P	1	155715620	155719422	236	0.393675	0.833149	0.71292	0.976499
	MT1A	16	56672578	56673999	533	0.948523	0.0315782	0.119533	0.976499
	MTAP	9	21802542	21931646	445	0.161919	0.66921	0.34833	0.976499
	MTBP	8	121457662	121554373	434	0.217643	0.385863	0.314882	0.976499
	MTERFD2	2	242011584	242041747	449	0.668649	0.0592169	0.188001	0.976499
	MTFR1	8	66556969	66683496	366	0.0401214	0.920265	0.10791	0.976499
	MTFR1L	1	26145131	26159432	375	0.545393	0.341091	0.471453	0.976499
	MTG1	10	135207598	135234169	342	0.940617	0.421743	0.672684	0.976499
	MTG2	20	60758085	60778624	506	0.211229	0.224154	0.118071	0.976499
	MTHFR	1	11845780	11866977	483	0.338972	0.911565	0.685188	0.976499
	MTIF2	2	55463731	55496483	492	0.19834	0.812078	0.362374	0.976499
	MTMR11	1	149900543	149908791	139	0.33456	0.771605	0.618424	0.976499
	MTMR3	22	30279144	30426855	396	0.849381	0.187891	0.400872	0.976499
	MTMR6	13	25802307	25862147	500	0.604613	0.417205	0.587538	0.976499
	MTND5P28	2	120972757	120974855	327	0.187629	0.769082	0.436198	0.976499
	MTO1	6	74171301	74218959	378	0.0815224	0.119731	0.0796644	0.976499
	MTRF1L	6	153308497	153323820	547	0.429829	0.469838	0.508441	0.976499
	MTRNR2L12	3	96335981	96337000	237	0.227608	0.158127	0.17707	0.976499
	MTSS1	8	125563031	125740730	511	0.255759	0.342915	0.362403	0.976499
	MTSS1L	16	70695107	70719969	153	0.414093	0.564564	0.647405	0.976499
	MUL1	1	20825943	20834654	510	0.370947	0.642	0.594038	0.976499
	MUT	6	49398073	49430904	347	0.474256	0.500048	0.633863	0.976499
	MVB12A	19	17529890	17544533	440	0.414599	0.314608	0.405254	0.976499
	MVB12B	9	129089128	129269320	494	0.422125	0.602205	0.613792	0.976499
	MVP	16	29831715	29859355	157	0.626929	0.365378	0.483502	0.976499
	MX1	21	42792231	42831141	639	0.891959	0.0225439	0.0751563	0.976499
	MXD3	5	176732501	176739758	311	0.096533	0.403042	0.177834	0.976499
	MXRA7	17	74669741	74707098	526	0.422973	0.379891	0.448858	0.976499
	MYCBPAP	17	48585745	48608862	473	0.894925	0.0440417	0.129336	0.976499
	MYEOV	11	69061605	69182494	446	0.893238	0.171109	0.436827	0.976499
	MYH3	17	10531843	10560626	524	0.306555	0.353639	0.42146	0.976499
	MYH7B	20	33563206	33590206	352	0.112052	0.0484659	0.064329	0.976499
	MYLK4	6	2663863	2751200	586	0.108627	0.165204	0.139496	0.976499
	MYLKP1	3	75377700	75388222	148	0.0926733	0.048168	0.0577992	0.976499
	MYO10	5	16665395	16936372	537	0.352513	0.179896	0.265769	0.976499
	MYO15A	17	18012020	18083116	325	0.7858	0.252807	0.451656	0.976499
	MYO19	17	34851668	34899284	321	0.382665	0.93676	0.748888	0.976499
	MYO3A	10	26223196	26501456	528	0.414962	0.688008	0.703069	0.976499
	MYO5A	15	52599480	52821247	441	0.604214	0.156113	0.374166	0.976499
	MYO6	6	76458909	76629254	331	0.0942126	0.807071	0.227123	0.976499
	MYO7B	2	128293378	128395303	416	0.597441	0.281545	0.503241	0.976499
	MYOC	1	171604557	171621823	540	0.453793	0.184865	0.284739	0.976499
	MYOM2	8	1993155	2113475	681	0.0302019	0.505128	0.0912174	0.976499
	MZT2A	2	132222473	132250316	166	0.935755	0.486436	0.748152	0.976499
	NAA60	16	3493611	3536963	348	0.894612	0.204041	0.502132	0.976499
	NAAA	4	76831809	76862102	451	0.244599	0.856622	0.434476	0.976499
	NAGLU	17	40688190	40696467	248	0.61503	0.402729	0.557906	0.976499
	NAP1L5	4	89617066	89619386	404	0.971566	0.0827316	0.237355	0.976499
	NAPG	18	10525902	10552757	676	0.616651	0.273144	0.47193	0.976499
	NAPRT1	8	144656966	144660783	359	0.0880115	0.122987	0.0968922	0.976499
	NAPSB	19	50837057	50848018	401	0.205128	0.395626	0.369328	0.976499
	NARF	17	80416056	80448413	402	0.922937	0.241574	0.571676	0.976499
	NARS2	11	78147007	78285919	455	0.0632638	0.471865	0.172943	0.976499
	NAT6	3	50333833	50336852	329	0.750283	0.0609336	0.101499	0.976499
	NAV2	11	19372271	20143144	575	0.106389	0.371585	0.210981	0.976499
	NBEAL2	3	47021173	47051193	290	0.890192	0.532115	0.75248	0.976499
	NBN	8	90945564	91015456	374	0.225991	0.725039	0.488892	0.976499
	NBPF1	1	16888814	16940057	276	0.0187187	0.409932	0.060325	0.976499
	NBPF2P	1	21751118	21754460	377	0.459288	0.367469	0.466137	0.976499
	NBPF3	1	21766621	21811498	380	0.556826	0.330031	0.481125	0.976499
	NBR1	17	41322498	41363708	291	0.284599	0.532965	0.429488	0.976499
	NBR2	17	41277627	41305688	284	0.261291	0.480954	0.350028	0.976499
	NCKIPSD	3	48701364	48723797	265	0.291363	0.954464	0.498888	0.976499
	NCLN	19	3185561	3209573	425	0.590178	0.316016	0.555844	0.976499
	NCOA6	20	33284722	33413452	348	0.0521536	0.558617	0.116611	0.976499
	NCOR1	17	15932471	16121499	300	0.164083	0.889962	0.397425	0.976499
	NDE1	16	15737124	15820210	411	0.628151	0.479396	0.729682	0.976499
	NDNF	4	121956768	121994176	472	0.152071	0.817135	0.376572	0.976499
	NDUFA10	2	240831867	240964819	559	0.192392	0.292467	0.241888	0.976499
	NDUFA11	19	5891287	5904017	383	0.498345	0.511732	0.67423	0.976499
	NDUFAF1	15	41679551	41694717	301	0.48911	0.439097	0.603095	0.976499
	NDUFAF4	6	97337189	97345757	405	0.555747	0.0289002	0.0860124	0.976499
	NDUFAF5	20	13765596	13799067	381	0.208014	0.107275	0.121497	0.976499
	NDUFB1	14	92582466	92588261	526	0.227449	0.905037	0.442214	0.976499
	NDUFB2	7	140396621	140406446	361	0.451941	0.191497	0.348169	0.976499
	NDUFC2	11	77779398	77791265	363	0.861976	0.0365478	0.127121	0.976499
	NDUFS2	1	161166894	161184185	375	0.0556856	0.450272	0.0686379	0.976499
	NDUFV3	21	44299754	44333414	609	0.0459047	0.226128	0.0839278	0.976499
	NEAT1	11	65190245	65213011	364	0.096246	0.256655	0.0666413	0.976499
	NEB	2	152341850	152591001	339	0.276968	0.9573	0.545576	0.976499
	NEDD4	15	56119120	56285944	374	0.961	0.20367	0.513708	0.976499
	NEIL2	8	11627148	11644855	477	0.647591	0.339564	0.627892	0.976499
	NEK1	4	170314426	170533780	340	0.403355	0.400822	0.426005	0.976499
	NEK3	13	52706775	52733996	340	0.496074	0.742246	0.729982	0.976499
	NEK4	3	52744800	52804965	395	0.214079	0.728788	0.482395	0.976499
	NEK5	13	52611093	52703214	332	0.434591	0.600644	0.556621	0.976499
	NELFB	9	140149625	140167998	361	0.501238	0.0288952	0.0507765	0.976499
	NELFCD	20	57556263	57570188	555	0.0289639	0.711737	0.0915135	0.976499
	NELFE	6	31919864	31926856	222	0.998523	0.351113	0.696194	0.976499
	NETO1	18	70409549	70535381	579	0.241137	0.368761	0.349406	0.976499
	NEU4	2	242750902	242758739	193	0.643145	0.337783	0.582148	0.976499
	NEURL1B	5	172068269	172118543	550	0.350271	0.868284	0.696649	0.976499
	NEXN	1	78381740	78409580	352	0.77173	0.390079	0.604411	0.976499
	NFATC2IP	16	28962128	28978418	188	0.704936	0.258491	0.430982	0.976499
	NFIC	19	3359561	3469215	409	0.436378	0.860728	0.74826	0.976499
	NFRKB	11	129733531	129765485	464	0.153886	0.319922	0.256943	0.976499
	NFXL1	4	47849257	47916158	412	0.181192	0.224232	0.126787	0.976499
	NFYA	6	41040684	41067715	570	0.0479813	0.621462	0.139908	0.976499
	NFYC	1	41157739	41237275	423	0.140137	0.627415	0.333952	0.976499
	NGEF	2	233743419	233877982	457	0.187922	0.375031	0.300889	0.976499
	NINJ1	9	95883771	95896570	432	0.610397	0.318695	0.440903	0.976499
	NIPAL1	4	47916223	48042188	412	0.884883	0.068813	0.197155	0.976499
	NIPAL2	8	99202061	99306621	458	0.073315	0.139753	0.0742102	0.976499
	NIPAL4	5	156887087	156901725	522	0.772695	0.390515	0.615561	0.976499
	NIPSNAP1	22	29950797	29977326	392	0.363983	0.257137	0.395482	0.976499
	NIPSNAP3A	9	107509969	107522403	605	0.686461	0.426394	0.589433	0.976499
	NISCH	3	52489134	52527087	365	0.23704	0.799696	0.525966	0.976499
	NIT1	1	161087902	161095235	401	0.0769479	0.518764	0.092682	0.976499
	NIT2	3	100053545	100075710	369	0.591077	0.745665	0.751705	0.976499
	NKX6-1	4	85413140	85419603	315	0.639922	0.330834	0.562213	0.976499
	NLRC3	16	3589049	3627401	363	0.0460751	0.375414	0.0807715	0.976499
	NLRC4	2	32449522	32490923	309	0.679624	0.39867	0.534239	0.976499
	NLRP1	17	5402747	5522744	540	0.34216	0.206847	0.271619	0.976499
	NLRP2	19	55464498	55512510	482	0.184341	0.661119	0.414557	0.976499
	NLRP6	11	278365	285359	312	0.340326	0.957	0.643806	0.976499
	NMB	15	85198360	85201794	378	0.891593	0.264018	0.580119	0.976499
	NME1-NME2	17	49242796	49249108	443	0.210576	0.949595	0.528306	0.976499
	NME6	3	48334754	48343175	258	0.39197	0.838174	0.719483	0.976499
	NME8	7	37888199	37940003	591	0.418531	0.5561	0.473595	0.976499
	NMRK1	9	77675489	77703133	444	0.117936	0.224558	0.185199	0.976499
	NMT1	17	43129030	43186334	331	0.29097	0.960854	0.642288	0.976499
	NMUR1	2	232387871	232395206	353	0.534301	0.218305	0.405691	0.976499
	NOC3L	10	96075085	96122716	332	0.765273	0.148709	0.384267	0.976499
	NOL6	9	33461439	33473928	406	0.118854	0.410131	0.252143	0.976499
	NOMO1	16	14927538	14990017	123	0.0782623	0.950322	0.171686	0.976499
	NOMO3	16	16326352	16388668	349	0.16665	0.887324	0.39869	0.976499
	NOP16	5	175810949	175815976	312	0.717432	0.554722	0.72612	0.976499
	NOP56	20	2632791	2639039	576	0.958721	0.00964939	0.0422318	0.976499
	NOS2	17	26083792	26127525	304	0.540015	0.409497	0.629073	0.976499
	NOSTRIN	2	169643049	169722024	575	0.414109	0.85325	0.72644	0.976499
	NOTCH4	6	32162620	32191844	163	0.373609	0.687703	0.646904	0.976499
	NOXA1	9	140317802	140328815	360	0.599802	0.256816	0.387609	0.976499
	NOXRED1	14	77860364	77889860	575	0.292205	0.617073	0.531957	0.976499
	NPC1	18	21086148	21166862	364	0.872793	0.260902	0.485687	0.976499
	NPEPPS	17	45600308	45700642	366	0.240166	0.665365	0.426908	0.976499
	NPHP3	3	132297901	132441303	402	0.030006	0.302093	0.065764	0.976499
	NPHP4	1	5922871	6052422	510	0.424923	0.256394	0.439258	0.976499
	NPIPA2	16	14841923	14859270	147	0.0794541	0.840334	0.217039	0.976499
	NPIPB4	16	21845890	21877629	150	0.395445	0.0280564	0.0687733	0.976499
	NPIPP1	16	15198178	15217355	102	0.452683	0.598499	0.657524	0.976499
	NPLOC4	17	79523913	79604172	319	0.401197	0.632801	0.580367	0.976499
	NPM1P26	10	98319942	98320679	473	0.0784332	0.997571	0.176648	0.976499
	NQO2	6	2994165	3019996	683	0.445071	0.0371063	0.0967427	0.976499
	NR1D2	3	23986751	24022109	504	0.781159	0.0285918	0.0628836	0.976499
	NRBP1	2	27650657	27665126	300	0.05813	0.763887	0.192866	0.976499
	NRD1	1	52254890	52344477	207	0.446264	0.621851	0.655234	0.976499
	NRXN2	11	64373646	64490660	361	0.0367145	0.545161	0.0737598	0.976499
[truncated: 2,867 more rows]

## Sheet: SupplTable3.2
	Supplementary Table 3.2 Interactions between genes and age at first fullterm pregnancy (by 5 years old)
						P-values
	Gene Name	Chromosome	Start	End	# of SNPs	Fixed effect	Random Effect	Adaptive Weighted	FDR-Corrected Adaptive Weighted
	C13orf45	13	76445187	76457947	580	0.624141	1.03196e-06	4.43558e-06	0.0217033
	RP11-173B14.5	13	76178964	76210130	562	0.00494578	0.00142041	0.000264468	0.647021
	AC004540.5	7	26438213	26538594	493	0.721895	0.000473365	0.00181465	0.754237
	ACAD9	3	128598439	128634910	356	0.00622166	0.13758	0.0051807	0.754237
	ADHFE1	8	67344718	67383675	305	0.00553484	0.505613	0.0104937	0.754237
	AMPH	7	38423305	38671167	547	0.262506	0.0113338	0.00735794	0.754237
	ANXA3	4	79472673	79531575	465	0.755879	0.00226574	0.00969509	0.754237
	ATAD3B	1	1407143	1431582	288	0.0238739	0.0112444	0.00722953	0.754237
	ATAD3C	1	1385069	1405538	292	0.0966194	0.00551619	0.00946441	0.754237
	B3GALT6	1	1167629	1170421	237	0.279715	0.0023756	0.0022632	0.754237
	C19orf55	19	36249044	36260766	429	0.457937	0.00764211	0.00935558	0.754237
	C1orf159	1	1017198	1051741	222	0.00120847	0.0795893	0.00237938	0.754237
	C8orf46	8	67372238	67430759	300	0.00429049	0.525398	0.00753361	0.754237
	CCDC104	2	55746740	55773015	442	0.377418	0.00220445	0.00842621	0.754237
	CPE	4	166282346	166419472	449	0.410452	0.00266327	0.0103513	0.754237
	CPSF3L	1	1247058	1260071	261	0.653958	0.0014332	0.00571983	0.754237
	CTB-75G16.3	17	34990527	34991156	317	0.00111844	0.719216	0.00415244	0.754237
	CYP27C1	2	127941696	127977654	470	0.186102	0.00665208	0.00259216	0.754237
	DNALI1	1	38022520	38032416	452	0.0719997	0.0103221	0.00983139	0.754237
	DSTYK	1	205111632	205180727	596	0.0038025	0.461619	0.00969838	0.754237
	ENC1	5	73923234	73937249	540	0.722139	0.000996344	0.00468468	0.754237
	FAM134A	2	220041054	220050201	375	0.00662073	0.0794665	0.00285263	0.754237
	FHL3	1	38462442	38471278	465	0.00240305	0.441172	0.00732925	0.754237
	GLB1L	2	220101392	220110176	398	0.0233924	0.0321604	0.0087728	0.754237
	GPD1L	3	32147181	32210205	522	0.0501364	0.0108992	0.00702224	0.754237
	JAKMIP3	10	133918175	133998313	493	0.00415697	0.150314	0.00195422	0.754237
	KCNMB3	3	178960552	178984790	364	0.0822885	0.00641736	0.0103587	0.754237
	KIAA1715	2	176788620	176867567	449	0.806301	0.00282325	0.00911479	0.754237
	KLHL2	4	166128770	166244308	482	0.00321857	0.183036	0.00505066	0.754237
	LDLRAP1	1	25870071	25895377	347	0.830281	0.00238625	0.00983454	0.754237
	LINC00115	1	761586	762902	162	0.543229	0.000709931	0.00212803	0.754237
	MEAF6	1	37958176	37980375	450	0.78523	0.00246593	0.0107838	0.754237
	MKRN7P	20	45092541	45093763	548	0.178894	0.00295818	0.00404072	0.754237
	MRPL20	1	1337427	1342693	280	0.242455	0.00556068	0.0071884	0.754237
	MS4A4A	11	60048014	60076445	414	0.117132	0.0157573	0.00948793	0.754237
	MYBL1	8	67474410	67525529	261	0.00607281	0.338993	0.00673976	0.754237
	OXR1	8	107371704	107764922	418	0.0151569	0.208726	0.00744578	0.754237
	PIGN	18	59710800	59854351	511	0.0648169	0.00966114	0.00584819	0.754237
	PLEKHN1	1	901877	910488	187	0.023391	0.012833	0.00770632	0.754237
	PPFIA2	12	81652045	82153332	387	0.160158	0.00304401	0.00505813	0.754237
	PRORSD1P	2	55509455	55511658	492	0.116468	0.00409445	0.00809689	0.754237
	PRR5L	11	36317838	36486754	611	0.00332471	0.0620538	0.00564985	0.754237
	PUSL1	1	1243947	1246976	257	0.202258	0.00435098	0.00294769	0.754237
	RABGAP1L	1	174128548	174964445	278	0.671842	0.00295737	0.00893003	0.754237
	RGS1	1	192544857	192549161	366	0.00107772	0.452499	0.00274148	0.754237
	RNF223	1	1006346	1009687	215	0.758683	0.0021456	0.00737473	0.754237
	RP11-100L22.1	8	93681064	93691822	347	0.462405	0.00502881	0.0101019	0.754237
	RP11-206L10.1	1	661611	663527	121	0.851017	0.000299414	0.00107754	0.754237
	RP11-222A11.1	10	67330096	67526299	547	0.00206599	0.416373	0.00740296	0.754237
	RP11-422J8.1	1	37920480	37940012	437	0.521191	0.00194049	0.00683423	0.754237
	RP11-488L18.3	1	247347115	247348784	467	0.00142411	0.763303	0.00653542	0.754237
	RP11-521J24.1	13	81617805	81618577	435	0.118664	0.0197832	0.00847739	0.754237
	RP11-54O7.17	1	931346	933431	190	0.000444751	0.341437	0.00115384	0.754237
	RP11-672L10.6	18	813275	813757	597	0.00277389	0.795689	0.00964994	0.754237
	RP3-449M8.6	14	74940710	74941567	371	0.00452403	0.407512	0.0102586	0.754237
	RP5-1180C10.2	1	180238788	180243247	452	0.179539	0.00635395	0.0101831	0.754237
	RP5-828H9.1	20	5451853	5455828	578	0.904483	0.0025993	0.0102795	0.754237
	S100A9	1	153330330	153333503	470	0.364303	0.00335636	0.00332236	0.754237
	SCNN1D	1	1215816	1227409	253	0.567548	0.00314337	0.0109444	0.754237
	SERPINC1	1	173872947	173886516	262	0.00402476	0.299278	0.0109319	0.754237
	SMAD5	5	135468534	135524435	455	0.244752	0.00537915	0.0086898	0.754237
	SMYD5	2	73441350	73454365	279	0.00161955	0.156931	0.00152372	0.754237
	SNORA12	2	55792839	55792986	445	0.0464406	0.00867184	0.010523	0.754237
	SNX10	7	26331541	26413949	510	0.676751	0.000646877	0.00218698	0.754237
	TBCE	1	235530675	235612283	324	0.00229318	0.46688	0.00897255	0.754237
	TNFRSF18	1	1138888	1142071	234	0.300162	0.00415359	0.00732747	0.754237
	TPTEP1	22	17082777	17179632	207	0.000529673	0.208315	0.000640073	0.754237
	TTLL10-AS1	1	1108436	1114935	230	0.930162	0.00225957	0.00862183	0.754237
	ZNF334	20	45129701	45142198	558	0.0231533	0.00818638	0.00345606	0.754237
	ZNF663P	20	45042867	45087915	549	0.0375149	0.00635078	0.00335024	0.754237
	ZNF840	20	45113100	45121279	560	0.0720449	0.00412638	0.00390477	0.754237
	HLCS	21	38123189	38362536	459	0.00264841	0.673687	0.0116015	0.777621
	KLHL17	1	895967	901095	187	0.059575	0.0115209	0.0114737	0.777621
	MS4A14	11	60163775	60185161	459	0.0040264	0.461525	0.0117662	0.778001
	FNTB	14	65453438	65529316	474	0.0623762	0.0462305	0.0119727	0.781096
	AC012358.8	2	55535628	55573185	488	0.995188	0.00253024	0.0122375	0.785777
	RP4-758J18.7	1	1357849	1358071	293	0.277368	0.00475763	0.0123656	0.785777
	ANKRD65	1	1353800	1357149	293	0.443799	0.00423228	0.0146376	0.788644
	CDH8	16	61681146	62070939	367	0.00471793	0.394781	0.014648	0.788644
	CTD-2366F13.1	5	52405672	52410956	557	0.588389	0.00579104	0.0139402	0.788644
	FUS	16	31191431	31203127	248	0.133336	0.00565516	0.0131226	0.788644
	GGNBP2	17	34900737	34946278	321	0.00363754	0.717443	0.0143199	0.788644
	LINC00610	11	36290834	36294909	606	0.291866	0.0045549	0.0129942	0.788644
	MARCO	2	119699742	119752236	530	0.00405401	0.319203	0.0135183	0.788644
	RP11-103G8.2	3	150421830	150437933	409	0.744506	0.00331459	0.0144725	0.788644
	RP11-54D18.2	9	14993310	15019727	664	0.0832173	0.0123193	0.0133989	0.788644
	S100A8	1	153362508	153363664	469	0.283833	0.0130358	0.0131363	0.788644
	SDHDP6	1	25620655	25621134	374	0.00330883	0.729583	0.0146672	0.788644
	TMEM230	20	5080486	5093749	609	0.00790848	0.189872	0.0135645	0.788644
	TTLL10	1	1114569	1133315	230	0.145434	0.0132762	0.0135826	0.788644
	U2AF1L4	19	36233365	36235882	436	0.272406	0.0186341	0.0137116	0.788644
	HNRNPCP7	7	63961203	63962107	329	0.00828617	0.239943	0.0148959	0.792236
	CHURC1	14	65381079	65411309	493	0.0518674	0.0539115	0.0150613	0.792419
	AC012358.7	2	55441523	55443262	505	0.0122024	0.0609828	0.0163686	0.801303
	AC094019.4	3	32192575	32193387	514	0.063543	0.0234882	0.0204969	0.801303
	ARHGEF5	7	144052381	144077725	339	0.00851619	0.418284	0.0200929	0.801303
	ATP5G3	2	176040986	176048942	355	0.00956886	0.520096	0.0184917	0.801303
	ATP5O	21	35275757	35288284	407	0.0652069	0.0392587	0.018967	0.801303
	CEP290	12	88444131	88535993	292	0.341951	0.00964019	0.0166788	0.801303
	CNOT6L	4	78634541	78740769	432	0.0126298	0.0684511	0.018059	0.801303
	CTC-203F4.2	5	134735313	134736986	516	0.573444	0.006398	0.0177456	0.801303
	KIAA1468	18	59854491	59974355	511	0.0097949	0.129329	0.0190202	0.801303
	LINC01088	4	79892902	80229952	332	0.833014	0.00564997	0.0199907	0.801303
	MAML1	5	179159851	179223253	442	0.00468251	0.735157	0.0201958	0.801303
	METTL6	3	15422782	15468142	377	0.00493434	0.694478	0.0206344	0.801303
	MORC2	22	31322642	31364284	381	0.0177282	0.187393	0.0192434	0.801303
	MRPL35P2	10	65394077	65394587	373	0.0136511	0.522543	0.0181448	0.801303
	MTFR1L	1	26145131	26159432	375	0.037748	0.0202533	0.0173841	0.801303
	NINJ1	9	95883771	95896570	432	0.877446	0.00489756	0.0202098	0.801303
	RCN2	15	77223960	77242601	234	0.0785147	0.0223326	0.0172181	0.801303
	RHCE	1	25688853	25756683	386	0.0234608	0.0376285	0.018135	0.801303
	RP11-1277A3.2	5	177047474	177099210	242	0.953815	0.00366035	0.0167017	0.801303
	RP11-290F20.3	20	48884023	48896332	439	0.0579596	0.0174642	0.0162149	0.801303
	RP11-297H3.4	1	170240744	170253349	425	0.0637925	0.03229	0.0190022	0.801303
	RP11-554J4.1	2	55845114	55845200	432	0.175948	0.010538	0.0204399	0.801303
	RP11-723O4.2	3	128580156	128590383	360	0.209664	0.00586321	0.0162742	0.801303
	RP11-723O4.9	3	128578559	128579369	359	0.471637	0.0054103	0.0203267	0.801303
	RP13-270P17.2	18	3190395	3247275	491	0.00985436	0.818206	0.0170053	0.801303
	RP3-465N24.5	1	25592593	25593627	360	0.00399575	0.801082	0.0180658	0.801303
	SCAPER	15	76640526	77197785	233	0.00903342	0.124663	0.0181631	0.801303
	SNHG17	20	37049235	37063996	478	0.00571135	0.354136	0.0189384	0.801303
	TRABD2A	2	85048774	85134132	396	0.0153793	0.104609	0.0203091	0.801303
	VPS13C	15	62144588	62352672	542	0.0332429	0.0343696	0.0176432	0.801303
	ZNF107	7	64126511	64171404	285	0.0771736	0.0681821	0.0203648	0.801303
	ZNF565	19	36673188	36737159	330	0.851149	0.00896516	0.0196697	0.801303
	ZNF639	3	179040779	179053323	365	0.3328	0.00583972	0.0189418	0.801303
	DMPK	19	46273065	46285810	391	0.00885304	0.885921	0.0213932	0.801808
	GAA	17	78075355	78093678	437	0.155181	0.0329741	0.0214667	0.801808
	NSA2	5	74064756	74072737	476	0.129529	0.0103712	0.0208126	0.801808
	RRAS2	11	14299472	14386052	378	0.0596402	0.0424524	0.0209831	0.801808
	TSPYL5	8	98285717	98290176	381	0.0051597	0.726382	0.0212837	0.801808
	CLHC1	2	55401927	55459490	506	0.171148	0.01422	0.0224105	0.805518
	COQ5	12	120941077	120972153	408	0.0167884	0.425101	0.0231062	0.805518
	ENPP3	6	131949582	132068553	395	0.0231077	0.231684	0.023725	0.805518
	FLCN	17	17115526	17140496	397	0.00579995	0.518718	0.0222211	0.805518
	KIAA1755	20	36838890	36889174	498	0.0287184	0.318686	0.0223734	0.805518
	MED21	12	27175479	27219276	525	0.0328767	0.0650949	0.0236344	0.805518
	MSH4	1	76262567	76378923	463	0.012805	0.215644	0.0221334	0.805518
	MYO19	17	34851668	34899284	321	0.00677009	0.653887	0.0233501	0.805518
	RHD	1	25598884	25656936	361	0.00516294	0.785569	0.0228596	0.805518
	RP11-294O2.2	4	165675216	165724947	430	0.279733	0.00746222	0.0227992	0.805518
	RP11-370F5.4	9	95909322	95910838	430	0.00696162	0.416813	0.023513	0.805518
	RP11-797A18.4	15	77334178	77335533	241	0.347631	0.0075661	0.0242001	0.805518
	RPS6KL1	14	75372346	75390099	378	0.00555805	0.710015	0.0238501	0.805518
	TBC1D9B	5	179289066	179334859	441	0.289624	0.0266571	0.0241941	0.805518
	ZBTB32	19	36195429	36207940	446	0.632471	0.00942629	0.0231652	0.805518
	ZNF98	19	22573821	22715287	309	0.00683266	0.653187	0.0241523	0.805518
	EIF2B2	14	75469614	75476292	414	0.00609281	0.76848	0.0246582	0.805606
	INPP5B	1	38326764	38412729	461	0.778919	0.0061129	0.0247731	0.805606
	OR51E1	11	4664650	4676718	710	0.0128823	0.751675	0.0248613	0.805606
	SETD9	5	56205087	56221359	495	0.0326602	0.049687	0.0245562	0.805606
	RP11-290F20.1	20	48909257	48931459	431	0.489023	0.0142793	0.0250368	0.805954
	ITGA1	5	52083730	52255040	581	0.857423	0.00934133	0.0258291	0.826025
	NDNF	4	121956768	121994176	472	0.00895523	0.286588	0.0260504	0.827692
	ARSA	22	51061182	51066607	260	0.0560513	0.17235	0.0263758	0.830109
	GPIHBP1	8	144295068	144299044	396	0.00623072	0.944728	0.0266712	0.830109
	MED15	22	20850200	20941782	344	0.0119419	0.913105	0.0267757	0.830109
	TSPAN3	15	77336359	77376326	255	0.459288	0.00809429	0.0268051	0.830109
	RALGAPA1	14	36007558	36278510	402	0.766153	0.0068063	0.0269809	0.830298
	KLHDC7A	1	18807424	18812478	653	0.251209	0.0297978	0.0274414	0.832292
	LRRC37A6P	10	27535279	27548384	453	0.249226	0.0235686	0.0280663	0.832292
	MTIF2	2	55463731	55496483	492	0.0535223	0.0417187	0.027811	0.832292
	RNF40	16	30774439	30787628	208	0.347283	0.0089305	0.0279144	0.832292
	S100A16	1	153579362	153585621	409	0.0360966	0.170554	0.0276568	0.832292
	UPK1A	19	36157715	36169367	455	0.212419	0.0210152	0.0280564	0.832292
	RP11-551L14.1	12	31264586	31359088	470	0.00939932	0.307648	0.0286297	0.843885
	MFN1	3	179065480	179112719	350	0.598425	0.00785886	0.0288853	0.843941
	RP11-996F15.2	12	29433351	29470781	597	0.076387	0.123472	0.0290783	0.843941
	TOX4	14	21944833	21967168	562	0.229981	0.014488	0.029149	0.843941
	METTL18	1	169761670	169764107	560	0.119036	0.0237359	0.0294636	0.848033
	ESPNL	2	239008798	239041928	492	0.0102569	0.290044	0.030261	0.85373
	MCTP1	5	94039446	94620279	438	0.402227	0.0105037	0.0305264	0.85373
	POU3F1	1	38509523	38512450	461	0.65471	0.00811292	0.030534	0.85373
	RALGDS	9	135973107	136024721	575	0.0449939	0.079673	0.0304565	0.85373
	RP11-147L13.8	17	66186025	66188943	342	0.0101169	0.615373	0.0302034	0.85373
	CD40	20	44746911	44758502	499	0.261841	0.0265641	0.0319439	0.856178
	FOXN2	2	48541776	48606433	360	0.00757604	0.651611	0.031231	0.856178
	RP11-148L24.1	4	175015811	175141549	438	0.190864	0.016434	0.0320214	0.856178
	RP11-499O7.7	10	5037680	5039572	641	0.0174464	0.295549	0.0315542	0.856178
	RP11-561N12.7	7	64139332	64147771	280	0.437859	0.0237238	0.0318594	0.856178
	SERGEF	11	17809595	18034709	489	0.132585	0.021884	0.0314052	0.856178
	SGSH	17	78180515	78194714	487	0.0173486	0.341748	0.0313948	0.856178
	VPS41	7	38762563	38971994	538	0.507723	0.0111463	0.0313773	0.856178
	CCDC122	13	44398045	44449063	533	0.345736	0.0127938	0.0324871	0.860481
	DUTP6	1	166837985	166838446	590	0.0240766	0.248256	0.0348202	0.860481
	FAM86C1	11	71498556	71512282	336	0.546012	0.0086166	0.0332001	0.860481
	HIPK1	1	114471941	114520426	471	0.0716201	0.0770954	0.0341717	0.860481
	IGLV5-52	22	22673082	22673581	356	0.0131823	0.266989	0.0338285	0.860481
	MASTL	10	27444196	27475853	457	0.353472	0.0205522	0.0331416	0.860481
	MRPL23-AS1	11	2004467	2011150	479	0.598222	0.00844996	0.0340112	0.860481
	RAB15	14	65412532	65439494	479	0.148041	0.0960967	0.0347072	0.860481
	RP11-338N10.1	1	7753184	7754904	464	0.0174649	0.173826	0.0346327	0.860481
	RP11-470E16.1	1	59597608	59664293	400	0.987201	0.00890072	0.0347977	0.860481
	RPF2	6	111303218	111349466	321	0.0616133	0.0361745	0.0336791	0.860481
	SRGAP2	1	206516200	206637783	281	0.0109136	0.385837	0.0346569	0.860481
	TCF7L1	2	85360533	85537511	412	0.889062	0.01086	0.0342895	0.860481
	Z83851.3	22	42665759	42671202	393	0.00878762	0.854346	0.0326347	0.860481
	ZNF280D	15	56922379	57210769	348	0.0119022	0.328339	0.033752	0.860481
	RP11-819C21.1	11	107182858	107186997	475	0.00926618	0.596949	0.0350934	0.860576
	SEC22A	3	122920774	122992977	439	0.0390174	0.052648	0.0351758	0.860576
	AC002398.13	19	36261653	36261930	431	0.834236	0.0159145	0.0354121	0.861426
	RP11-791G15.2	2	10908001	10910184	595	0.284848	0.015322	0.0355824	0.861426
	ZNF619	3	40518604	40531727	339	0.0138379	0.745404	0.0357387	0.861426
	CTD-2587M2.1	5	108572821	108662070	373	0.122067	0.0817725	0.0360718	0.861515
	NDUFAF5	20	13765596	13799067	381	0.109512	0.0353611	0.0363702	0.861515
	SLC25A37	8	23386318	23432976	581	0.0297175	0.100105	0.0362453	0.861515
	TELO2	16	1543345	1560427	499	0.0421226	0.0839342	0.0364467	0.861515
	TNFRSF1B	1	12227060	12269285	458	0.0214747	0.371051	0.0367065	0.863484
	FBXO38	5	147763498	147822399	458	0.0523126	0.121779	0.036897	0.863814
	ARL9	4	57371509	57390614	444	0.092334	0.0269082	0.0380607	0.868351
	CDHR3	7	105517242	105676877	520	0.0225218	0.264397	0.0377956	0.868351
	HDHD2	18	44634434	44676891	515	0.0786999	0.145055	0.0381517	0.868351
	LACC1	13	44453420	44468068	533	0.582648	0.0101734	0.0381135	0.868351
	RP11-16P6.1	2	223431624	223434438	465	0.031477	0.117717	0.0383331	0.868351
	RP11-412D9.4	12	107347807	107349275	411	0.685866	0.0220765	0.0379813	0.868351
	RP11-458F8.1	7	66313483	66323123	214	0.0105915	0.564752	0.0382195	0.868351
	A3GALT2	1	33772367	33786699	434	0.123499	0.0313932	0.0397516	0.874027
	CYB5RL	1	54638009	54665709	490	0.0103156	0.947181	0.0400665	0.874027
	DPY19L1P1	7	32620561	32801399	408	0.0143138	0.246169	0.0393471	0.874027
	EIF2A	3	150270141	150302029	435	0.722604	0.00981022	0.0391399	0.874027
	ENOX1	13	43787654	44361044	532	0.644231	0.010485	0.0394292	0.874027
	LRRK2	12	40590546	40763087	537	0.414433	0.0138633	0.0395619	0.874027
	RP11-797A18.6	15	77359996	77360667	251	0.380332	0.0124425	0.0391757	0.874027
	S100A1	1	153600402	153604509	408	0.0451263	0.21841	0.0401913	0.874027
	ZNF266	19	9523272	9546254	394	0.0103311	0.993772	0.040016	0.874027
	CLPP	19	6361463	6368919	404	0.10074	0.0386234	0.0410591	0.888948
	RP11-568K15.1	1	177975271	178007085	413	0.016226	0.319919	0.0412919	0.89005
	CAPNS1	19	36630477	36641255	334	0.288592	0.0249943	0.0420992	0.893742
	CCNB1	5	68462837	68474072	314	0.0144879	0.855316	0.0416583	0.893742
	CYP2D6	22	42522501	42526908	358	0.0180028	0.532904	0.0421938	0.893742
	RP11-799B12.4	18	21740742	21742007	494	0.983222	0.017917	0.0419367	0.893742
	LIME1	20	62367635	62370456	441	0.0421719	0.260687	0.0425356	0.897097
	CREG1	1	167498914	167523004	600	0.326899	0.0206533	0.0429385	0.901709
	TACC3	4	1723227	1746898	271	0.0407569	0.35538	0.0436882	0.907594
	TAF9	5	68646811	68665632	227	0.0114173	0.946193	0.0439607	0.907594
	VAMP4	1	171669300	171711387	512	0.02651	0.308365	0.0438657	0.907594
	ZNF177	19	9473696	9493293	404	0.0123872	0.988987	0.04364	0.907594
	LIN37	19	36239262	36245420	436	0.876048	0.018749	0.0443698	0.912192
	HINFP	11	118992297	119006752	380	0.0104499	0.911172	0.0452702	0.922088
	MYOC	1	171604557	171621823	540	0.0425666	0.130621	0.0454873	0.922088
	RP11-109N23.6	14	73427303	73428701	451	0.0179142	0.346087	0.0457935	0.922088
	RP11-165J3.6	9	96197614	96199403	493	0.190754	0.0211995	0.0456102	0.922088
	STK38L	12	27396901	27478892	494	0.471339	0.0155578	0.0451418	0.922088
	C1QTNF6	22	37576207	37595425	648	0.0975948	0.0522353	0.0466132	0.923394
	DLGAP2	8	1449532	1656642	670	0.137959	0.0926476	0.0463764	0.923394
	RN7SL832P	2	10830470	10832225	627	0.116025	0.0396889	0.0462213	0.923394
	ZNF559	19	9434448	9461838	406	0.012557	0.980789	0.0465852	0.923394
	NADSYN1	11	71164155	71235153	364	0.0522387	0.125391	0.0473818	0.934836
	TMC4	19	54663846	54676944	467	0.0219414	0.274558	0.0479262	0.941778
	DGCR6L	22	20301799	20307603	372	0.294408	0.0206804	0.0482408	0.944168
	CCDC77	12	498621	551811	390	0.272223	0.03521	0.0497179	0.948249
	CTD-2196P11.2	5	38682172	38685228	461	0.295856	0.0276386	0.0501576	0.948249
	CTD-2301A4.5	5	176692713	176693337	322	0.0585166	0.319527	0.0501934	0.948249
	PCBP1-AS1	2	70189398	70314567	371	0.928476	0.0118091	0.0499883	0.948249
	RP11-112L6.4	20	48789087	48793096	431	0.391307	0.0253634	0.0496514	0.948249
	RP11-950C14.7	14	75594048	75603633	417	0.0224828	0.361627	0.0490805	0.948249
	RP11-989F5.1	12	131295151	131296854	649	0.0196833	0.722301	0.0486457	0.948249
	RP4-756H11.3	7	66119525	66134842	238	0.985103	0.0113463	0.0492598	0.948249
	STX2	12	131274145	131323811	642	0.0241699	0.414974	0.050055	0.948249
	AC068282.3	2	128146706	128158156	440	0.551481	0.03046	0.0521211	0.951052
	ATP1B2	17	7549945	7561086	499	0.0134273	0.658885	0.0522855	0.951052
	LINC00649	21	35289317	35349992	406	0.783349	0.0127021	0.051537	0.951052
	PRDM4	12	108126643	108155049	466	0.298938	0.0278604	0.0515629	0.951052
	RMND1	6	151725989	151773259	569	0.938539	0.0136856	0.0521634	0.951052
	RNU6ATAC35P	1	220998962	220999389	405	0.0349702	0.37153	0.0509715	0.951052
	RP11-119B16.2	20	3868886	3869485	558	0.0148421	0.723861	0.05184	0.951052
	RP11-254F7.2	2	10179219	10180790	579	0.0415599	0.168548	0.0517377	0.951052
	RP5-943J3.1	1	90254473	90256051	376	0.0229006	0.25922	0.051733	0.951052
	S100A13	1	153591263	153603836	406	0.0448155	0.150599	0.0522512	0.951052
	C15orf57	15	40820882	40857256	334	0.301261	0.0191266	0.0527518	0.95598
	AP001347.6	21	15399742	15516789	332	0.0410391	0.405909	0.0546696	0.957869
	CYLD	16	50775961	50835846	434	0.0131333	0.839019	0.0544639	0.957869
	GJB5	1	35220648	35224113	408	0.0171978	0.403385	0.0530807	0.957869
	LA16c-390E6.4	16	1501761	1502654	481	0.0642399	0.102246	0.0539848	0.957869
	MCM8	20	5931298	5975852	604	0.0216246	0.341046	0.0550252	0.957869
	MED20	6	41873092	41888877	477	0.0135611	0.761369	0.0539003	0.957869
	MYO7B	2	128293378	128395303	416	0.0314987	0.363556	0.055401	0.957869
	NEK1	4	170314426	170533780	340	0.0145244	0.706823	0.0549191	0.957869
	RN7SKP16	1	33802167	33802465	443	0.428675	0.0187739	0.0545658	0.957869
	RP11-1277A3.1	5	177038254	177046755	236	0.943867	0.0128169	0.0552186	0.957869
	RP11-458F8.4	7	66367844	66371284	230	0.0169575	0.398956	0.0547845	0.957869
	XXbac-B444P24.8	22	20186252	20192441	371	0.040067	0.120692	0.0533755	0.957869
	ZDHHC21	9	14611069	14693469	709	0.618428	0.0226152	0.0545444	0.957869
	AC096574.5	2	238521620	238535168	514	0.724044	0.0218793	0.0597316	0.960396
	BMP2K	4	79697496	79831991	412	0.345962	0.0227327	0.0596153	0.960396
	CEP44	4	175206585	175254531	447	0.650366	0.0159113	0.0605947	0.960396
	CEP85	1	26560691	26605299	429	0.12381	0.0814687	0.0593953	0.960396
	CTB-109A12.1	5	156789623	156887026	522	0.0254833	0.334121	0.0604018	0.960396
	CWF19L2	11	107197071	107328572	470	0.0155448	0.713951	0.0601762	0.960396
	DNAAF3	19	55670031	55678090	459	0.0234588	0.669506	0.0595304	0.960396
	GUSBP3	5	68790040	69006341	99	0.0482002	0.213535	0.0601894	0.960396
	LINC00487	2	6868309	6910442	621	0.349968	0.0286348	0.0596087	0.960396
	LINC00665	19	36803969	36822620	306	0.215869	0.0460875	0.0600296	0.960396
	LINC00926	15	57592563	57599959	553	0.0355954	0.394857	0.0606504	0.960396
	MIPEP	13	24304328	24463558	761	0.254086	0.0874345	0.0562664	0.960396
	PLD6	17	17104309	17109629	379	0.0211397	0.329126	0.0583477	0.960396
	RP11-122C5.1	5	38710469	38720375	471	0.764666	0.0212847	0.057289	0.960396
	RP11-386M24.4	15	93258989	93277425	645	0.107965	0.0599796	0.0569028	0.960396
	RP11-408A13.4	9	14588795	14590063	708	0.883787	0.0198337	0.0597258	0.960396
	RP11-43A14.1	8	675188	675877	593	0.0204054	0.424432	0.0601597	0.960396
	RP11-475N22.4	3	128208055	128221191	366	0.128956	0.0709324	0.0574687	0.960396
	RP11-848G14.5	5	68927790	68932312	125	0.0196656	0.415038	0.0562773	0.960396
	RP11-96H19.1	12	46777462	46850051	347	0.225913	0.0370281	0.0596599	0.960396
	RP11-989F5.3	12	131295433	131297167	648	0.0227949	0.440375	0.0605093	0.960396
	SF3A3	1	38422647	38456593	470	0.0462023	0.20544	0.0559847	0.960396
	STX4	16	31044210	31054296	240	0.245647	0.0384659	0.0586437	0.960396
	TMED9	5	177019159	177023125	241	0.787017	0.0144775	0.0581622	0.960396
	XPNPEP3	22	41253088	41351450	287	0.0197461	0.436746	0.0566805	0.960396
	ZNF736	7	63767837	63815238	305	0.484099	0.0396231	0.0602363	0.960396
	TMC5	16	19421818	19510435	460	0.113493	0.154022	0.0609508	0.962039
	RP11-305K5.1	3	156241529	156242036	398	0.956546	0.0194523	0.0613602	0.965387
	MS4A7	11	60145955	60163424	457	0.253127	0.0263813	0.0617337	0.96815
	CCDC154	16	1484384	1494557	480	0.226484	0.0305387	0.06242	0.96959
	ERCC3	2	128014866	128051752	457	0.0339106	0.268982	0.0622903	0.96959
	RP11-382M14.1	11	107047012	107048256	459	0.0672079	0.178024	0.0623644	0.96959
	EEFSEC	3	127965679	128127485	377	0.624357	0.0171492	0.0629236	0.971247
	RP11-550I24.2	3	156893058	157098944	420	0.939321	0.0191805	0.0627563	0.971247
	AADAC	3	151531825	151546276	440	0.235906	0.364359	0.283963	0.974829
	AADAT	4	170981373	171012850	354	0.507441	0.151854	0.295118	0.974829
	AASDH	4	57204456	57253666	446	0.254398	0.073849	0.141049	0.974829
	ABO	9	136130951	136150617	595	0.0921758	0.116037	0.0712874	0.974829
	AC000078.5	22	19874812	19875493	551	0.419028	0.0542245	0.126955	0.974829
	AC002055.4	22	51195376	51239737	198	0.729397	0.121496	0.3159	0.974829
	AC004012.1	7	95101147	95103310	473	0.208342	0.0876668	0.0882773	0.974829
	AC004166.6	7	74320406	74331163	90	0.502977	0.136418	0.293529	0.974829
	AC004603.4	19	43326015	43331030	135	0.315947	0.0741841	0.155026	0.974829
	AC004951.5	7	44024593	44029806	361	0.119796	0.992869	0.362085	0.974829
	AC004980.7	7	76178677	76257299	178	0.778129	0.108768	0.23718	0.974829
	AC004985.12	7	44001189	44012924	364	0.115559	0.994414	0.352508	0.974829
	AC005154.7	7	30562759	30564151	462	0.297314	0.302782	0.349932	0.974829
	AC006262.5	19	46692423	46706340	415	0.052395	0.247771	0.0921968	0.974829
	AC006262.6	19	46706683	46718094	415	0.192766	0.154504	0.147545	0.974829
	AC006272.1	19	52343177	52346577	612	0.811597	0.0625715	0.203582	0.974829
	AC007009.1	7	8301912	8302451	726	0.053116	0.430689	0.114162	0.974829
	AC007193.6	19	46604380	46699475	410	0.339334	0.0781338	0.0964149	0.974829
	AC007461.2	17	70068474	70089622	515	0.058337	0.509688	0.147297	0.974829
	AC008746.12	19	54949847	54950362	457	0.0583608	0.235088	0.0871507	0.974829
	AC009299.3	2	162101250	162105561	384	0.0263538	0.585248	0.0848059	0.974829
	AC009336.24	2	177043153	177043736	463	0.685872	0.0827428	0.226483	0.974829
	AC009506.1	2	160471807	160473593	485	0.0485216	0.527281	0.12798	0.974829
	AC010492.2	19	54732911	54734088	492	0.992493	0.096629	0.232578	0.974829
	AC010883.5	2	43456712	43460533	496	0.0810679	0.694829	0.235324	0.974829
	AC016773.1	4	1741078	1743830	270	0.128876	0.13221	0.139474	0.974829
	AC016995.3	2	38633861	38742882	451	0.478554	0.205015	0.296925	0.974829
	AC017076.5	2	6968645	6980595	612	0.630477	0.0456814	0.0962425	0.974829
	AC018865.8	2	130748029	130808704	239	0.278282	0.323335	0.347088	0.974829
	AC018865.9	2	130794531	130795995	244	0.153864	0.342992	0.278594	0.974829
	AC020910.2	19	35166998	35168486	414	0.161047	0.227053	0.237509	0.974829
	AC021860.1	4	38628029	38629659	606	0.0746654	0.463368	0.151727	0.974829
	AC024560.3	3	197305084	197354777	369	0.0501059	0.62016	0.13443	0.974829
	AC024937.4	3	195723609	195725104	294	0.355385	0.177868	0.298124	0.974829
	AC024937.6	3	195664114	195665610	283	0.409759	0.289315	0.362272	0.974829
	AC025165.8	12	58005901	58011848	337	0.158891	0.203635	0.167672	0.974829
	AC026740.1	5	667759	668839	351	0.133329	0.688296	0.300085	0.974829
	AC072062.1	2	215674953	215827998	435	0.549174	0.123796	0.260392	0.974829
	AC073150.6	7	27531301	27532384	454	0.33601	0.095768	0.199641	0.974829
	AC074212.6	19	46271054	46275762	390	0.130433	0.314854	0.21242	0.974829
	AC079776.2	2	130680435	130691890	289	0.0889476	0.339734	0.173761	0.974829
	AC084018.1	12	122233173	122241812	337	0.442028	0.138289	0.197949	0.974829
	AC091801.1	7	3179868	3214287	595	0.161816	0.584516	0.359762	0.974829
	AC092295.7	19	37063972	37085610	306	0.835209	0.113199	0.26679	0.974829
	AC093162.5	2	85542164	85543652	447	0.118496	0.096882	0.0823705	0.974829
	AC093375.1	2	156868129	156881125	353	0.163135	0.376499	0.246286	0.974829
	AC093627.8	7	77038	80418	92	0.0790257	0.895994	0.255538	0.974829
	AC093668.2	7	102120179	102121095	242	0.307387	0.311185	0.364301	0.974829
	AC103965.1	15	84867600	84898888	246	0.53607	0.0544327	0.0946345	0.974829
	AC108004.2	17	33615	41378	199	0.676209	0.244546	0.344797	0.974829
	AC108488.3	2	3606207	3609324	562	0.1819	0.101037	0.141163	0.974829
	AC110619.2	2	241388835	241396131	529	0.825732	0.169685	0.361536	0.974829
	AC112715.2	2	238165734	238166319	554	0.164614	0.473063	0.273067	0.974829
	AC125232.1	2	87257800	87303536	108	0.475058	0.204131	0.348608	0.974829
	AC132008.1	3	197307215	197307500	379	0.294251	0.448077	0.313352	0.974829
	AC145343.2	17	66092187	66097615	320	0.0773574	0.867638	0.14273	0.974829
	AC159540.1	2	98081083	98099107	134	0.192392	0.370761	0.298589	0.974829
	ACACA	17	35441923	35766909	358	0.494434	0.169434	0.354649	0.974829
	ACOT1	14	74003818	74010498	356	0.153784	0.661034	0.331688	0.974829
	ACOT2	14	74034324	74042357	362	0.103368	0.464562	0.221544	0.974829
	ACP6	1	147101453	147142618	414	0.0432861	0.534203	0.117717	0.974829
	ACSM3	16	20621565	20807446	397	0.665518	0.134417	0.33277	0.974829
	ACTN3	11	66313866	66330800	261	0.230633	0.251108	0.279574	0.974829
	ACTR5	20	37377085	37400834	442	0.692293	0.0339722	0.109214	0.974829
	ACTR8	3	53901093	53916212	507	0.068077	0.677518	0.197705	0.974829
	ADAD2	16	84224744	84230772	969	0.370706	0.200785	0.335896	0.974829
	ADAM10	15	58887403	59042177	510	0.352233	0.0560028	0.106575	0.974829
	ADAM11	17	42836399	42859214	386	0.543387	0.17623	0.365521	0.974829
	ADAM32	8	38964509	39142430	288	0.199037	0.0484656	0.0878158	0.974829
	ADAMTS13	9	136279478	136324508	605	0.626362	0.0434526	0.141293	0.974829
	ADAT1	16	75630879	75657198	392	0.166752	0.702777	0.357907	0.974829
	ADCY4	14	24787555	24804277	523	0.317036	0.0743393	0.100116	0.974829
	ADD2	2	70834750	70995357	557	0.0525764	0.530818	0.13036	0.974829
	ADH1C	4	100257649	100274184	510	0.0756083	0.620876	0.193333	0.974829
	ADH4	4	100044808	100078949	497	0.0878368	0.754835	0.261446	0.974829
	ADH6	4	100123795	100140694	492	0.164952	0.465658	0.165959	0.974829
	ADRA1A	8	26605667	26724790	655	0.0953942	0.600845	0.263386	0.974829
	AF127936.5	21	16134031	16135411	604	0.836963	0.0790533	0.185592	0.974829
	AF131215.2	8	10965298	10967236	633	0.136531	0.258443	0.140755	0.974829
	AF131215.9	8	10962201	10964214	634	0.202774	0.264735	0.215193	0.974829
	AF131217.1	21	29811667	30047170	497	0.161303	0.650971	0.376277	0.974829
	AGA	4	178351924	178363657	444	0.937948	0.0870199	0.278297	0.974829
	AGAP6	10	51748078	51770259	217	0.592518	0.170031	0.215618	0.974829
	AGAP9	10	48189612	48237508	195	0.0458567	0.812094	0.159304	0.974829
	AIM2	1	159032274	159116886	472	0.414429	0.337763	0.27845	0.974829
	AJ006998.2	21	16742841	16774624	423	0.363981	0.156	0.25202	0.974829
	AK4	1	65613232	65697828	446	0.154062	0.473404	0.274659	0.974829
	AKR1C3	10	5077546	5149878	649	0.157287	0.407496	0.274978	0.974829
	AKR1E2	10	4828821	4890254	668	0.485086	0.0542741	0.0896821	0.974829
	AKR7A2	1	19630459	19638640	488	0.27987	0.115445	0.151456	0.974829
	AKR7A3	1	19609052	19615744	495	0.138204	0.327803	0.247608	0.974829
	AL132989.1	14	58754751	58755865	454	0.107474	0.649983	0.268831	0.974829
	AL161915.1	1	54569968	54571750	477	0.150792	0.480622	0.25214	0.974829
	ALDH16A1	19	49956426	49974305	371	0.0792959	0.804013	0.246517	0.974829
	ALDH1L1	3	125822412	125916837	466	0.0215171	0.97793	0.0883665	0.974829
	ALG10B	12	38710380	38717784	228	0.101963	0.260924	0.181558	0.974829
	ALKBH5	17	18086392	18113268	306	0.915677	0.108581	0.293478	0.974829
	ALMS1P	2	73872046	73912703	356	0.391165	0.0950916	0.168316	0.974829
	ALOX5	10	45869661	45941561	348	0.502059	0.188403	0.330218	0.974829
	ALPK1	4	113206665	113363762	395	0.0823041	0.546138	0.216256	0.974829
	ALS2CR12	2	202152994	202222121	351	0.12893	0.426026	0.264585	0.974829
	AMICA1	11	118064455	118095809	550	0.825828	0.114742	0.332624	0.974829
	AMIGO1	1	110046797	110052360	424	0.306719	0.428234	0.353151	0.974829
	AMT	3	49454211	49460186	288	0.169271	0.231289	0.200987	0.974829
	ANKLE1	19	17392454	17398455	417	0.127707	0.326251	0.195415	0.974829
	ANKMY1	2	241418839	241508626	496	0.304538	0.064222	0.09129	0.974829
	ANKRD34A	1	145470508	145475646	108	0.186906	0.35632	0.158536	0.974829
	ANKRD54	22	38226862	38244874	405	0.321674	0.193514	0.211386	0.974829
	ANO10	3	43396351	43733086	364	0.108374	0.581091	0.253475	0.974829
	ANO5	11	22214722	22304903	376	0.497177	0.0463929	0.125673	0.974829
	ANTXR2	4	80822303	81046608	377	0.505151	0.106097	0.129074	0.974829
	ANTXRL	10	47657581	47701443	56	0.126769	0.457571	0.230325	0.974829
	ANXA8L1	10	47157983	47174093	41	0.65139	0.167485	0.31228	0.974829
	ANXA8L2	10	47746936	47763041	56	0.410322	0.176779	0.20582	0.974829
	AOAH	7	36552456	36764154	580	0.3958	0.204695	0.342853	0.974829
	AP000350.6	22	24269087	24271761	407	0.348068	0.521506	0.382255	0.974829
	AP000473.8	21	18015848	18017384	386	0.240047	0.68126	0.380477	0.974829
	AP001007.1	11	124959132	124960411	485	0.0400306	0.302205	0.0953479	0.974829
	AP001625.6	21	43980484	43982044	728	0.0745369	0.589663	0.135072	0.974829
	AP001627.1	21	44153704	44161868	650	0.191496	0.264872	0.28767	0.974829
	AP001628.7	21	44201184	44202343	621	0.270598	0.153444	0.247191	0.974829
	AP001816.1	4	102268937	102270040	359	0.449895	0.0500711	0.0949979	0.974829
	AP001877.1	11	95556681	95557336	626	0.290714	0.252628	0.197944	0.974829
	AP006621.1	11	780117	780755	421	0.199827	0.466144	0.369467	0.974829
	AP006621.5	11	777578	784297	421	0.179847	0.48259	0.338398	0.974829
	AP006621.6	11	781645	782105	422	0.24183	0.390882	0.38208	0.974829
	AP006621.9	11	708564	709023	464	0.0630474	0.646223	0.147515	0.974829
	AP1M1	19	16308389	16346160	458	0.144477	0.701883	0.265254	0.974829
	AP3S2	15	90373831	90437574	420	0.412572	0.207087	0.278478	0.974829
	AP4B1	1	114437370	114447762	468	0.848102	0.0339874	0.127404	0.974829
	AP4E1	15	51200869	51298097	477	0.599208	0.0846741	0.217199	0.974829
	AP4M1	7	99699564	99707968	274	0.742502	0.125019	0.24383	0.974829
	APAF1	12	99038919	99128461	443	0.164383	0.50767	0.36102	0.974829
	APEH	3	49711435	49721379	319	0.19413	0.124572	0.143429	0.974829
	APOA1BP	1	156561554	156564091	440	0.182438	0.496485	0.353961	0.974829
	ARFIP1	4	153701089	153839615	388	0.617868	0.10698	0.242311	0.974829
	ARHGEF25	12	58003963	58013162	338	0.0627243	0.715254	0.202003	0.974829
	ARHGEF26	3	153838792	153975616	393	0.552917	0.158943	0.368181	0.974829
	ARL16	17	79648204	79650954	327	0.600913	0.140993	0.321767	0.974829
	ARL17B	17	44352150	44439130	60	0.0535115	0.91611	0.158907	0.974829
	ARL6IP1	16	18802991	18813000	225	0.327678	0.154851	0.201479	0.974829
	ARL6IP4	12	123466197	123467456	321	0.119796	0.54599	0.24404	0.974829
	ARL6IP5	3	69134095	69155217	457	0.564996	0.0386175	0.07973	0.974829
	ARMC10	7	102715328	102740205	240	0.261595	0.226354	0.274329	0.974829
	ARPC2	2	219081817	219119079	454	0.72049	0.143459	0.255426	0.974829
	ASAH2	10	51942538	52008370	323	0.840848	0.158644	0.287429	0.974829
	ASAH2B	10	52499078	52576255	465	0.342753	0.214385	0.262721	0.974829
	ASB4	7	95107756	95169544	476	0.434137	0.097783	0.103491	0.974829
	ASCL5	1	201083081	201096312	657	0.568497	0.167393	0.268009	0.974829
	ASH1L	1	155305059	155491409	234	0.589331	0.0615013	0.178992	0.974829
	ASNSD1	2	190526111	190535557	292	0.698301	0.15639	0.383147	0.974829
	ATAD1	10	89511269	89601100	410	0.165938	0.204895	0.203172	0.974829
	ATF4	22	39915700	39918691	396	0.113649	0.608952	0.22153	0.974829
	ATF7IP2	16	10420291	10577495	611	0.537005	0.0307558	0.0863158	0.974829
	ATHL1	11	289138	296107	317	0.227943	0.440673	0.341423	0.974829
	ATP11B	3	182511288	182639027	360	0.32849	0.158032	0.242974	0.974829
	ATP6V0E2	7	149570057	149577784	260	0.455466	0.161584	0.307171	0.974829
	ATP6V0E2-AS1	7	149564786	149568885	259	0.209584	0.14607	0.193539	0.974829
	ATP6V1E2	2	46717889	46769696	672	0.032532	0.450592	0.0840522	0.974829
	ATP8B3	19	1782074	1812275	378	0.160385	0.446873	0.239217	0.974829
	AVPR1A	12	63539014	63544722	522	0.58933	0.161431	0.341323	0.974829
	AZGP1P1	7	99578385	99585158	271	0.363823	0.27681	0.323462	0.974829
	B3GALNT2	1	235613238	235667781	324	0.119479	0.409617	0.231171	0.974829
	B3GAT2	6	71566382	71666741	417	0.346427	0.245881	0.359232	0.974829
	B3GNTL1	17	80901667	81009686	254	0.0509228	0.727993	0.171845	0.974829
	BARD1	2	215590370	215674428	435	0.889078	0.138732	0.338443	0.974829
	BBS2	16	56500748	56554195	489	0.432704	0.0280354	0.0697141	0.974829
	BBS7	4	122745595	122791652	383	0.595457	0.089564	0.205423	0.974829
	BCO2	11	112046190	112095422	388	0.836568	0.0982486	0.236831	0.974829
	BCS1L	2	219523600	219528166	371	0.142863	0.607108	0.223604	0.974829
	BHMT	5	78407602	78428108	415	0.0817353	0.787242	0.248374	0.974829
	BICD1	12	32259769	32536567	563	0.131542	0.378	0.192339	0.974829
	BIN3	8	22479028	22526661	515	0.0969716	0.947558	0.299148	0.974829
	BIRC7	20	61867235	61871859	493	0.122081	0.181428	0.145312	0.974829
	BMS1P3	10	88752010	88760192	244	0.189454	0.645413	0.377624	0.974829
	BMS1P7	10	49256241	49268060	200	0.495465	0.25393	0.320028	0.974829
	BNIP1	5	172571581	172591390	569	0.847286	0.0297653	0.0705762	0.974829
	BOLA3-AS1	2	74375136	74377188	357	0.245822	0.31723	0.34183	0.974829
	BPI	20	36888551	36965907	498	0.388438	0.0756273	0.159841	0.974829
	BRINP1	9	121915736	122131745	539	0.449411	0.116163	0.186349	0.974829
	BTBD19	1	45274154	45279801	343	0.467082	0.189396	0.346451	0.974829
	BTN2A3P	6	26421619	26432611	514	0.227577	0.614948	0.3751	0.974829
	BTNL3	5	180415845	180433727	300	0.936155	0.085553	0.260636	0.974829
	BTNL8	5	180326077	180377906	331	0.912219	0.0880929	0.262675	0.974829
	BZRAP1-AS1	17	56402811	56472371	350	0.136055	0.641328	0.336746	0.974829
	C10orf11	10	77360998	78319925	398	0.486417	0.221849	0.223989	0.974829
	C10orf112	10	19492779	20079330	568	0.26172	0.420433	0.379526	0.974829
	C10orf88	10	124690419	124713896	568	0.126488	0.307063	0.141141	0.974829
	C11orf21	11	2316875	2324279	479	0.0492925	0.135922	0.0711858	0.974829
	C11orf48	11	62430287	62438755	368	0.151272	0.324944	0.21319	0.974829
	C11orf54	11	93475129	93497915	410	0.0739652	0.916747	0.218217	0.974829
	C11orf83	11	62439242	62441159	368	0.0907319	0.296969	0.101753	0.974829
	C12orf43	12	121440316	121454305	461	0.977584	0.0617255	0.182015	0.974829
	C12orf65	12	123717463	123742506	347	0.185724	0.926869	0.344821	0.974829
	C12orf73	12	104343980	104359486	636	0.0614255	0.949188	0.143191	0.974829
	C14orf144	14	104710541	104712473	358	0.697251	0.203885	0.372825	0.974829
	C16orf93	16	30772519	30774031	208	0.070302	0.291191	0.125767	0.974829
	C17orf107	17	4802713	4806227	443	0.644661	0.186718	0.372303	0.974829
	C17orf62	17	80400522	80408705	404	0.43891	0.159272	0.27573	0.974829
	C17orf72	17	62078444	62081664	314	0.204817	0.223835	0.137798	0.974829
	C17orf97	17	260118	273510	299	0.410942	0.141467	0.17146	0.974829
	C18orf8	18	21083473	21110576	346	0.807288	0.11488	0.326125	0.974829
	C19orf24	19	1275026	1279248	412	0.994339	0.0805489	0.214553	0.974829
	C19orf33	19	38794801	38795649	369	0.0816735	0.700373	0.155347	0.974829
	C19orf44	19	16607122	16632163	396	0.15651	0.168825	0.18971	0.974829
	C1GALT1	7	7196565	7288282	470	0.116157	0.646534	0.242844	0.974829
	C1orf101	1	244617679	244804479	461	0.0771897	0.336873	0.14487	0.974829
	C1orf216	1	36179476	36185073	247	0.0269799	0.882949	0.0969953	0.974829
	C1orf85	1	156259880	156265463	394	0.269336	0.254874	0.303993	0.974829
	C1QTNF4	11	47611216	47616211	285	0.458927	0.268221	0.310452	0.974829
	C21orf119	21	33765439	33766254	487	0.622531	0.0726075	0.178637	0.974829
	C21orf2	21	45749115	45759258	485	0.216983	0.343099	0.345728	0.974829
	C21orf49	21	34144411	34266043	487	0.682625	0.159546	0.35204	0.974829
	C2orf40	2	106679702	106694615	485	0.680456	0.105306	0.157097	0.974829
	C2orf43	2	20883788	21022882	512	0.238118	0.602734	0.375112	0.974829
	C2orf82	2	233733724	233743395	461	0.310924	0.0801253	0.105924	0.974829
	C3orf38	3	88199036	88217879	303	0.401026	0.132435	0.24683	0.974829
	C4BPA	1	207277607	207318317	393	0.567866	0.170901	0.317775	0.974829
	C4orf32	4	113066553	113116412	393	0.268284	0.291571	0.319315	0.974829
	C4orf33	4	130014765	130037795	373	0.199048	0.044385	0.0747534	0.974829
	C5	9	123714616	123812554	376	0.461668	0.0557062	0.132247	0.974829
	C5orf17	5	23951457	24178372	338	0.430622	0.300813	0.313219	0.974829
	C5orf45	5	179261436	179285887	440	0.138781	0.301631	0.248166	0.974829
	C5orf54	5	159820155	159827104	468	0.102112	0.65312	0.273836	0.974829
	C6orf201	6	4079456	4131185	637	0.0794207	0.952293	0.242475	0.974829
	C6orf3	6	111921078	111923498	437	0.803118	0.157717	0.29488	0.974829
	C6orf57	6	71276620	71299272	507	0.141214	0.243225	0.0898387	0.974829
	C7orf13	7	156431057	156433348	465	0.0375019	0.853761	0.130273	0.974829
	C7orf31	7	25174316	25219975	673	0.938632	0.0917379	0.265547	0.974829
	C9orf114	9	131581930	131592100	319	0.065124	0.909973	0.21761	0.974829
	C9orf173	9	140145713	140147934	363	0.205886	0.512397	0.303268	0.974829
	C9orf37	9	140509813	140513358	345	0.314034	0.344899	0.350336	0.974829
	C9orf9	9	135753414	135765588	562	0.656428	0.026452	0.0699259	0.974829
	CABLES2	20	60963688	60982341	487	0.200535	0.301927	0.273286	0.974829
	CACUL1	10	120433679	120514761	506	0.913785	0.0702095	0.218043	0.974829
	CAMKK2	12	121675497	121736111	400	0.51831	0.0577874	0.149261	0.974829
	CAMLG	5	134074191	134087847	307	0.0856823	0.470323	0.156786	0.974829
	CAMSAP1	9	138700333	138799074	428	0.98146	0.115124	0.303322	0.974829
	CANT1	17	76987799	77005949	627	0.143949	0.74198	0.380589	0.974829
	CANX	5	179125407	179157926	463	0.0330994	0.580592	0.101224	0.974829
	CAPG	2	85621871	85645555	459	0.0909905	0.238867	0.127621	0.974829
	CAPN10	2	241526133	241557122	491	0.146803	0.181022	0.14738	0.974829
	CAPS	19	5911780	5915888	385	0.11684	0.746615	0.327881	0.974829
	CAPZB	1	19665267	19812066	532	0.0439825	0.386368	0.10835	0.974829
	CARD14	17	78143791	78183062	472	0.135594	0.168138	0.164874	0.974829
	CARD8	19	48684027	48759203	520	0.368136	0.211041	0.239579	0.974829
	CARS2	13	111293764	111365624	679	0.611893	0.140844	0.318197	0.974829
	CASC3	17	38296576	38328436	308	0.404714	0.261784	0.355314	0.974829
	CASD1	7	94138531	94186331	319	0.135594	0.340238	0.191143	0.974829
	CASP7	10	115438942	115490662	600	0.129879	0.909508	0.371786	0.974829
	CASQ1	1	160160285	160171676	515	0.840478	0.141467	0.324478	0.974829
	CBLN3	14	24895738	24900160	559	0.943742	0.114471	0.281264	0.974829
	CBWD1	9	121041	188979	471	0.116475	0.593439	0.224109	0.974829
	CBX8	17	77765931	77775482	482	0.464597	0.117574	0.255635	0.974829
	CCDC113	16	58265061	58317740	494	0.182484	0.300369	0.142594	0.974829
	CCDC114	19	48799714	48824068	510	0.510552	0.186483	0.288305	0.974829
	CCDC124	19	18043825	18054800	428	0.84661	0.118841	0.255956	0.974829
	CCDC125	5	68576002	68628636	235	0.0224477	0.862401	0.0779609	0.974829
	CCDC13	3	42749761	42814696	451	0.0607261	0.295284	0.112632	0.974829
	CCDC134	22	42196683	42222303	320	0.0437012	0.161691	0.0766243	0.974829
	CCDC137	17	79633664	79640934	325	0.527435	0.134191	0.263659	0.974829
	CCDC144NL	17	20739760	20799453	200	0.31228	0.0429703	0.0901484	0.974829
	CCDC171	9	15552895	16061661	455	0.672827	0.126719	0.262256	0.974829
	CCDC174	3	14693271	14714166	635	0.205197	0.280112	0.149801	0.974829
	CCDC36	3	49235861	49295537	260	0.340018	0.301547	0.339389	0.974829
	CCDC40	17	78010435	78074412	405	0.833603	0.0307332	0.0993795	0.974829
	CCDC53	12	102406705	102455927	453	0.368688	0.0774492	0.145948	0.974829
	CCDC62	12	123258874	123312075	308	0.536726	0.154361	0.243283	0.974829
	CCDC82	11	96085933	96123087	474	0.0333559	0.362554	0.0831037	0.974829
	CCL14	17	34310327	34313569	284	0.400231	0.275558	0.343521	0.974829
	CCL15	17	34323476	34329084	282	0.491753	0.182335	0.19801	0.974829
	CCL16	17	34303529	34308532	286	0.699789	0.104843	0.181557	0.974829
	CCL23	17	34340096	34345005	283	0.0894225	0.289088	0.133875	0.974829
	CCL4	17	34430983	34433014	277	0.69376	0.0483476	0.155915	0.974829
	CCNJ	10	97803151	97820627	501	0.0966195	0.864796	0.296935	0.974829
	CCNT2	2	135675805	135716912	372	0.135245	0.862937	0.360076	0.974829
	CCT3	1	156278759	156337664	411	0.0576127	0.429382	0.0982142	0.974829
	CCZ1	7	5938365	5964445	342	0.16907	0.123503	0.113309	0.974829
	CD1B	1	158297741	158301321	517	0.111717	0.0978884	0.0890592	0.974829
	CD3EAP	19	45909467	45914024	371	0.52471	0.0319756	0.0791432	0.974829
	CD79B	17	62006100	62009714	332	0.0630375	0.485894	0.133699	0.974829
	CD83	6	14117872	14137149	491	0.167432	0.0795237	0.0838997	0.974829
	CDC25B	20	3767578	3786762	515	0.0694676	0.411146	0.134532	0.974829
	CDC42	1	22379120	22419437	514	0.933584	0.0274703	0.106724	0.974829
	CDCA2	8	25316513	25365436	495	0.11597	0.346685	0.184266	0.974829
	CDH6	5	31193857	31329253	621	0.0478287	0.648519	0.139638	0.974829
	CDK2AP1	12	123746031	123756881	348	0.0449052	0.953618	0.119297	0.974829
	CDK5RAP3	17	46045176	46059138	388	0.250498	0.240756	0.304731	0.974829
	CECR1	22	17660194	17702879	533	0.474489	0.114746	0.220308	0.974829
	CECR7	22	17517460	17541715	474	0.0800119	0.511616	0.198773	0.974829
	CENPJ	13	25457171	25497018	540	0.219953	0.798111	0.353377	0.974829
	CENPQ	6	49431091	49460820	347	0.208475	0.282284	0.297966	0.974829
	CENPW	6	126661320	126670021	185	0.110127	0.158782	0.0707188	0.974829
	CEP57	11	95523129	95565857	617	0.280225	0.298256	0.308801	0.974829
	CEP72	5	612387	667283	366	0.114013	0.684926	0.28269	0.974829
	CFL1P5	5	68609198	68609464	243	0.0203349	0.918286	0.0722295	0.974829
	CGGBP1	3	88101094	88198892	303	0.333795	0.314135	0.326814	0.974829
	CHEK1	11	125495111	125546150	531	0.138686	0.187035	0.148305	0.974829
	CHKB	22	51017378	51039884	285	0.516108	0.0718183	0.178423	0.974829
	CHKB-AS1	22	51021455	51022306	294	0.258222	0.180638	0.2445	0.974829
	CHMP6	17	78965398	78983317	444	0.499365	0.209255	0.377021	0.974829
	CHRNE	17	4801357	4806369	443	0.252921	0.211052	0.269919	0.974829
	CHST2	3	142838173	142841800	550	0.354442	0.145668	0.162163	0.974829
	CHST8	19	34112861	34264414	475	0.0930565	0.731157	0.188469	0.974829
	CKMT2-AS1	5	80499903	80597379	464	0.155037	0.207921	0.217306	0.974829
	CLCN7	16	1494935	1525581	489	0.932207	0.0299	0.101311	0.974829
	CLEC18A	16	69984810	69998141	209	0.172534	0.500145	0.343804	0.974829
	CLEC4M	19	7828035	7834491	418	0.150941	0.887928	0.37277	0.974829
	CLIC6	21	36041688	36090525	572	0.5286	0.115881	0.263694	0.974829
	CLK4	5	178029665	178054115	574	0.101743	0.780816	0.268518	0.974829
	CLPSL1	6	35748794	35761452	415	0.935167	0.104821	0.255751	0.974829
	CLUHP3	16	31711911	31721097	209	0.720362	0.109698	0.294604	0.974829
	CMAHP	6	25081548	25166793	618	0.786644	0.0707027	0.190749	0.974829
	CNGA1	4	47937994	48018689	407	0.0465234	0.992559	0.155371	0.974829
	CNIH1	14	54893654	54908149	440	0.246226	0.15138	0.171608	0.974829
	CNOT8	5	154237113	154256353	446	0.57538	0.0789749	0.183616	0.974829
	CNPY4	7	99717236	99723134	279	0.0964222	0.416903	0.183578	0.974829
	CNTLN	9	17134980	17503921	546	0.988395	0.100111	0.244251	0.974829
	COA1	7	43648055	43769316	411	0.242805	0.740215	0.361269	0.974829
	COG4	16	70514471	70557468	159	0.114874	0.43671	0.243197	0.974829
	COL26A1	7	101006101	101202304	347	0.237881	0.327815	0.365329	0.974829
	COLQ	3	15491640	15563258	383	0.196535	0.731929	0.36265	0.974829
	COMMD7	20	31290493	31331803	418	0.119526	0.999394	0.359962	0.974829
	COPRS	17	30178883	30186356	323	0.178344	0.416053	0.186386	0.974829
	COQ9	16	57481441	57495187	582	0.0239579	0.739848	0.0853189	0.974829
	COX16	14	70791798	70826448	568	0.072232	0.428435	0.186986	0.974829
	COX6B1P4	8	26693334	26693817	659	0.031008	0.812745	0.0878889	0.974829
	COX6C	8	100885428	100906290	353	0.177523	0.600665	0.308162	0.974829
	CPS1	2	211342406	211543831	346	0.240937	0.521859	0.337378	0.974829
	CPSF2	14	92588281	92630755	526	0.129284	0.858921	0.366297	0.974829
	CPSF3	2	9563697	9613230	433	0.864922	0.132224	0.307572	0.974829
	CPT1B	22	51007290	51017096	296	0.234734	0.182065	0.220579	0.974829
	CREBRF	5	172483355	172566291	558	0.073593	0.134894	0.0746287	0.974829
	CRELD1	3	9975506	9987097	491	0.108653	0.894971	0.329743	0.974829
	CRIPT	2	46844290	46852881	666	0.729823	0.0790047	0.182721	0.974829
	CROCC	1	17066768	17299474	279	0.496053	0.196318	0.342919	0.974829
	CROCCP2	1	16944751	16961054	263	0.202366	0.304716	0.243503	0.974829
	CRYL1	13	20977806	21099996	501	0.0658408	0.585978	0.133603	0.974829
	CSDC2	22	41956767	41973745	306	0.495878	0.158613	0.343444	0.974829
	CSF1	1	110452864	110473614	474	0.306976	0.309759	0.316879	0.974829
	CSPG4P11	15	84855504	84866136	253	0.861283	0.125372	0.241956	0.974829
	CTA-246H3.12	22	25830291	25831037	513	0.130256	0.413887	0.165947	0.974829
	CTA-29F11.1	22	47157791	47158460	571	0.562347	0.0595799	0.115009	0.974829
	CTA-363E6.6	16	19488238	19499221	460	0.103811	0.247062	0.125902	0.974829
	CTA-384D8.36	22	50962854	50963209	321	0.172146	0.232916	0.242078	0.974829
	CTAGE8	7	143963794	143966381	320	0.740299	0.125365	0.319707	0.974829
	CTB-107G13.1	7	103085654	103154454	422	0.219838	0.198949	0.143501	0.974829
	CTB-12O2.1	5	151329132	151650009	530	0.215984	0.232707	0.268449	0.974829
	CTB-161M19.4	5	118342042	118406585	377	0.302908	0.29158	0.374283	0.974829
	CTB-171A8.1	19	45135500	45222031	435	0.133636	0.554264	0.283959	0.974829
	CTB-36H16.2	5	122168051	122170228	446	0.0184522	0.704345	0.0661224	0.974829
	CTB-47B11.3	5	156802749	156811958	507	0.151524	0.0971638	0.101294	0.974829
	CTC-236F12.4	5	55753622	55777596	546	0.416471	0.0929701	0.20901	0.974829
	CTC-338M12.1	5	180632361	180633120	211	0.066587	0.25107	0.0677835	0.974829
	CTC-462L7.1	17	53246184	53250993	541	0.232908	0.551887	0.30979	0.974829
	CTC-484P3.1	5	94161666	94162399	409	0.910875	0.106213	0.246012	0.974829
	CTC-523E23.5	19	35328793	35346208	443	0.181993	0.144968	0.176366	0.974829
	CTC-550B14.7	19	55517561	55559413	472	0.277942	0.18981	0.19894	0.974829
	CTD-2054N24.2	15	100347228	100417353	540	0.141173	0.747596	0.352083	0.974829
	CTD-2162K18.4	19	37264055	37267980	274	0.207171	0.597677	0.383517	0.974829
	CTD-2196E14.9	16	23681332	23684448	436	0.169266	0.7816	0.313796	0.974829
	CTD-2210P24.4	11	45792983	45793909	400	0.092073	0.843729	0.281609	0.974829
	CTD-2228K2.7	5	473351	480780	325	0.155121	0.586831	0.310234	0.974829
	CTD-2258A20.5	16	66503769	66513034	490	0.219053	0.435828	0.302205	0.974829
	CTD-2287O16.5	5	115419504	115421113	593	0.119316	0.78089	0.261167	0.974829
	CTD-2303H24.2	17	18424439	18437376	290	0.134034	0.71536	0.341407	0.974829
	CTD-2324F15.2	5	6310554	6339997	636	0.0613862	0.628354	0.179618	0.974829
	CTD-2336O2.1	8	1710156	1712668	733	0.0483777	0.192362	0.0818701	0.974829
	CTD-2530H12.4	11	75294241	75305710	439	0.18369	0.774619	0.350316	0.974829
	CTD-2540L5.6	14	71075515	71108015	434	0.289041	0.304064	0.285627	0.974829
	CTD-2541M15.4	8	6503576	6505803	871	0.437964	0.174279	0.305269	0.974829
	CTD-2561J22.5	19	21627043	21646710	299	0.162005	0.47563	0.298412	0.974829
	CTD-2589H19.6	5	675941	676731	348	0.166435	0.645234	0.351806	0.974829
	CTD-2651B20.3	15	45543884	45571449	335	0.931889	0.0365391	0.131349	0.974829
	CTD-2651B20.4	15	45622407	45624832	325	0.961749	0.0821575	0.256269	0.974829
	CTD-3025N20.3	8	66504085	66504707	360	0.189005	0.414273	0.320527	0.974829
	CTD-3065B20.2	15	91139072	91139679	464	0.218364	0.256388	0.239984	0.974829
	CTD-3074O7.12	11	66303369	66305407	263	0.230775	0.418118	0.358076	0.974829
	CTD-3074O7.5	11	66240961	66245567	282	0.230462	0.357796	0.356263	0.974829
	CTD-3131K8.2	19	17599799	17622437	421	0.0686944	0.823553	0.206307	0.974829
	CTD-3199J23.6	17	41297131	41297272	288	0.0933466	0.923499	0.270267	0.974829
	CTGLF12P	10	49217898	49239729	168	0.858765	0.158738	0.335475	0.974829
	CTNNAL1	9	111704851	111775809	621	0.160382	0.456935	0.293185	0.974829
	CTSB	8	11700033	11726957	422	0.283833	0.275502	0.254392	0.974829
	CTSS	1	150702672	150738433	304	0.428134	0.146631	0.293339	0.974829
	CYB5R2	11	7686331	7698453	695	0.898066	0.0996896	0.295704	0.974829
	CYB5R3	22	43013846	43045574	439	0.106064	0.756892	0.259475	0.974829
	CYBRD1	2	172378757	172414643	357	0.196843	0.579674	0.268078	0.974829
	CYCSP34	13	41437735	41438038	358	0.234207	0.550905	0.335144	0.974829
	CYP2D7P1	22	42536214	42540576	362	0.583327	0.0682857	0.183352	0.974829
	CYP2D8P1	22	42545877	42551007	368	0.555451	0.090006	0.211018	0.974829
	CYP8B1	3	42897497	42917633	414	0.127467	0.587	0.314893	0.974829
	CYS1	2	10196907	10221071	595	0.623029	0.0546258	0.162817	0.974829
	CYTH2	19	48972951	48983103	530	0.402965	0.293587	0.361329	0.974829
	DAGLB	7	6448760	6487643	304	0.811263	0.0736863	0.229869	0.974829
	DALRD3	3	49053387	49059726	265	0.87651	0.0928806	0.278876	0.974829
	DANCR	4	53578597	53586247	289	0.0613894	0.73574	0.194074	0.974829
	DBF4B	17	42785976	42829632	390	0.314512	0.244494	0.354092	0.974829
	DBH-AS1	9	136519708	136522435	611	0.365539	0.124606	0.220731	0.974829
	DCAF16	4	17802278	17812381	380	0.260416	0.116276	0.0749818	0.974829
	DCAF4	14	73393040	73426411	466	0.306568	0.0514195	0.091682	0.974829
	DCAKD	17	43100708	43138473	326	0.181779	0.238029	0.187375	0.974829
	DCK	4	71858255	71896631	306	0.619648	0.149339	0.251449	0.974829
	DCLK2	4	150999426	151178609	392	0.665041	0.0390459	0.104787	0.974829
	DCLRE1B	1	114447824	114456708	468	0.0791504	0.180127	0.113043	0.974829
	DCTD	4	183811213	183839089	505	0.36812	0.0257168	0.0660365	0.974829
	DCTN4	5	150088002	150138671	497	0.415973	0.380498	0.347897	0.974829
	DDO	6	110712974	110736765	410	0.700526	0.0464709	0.142257	0.974829
	DDRGK1	20	3170996	3185331	437	0.545865	0.129099	0.283111	0.974829
	DDT	22	24315293	24322660	402	0.366951	0.214721	0.309582	0.974829
	DDX1	2	15731302	15771235	487	0.135365	0.274853	0.223482	0.974829
	DDX11-AS1	12	31173697	31226778	458	0.250409	0.339711	0.353204	0.974829
	DDX25	11	125773271	125793005	559	0.0447576	0.386025	0.0780005	0.974829
	DDX31	9	135468384	135545421	539	0.0677247	0.775356	0.199849	0.974829
	DDX42	17	61851136	61896677	316	0.836159	0.137508	0.382569	0.974829
	DDX59	1	200593024	200639097	540	0.105986	0.931327	0.293911	0.974829
	DEFB1	8	6728097	6735544	655	0.0770257	0.113624	0.0851871	0.974829
	DEFB124	20	30053309	30060841	225	0.758737	0.151179	0.309143	0.974829
	DENND4B	1	153901977	153919172	326	0.631436	0.14253	0.360122	0.974829
	DESI1	22	41994032	42017100	314	0.0803423	0.270662	0.134828	0.974829
	DHFR	5	79922047	79950802	481	0.155623	0.532811	0.353402	0.974829
	DHODH	16	72042487	72058954	370	0.218035	0.255708	0.310942	0.974829
	DHPS	19	12786647	12792716	299	0.15	0.864735	0.371797	0.974829
	DHRS1	14	24759804	24769039	496	0.508143	0.0770377	0.188992	0.974829
	DHX57	2	39024871	39103075	321	0.15128	0.0954415	0.0654834	0.974829
	DHX58	17	40253422	40264751	320	0.0611959	0.774503	0.166813	0.974829
	DIRC1	2	189598882	189654831	280	0.585509	0.0890235	0.21822	0.974829
	DIRC2	3	122513642	122599986	509	0.484952	0.0790442	0.155448	0.974829
	DIS3L	15	66585555	66626236	490	0.221177	0.638192	0.373132	0.974829
	DISC1	1	231762561	232177018	484	0.561637	0.0318174	0.0693162	0.974829
	DISP2	15	40650436	40663257	399	0.370796	0.243321	0.3782	0.974829
	DLG5	10	79553302	79686378	513	0.798889	0.0854886	0.26663	0.974829
	DMWD	19	46286205	46296060	400	0.0423074	0.844394	0.0919309	0.974829
	DNAH17	17	76419778	76573476	534	0.163278	0.245798	0.225589	0.974829
	DNAH6	2	84743579	85046713	344	0.274391	0.150671	0.179472	0.974829
	DNAJC15	13	43597339	43683045	602	0.236623	0.176408	0.255008	0.974829
	DNASE1L3	3	58177984	58200424	447	0.0692853	0.33279	0.118049	0.974829
	DNM1P51	15	84953014	84966399	313	0.923177	0.187221	0.339682	0.974829
	DNTTIP1	20	44420576	44440066	530	0.215827	0.0961609	0.14132	0.974829
	DOK3	5	176928908	176938275	259	0.386032	0.0987222	0.209302	0.974829
	DPH1	17	1933404	1945898	465	0.276779	0.0735051	0.110992	0.974829
	DPH7	9	140449356	140473387	348	0.25067	0.375575	0.285252	0.974829
	DPP3	11	66247484	66277130	280	0.244934	0.514127	0.355823	0.974829
	DPY19L1P2	7	32852369	32878182	392	0.261256	0.0797585	0.147731	0.974829
	DPY19L2	12	63952693	64062629	331	0.860176	0.105612	0.314223	0.974829
	DPYSL4	10	134000404	134019280	464	0.743009	0.0572763	0.174677	0.974829
	DRG2	17	17991200	18011285	334	0.346727	0.175643	0.185813	0.974829
	DTD1	20	18568537	18744561	484	0.667195	0.198669	0.362886	0.974829
	DUS1L	17	80015382	80023763	312	0.582639	0.0998302	0.262287	0.974829
	DUSP18	22	31048038	31063587	450	0.71512	0.153782	0.379882	0.974829
	DZIP1L	3	137780832	137834660	355	0.28015	0.379219	0.372578	0.974829
	EFHB	3	19920964	19988517	381	0.130786	0.341191	0.0891439	0.974829
	EFHD1	2	233470767	233547491	456	0.800816	0.0467365	0.155443	0.974829
	EID3	12	104697517	104698980	798	0.535098	0.165751	0.201879	0.974829
	EIF3B	7	2393721	2420380	415	0.0474693	0.842158	0.153578	0.974829
	EIF3KP1	5	102368080	102368735	310	0.56512	0.344126	0.37497	0.974829
	EIF4B	12	53399942	53435993	596	0.0537143	0.22293	0.0938451	0.974829
	ELOVL4	6	80624529	80657297	474	0.819423	0.087921	0.210908	0.974829
	EMC1	1	19542158	19578032	506	0.340016	0.220287	0.190209	0.974829
	EME2	16	1823208	1831709	475	0.0453894	0.504524	0.132968	0.974829
	EMR2	19	14844559	14889353	460	0.072755	0.71661	0.20188	0.974829
	ENDOU	12	48103517	48119350	542	0.823661	0.10253	0.306874	0.974829
	ENHO	9	34521038	34523039	358	0.665056	0.142696	0.267443	0.974829
	ENPP4	6	46097730	46114436	507	0.085927	0.269125	0.147656	0.974829
	ENPP7P2	3	75495920	75540353	137	0.264971	0.465506	0.344258	0.974829
	ENTPD3-AS1	3	40355293	40494820	345	0.0616635	0.572673	0.0912819	0.974829
	EP300	22	41487790	41576081	276	0.249044	0.120357	0.14552	0.974829
	EPB41L4A	5	111478138	111755013	413	0.0187707	0.799791	0.0713817	0.974829
	EPG5	18	43427574	43547240	513	0.137275	0.992083	0.371693	0.974829
	EPO	7	100318423	100321323	299	0.403541	0.164695	0.259517	0.974829
	ERAP2	5	96211643	96255420	507	0.0402689	0.963263	0.14696	0.974829
	ERCC2	19	45853095	45874176	370	0.266371	0.0478354	0.0909637	0.974829
	ERI2	16	20791515	20907703	338	0.403753	0.355226	0.382903	0.974829
	ERO1LB	1	236378855	236445319	585	0.251268	0.215235	0.257248	0.974829
	ERV3-1	7	64451415	64467121	255	0.769984	0.178961	0.372835	0.974829
	ETHE1	19	44010871	44031396	382	0.104959	0.846965	0.280376	0.974829
	EXOG	3	38537618	38583437	443	0.555389	0.0986914	0.179089	0.974829
	EXOSC1	10	99195899	99205774	508	0.498398	0.181628	0.195202	0.974829
	EXOSC10	1	11126675	11158213	358	0.779817	0.0931346	0.277325	0.974829
	EXOSC4	8	145134326	145135550	235	0.436615	0.301338	0.38168	0.974829
	EXOSC6	16	70284134	70285833	202	0.0815925	0.894183	0.260784	0.974829
	FAHD1	16	1877196	1890208	476	0.425957	0.200275	0.326326	0.974829
	FAM106A	17	18427880	18430160	292	0.0920592	0.720701	0.255195	0.974829
	FAM160B1	10	116581503	116659591	375	0.0950427	0.817605	0.272427	0.974829
	FAM177A1	14	35514113	35582336	373	0.161424	0.837574	0.312976	0.974829
	FAM192A	16	57186378	57220028	536	0.0466559	0.480211	0.136628	0.974829
	FAM19A2	12	62102040	62672931	477	0.627003	0.0325071	0.110066	0.974829
	FAM207A	21	46359925	46396904	598	0.749338	0.126144	0.347404	0.974829
	FAM208A	3	56654573	56717265	445	0.135178	0.632875	0.31606	0.974829
	FAM21A	10	51827648	51893269	262	0.390729	0.0988563	0.133553	0.974829
	FAM21C	10	46222680	46288409	173	0.118842	0.73707	0.323009	0.974829
	FAM220A	7	6369040	6388612	298	0.790206	0.0485319	0.153301	0.974829
	FAM221A	7	23719749	23742868	439	0.118982	0.4307	0.236411	0.974829
	FAM229B	6	112408802	112423993	500	0.207578	0.52769	0.334533	0.974829
	FAM3C	7	120988905	121036418	369	0.142609	0.502561	0.197443	0.974829
	FAM53A	4	1619642	1686029	273	0.496732	0.187442	0.337271	0.974829
	FAM57A	17	635652	646206	395	0.689753	0.0448225	0.0978593	0.974829
	FAM66A	8	12219527	12268510	173	0.469016	0.081966	0.161822	0.974829
	FAM85B	8	8025341	8084136	320	0.8129	0.140869	0.346186	0.974829
	FAM86B2	8	12282913	12293915	187	0.0457372	0.198454	0.0733864	0.974829
	FAM86JP	3	125635463	125648867	408	0.16972	0.496072	0.312512	0.974829
	FAM90A25P	8	12272589	12275599	188	0.469301	0.179554	0.334921	0.974829
	FANCG	9	35073832	35080013	343	0.338712	0.356982	0.369175	0.974829
	FBF1	17	73905655	73937137	402	0.072124	0.901606	0.231264	0.974829
	FBN2	5	127593601	127994878	452	0.574549	0.174725	0.367546	0.974829
	FBXL5	4	15606162	15683284	558	0.151204	0.80649	0.363921	0.974829
	FBXO42	1	16573334	16678949	272	0.0911276	0.692693	0.253901	0.974829
	FCN1	9	137801431	137809809	680	0.132402	0.433539	0.292923	0.974829
	FDPS	1	155278539	155289593	277	0.657708	0.0944268	0.239121	0.974829
	FGFR3	4	1795034	1810599	278	0.100202	0.147396	0.114803	0.974829
	FKBP7	2	179328391	179343327	464	0.349066	0.189188	0.334519	0.974829
	FKRP	19	47249303	47280231	339	0.131962	0.867037	0.366993	0.974829
	FLG-AS1	1	152140601	152339163	376	0.180865	0.161101	0.196049	0.974829
	FLRT3	20	14303634	14318262	415	0.355807	0.116958	0.230735	0.974829
	FLT1	13	28874489	29069265	457	0.587529	0.157651	0.361338	0.974829
	FMO2	1	171154347	171181822	549	0.890912	0.0494921	0.174681	0.974829
	FMO4	1	171283347	171311223	599	0.920461	0.0304046	0.115307	0.974829
	FN3KRP	17	80674559	80688204	367	0.152483	0.285547	0.187583	0.974829
	FOLH1	11	49168187	49230222	168	0.445566	0.0779536	0.124068	0.974829
	FOXN1	17	26833261	26865914	265	0.0373515	0.611563	0.125654	0.974829
	FOXRED1	11	126139040	126148026	651	0.398554	0.0508777	0.0930609	0.974829
	FOXRED2	22	36883237	36903148	642	0.617476	0.0641662	0.153522	0.974829
	FPR1	19	52248425	52307363	604	0.410724	0.101112	0.166691	0.974829
	FPR3	19	52298416	52329442	607	0.709375	0.0332653	0.11739	0.974829
	FRRS1	1	100174259	100231349	467	0.523726	0.156322	0.278784	0.974829
	FRS3	6	41737914	41747638	509	0.173685	0.292223	0.212811	0.974829
	FSTL4	5	132532147	132948255	647	0.178039	0.366954	0.311742	0.974829
	FTOP1	2	43024365	43025852	453	0.877964	0.0973397	0.296154	0.974829
	FTSJ3	17	61896793	61907372	330	0.378439	0.146568	0.292706	0.974829
	FUCA1	1	24171567	24194784	377	0.129158	0.975582	0.370543	0.974829
	FUT10	8	33228342	33330903	252	0.102561	0.300638	0.158118	0.974829
	FXYD5	19	35645633	35660786	487	0.365298	0.257179	0.380812	0.974829
	G6PC2	2	169757750	169766505	570	0.13979	0.779467	0.37851	0.974829
	GABRB3	15	26788693	27184686	472	0.73389	0.076402	0.234821	0.974829
	GALM	2	38893052	38968379	372	0.0601303	0.266318	0.107483	0.974829
	GALR1	18	74962505	74980858	719	0.332634	0.168605	0.255592	0.974829
	GAPT	5	57787262	57792917	523	0.913343	0.0495386	0.174668	0.974829
	GATAD1	7	92076767	92088150	307	0.415793	0.147089	0.273125	0.974829
	GATC	12	120884241	120899389	391	0.985856	0.0605913	0.207602	0.974829
	GBAS	7	56019486	56067874	287	0.0896993	0.338754	0.163812	0.974829
	GBP1P1	1	89873238	89891802	365	0.242348	0.238522	0.287819	0.974829
	GCDH	19	13001840	13025021	323	0.0820177	0.708207	0.166077	0.974829
	GCNT1P1	20	18400804	18402098	464	0.0920029	0.381567	0.152284	0.974829
	GDF9	5	132196873	132202238	411	0.329167	0.497426	0.377593	0.974829
	GEMIN4	17	647654	655899	394	0.834888	0.0394158	0.0915314	0.974829
	GEMIN5	5	154266976	154317769	421	0.687813	0.0498375	0.133986	0.974829
	GEMIN7	19	45582453	45594782	368	0.0490168	0.671277	0.158886	0.974829
	GFPT1	2	69546905	69614382	416	0.956805	0.176985	0.358772	0.974829
	GGCX	2	85772404	85788670	473	0.897743	0.160115	0.31001	0.974829
	GGH	8	63927638	63951730	413	0.0449747	0.573578	0.127155	0.974829
	GIGYF1	7	100277130	100287071	293	0.795463	0.104147	0.289856	0.974829
	GJB6	13	20796110	20806534	452	0.477584	0.276004	0.369021	0.974829
	GLO1	6	38643701	38670917	559	0.537809	0.0743363	0.207823	0.974829
	GLTP	12	110288748	110318293	353	0.703726	0.0395579	0.130925	0.974829
	GMPPB	3	49759317	49761384	318	0.082554	0.685832	0.179031	0.974829
	GNPAT	1	231376953	231413719	488	0.434438	0.133604	0.207291	0.974829
	GNPDA2	4	44684217	44728612	376	0.93589	0.0395517	0.148044	0.974829
	GNRHR	4	68605046	68620078	390	0.124333	0.972226	0.355384	0.974829
	GOLGA6L5	15	85051116	85060045	359	0.916513	0.127404	0.312063	0.974829
	GOSR1	17	28804380	28854610	321	0.0497387	0.380003	0.121229	0.974829
	GP1BA	17	4835592	4838325	447	0.146749	0.639544	0.262964	0.974829
	GPR150	5	94955782	94957846	407	0.0542366	0.535233	0.129346	0.974829
	GPR156	3	119883492	120003941	395	0.348465	0.261652	0.357943	0.974829
	GPR17	2	128403439	128410213	390	0.993468	0.0190202	0.0681015	0.974829
	GPR35	2	241544848	241570676	501	0.372223	0.190232	0.283319	0.974829
	GPRC5B	16	19868908	19897489	434	0.230486	0.0482206	0.0651017	0.974829
	GRIN2B	12	13693165	14133053	486	0.143213	0.621568	0.290597	0.974829
	GRINA	8	145064226	145067583	239	0.0727898	0.875948	0.232106	0.974829
	GRM2	3	51741086	51752629	237	0.394246	0.221811	0.303168	0.974829
	GRWD1	19	48949030	48960279	526	0.0969792	0.257517	0.129739	0.974829
	GS1-124K5.12	7	66010634	66057373	249	0.669814	0.0941241	0.26179	0.974829
	GS1-124K5.2	7	65892936	65918621	246	0.306635	0.072678	0.149865	0.974829
	GS1-124K5.4	7	65958693	65960461	244	0.094555	0.0701835	0.079906	0.974829
	GS1-259H13.2	7	99195689	99208439	311	0.072086	0.547995	0.149051	0.974829
	GSDMA	17	38119226	38134019	300	0.35912	0.11855	0.222377	0.974829
	GSDMD	8	144635377	144645232	357	0.853288	0.0994932	0.272294	0.974829
	GSTA1	6	52656462	52668708	562	0.262802	0.0885965	0.164759	0.974829
	GSTZ1	14	77787228	77797940	549	0.250166	0.33736	0.313597	0.974829
	GTF2F1	19	6379580	6393992	392	0.986375	0.0630415	0.184277	0.974829
	GTF2IRD2	7	74210483	74267847	106	0.25454	0.171168	0.252983	0.974829
	GTPBP1	22	39101728	39134304	374	0.0763679	0.953447	0.248364	0.974829
	GTPBP3	19	17445729	17453544	439	0.235554	0.341195	0.356033	0.974829
	GUF1	4	44680574	44702943	373	0.693863	0.0406533	0.139629	0.974829
	GULP1	2	189156396	189460653	283	0.750949	0.124765	0.34295	0.974829
	GUSBP4	6	58246051	58256569	153	0.275177	0.311159	0.348843	0.974829
	GVINP1	11	6734767	6767670	629	0.759318	0.120572	0.310359	0.974829
	H1FNT	12	48722763	48724062	484	0.155937	0.459527	0.18651	0.974829
	HAAO	2	42994229	43019732	455	0.169401	0.297544	0.183557	0.974829
	HAGH	16	1845621	1876967	476	0.104886	0.421443	0.236429	0.974829
	HAPLN4	19	19366450	19373605	355	0.682608	0.0666027	0.199017	0.974829
	HAR1A	20	61733672	61735738	515	0.152862	0.150506	0.154859	0.974829
	HDAC10	22	50683612	50688288	398	0.300898	0.123795	0.143776	0.974829
	HEATR1	1	236716881	236767804	643	0.584365	0.141802	0.333257	0.974829
	HEATR3	16	50099852	50140298	376	0.523309	0.113479	0.21489	0.974829
	HEATR6	17	58120555	58156292	226	0.135033	0.260438	0.16108	0.974829
	HELB	12	66696325	66737423	503	0.0493412	0.802724	0.122726	0.974829
	HERC2P10	15	31107474	31136356	284	0.30677	0.287696	0.304085	0.974829
	HEXA	15	72635775	72668453	294	0.0701086	0.829001	0.199752	0.974829
	HIP1	7	75162621	75368280	266	0.327701	0.281914	0.329117	0.974829
	HLA-AS1	1	221006105	221006534	396	0.113337	0.1874	0.116741	0.974829
	HLA-F	6	29690552	29706305	42	0.291867	0.395882	0.227678	0.974829
	HLA-F-AS1	6	29702805	29716770	42	0.197207	0.402019	0.366577	0.974829
	HLA-K	6	29894955	29897009	41	0.255348	0.540891	0.349107	0.974829
	HLA-U	6	29901878	29902063	41	0.165299	0.668752	0.295864	0.974829
	HMG20A	15	77712754	77777949	326	0.0817934	0.52111	0.182176	0.974829
	HMGN4	6	26538633	26546482	487	0.0918297	0.542117	0.165999	0.974829
	HN1L	16	1728257	1752281	486	0.0962255	0.065863	0.0723221	0.974829
	HOOK3	8	42752075	42885682	220	0.228919	0.336043	0.242076	0.974829
	HORMAD1	1	150670536	150693364	303	0.740293	0.0627152	0.196798	0.974829
	HOTAIRM1	7	27135713	27139720	419	0.935634	0.111788	0.333152	0.974829
	HOXA1	7	27132612	27135615	419	0.416711	0.145128	0.191427	0.974829
	HOXA2	7	27139885	27142430	414	0.383675	0.160013	0.302512	0.974829
	HOXA4	7	27168380	27170418	392	0.337585	0.264781	0.304516	0.974829
	HOXA6	7	27185015	27187393	397	0.204824	0.13791	0.120926	0.974829
	HOXA7	7	27195586	27197555	396	0.0220025	0.549357	0.065265	0.974829
	HOXB2	17	46618256	46622856	410	0.24526	0.45007	0.378074	0.974829
	HOXD-AS1	2	177037923	177053268	455	0.157178	0.160924	0.176676	0.974829
	HOXD1	2	177053307	177055688	455	0.555382	0.0774741	0.200164	0.974829
	HPS1	10	100175955	100206684	478	0.739683	0.0680446	0.190536	0.974829
	HRNR	1	152184558	152196669	386	0.344883	0.194391	0.337129	0.974829
	HSD17B1	17	40701232	40707231	252	0.531951	0.240952	0.324842	0.974829
	HSD17B1P1	17	40698782	40700724	253	0.767562	0.194748	0.322797	0.974829
	HSD3B7	16	30996519	31000473	231	0.0593627	0.167442	0.100716	0.974829
	HSPA12A	10	118430703	118502085	430	0.769701	0.187366	0.354017	0.974829
	HSPG2	1	22154356	22263790	523	0.726523	0.0341859	0.116185	0.974829
	HTR2B	2	231972944	231989832	428	0.670813	0.197997	0.337968	0.974829
	HYAL3	3	50330476	50333204	329	0.110988	0.350995	0.218696	0.974829
	IDH1-AS1	2	209119971	209120905	372	0.417252	0.175446	0.254752	0.974829
	IFITM4P	6	29718506	29718925	42	0.203068	0.515087	0.361738	0.974829
	IFNG-AS1	12	68383225	68628466	609	0.166217	0.659525	0.279658	0.974829
	IFT140	16	1560459	1662111	481	0.0962345	0.164675	0.0731233	0.974829
	IFT74	9	26956371	27062928	627	0.103662	0.435478	0.143949	0.974829
	IFT81	12	110562140	110656602	272	0.0719209	0.374677	0.135539	0.974829
	IGFL1P1	19	46699495	46700580	418	0.132388	0.157391	0.127437	0.974829
	IGLV1-41	22	22758539	22759053	350	0.249452	0.16018	0.212923	0.974829
	IGLV4-60	22	22516592	22517074	414	0.151142	0.531995	0.256951	0.974829
	IGSF10	3	151143172	151176497	470	0.666679	0.112129	0.206798	0.974829
	IL17RA	22	17565844	17596583	497	0.278426	0.559176	0.319348	0.974829
	IL20RB	3	136676707	136729927	330	0.246979	0.045971	0.0906028	0.974829
	IL21R-AS1	16	27458990	27464714	520	0.576066	0.191538	0.351968	0.974829
	IL27RA	19	14142560	14163743	285	0.490785	0.226446	0.37531	0.974829
	IMMP1L	11	31453948	31531192	268	0.202773	0.196761	0.196302	0.974829
	INPP5A	10	134351324	134596979	480	0.486954	0.167461	0.303401	0.974829
	IQGAP1	15	90931450	91045475	411	0.676558	0.0671549	0.127959	0.974829
	IRAK1BP1	6	79577189	79656157	376	0.400415	0.273468	0.377635	0.974829
	IRGM	5	150226085	150280298	527	0.176593	0.542725	0.361506	0.974829
	ITGB6	2	160956177	161128399	427	0.46319	0.0956775	0.116785	0.974829
	ITPA	20	3189514	3204516	439	0.627305	0.100392	0.261936	0.974829
	ITPRIPL2	16	19125254	19132030	415	0.22731	0.176516	0.236886	0.974829
	JMJD7	15	42120283	42129779	410	0.106898	0.686377	0.296172	0.974829
	KAT8	16	31127075	31142714	243	0.132458	0.168734	0.167875	0.974829
	KCNA2	1	111136202	111174096	531	0.371885	0.285417	0.383447	0.974829
	KCNAB3	17	7825177	7833121	508	0.935334	0.104202	0.31393	0.974829
	KCNC4	1	110753965	110825722	567	0.354653	0.331862	0.230886	0.974829
	KCNH4	17	40308909	40333296	321	0.0683515	0.674011	0.1436	0.974829
	KCNS1	20	43720951	43729753	462	0.757161	0.177838	0.349012	0.974829
	KCNV2	9	2717502	2730037	718	0.0740693	0.196643	0.091728	0.974829
	KCTD10	12	109886461	109915206	428	0.0786952	0.211697	0.129025	0.974829
	KDM2B	12	121866900	122018696	399	0.0619898	0.340696	0.131649	0.974829
	KDM3B	5	137688285	137772717	295	0.0973045	0.980694	0.293765	0.974829
	KDM4B	19	4969125	5153606	419	0.144216	0.271956	0.200005	0.974829
	KHNYN	14	24899141	24910540	558	0.422188	0.130323	0.223585	0.974829
	KIAA0513	16	85061375	85127836	638	0.152332	0.687446	0.375102	0.974829
	KIAA1875	8	145162629	145173218	231	0.042501	0.814804	0.149721	0.974829
	KIAA1984-AS1	9	139698379	139703300	410	0.0850258	0.979598	0.199419	0.974829
	KLHDC4	16	87730091	87799598	468	0.209749	0.563185	0.265291	0.974829
	KLHL30	2	239047363	239061588	491	0.964336	0.0677595	0.221361	0.974829
	KLHL36	16	84682131	84695920	876	0.348426	0.23545	0.222834	0.974829
	KLHL5	4	39046659	39128477	488	0.0603442	0.855994	0.189861	0.974829
	KLKB1	4	187147592	187179625	570	0.0635248	0.981024	0.193755	0.974829
	KMT2A	11	118307205	118397539	461	0.152346	0.586175	0.365892	0.974829
	KNOP1	16	19714902	19729016	450	0.360697	0.100418	0.187893	0.974829
	KNSTRN	15	40674922	40686447	393	0.43269	0.192499	0.337286	0.974829
	KRT18P34	3	156880452	156881721	423	0.864616	0.0245118	0.08049	0.974829
	KRTAP5-1	11	1605572	1606513	400	0.142866	0.564554	0.277736	0.974829
	KRTAP5-9	11	71259466	71260653	361	0.148756	0.043261	0.0674118	0.974829
	LBP	20	36974759	37005665	502	0.120417	0.227252	0.13448	0.974829
	LCA5L	21	40777770	40817729	686	0.0684782	0.666858	0.211608	0.974829
	LDHC	11	18433854	18473605	447	0.0538823	0.37318	0.0894618	0.974829
	LEKR1	3	156543270	156763918	445	0.957444	0.0706236	0.211486	0.974829
	LENG8	19	54960224	54972980	459	0.300134	0.143562	0.171591	0.974829
	LGALS7	19	39261611	39264132	407	0.135847	0.378278	0.205952	0.974829
	LGALS8	1	236681300	236716281	639	0.876362	0.129677	0.37292	0.974829
	LGR5	12	71833550	71980090	433	0.591813	0.0852263	0.138674	0.974829
	LHCGR	2	48859428	48982880	548	0.115458	0.444731	0.266095	0.974829
	LHFPL5	6	35773070	35791852	423	0.659099	0.0901395	0.180562	0.974829
	LIAS	4	39460620	39479273	375	0.595712	0.15872	0.272167	0.974829
	LIG3	17	33307513	33332083	491	0.200397	0.457379	0.375089	0.974829
	LILRA2	19	55084387	55099027	489	0.632897	0.0592775	0.151483	0.974829
	LILRA3	19	54799854	54809952	459	0.511114	0.107114	0.201017	0.974829
	LILRA4	19	54844456	54850421	451	0.270376	0.224573	0.279377	0.974829
	LINC00174	7	65841031	65866325	238	0.339868	0.126306	0.1652	0.974829
	LINC00265	7	39773231	39832691	362	0.567563	0.0729113	0.201168	0.974829
	LINC00299	2	8147901	8523751	501	0.113052	0.429267	0.259193	0.974829
	LINC00323	21	42513427	42520060	585	0.17551	0.499054	0.308551	0.974829
	LINC00339	1	22351681	22357716	520	0.794079	0.0450122	0.156066	0.974829
	LINC00484	9	93921855	93927858	568	0.0578408	0.50915	0.129339	0.974829
	LINC00493	20	18548064	18550207	474	0.255471	0.272427	0.28175	0.974829
	LINC00640	14	51800111	51832275	658	0.230499	0.268001	0.309969	0.974829
	LINC00667	18	5238598	5246507	500	0.0940826	0.722391	0.183079	0.974829
	LINC00674	17	66098049	66111659	320	0.0844352	0.802302	0.180293	0.974829
	LINC00702	10	4243333	4286104	651	0.0622501	0.151962	0.0707709	0.974829
	LINC00839	10	42970991	42990784	243	0.26926	0.609242	0.346558	0.974829
	LINC00861	8	126934552	126963493	482	0.847499	0.0885042	0.266641	0.974829
	LINC00865	10	91589267	91600618	498	0.866915	0.108982	0.258474	0.974829
	LINC00886	3	156465135	156534851	448	0.422931	0.0704826	0.111217	0.974829
	LINC00920	16	66442427	66446038	509	0.897101	0.175023	0.378858	0.974829
	LINC01006	7	156264890	156398458	474	0.0801486	0.812211	0.248778	0.974829
	LINC01013	6	132453055	132490514	512	0.509879	0.150144	0.324729	0.974829
	LINC01060	4	189321890	189602205	492	0.329374	0.363749	0.339834	0.974829
	LIPT1	2	99771428	99779620	298	0.493546	0.156602	0.324226	0.974829
	LL22NC03-2H8.4	22	22648098	22649159	361	0.404928	0.20063	0.319525	0.974829
	LL22NC03-2H8.5	22	22638312	22641586	364	0.678999	0.162269	0.34533	0.974829
	LL22NC03-80A10.6	22	22657589	22664766	357	0.682981	0.12034	0.22282	0.974829
	LL22NC03-86G7.1	22	22292957	22297799	418	0.788972	0.208614	0.368036	0.974829
	LMAN2	5	176758563	176778853	296	0.619688	0.0801702	0.22654	0.974829
	LMBR1L	12	49490919	49504681	314	0.572072	0.185605	0.284323	0.974829
	LMOD1	1	201865580	201915715	476	0.195864	0.368423	0.345553	0.974829
	LRPPRC	2	44113647	44223144	507	0.0762669	0.956608	0.188386	0.974829
	LRRC16A	6	25279306	25620758	651	0.37322	0.142449	0.158419	0.974829
	LRRC19	9	26993134	27005691	651	0.136818	0.360551	0.271834	0.974829
	LRRC27	10	134145614	134195010	463	0.998149	0.0559531	0.190062	0.974829
	LRRC37A5P	9	114353872	114393569	503	0.126882	0.530063	0.29132	0.974829
	LRRC45	17	79981178	79989027	322	0.443692	0.313716	0.38041	0.974829
	LRRC46	17	45908993	45915057	383	0.732399	0.160773	0.373528	0.974829
	LRRC8B	1	89990395	90063423	350	0.796917	0.0424767	0.130323	0.974829
	LSG1	3	194361517	194393206	536	0.0363806	0.667965	0.0815458	0.974829
	LSM4	19	18417040	18434084	387	0.340266	0.278543	0.245033	0.974829
	LSR	19	35739233	35758867	492	0.128122	0.291395	0.192382	0.974829
	LTB4R	14	24782517	24787242	507	0.924945	0.0486213	0.153623	0.974829
	LTB4R2	14	24779346	24781259	504	0.665497	0.0618426	0.171452	0.974829
	LY75	2	160659866	160761260	445	0.207979	0.428852	0.337972	0.974829
	LYAR	4	4269428	4291896	382	0.413011	0.208251	0.378263	0.974829
	LYG1	2	99900701	99921205	311	0.523555	0.158203	0.360588	0.974829
	LYRM9	17	26205340	26220409	312	0.136896	0.0478201	0.0723289	0.974829
	LYSMD1	1	151132226	151138424	319	0.116383	0.776977	0.317719	0.974829
	LZTR1	22	21333751	21353327	377	0.12819	0.645174	0.300245	0.974829
	MAG	19	35783028	35804707	495	0.214415	0.374326	0.330253	0.974829
	MAGEF1	3	184428156	184429836	450	0.254735	0.358087	0.36288	0.974829
	MAN1B1	9	139981379	140003635	369	0.0959113	0.830518	0.216241	0.974829
	MAN2B2	4	6576902	6625089	530	0.147004	0.771497	0.36885	0.974829
	MAN2C1	15	75648133	75660495	233	0.175696	0.448383	0.272432	0.974829
	MANBAL	20	35918041	35945663	329	0.195269	0.203743	0.243756	0.974829
	MAP1B	5	71403061	71505395	450	0.0959326	0.954321	0.302937	0.974829
	MAP2K5	15	67835047	68099461	410	0.264959	0.468295	0.367011	0.974829
	MAP3K2	2	128056306	128146041	440	0.123591	0.368465	0.162552	0.974829
	MAP3K3	17	61699775	61773261	277	0.637278	0.156766	0.345961	0.974829
	MAPK12	22	50687628	50700254	394	0.159768	0.225723	0.219317	0.974829
	MAPK8IP2	22	51039114	51052409	285	0.42161	0.0705856	0.168914	0.974829
	MAPK9	5	179660143	179719099	444	0.652252	0.106901	0.271827	0.974829
	MCFD2	2	47129009	47168994	556	0.471128	0.0972366	0.170545	0.974829
	MCM4	8	48872745	48890720	188	0.153636	0.730243	0.38052	0.974829
	MDGA1	6	37600284	37667082	482	0.187774	0.45493	0.289636	0.974829
	MDH1	2	63815934	63834331	272	0.110263	0.181786	0.153656	0.974829
	MED24	17	38175350	38217468	303	0.212154	0.43204	0.263178	0.974829
	MED28	4	17616254	17635728	419	0.025	0.806994	0.0926041	0.974829
	MED4	13	48627459	48669267	364	0.297228	0.200736	0.290192	0.974829
	MEGF9	9	123363091	123476748	343	0.504628	0.155104	0.29559	0.974829
	MESDC2	15	81239667	81282219	463	0.443322	0.113111	0.234863	0.974829
	MESP1	15	90291892	90294541	398	0.917177	0.165171	0.3577	0.974829
	MESP2	15	90303822	90321982	401	0.348229	0.208097	0.175529	0.974829
	METAP1	4	99916771	99983964	504	0.0398706	0.676923	0.13463	0.974829
	METTL10	10	126436718	126480439	563	0.0889288	0.242396	0.0985527	0.974829
	METTL15	11	28129856	28355054	299	0.123134	0.725254	0.304063	0.974829
	METTL15P1	3	156431673	156432717	429	0.444059	0.0559859	0.0888646	0.974829
	METTL21A	2	208445355	208490652	403	0.547819	0.0241324	0.0712517	0.974829
	METTL21B	12	58165389	58176324	355	0.0715493	0.562021	0.159405	0.974829
	METTL21EP	13	103532449	103548383	712	0.996859	0.103653	0.278606	0.974829
	METTL4	18	2537524	2571508	514	0.0786616	0.359081	0.155423	0.974829
	MFF	2	228189881	228222550	535	0.223126	0.0966398	0.122596	0.974829
	MGA	15	41913422	42062141	413	0.319969	0.231983	0.300751	0.974829
	MGME1	20	17949624	17971765	567	0.413289	0.0734686	0.150868	0.974829
	MGRN1	16	4666494	4740975	421	0.805032	0.128384	0.34181	0.974829
	MIEF1	22	39895437	39914137	395	0.263882	0.390244	0.353632	0.974829
	MIR3916	1	247353153	247372795	465	0.0878726	0.620093	0.156661	0.974829
	MITD1	2	99777890	99797521	303	0.450435	0.127845	0.288196	0.974829
	MLF1IP	4	185616118	185655287	526	0.070241	0.636498	0.186861	0.974829
	MLIP-IT1	6	53863688	53871950	543	0.715077	0.0248116	0.0823944	0.974829
	MMAB	12	109991542	110011679	442	0.103696	0.287265	0.109468	0.974829
	MMS22L	6	97590037	97731086	334	0.820881	0.041215	0.102499	0.974829
	MOV10L1	22	50528308	50600119	407	0.191627	0.355841	0.337141	0.974829
	MPHOSPH6	16	82181403	82203831	754	0.272923	0.0682592	0.124083	0.974829
	MPP5	14	67707826	67802536	394	0.205979	0.385647	0.360825	0.974829
	MPV17L2	19	18303992	18307552	417	0.0377148	0.580926	0.110467	0.974829
	MPZL3	11	118097409	118123065	544	0.27124	0.147047	0.194026	0.974829
	MRC1	10	18098352	18200091	382	0.259134	0.315853	0.321115	0.974829
	MRC1L1	10	17851362	17953178	349	0.141665	0.612267	0.343348	0.974829
	MRGPRX3	11	18142502	18160027	434	0.387326	0.0565056	0.112847	0.974829
	MRI1	19	13875346	13884981	331	0.439229	0.160684	0.308566	0.974829
	MROH6	8	144648357	144655141	358	0.409364	0.0878322	0.17134	0.974829
	MROH8	20	35729629	35807991	317	0.144348	0.302187	0.245323	0.974829
	MRPL10	17	45900638	45908900	383	0.172503	0.12057	0.168346	0.974829
	MRPL18	6	160210844	160219468	560	0.930862	0.133996	0.356384	0.974829
	MRPL39	21	26957968	26979829	378	0.112172	0.448228	0.115669	0.974829
	MRPS10	6	42174539	42185603	415	0.972929	0.0850204	0.263949	0.974829
	MRPS21	1	150266289	150281414	250	0.0375301	0.84992	0.131683	0.974829
	MRPS9	2	105654441	105716418	481	0.10386	0.213519	0.150405	0.974829
	MSH2	2	47630108	47789450	479	0.43026	0.0250591	0.0740408	0.974829
	MSH3	5	79950971	80172279	481	0.761913	0.104787	0.245449	0.974829
	MSI1	12	120779133	120806983	385	0.207962	0.13876	0.19803	0.974829
	MSL1	17	38278551	38293042	305	0.187151	0.0817236	0.132978	0.974829
	MST1L	1	17081405	17096732	291	0.3538	0.217066	0.335284	0.974829
	MSTO2P	1	155715620	155719422	236	0.987471	0.15186	0.343725	0.974829
	MT1A	16	56672578	56673999	533	0.216548	0.213535	0.207173	0.974829
	MTAP	9	21802542	21931646	445	0.239182	0.529962	0.316581	0.974829
	MTBP	8	121457662	121554373	434	0.131955	0.80669	0.355965	0.974829
	MTFR1	8	66556969	66683496	366	0.0954559	0.334119	0.183752	0.974829
	MTMR11	1	149900543	149908791	139	0.679346	0.0974584	0.267994	0.974829
	MTO1	6	74171301	74218959	378	0.140539	0.82141	0.259337	0.974829
	MTRNR2L12	3	96335981	96337000	237	0.0720979	0.692305	0.216036	0.974829
	MUL1	1	20825943	20834654	510	0.168099	0.287431	0.229376	0.974829
	MUM1	19	1285890	1378430	420	0.221925	0.149916	0.185767	0.974829
	MUTYH	1	45794835	45804328	285	0.188525	0.529835	0.326229	0.974829
	MX1	21	42792231	42831141	639	0.0327798	0.694587	0.114372	0.974829
	MXD3	5	176732501	176739758	311	0.104757	0.238476	0.0798728	0.974829
	MYEOV	11	69061605	69182494	446	0.435577	0.19587	0.316983	0.974829
	MYO10	5	16665395	16936372	537	0.137999	0.676027	0.252958	0.974829
	MYOF	10	95066186	95242074	574	0.535879	0.156398	0.333512	0.974829
	MYOM2	8	1993155	2113475	681	0.892424	0.0870124	0.245245	0.974829
	N6AMT1	21	30244513	30257693	473	0.389774	0.162623	0.290714	0.974829
	NAAA	4	76831809	76862102	451	0.312684	0.305554	0.211378	0.974829
	NAGA	22	42454461	42466846	341	0.266615	0.149297	0.190975	0.974829
	NAPG	18	10525902	10552757	676	0.444293	0.148843	0.302976	0.974829
	NAPRT1	8	144656966	144660783	359	0.478702	0.0868547	0.144333	0.974829
	NARF	17	80416056	80448413	402	0.389379	0.156746	0.250648	0.974829
	NBPF1	1	16888814	16940057	276	0.689511	0.161006	0.353841	0.974829
	NBPF2P	1	21751118	21754460	377	0.121438	0.39185	0.168669	0.974829
	NBPF3	1	21766621	21811498	380	0.101575	0.32453	0.148633	0.974829
	NBR1	17	41322498	41363708	291	0.143683	0.901783	0.362	0.974829
	NBR2	17	41277627	41305688	284	0.0585125	0.916552	0.191982	0.974829
	NDUFA10	2	240831867	240964819	559	0.276814	0.122309	0.12264	0.974829
	NDUFA3	19	54606036	54612564	455	0.724262	0.0843595	0.166433	0.974829
	NDUFA6	22	42481529	42486934	351	0.625176	0.132713	0.334488	0.974829
	NDUFA6-AS1	22	42486960	42535286	351	0.713337	0.0592968	0.192455	0.974829
	NDUFAF1	15	41679551	41694717	301	0.472126	0.147635	0.250227	0.974829
	NDUFAF4	6	97337189	97345757	405	0.866585	0.122066	0.316561	0.974829
	NDUFB2	7	140396621	140406446	361	0.239247	0.321675	0.321383	0.974829
	NDUFV1	11	67374323	67380006	261	0.125069	0.855745	0.304041	0.974829
	NEIL2	8	11627148	11644855	477	0.84148	0.118537	0.26292	0.974829
	NELFB	9	140149625	140167998	361	0.24547	0.464559	0.355229	0.974829
	NETO1	18	70409549	70535381	579	0.132644	0.165774	0.104893	0.974829
	NEURL1B	5	172068269	172118543	550	0.565743	0.168772	0.358359	0.974829
	NEXN	1	78381740	78409580	352	0.358114	0.0901042	0.19672	0.974829
	NICN1	3	49460959	49466759	288	0.248985	0.221848	0.290734	0.974829
	NIPAL1	4	47916223	48042188	412	0.0844321	0.996148	0.225636	0.974829
	NIPAL4	5	156887087	156901725	522	0.551785	0.0743246	0.128326	0.974829
	NIT2	3	100053545	100075710	369	0.967461	0.130713	0.376939	0.974829
	NLRP2	19	55464498	55512510	482	0.568664	0.153144	0.348228	0.974829
	NLRP6	11	278365	285359	312	0.0376696	0.63639	0.0772558	0.974829
	NMNAT3	3	139279022	139396859	525	0.1342	0.371542	0.267305	0.974829
	NMRAL1	16	4511681	4545764	426	0.532392	0.129378	0.311505	0.974829
	NMRK1	9	77675489	77703133	444	0.337109	0.201163	0.27644	0.974829
	NNT-AS1	5	43571696	43603228	253	0.877761	0.055122	0.189666	0.974829
	NOMO1	16	14927538	14990017	123	0.326885	0.177432	0.208678	0.974829
	NOS2	17	26083792	26127525	304	0.185496	0.0718955	0.113157	0.974829
	NOTCH2NL	1	145209119	145291972	100	0.258055	0.22492	0.237931	0.974829
	NOXA1	9	140317802	140328815	360	0.241548	0.268435	0.257526	0.974829
	NPC1	18	21086148	21166862	364	0.374632	0.215189	0.336119	0.974829
	NPIPA2	16	14841923	14859270	147	0.954838	0.113941	0.316927	0.974829
	NPIPA5	16	15457516	15474904	237	0.0259644	0.698134	0.0945149	0.974829
	NPLOC4	17	79523913	79604172	319	0.271953	0.171512	0.207247	0.974829
	NRD1	1	52254890	52344477	207	0.077901	0.889342	0.254089	0.974829
	NSG1	4	4349867	4420694	412	0.684066	0.135933	0.357203	0.974829
	NSUN2	5	6599352	6633404	628	0.15657	0.771876	0.283856	0.974829
	NSUN7	4	40751914	40812002	486	0.854474	0.136961	0.382951	0.974829
	NUAK2	1	205271187	205290883	588	0.97009	0.0267235	0.0787128	0.974829
	NUCKS1	1	205681947	205719404	408	0.420002	0.110095	0.151808	0.974829
	NUDT17	1	145586547	145589439	108	0.160885	0.487623	0.285978	0.974829
	NUP160	11	47799639	47870107	261	0.728774	0.0631672	0.163316	0.974829
	NUPR1L	7	56182374	56184093	276	0.091503	0.629281	0.231871	0.974829
	NUTM2A	10	88985205	88996665	271	0.267761	0.301623	0.377009	0.974829
	NUTM2B	10	81462983	81474437	322	0.264053	0.410839	0.35842	0.974829
	NUTM2D	10	89117640	89130452	277	0.505236	0.0864415	0.207309	0.974829
	NUTM2HP	10	52436503	52446086	450	0.865855	0.105041	0.197123	0.974829
	NYAP1	7	100081550	100092422	303	0.138754	0.306948	0.210211	0.974829
	OGFOD3	17	80347099	80373503	366	0.0486782	0.226676	0.102444	0.974829
	OGFR	20	61436187	61445352	501	0.728922	0.0377923	0.102853	0.974829
	OIP5-AS1	15	41576188	41601465	269	0.112203	0.423737	0.178608	0.974829
	OLFML3	1	114522063	114524876	471	0.325593	0.0845348	0.142228	0.974829
	OMA1	1	58881056	59012474	549	0.581312	0.0864364	0.239766	0.974829
	OPRL1	20	62711526	62731996	315	0.44998	0.173359	0.239246	0.974829
	OR1L8	9	125329778	125330838	469	0.154566	0.75998	0.363938	0.974829
	OR2L13	1	248261951	248264224	364	0.0247306	0.661936	0.0750516	0.974829
	OR52K3P	11	4496043	4497123	634	0.112709	0.543635	0.254916	0.974829
	OR7D2	19	9296279	9299493	407	0.579441	0.0469528	0.101922	0.974829
	ORMDL1	2	190635049	190649097	315	0.0725289	0.805212	0.148775	0.974829
	ORMDL3	17	38077294	38083854	293	0.320117	0.219344	0.345605	0.974829
	OS9	12	58087738	58115340	357	0.851044	0.101998	0.301925	0.974829
	OSCAR	19	54597933	54606000	455	0.200328	0.18523	0.173367	0.974829
	OXLD1	17	79632066	79633393	325	0.950822	0.129022	0.378739	0.974829
	P2RX4	12	121647660	121671909	417	0.222312	0.101432	0.12989	0.974829
	P2RY12	3	151055168	151102600	500	0.953894	0.0845796	0.211002	0.974829
	P4HA2	5	131527531	131631008	411	0.260589	0.634963	0.382394	0.974829
	P4HTM	3	49027422	49044494	264	0.768908	0.10672	0.30636	0.974829
	PAPD4	5	78908243	78982471	435	0.0432821	0.287836	0.0855522	0.974829
	PAPOLA	14	96968710	97033448	551	0.171907	0.452717	0.344276	0.974829
	PARK7	1	8014351	8045565	425	0.840852	0.0910458	0.280745	0.974829
	PARP10	8	145051321	145086940	244	0.0759763	0.884258	0.242331	0.974829
	PARP8	5	49961733	50142356	265	0.335595	0.145653	0.233202	0.974829
	PASK	2	242045514	242088919	423	0.0696925	0.968714	0.216712	0.974829
	PAX6	11	31806340	31839509	382	0.892166	0.102282	0.227837	0.974829
	PCCB	3	135969148	136055076	282	0.0388195	0.379164	0.0856688	0.974829
	PCGF2	17	36891298	36904631	349	0.167217	0.89917	0.296979	0.974829
	PCM1	8	17780349	17885478	871	0.171993	0.619128	0.377762	0.974829
	PCMTD1	8	52730140	52811735	428	0.029167	0.323145	0.0692409	0.974829
	PCNX	14	71374122	71582099	410	0.51311	0.0512093	0.128272	0.974829
	PCOLCE-AS1	7	100187025	100201581	287	0.0446111	0.527245	0.124463	0.974829
	PCP2	19	7697279	7698634	415	0.1303	0.924672	0.377963	0.974829
	PCYOX1L	5	148737570	148749216	578	0.0261123	0.513166	0.079788	0.974829
	PDCD6	5	271736	315089	291	0.289144	0.424496	0.378128	0.974829
	PDGFD	11	103777914	104035107	438	0.145175	0.949981	0.354257	0.974829
	PDHB	3	58413357	58419584	433	0.759501	0.116524	0.327965	0.974829
	PDPK2	16	2666122	2693297	308	0.0656626	0.912719	0.204304	0.974829
	PDXDC2P	16	70023988	70099851	188	0.0680991	0.993411	0.213445	0.974829
	PEBP1	12	118573832	118583389	507	0.10142	0.823767	0.300252	0.974829
	PEPD	19	33877856	34012700	467	0.10107	0.640387	0.262836	0.974829
	PFKM	12	48498922	48540187	518	0.13487	0.424982	0.211696	0.974829
	PGAP3	17	37827375	37853050	318	0.720324	0.13602	0.352038	0.974829
	PGBD1	6	28249314	28270326	419	0.113524	0.594667	0.274483	0.974829
	PGM2	4	37828255	37864558	672	0.0735332	0.289748	0.139902	0.974829
	PHACTR1	6	12717893	13288645	501	0.0351898	0.73377	0.0964304	0.974829
	PHLPP2	16	71678654	71758604	439	0.122295	0.585741	0.258496	0.974829
	PIAS1	15	68346517	68483042	452	0.371101	0.233616	0.23787	0.974829
	PIAS2	18	44388353	44500111	520	0.27466	0.40996	0.347026	0.974829
	PIGP	21	38431470	38445470	435	0.215369	0.059187	0.11339	0.974829
	PILRB	7	99949799	99965356	294	0.204866	0.659656	0.368746	0.974829
	PINLYP	19	44081344	44086256	393	0.105465	0.815158	0.310192	0.974829
	PLA2G4C	19	48551100	48614074	519	0.110066	0.455461	0.176281	0.974829
	PLAC8	4	84011201	84058228	449	0.964296	0.109888	0.314352	0.974829
	PLEC	8	144989321	145050902	244	0.0560857	0.939499	0.191416	0.974829
	PLGLB1	2	87229682	87248975	124	0.497305	0.156454	0.262146	0.974829
	PM20D1	1	205797150	205819260	370	0.541164	0.125277	0.229546	0.974829
	PMS2	7	6012870	6048756	344	0.86922	0.0517257	0.142336	0.974829
	PMS2P5	7	74306894	74366314	100	0.302753	0.213028	0.165939	0.974829
	PNLDC1	6	160221298	160241736	560	0.60021	0.184147	0.35738	0.974829
	PNP	14	20937113	20945253	659	0.197453	0.562578	0.319681	0.974829
	PNPO	17	46018872	46025654	376	0.763045	0.113301	0.304084	0.974829
	POC5	5	74969949	75013313	386	0.208389	0.13322	0.0881753	0.974829
	POGK	1	166808681	166825581	606	0.0565812	0.293768	0.107864	0.974829
	POLDIP2	17	26674036	26684545	271	0.924191	0.0919461	0.28211	0.974829
	POLI	18	51795774	51847636	333	0.961479	0.122054	0.302552	0.974829
	POLR1D	13	28194903	28241548	529	0.746258	0.157453	0.288425	0.974829
	POLR2B	4	57844990	57896565	546	0.247223	0.0480466	0.0740545	0.974829
	POLR3H	22	41921808	41940610	304	0.840725	0.124809	0.339189	0.974829
	POMZP3	7	76239303	76255000	161	0.193887	0.310415	0.260024	0.974829
	PON1	7	94926988	94954019	442	0.0395622	0.731216	0.115893	0.974829
	PPEF2	4	76781020	76823724	446	0.320433	0.329491	0.345352	0.974829
	PPIE	1	40157854	40229586	389	0.504251	0.214163	0.376059	0.974829
	PPIHP1	11	111900582	111901091	348	0.399318	0.0574213	0.128014	0.974829
	PPP1CB	2	28974506	29025806	527	0.0501234	0.760854	0.156654	0.974829
	PPP1R13B	14	104200089	104313927	329	0.0401331	0.818927	0.107574	0.974829
	PPP1R21	2	48667737	48742525	428	0.459939	0.0339729	0.0945192	0.974829
	PPP1R9A	7	94536514	94925727	354	0.0592454	0.693538	0.127737	0.974829
	PPP2R1B	11	111606005	111637151	371	0.42814	0.138049	0.28062	0.974829
	PPP2R5E	14	63838075	64010092	366	0.106027	0.69588	0.276244	0.974829
	PPP5C	19	46850251	46896238	413	0.21334	0.629936	0.383455	0.974829
	PPP6R2	22	50781733	50883428	369	0.419458	0.17329	0.338691	0.974829
	PQLC2	1	19638820	19655794	488	0.0208967	0.472318	0.0652279	0.974829
	PRDM11	11	45115564	45247734	585	0.0617242	0.169801	0.0915188	0.974829
	PRDM15	21	43218385	43299591	783	0.0660513	0.717446	0.133749	0.974829
	PRDM5	4	121606074	121844025	453	0.633574	0.0495918	0.13956	0.974829
	PRDM8	4	81105033	81125483	366	0.271246	0.137609	0.191123	0.974829
	PRELID2P1	12	69351157	69351369	466	0.14217	0.599753	0.295172	0.974829
	PRICKLE4	6	41748087	41755399	508	0.0343844	0.634842	0.0729262	0.974829
	PRIMPOL	4	185570767	185615771	576	0.119549	0.583731	0.23422	0.974829
	PRKXP1	15	101093734	101099159	592	0.239274	0.36007	0.311617	0.974829
	PRND	20	4702556	4709106	635	0.0519412	0.240094	0.081339	0.974829
	PROCA1	17	27030215	27038872	315	0.101241	0.548077	0.229357	0.974829
	PRPF6	20	62612488	62664453	375	0.691794	0.149893	0.366036	0.974829
	PRRC2C	1	171454651	171562650	592	0.798083	0.0522381	0.168876	0.974829
	PRSS51	8	10340388	10405095	711	0.447368	0.11754	0.219332	0.974829
	PRSS53	16	31095518	31100284	239	0.072929	0.182219	0.11955	0.974829
	PRSS55	8	10383056	10411676	715	0.588133	0.178149	0.335446	0.974829
	PSG4	19	43696854	43709926	240	0.030557	0.336822	0.0660027	0.974829
	PSMB3	17	36908989	36920484	352	0.10855	0.933663	0.303218	0.974829
	PSMC3	11	47440320	47447993	288	0.433796	0.292257	0.331442	0.974829
	PSMD13	11	236546	252981	294	0.204979	0.371241	0.257541	0.974829
	PSMD5-AS1	9	123587106	123616651	359	0.0354695	0.532735	0.104214	0.974829
	PSMG4	6	3231637	3303607	615	0.608476	0.192277	0.298435	0.974829
	PSPH	7	56078744	56119297	277	0.136353	0.369738	0.247355	0.974829
	PSPHP1	7	55832490	55840981	354	0.0924336	0.730376	0.263783	0.974829
	PTBP2	1	97187221	97289294	418	0.110984	0.382907	0.112443	0.974829
	PTCHD3	10	27687116	27703297	452	0.570277	0.0912771	0.248174	0.974829
	PTDSS2	11	448268	491387	386	0.230326	0.394846	0.335911	0.974829
	PTPRCAP	11	67202981	67205518	242	0.104542	0.730036	0.247026	0.974829
	PTTG1IP	21	46269500	46293752	568	0.7241	0.0950005	0.266131	0.974829
	PTX3	3	157154578	157161417	438	0.341502	0.0349983	0.0722966	0.974829
	PXK	3	58318607	58411748	456	0.879283	0.0505334	0.178963	0.974829
	PYROXD1	12	21590549	21623300	553	0.0539464	0.617451	0.117434	0.974829
	PYROXD2	10	100143322	100174941	494	0.301976	0.0912946	0.151525	0.974829
	QRICH1	3	49067140	49131796	255	0.46398	0.175683	0.313058	0.974829
	RAB34	17	27041299	27045447	317	0.225643	0.39656	0.372601	0.974829
	RAB3GAP2	1	220321635	220445796	380	0.222589	0.342067	0.235562	0.974829
	RAB43	3	128806412	128841644	317	0.466483	0.113329	0.269655	0.974829
	RAB5C	17	40276994	40307016	320	0.171482	0.702349	0.304924	0.974829
	RABAC1	19	42460833	42463542	230	0.427835	0.0432336	0.123811	0.974829
	RABGEF1	7	66147151	66273051	236	0.806626	0.059572	0.194303	0.974829
	RABGGTB	1	76252384	76260764	461	0.0971585	0.183028	0.15172	0.974829
	RABL2B	22	51205929	51222091	194	0.189557	0.105504	0.0883821	0.974829
	RACGAP1	12	50370706	50426919	327	0.293448	0.371884	0.381037	0.974829
	RAD54L2	3	51575596	51702683	242	0.0766292	0.500396	0.185603	0.974829
	RAD9A	11	67159176	67165653	257	0.7016	0.0968162	0.21265	0.974829
	RAMP2-AS1	17	40905932	40913211	261	0.625683	0.0963812	0.243076	0.974829
	RANBP10	16	67757005	67840555	231	0.167755	0.644999	0.307709	0.974829
	RAPGEF3	12	48128455	48164823	540	0.846024	0.083004	0.261957	0.974829
	RAPGEF6	5	130759614	130970929	291	0.125576	0.483551	0.257783	0.974829
	RAPGEFL1	17	38333263	38351908	295	0.454941	0.0434292	0.12461	0.974829
	RASA4	7	102220093	102257204	214	0.130116	0.180603	0.169609	0.974829
	RASA4B	7	102123590	102158228	239	0.0803693	0.369745	0.149066	0.974829
	RBBP5	1	205055270	205091143	602	0.686362	0.0463898	0.0941967	0.974829
	RBM26-AS1	13	79980444	79998463	395	0.0469418	0.810138	0.145315	0.974829
	RBM43	2	152104454	152118393	455	0.288937	0.350411	0.376781	0.974829
	RBM44	2	238707388	238751450	529	0.0690788	0.308953	0.0832222	0.974829
	RBM6	3	49977440	50114683	340	0.114436	0.708355	0.167775	0.974829
	RBMS3-AS3	3	29305685	29332217	590	0.240642	0.310384	0.257309	0.974829
	RCSD1	1	167599330	167675486	576	0.179983	0.137237	0.152054	0.974829
	RCVRN	17	9799637	9808938	635	0.456036	0.0293164	0.0788138	0.974829
	RFPL3S	22	32755893	32778039	648	0.0946982	0.164266	0.114409	0.974829
	RGS14	5	176784838	176799602	294	0.448969	0.159165	0.323163	0.974829
	RGS22	8	100973164	101143496	366	0.129962	0.627417	0.325389	0.974829
	RHOBTB2	8	22844930	22877645	588	0.249315	0.259691	0.289711	0.974829
	RHOD	11	66824289	66839484	251	0.102887	0.561078	0.197718	0.974829
	RHOT1	17	30469733	30580393	310	0.0380368	0.61949	0.126864	0.974829
	RIC8A	11	207511	215113	280	0.234232	0.515747	0.350725	0.974829
	RIT1	1	155867599	155881195	282	0.49828	0.102554	0.258919	0.974829
	RN7SL417P	15	84948770	84949050	289	0.940423	0.166813	0.309489	0.974829
	RNASEH2B	13	51483814	51544592	531	0.083497	0.799988	0.256621	0.974829
	RNF123	3	49726935	49753910	316	0.143729	0.656545	0.234273	0.974829
	RNF144A	2	7057523	7208417	597	0.05774	0.138038	0.0751311	0.974829
	RNF157	17	74138534	74236454	423	0.0644664	0.894951	0.208143	0.974829
	RNF166	16	88762903	88772829	386	0.174249	0.475815	0.334991	0.974829
	RNF216P1	7	5013619	5080306	355	0.754578	0.0325917	0.0962242	0.974829
	ROM1	11	62379884	62382592	385	0.119098	0.442823	0.136065	0.974829
	RP1-130H16.16	22	30770930	30773834	440	0.0557978	0.767482	0.11097	0.974829
	RP1-152L7.5	6	52530072	52531676	580	0.599678	0.0958845	0.250245	0.974829
	RP1-178F15.4	1	153603914	153606873	405	0.0760659	0.199264	0.0665704	0.974829
	RP1-228P16.1	12	48448596	48449374	521	0.205227	0.434154	0.31688	0.974829
	RP1-313I6.12	6	28046570	28048752	485	0.787687	0.102652	0.225535	0.974829
	RP1-79C4.4	1	170636522	170638566	456	0.685347	0.0633412	0.200527	0.974829
	RP1-83M4.2	6	144521584	144522102	395	0.689178	0.0645326	0.172796	0.974829
	RP1-8B1.4	6	46064830	46097443	506	0.481449	0.139596	0.315992	0.974829
	RP11-1017G21.5	14	102414684	102415762	340	0.111116	0.39972	0.237469	0.974829
	RP11-1105G2.3	12	94671534	94676620	666	0.516989	0.2663	0.382862	0.974829
	RP11-114F10.2	12	106444739	106452032	598	0.250502	0.262478	0.224546	0.974829
	RP11-120K9.2	15	50849798	50852489	361	0.114087	0.270876	0.20651	0.974829
	RP11-1277A3.3	5	176981825	176982365	241	0.94511	0.0349358	0.130984	0.974829
	RP11-134G8.8	1	201433511	201434274	660	0.417215	0.108733	0.16352	0.974829
	RP11-134K13.4	6	71306141	71306683	498	0.0890617	0.214016	0.0762322	0.974829
	RP11-1407O15.2	17	36351796	36421841	280	0.609446	0.0265719	0.0800945	0.974829
	RP11-141C7.4	3	195366861	195367331	284	0.0776553	0.680253	0.231945	0.974829
	RP11-151A6.4	13	101187995	101232371	499	0.71843	0.0556543	0.119533	0.974829
	RP11-151D14.1	9	75486644	75489025	413	0.287293	0.471941	0.355993	0.974829
	RP11-156P1.3	17	45061411	45177689	300	0.175276	0.315664	0.199799	0.974829
	RP11-157J24.2	6	1528599	1529146	707	0.914902	0.0315236	0.1204	0.974829
	RP11-157P1.4	20	60880488	60881381	468	0.0368083	0.332998	0.0852937	0.974829
	RP11-159F24.5	5	43515376	43525412	255	0.52583	0.167835	0.359884	0.974829
	RP11-165F24.2	9	477750	478423	695	0.787592	0.154184	0.287029	0.974829
	RP11-166B2.1	16	12021230	12070500	454	0.53904	0.231625	0.354921	0.974829
	RP11-166B2.7	16	12070708	12071707	455	0.467995	0.23513	0.319842	0.974829
	RP11-166O4.6	7	66798034	66799370	368	0.708373	0.0612398	0.19349	0.974829
	RP11-168G16.2	15	100913144	100978119	559	0.0937565	0.334413	0.185372	0.974829
	RP11-173M1.8	17	25641669	25642952	276	0.32987	0.159564	0.200133	0.974829
	RP11-176H8.1	14	31896713	31897394	308	0.722859	0.153381	0.374525	0.974829
	RP11-177J6.1	4	56254116	56254438	392	0.0992994	0.505851	0.252017	0.974829
	RP11-182J1.14	15	84944427	84950601	284	0.643655	0.123896	0.217541	0.974829
	RP11-182J1.16	15	84841242	84850986	254	0.90001	0.173456	0.328419	0.974829
	RP11-190A12.8	1	159836744	159837475	512	0.0996257	0.240555	0.104671	0.974829
	RP11-195F19.9	9	34678097	34681295	365	0.52613	0.134232	0.230424	0.974829
	RP11-196G11.2	16	31054471	31061201	241	0.135545	0.0939118	0.11907	0.974829
	RP11-196G18.22	1	149816065	149820591	120	0.436491	0.289997	0.377472	0.974829
	RP11-212P7.2	7	128164070	128171123	373	0.181821	0.990487	0.354603	0.974829
	RP11-214N9.1	2	9696028	9696904	477	0.583136	0.142574	0.268429	0.974829
	RP11-218F10.3	4	164450923	164451849	399	0.535523	0.109708	0.246242	0.974829
	RP11-218M22.1	12	740057	772493	457	0.680192	0.0391682	0.0990043	0.974829
	RP11-219D15.3	3	139067866	139068169	424	0.305094	0.0322319	0.066501	0.974829
	RP11-21L23.3	11	76493625	76494106	474	0.150043	0.456105	0.318768	0.974829
	RP11-225B17.2	7	32798494	32798965	411	0.461049	0.0572295	0.128044	0.974829
	RP11-229P13.20	9	139931492	139932407	368	0.0405519	0.94078	0.0844146	0.974829
	RP11-250B2.3	6	81153061	81175644	415	0.798771	0.115796	0.204306	0.974829
	RP11-250B2.6	6	81065141	81066576	440	0.423485	0.0503399	0.0802028	0.974829
	RP11-252A24.2	16	74366512	74394757	362	0.323472	0.407138	0.262239	0.974829
	RP11-259O2.1	5	1933977	1959290	645	0.175482	0.309512	0.271719	0.974829
	RP11-261P9.4	20	57285851	57286689	552	0.367272	0.308934	0.366999	0.974829
	RP11-266A24.1	11	23186446	23224707	510	0.835986	0.0875263	0.268202	0.974829
	RP11-266L9.3	16	25104708	25106576	399	0.316739	0.376398	0.367448	0.974829
	RP11-266L9.4	16	25043202	25069430	402	0.129955	0.308351	0.148993	0.974829
	RP11-274H2.5	3	145777372	145779466	433	0.122762	0.928336	0.347848	0.974829
	RP11-282O18.3	12	123736577	123745527	349	0.201856	0.880326	0.37608	0.974829
	RP11-286E11.2	4	108858503	108862411	381	0.949041	0.0873586	0.262187	0.974829
	RP11-286H15.1	2	128383572	128384423	405	0.112883	0.0579425	0.0755742	0.974829
	RP11-290H9.4	17	45380832	45395986	345	0.192392	0.806408	0.373818	0.974829
	RP11-292F22.7	10	47656084	47657233	56	0.0964989	0.559929	0.24545	0.974829
	RP11-295M18.2	1	221002597	221005771	402	0.122782	0.212064	0.180923	0.974829
	RP11-295M18.6	1	221002018	221002553	402	0.0909773	0.207309	0.0949099	0.974829
	RP11-296I10.6	16	70253477	70279519	200	0.0923225	0.912677	0.277231	0.974829
	RP11-298O21.5	3	167613736	167641799	342	0.665657	0.16555	0.378437	0.974829
	RP11-302L19.3	6	170493905	170494884	437	0.152729	0.520451	0.203394	0.974829
	RP11-304F15.3	17	47923272	47926199	424	0.366214	0.0772991	0.0935036	0.974829
	RP11-305L7.6	9	93881344	93945044	561	0.257645	0.45847	0.352309	0.974829
	RP11-314C16.1	6	8784411	8785678	400	0.25148	0.408433	0.298098	0.974829
	RP11-315I20.1	1	145475982	145508474	108	0.878767	0.132696	0.366009	0.974829
	RP11-321G12.1	15	63682335	63729347	440	0.196347	0.966304	0.362452	0.974829
	RP11-332H14.2	2	105950484	105953815	574	0.375104	0.105208	0.170924	0.974829
	RP11-334C17.5	17	78174472	78179748	484	0.0503647	0.32099	0.0959445	0.974829
	RP11-345P4.9	1	1549138	1551175	294	0.490212	0.161751	0.346479	0.974829
	RP11-347I19.8	12	122235417	122235778	338	0.373849	0.154758	0.145202	0.974829
	RP11-34A14.3	10	100011780	100016332	525	0.324072	0.167197	0.293598	0.974829
	RP11-350J20.5	6	150117711	150119308	467	0.180553	0.535134	0.331681	0.974829
	RP11-350N15.6	8	38265566	38265729	279	0.121509	0.783521	0.322793	0.974829
	RP11-359I18.5	3	58476557	58477018	420	0.525615	0.091161	0.230754	0.974829
	RP11-360F5.1	4	39114297	39121905	461	0.087692	0.749067	0.187429	0.974829
	RP11-360F5.3	4	39135533	39137228	455	0.115985	0.797882	0.261011	0.974829
	RP11-368I7.4	16	89749028	89752977	420	0.0703479	0.861297	0.229176	0.974829
	RP11-369K16.1	8	12815896	12819709	548	0.863991	0.0623971	0.208407	0.974829
	RP11-378A13.1	2	219120042	219122087	449	0.856668	0.128129	0.246871	0.974829
	RP11-380O24.1	3	9334272	9397543	546	0.172843	0.497135	0.351918	0.974829
	RP11-384K6.6	4	119512928	119553428	339	0.115079	0.711998	0.234762	0.974829
	RP11-386G11.10	12	49524954	49541652	311	0.844278	0.146713	0.357426	0.974829
	RP11-387H17.4	17	38083995	38095854	293	0.360545	0.0962471	0.202745	0.974829
	RP11-388C12.1	17	80671784	80674131	367	0.729636	0.0548211	0.182255	0.974829
	RP11-388M20.6	16	31193832	31194606	250	0.238692	0.0972897	0.12423	0.974829
	RP11-399D6.2	9	22646199	22824212	424	0.622144	0.151125	0.353883	0.974829
	RP11-399E6.1	1	41708045	41750533	430	0.223703	0.287171	0.193603	0.974829
	RP11-403A21.2	18	21574177	21595303	432	0.797725	0.0767823	0.164876	0.974829
	RP11-411B10.4	18	14074911	14075740	291	0.323255	0.103254	0.139294	0.974829
	RP11-417E7.1	6	169558187	169563019	632	0.7284	0.0530609	0.174981	0.974829
	RP11-417E7.2	6	169575401	169582835	629	0.586824	0.0802424	0.222445	0.974829
	RP11-421F16.3	12	27124519	27132515	515	0.926786	0.0577196	0.198756	0.974829
	RP11-421L10.1	1	221503422	221509638	448	0.145538	0.457832	0.237987	0.974829
	RP11-423H2.1	5	177236408	177377733	303	0.765689	0.0389567	0.116393	0.974829
	RP11-428J1.4	6	5031990	5054657	634	0.810995	0.136921	0.345051	0.974829
	RP11-429J17.2	8	144778324	144780583	336	0.36684	0.113474	0.232669	0.974829
	RP11-432J22.2	9	138799658	138805359	429	0.775932	0.133925	0.312638	0.974829
	RP11-434I12.2	8	74209946	74268696	512	0.515313	0.211939	0.312301	0.974829
	RP11-439C15.4	8	1920736	1922803	700	0.76663	0.0462386	0.156099	0.974829
	RP11-439E19.9	1	246845410	246848377	451	0.219343	0.285408	0.186825	0.974829
	RP11-457M11.5	6	26686469	26688192	444	0.25362	0.403729	0.289929	0.974829
	RP11-458F8.2	7	66345695	66347968	217	0.257054	0.18669	0.169943	0.974829
	RP11-463O9.9	16	86553989	86557503	931	0.0859703	0.785231	0.217937	0.974829
	RP11-464O2.2	10	126392194	126402786	569	0.49455	0.0480282	0.141904	0.974829
	RP11-469N6.1	11	134605490	134633704	569	0.175367	0.178056	0.205334	0.974829
	RP11-477N3.1	2	54309691	54312203	453	0.150351	0.508266	0.228221	0.974829
	RP11-483C6.1	14	27061953	27063723	424	0.767752	0.0907896	0.27608	0.974829
	RP11-486L19.2	16	84226164	84228871	964	0.618618	0.193016	0.376748	0.974829
	RP11-488L18.10	1	247350583	247351828	466	0.161339	0.7281	0.32896	0.974829
	RP11-496N12.6	1	225634945	225653045	407	0.118429	0.877102	0.343625	0.974829
	RP11-497H17.1	17	80876158	80876661	313	0.303798	0.24264	0.332943	0.974829
	RP11-49K24.8	18	44632317	44633773	539	0.647739	0.0461445	0.138996	0.974829
	RP11-502I4.3	15	67833410	67834942	410	0.135646	0.867822	0.316738	0.974829
	RP11-506M13.3	10	81420647	81437248	334	0.611115	0.122976	0.222894	0.974829
	RP11-507B12.1	15	61931548	62007370	529	0.533107	0.149695	0.331573	0.974829
	RP11-507B12.2	15	61592525	61927648	557	0.430558	0.198354	0.370977	0.974829
	RP11-507K2.2	14	88965678	88981433	472	0.106284	0.94327	0.325006	0.974829
	RP11-509J21.1	9	3526723	3671646	546	0.575478	0.159602	0.34162	0.974829
	RP11-509J21.3	9	3674546	3691814	632	0.832556	0.102945	0.308203	0.974829
	RP11-509J21.4	9	3684076	3689626	645	0.209697	0.136772	0.206138	0.974829
	RP11-50E11.3	10	52384924	52401211	427	0.223914	0.263662	0.243954	0.974829
	RP11-517C16.2	16	84492865	84500967	896	0.0500261	0.625989	0.138783	0.974829
	RP11-526I2.5	15	101087972	101090358	590	0.267574	0.331045	0.340272	0.974829
	RP11-528I4.2	4	56413306	56414056	403	0.946413	0.0806775	0.262676	0.974829
	RP11-535M15.1	9	99449338	99483403	281	0.110506	0.401181	0.130401	0.974829
	RP11-536G4.2	12	96189123	96252617	587	0.143991	0.782871	0.252636	0.974829
	RP11-538D16.2	1	182031812	182038388	487	0.304363	0.0357381	0.0829168	0.974829
	RP11-53B2.2	18	13486461	13490675	497	0.0323315	0.401218	0.0882897	0.974829
	RP11-53O19.3	5	44826178	44828694	225	0.214965	0.731302	0.377402	0.974829
	RP11-545I5.3	6	146136048	146205942	265	0.3117	0.43759	0.357874	0.974829
	RP11-54A4.2	1	150521040	150530200	290	0.540692	0.155685	0.299025	0.974829
	RP11-554A11.9	11	68923378	68927220	450	0.148372	0.263325	0.186126	0.974829
	RP11-554D14.7	12	108226635	108228807	479	0.982571	0.11057	0.324321	0.974829
	RP11-564C4.6	10	52415727	52420232	439	0.291878	0.239268	0.261677	0.974829
	RP11-566J3.4	14	101203922	101204561	468	0.0889658	0.462729	0.192761	0.974829
	RP11-572O17.1	4	1714548	1715349	273	0.400134	0.150835	0.287671	0.974829
	RP11-579D7.8	12	49194359	49194869	351	0.0295065	0.541827	0.0909653	0.974829
	RP11-57H12.5	1	95708781	95729610	488	0.932612	0.129128	0.249955	0.974829
	RP11-588K22.2	4	156655600	156658214	456	0.0885693	0.797984	0.252249	0.974829
	RP11-593F23.1	15	76467232	76473827	279	0.0778051	0.41271	0.164038	0.974829
	RP11-597D13.7	4	159191530	159199828	293	0.471705	0.260189	0.369263	0.974829
	RP11-611E13.2	12	70297813	70636673	575	0.0457577	0.177685	0.0772754	0.974829
	RP11-616M22.5	16	1307340	1308059	447	0.571511	0.0523759	0.144023	0.974829
	RP11-617D20.1	4	38614322	38666504	589	0.0487124	0.399061	0.09492	0.974829
	RP11-620J15.2	12	58263618	58290265	403	0.0727579	0.424021	0.150682	0.974829
	RP11-64D22.2	3	151488216	151502682	447	0.0382203	0.622799	0.114146	0.974829
	RP11-660L16.2	11	71159720	71163203	365	0.0630526	0.169072	0.0920392	0.974829
	RP11-661A12.12	8	144714241	144715926	350	0.769516	0.0866823	0.225723	0.974829
	RP11-661A12.5	8	144624143	144631899	359	0.666992	0.088103	0.198048	0.974829
	RP11-661A12.9	8	144655660	144659438	359	0.517596	0.0966337	0.17825	0.974829
	RP11-669E14.4	17	43985036	43988145	32	0.471745	0.14168	0.19641	0.974829
	RP11-672A2.1	11	76423440	76430652	491	0.123678	0.351627	0.232121	0.974829
	RP11-672A2.4	11	76365213	76367756	478	0.528011	0.203579	0.365124	0.974829
	RP11-676J12.6	17	781142	783333	406	0.980761	0.0392095	0.0896175	0.974829
	RP11-686D22.4	17	33730856	33731392	370	0.183325	0.653838	0.376634	0.974829
	RP11-686O6.2	2	203239655	203240327	335	0.0507926	0.896552	0.180054	0.974829
	RP11-693N9.2	11	104772276	104789800	344	0.147309	0.54164	0.321534	0.974829
	RP11-697E2.7	15	90818266	90820841	408	0.24671	0.0933579	0.108169	0.974829
	RP11-6L6.2	4	147145709	147150208	357	0.312506	0.0413408	0.0799761	0.974829
	RP11-6N17.4	17	45968621	45973178	380	0.58153	0.136772	0.320596	0.974829
	RP11-700J17.1	4	44695963	44696403	374	0.852186	0.042982	0.15543	0.974829
	RP11-720L2.3	18	317099	317366	446	0.142439	0.498569	0.316006	0.974829
	RP11-722E23.2	8	33218361	33218933	241	0.146085	0.251373	0.169761	0.974829
	RP11-728K20.1	7	149589363	149606793	260	0.394119	0.123343	0.223517	0.974829
	RP11-738E22.3	4	57827093	57827539	547	0.180747	0.0639204	0.0965549	0.974829
	RP11-73M7.6	1	32109650	32125539	352	0.341014	0.212186	0.297446	0.974829
	RP11-745O10.2	12	66524549	66528229	483	0.499242	0.167053	0.327087	0.974829
	RP11-74E22.6	17	2591767	2592254	440	0.300517	0.223745	0.187355	0.974829
	RP11-75C9.1	9	8858130	8862255	761	0.162147	0.298428	0.189593	0.974829
	RP11-797H7.3	7	64323377	64324748	265	0.820797	0.0877263	0.183723	0.974829
	RP11-797H7.5	7	64348905	64350478	257	0.593037	0.106232	0.212018	0.974829
	RP11-798G7.5	17	43580626	43612076	157	0.377672	0.368957	0.284959	0.974829
	RP11-7F17.3	14	77535847	77542687	553	0.201135	0.341302	0.32398	0.974829
	RP11-80A15.1	14	24970800	24977894	588	0.597542	0.169127	0.33126	0.974829
	RP11-80H8.4	3	142842204	142850735	548	0.51379	0.16403	0.251286	0.974829
	RP11-831A10.1	11	119879313	119882867	495	0.100233	0.661101	0.269029	0.974829
	RP11-845C23.2	18	56038798	56039898	555	0.456858	0.0586474	0.130067	0.974829
	RP11-849H4.4	11	71727307	71731956	244	0.309637	0.280618	0.355252	0.974829
	RP11-861E21.2	18	12438889	12446510	410	0.0899832	0.501142	0.198851	0.974829
	RP11-91J19.3	8	400714	401268	426	0.159921	0.455445	0.157259	0.974829
	RP11-91J3.3	4	188334718	188336851	413	0.0539497	0.852107	0.1114	0.974829
	RP11-958N24.1	16	15005408	15029565	103	0.237931	0.348122	0.316569	0.974829
	RP11-981G7.2	8	10332075	10339484	716	0.14842	0.687418	0.35317	0.974829
	RP11-983P16.4	12	53408380	53447358	554	0.0864661	0.230264	0.156887	0.974829
	RP11-98D18.9	1	151763280	151766878	340	0.082554	0.747014	0.194624	0.974829
	RP13-578N3.3	4	144660128	144786225	259	0.0813207	0.646861	0.165371	0.974829
	RP13-582O9.5	8	144362331	144363860	384	0.359395	0.244169	0.215512	0.974829
	RP13-977J11.2	12	132671287	132674240	286	0.0741383	0.955668	0.150515	0.974829
	RP3-388E23.2	6	135622706	135628296	342	0.24477	0.33123	0.366663	0.974829
	RP3-402G11.25	22	50630153	50630831	398	0.752008	0.0973751	0.287455	0.974829
	RP3-402G11.26	22	50638505	50638976	396	0.817865	0.0955136	0.283675	0.974829
	RP3-449M8.9	14	74938633	74939063	373	0.214372	0.0889529	0.126416	0.974829
	RP3-522J7.6	22	50226264	50231434	513	0.619357	0.14449	0.341151	0.974829
	RP4-535B20.1	1	65532310	65533420	431	0.195551	0.268034	0.278389	0.974829
	RP4-564F22.5	20	37034658	37045444	482	0.055741	0.381734	0.140933	0.974829
	RP4-593H12.1	7	107220002	107220421	375	0.635838	0.0940823	0.254498	0.974829
	RP4-604G5.3	7	99590020	99590673	272	0.419993	0.242296	0.32392	0.974829
	RP4-605O3.4	12	50517147	50559203	312	0.273062	0.376469	0.337242	0.974829
	RP4-635E18.7	1	11128528	11133154	363	0.266765	0.218413	0.211873	0.974829
	RP4-669P10.16	22	42535623	42535938	363	0.362801	0.0348271	0.0925658	0.974829
	RP4-669P10.19	22	42528610	42529005	360	0.549242	0.0673627	0.192688	0.974829
	RP4-725G10.4	7	56243327	56244105	279	0.260336	0.305257	0.379327	0.974829
	RP4-758J24.5	1	54492356	54494172	482	0.195692	0.255036	0.228291	0.974829
	RP4-777O23.2	7	30565347	30573229	462	0.0928119	0.446702	0.170741	0.974829
	RP4-800G7.2	7	148982372	148994403	386	0.314884	0.264562	0.294128	0.974829
	RP5-1068E13.7	20	18775173	18776711	513	0.595058	0.0776934	0.122592	0.974829
	RP5-1142J19.1	7	157074230	157075380	443	0.40206	0.113318	0.220306	0.974829
	RP5-935K16.1	2	128601127	128603261	370	0.106098	0.11304	0.0679618	0.974829
	RP5-997D16.2	1	35316295	35317156	358	0.201809	0.167975	0.221167	0.974829
	RP9	7	33134409	33149002	352	0.475733	0.138306	0.250185	0.974829
	RP9P	7	32956427	32982788	330	0.103283	0.287422	0.192732	0.974829
	RPA1	17	1732996	1803376	441	0.289032	0.240066	0.215292	0.974829
	RPAP1	15	41809374	41836467	364	0.316928	0.179936	0.255533	0.974829
	RPH3AL	17	62293	236045	290	0.425077	0.173179	0.240473	0.974829
	RPL18A	19	17970685	17974962	427	0.977693	0.110439	0.276619	0.974829
	RPL23AP3	21	37388377	37388844	513	0.0950691	0.699677	0.249886	0.974829
	RPL23AP79	19	59086812	59111168	235	0.100513	0.43493	0.217683	0.974829
	RPL34-AS1	4	109459346	109541616	429	0.382079	0.0579306	0.0869197	0.974829
	RPL9	4	39455744	39460568	375	0.722673	0.12672	0.216696	0.974829
	RPN1	3	128338817	128399918	356	0.10756	0.1018	0.0778115	0.974829
	RPP25L	9	34610483	34612101	360	0.212715	0.312475	0.326021	0.974829
	RPS10P7	1	201487831	201499602	669	0.0433017	0.54169	0.103523	0.974829
	RPS28	19	8386384	8388198	361	0.192967	0.438734	0.280802	0.974829
	RPS5	19	58897767	58906173	317	0.0954134	0.646523	0.134775	0.974829
	RPS8	1	45240923	45244451	356	0.168788	0.684748	0.333584	0.974829
	RPS9	19	54704610	54752862	480	0.0762064	0.169903	0.0919521	0.974829
	RRBP1	20	17594323	17662940	620	0.40314	0.157754	0.298683	0.974829
	RRNAD1	1	156698592	156706752	450	0.153553	0.250354	0.209522	0.974829
	RSG1	1	16558195	16563657	318	0.0916193	0.592588	0.200349	0.974829
	RTEL1	20	62289163	62327606	432	0.840531	0.135016	0.341104	0.974829
	RUFY1	5	178977559	179037027	482	0.330882	0.233558	0.313619	0.974829
	RUNDC1	17	41132582	41145707	258	0.10071	0.674168	0.255487	0.974829
	RUSC1-AS1	1	155286654	155291478	264	0.827821	0.0962761	0.28776	0.974829
	RWDD3	1	95699711	95712781	498	0.648459	0.176362	0.251993	0.974829
	SAAL1	11	18091482	18127638	430	0.598558	0.0309278	0.0753351	0.974829
	SAMD12	8	119201698	119634234	553	0.0762183	0.642227	0.185403	0.974829
	SAMD9L	7	92759368	92777682	351	0.103536	0.890287	0.228793	0.974829
	SAP25	7	100169855	100171270	294	0.159985	0.700869	0.305142	0.974829
	SAT2	17	7529552	7531194	500	0.087598	0.705707	0.260959	0.974829
	SAV1	14	51098776	51135049	469	0.163914	0.488677	0.339706	0.974829
	SCD5	4	83550692	83720010	456	0.741936	0.0844668	0.240841	0.974829
	SCFD1	14	31091318	31205018	389	0.785689	0.139448	0.372906	0.974829
	SCN11A	3	38887260	38992052	470	0.37439	0.181779	0.210578	0.974829
	SCO2	22	50961997	50964035	320	0.593868	0.0981228	0.213025	0.974829
	SCRN2	17	45915080	45918699	386	0.6141	0.127094	0.325669	0.974829
	SCTR	2	120197419	120282070	410	0.169627	0.44877	0.30811	0.974829
	SDCCAG3	9	139296377	139305061	369	0.0688182	0.919615	0.191241	0.974829
	SDHAP1	3	195686619	195717187	292	0.193137	0.18194	0.161205	0.974829
	SDK1	7	3341080	4308632	574	0.171701	0.345962	0.252132	0.974829
	SDPR	2	192699028	192711981	393	0.814741	0.16385	0.362481	0.974829
	SDR39U1	14	24910880	24912110	559	0.398694	0.202145	0.260957	0.974829
	SEC23B	20	18488137	18542059	480	0.0607287	0.476626	0.128966	0.974829
	SEL1L3	4	25749055	25865382	471	0.135433	0.687258	0.25321	0.974829
	SELO	22	50639408	50656045	397	0.864245	0.103922	0.310374	0.974829
	SEMA4D	9	91975702	92113045	414	0.292084	0.201226	0.261279	0.974829
	SEMA4F	2	74881355	74909186	387	0.0868406	0.873167	0.244061	0.974829
	SENP7	3	101043049	101232085	370	0.517904	0.167858	0.239029	0.974829
	SEPHS1P1	7	64312775	64313732	269	0.481947	0.0757311	0.126101	0.974829
	44086	16	4827670	4838397	389	0.115094	0.58997	0.247314	0.974829
	SEPW1	19	48281829	48287941	504	0.324047	0.316135	0.360973	0.974829
	SERINC2	1	31882412	31907525	382	0.849668	0.123492	0.346071	0.974829
	SETD6	16	58549383	58553854	476	0.381848	0.145478	0.111554	0.974829
	SF3B3	16	70557691	70608820	159	0.0735538	0.972511	0.219771	0.974829
	SFI1	22	31884732	32014476	357	0.848138	0.0321738	0.120729	0.974829
	SFT2D1	6	166733216	166756079	727	0.0637584	0.808502	0.201637	0.974829
	SFTA1P	10	10826400	10836943	645	0.813498	0.190458	0.350156	0.974829
	SFXN3	10	102790991	102800998	416	0.144777	0.832063	0.360127	0.974829
	SGMS1	10	52065360	52384710	427	0.881468	0.08875	0.177781	0.974829
	SH3BGR	21	40817781	40887433	686	0.0247571	0.557371	0.0829681	0.974829
	SH3BGRL2	6	80341000	80413372	514	0.418648	0.205665	0.357797	0.974829
	SH3BP5-AS1	3	15295691	15306000	447	0.617066	0.0988508	0.191358	0.974829
	SH3TC2	5	148303202	148442726	518	0.768593	0.0265812	0.0997224	0.974829
	SHMT1	17	18231187	18266856	264	0.15681	0.47802	0.230035	0.974829
	SIGLEC12	19	51994611	52005043	629	0.125129	0.378773	0.224195	0.974829
	SIGLEC14	19	52145806	52150054	595	0.113241	0.43157	0.170277	0.974829
	SIRPB1	20	1544167	1600707	626	0.170614	0.539937	0.236542	0.974829
	SKINTL	1	48561764	48648100	492	0.103525	0.803177	0.239903	0.974829
	SLC15A5	12	16341419	16430619	390	0.119433	0.845904	0.326637	0.974829
	SLC16A7	12	59989848	60176395	353	0.253155	0.174971	0.201499	0.974829
	SLC16A8	22	38474141	38480100	358	0.446046	0.159455	0.190718	0.974829
	SLC1A7	1	53552855	53608289	488	0.172495	0.481944	0.193764	0.974829
	SLC22A16	6	110745890	110797844	389	0.996578	0.0379957	0.143319	0.974829
	SLC22A17	14	23815515	23822121	462	0.15965	0.700112	0.343018	0.974829
	SLC22A3	6	160769300	160876014	542	0.0697389	0.094539	0.0784632	0.974829
	SLC25A26	3	66119285	66438540	385	0.0820371	0.93573	0.250718	0.974829
	SLC25A27	6	46620678	46645930	515	0.286118	0.0646075	0.142443	0.974829
	SLC25A30	13	45967451	45986073	459	0.0354346	0.201867	0.0680329	0.974829
	SLC25A41	19	6426048	6433790	412	0.203549	0.169264	0.103179	0.974829
	SLC25A44	1	156163880	156182587	375	0.124359	0.410934	0.217269	0.974829
	SLC26A5	7	102993177	103083658	421	0.176428	0.442844	0.300588	0.974829
	SLC27A6	5	128181273	128369335	450	0.0707682	0.78983	0.169255	0.974829
	SLC35E1	19	16660642	16683193	389	0.670893	0.0458646	0.151736	0.974829
	SLC35E1P1	13	21181407	21182270	515	0.0661489	0.536525	0.186342	0.974829
	SLC35G1	10	95653730	95715819	476	0.131067	0.377153	0.255727	0.974829
	SLC39A10	2	196440701	196602426	337	0.255777	0.229982	0.321051	0.974829
	SLC44A5	1	75667816	76076801	422	0.942085	0.0767814	0.253359	0.974829
	SLC5A11	16	24857162	24922949	398	0.579038	0.0438574	0.140632	0.974829
	SLC5A4	22	32614465	32651328	579	0.748731	0.0644961	0.173868	0.974829
	SLFN12L	17	33800708	33864880	406	0.576663	0.173577	0.353997	0.974829
	SLU7	5	159828648	159848718	468	0.159755	0.587581	0.32772	0.974829
	SMARCE1	17	38781214	38804760	397	0.052859	0.90321	0.184236	0.974829
	SMDT1	22	42475695	42480288	343	0.748456	0.053536	0.179815	0.974829
	SMG5	1	156219015	156252620	394	0.0986801	0.38885	0.18965	0.974829
	SMIM2-AS1	13	44716682	44722166	490	0.256297	0.281535	0.228276	0.974829
	SMTNL1	11	57308979	57318108	378	0.222549	0.714554	0.353256	0.974829
	SMYD4	17	1682779	1733928	437	0.85879	0.12182	0.344824	0.974829
	SNAI1	20	48599536	48605423	465	0.69954	0.154079	0.313984	0.974829
	SNCA	4	90645250	90759411	380	0.0729579	0.246653	0.0776876	0.974829
	SNHG9	16	2014960	2015510	449	0.384864	0.24767	0.320348	0.974829
	SNORA31	13	45910449	45910582	440	0.253094	0.120215	0.177365	0.974829
	SNORA71C	20	37058313	37058446	479	0.412043	0.145196	0.288846	0.974829
	SNUPN	15	75890424	75918810	223	0.0865067	0.543716	0.171387	0.974829
	SNX11	17	46180719	46200436	446	0.0738528	0.531643	0.125926	0.974829
	SNX19	11	130745331	130786404	642	0.586699	0.140348	0.32762	0.974829
	SNX27	1	151584876	151671567	335	0.0852905	0.706045	0.237637	0.974829
	SNX31	8	101585116	101675643	454	0.0505317	0.746337	0.164885	0.974829
	SNX33	15	75941048	75954642	231	0.0635517	0.689049	0.170901	0.974829
	SPARCL1	4	88394487	88452213	494	0.219437	0.551306	0.362292	0.974829
	SPATA1	1	84972339	85031877	538	0.639166	0.12634	0.300372	0.974829
	SPATA5L1	15	45694529	45713617	339	0.838196	0.0393627	0.141622	0.974829
	SPATA6L	9	4553386	4666674	686	0.0693038	0.784046	0.179663	0.974829
	SPC24	19	11247988	11266484	381	0.167044	0.165873	0.151322	0.974829
	SPCS3	4	177241115	177253396	497	0.716887	0.0918595	0.240859	0.974829
	SPDL1	5	169010638	169031782	630	0.0874516	0.551652	0.213849	0.974829
	SPPL2A	15	50999506	51058005	400	0.148744	0.220824	0.114787	0.974829
	SPPL3	12	121200313	121342174	461	0.730913	0.0658818	0.160133	0.974829
	SPTA1	1	158580496	158656488	464	0.121868	0.193586	0.159279	0.974829
	SPTSSA	14	34901995	34931562	453	0.0875665	0.150244	0.0954442	0.974829
	SRD5A3	4	56212276	56239263	402	0.898385	0.0921226	0.279146	0.974829
	SRGAP1	12	64238073	64541319	302	0.35119	0.185367	0.298412	0.974829
	SRP14	15	40327940	40331389	449	0.0598328	0.360688	0.122569	0.974829
	SRP14-AS1	15	40331512	40359491	449	0.0408968	0.387812	0.0870994	0.974829
	SRP72	4	57333081	57369273	440	0.821582	0.0216274	0.0828549	0.974829
	SRR	17	2207066	2228554	409	0.160307	0.193295	0.0941531	0.974829
	SSBP4	19	18529674	18545197	387	0.307448	0.267068	0.340686	0.974829
	SSR4P1	21	46491648	46494080	603	0.0889844	0.651227	0.257675	0.974829
	ST8SIA2	15	92937058	93011958	689	0.177846	0.121906	0.16177	0.974829
	STAG3L2	7	74112305	74306731	100	0.230623	0.134478	0.201719	0.974829
	STAG3L4	7	66770974	66786513	368	0.591214	0.0713098	0.204434	0.974829
	STAG3L5P	7	99934035	99947781	305	0.179958	0.660187	0.328109	0.974829
	STEAP3	2	119981384	120023228	499	0.339525	0.0935908	0.120257	0.974829
	STK17A	7	43622357	43666385	434	0.159516	0.894071	0.343628	0.974829
	STK19	6	31938943	31949228	222	0.0987701	0.926193	0.297353	0.974829
	STK31	7	23749786	23872132	441	0.380403	0.153409	0.223684	0.974829
	STK32C	10	134020996	134145351	463	0.926773	0.0890346	0.269932	0.974829
	STON1-GTF2A1L	2	48807724	49003620	506	0.0319229	0.248644	0.0689425	0.974829
	STRADB	2	202252725	202345569	353	0.0645154	0.675726	0.152282	0.974829
	STRN4	19	47222764	47250251	339	0.033715	0.903239	0.118876	0.974829
	STX10	19	13254872	13261197	357	0.0933957	0.78094	0.273331	0.974829
	STX18-AS1	4	4543858	4712665	517	0.533915	0.144704	0.331992	0.974829
	STX1B	16	31000577	31021949	231	0.0438058	0.225144	0.0927984	0.974829
	STX8	17	9153788	9479908	561	0.264083	0.164283	0.209936	0.974829
	STXBP4	17	53046147	53241646	500	0.0812669	0.649515	0.171488	0.974829
	STXBP5-AS1	6	147163037	147525560	431	0.314094	0.435573	0.353892	0.974829
	STYXL1	7	75625656	75677322	320	0.245646	0.369945	0.356202	0.974829
	SUCLA2-AS1	13	48575525	48576688	373	0.128071	0.594603	0.210752	0.974829
	SUOX	12	56390964	56400425	295	0.15106	0.712876	0.377947	0.974829
	SUPT5H	19	39926796	39967310	440	0.131676	0.446415	0.264073	0.974829
	SURF1	9	136218610	136223552	603	0.192425	0.0879527	0.140533	0.974829
	SURF6	9	136197552	136203235	603	0.15537	0.0620055	0.0998846	0.974829
	SUZ12	17	30264037	30328064	309	0.0797439	0.749528	0.166467	0.974829
	SV2A	1	149874870	149889434	136	0.782316	0.091379	0.265691	0.974829
	SV2B	15	91643180	91844539	508	0.371395	0.271659	0.296322	0.974829
	SVIP	11	22835345	22851845	437	0.0693579	0.220745	0.0706653	0.974829
	SYCE3	22	50989541	51001334	303	0.953961	0.0810037	0.258739	0.974829
	SYMPK	19	46318668	46366548	401	0.426043	0.068634	0.127527	0.974829
	SYNRG	17	35874900	35969544	307	0.476324	0.120789	0.24724	0.974829
	TACC2	10	123748709	124014060	619	0.22804	0.583842	0.3148	0.974829
	TACSTD2	1	59041099	59043166	540	0.221213	0.0846468	0.149947	0.974829
	TADA2A	17	35766965	35839835	358	0.451519	0.164821	0.319708	0.974829
	TAF1C	16	84211525	84220669	967	0.829013	0.12424	0.324868	0.974829
	TAF2	8	120743015	120845103	460	0.0645107	0.664336	0.197487	0.974829
	TAGLN2P1	8	107709655	107710241	474	0.891358	0.0675369	0.219009	0.974829
	TATDN3	1	212965170	212989968	416	0.0549904	0.956518	0.144236	0.974829
	TBCD	17	80709940	80900724	357	0.662297	0.0797796	0.236345	0.974829
	TBKBP1	17	45771447	45789416	411	0.30637	0.217768	0.178336	0.974829
	TCAM1P	17	61926652	61941739	329	0.215511	0.186053	0.253615	0.974829
	TCN2	22	31003071	31023265	436	0.635651	0.17389	0.377248	0.974829
	TCP1	6	160199530	160210781	560	0.0762888	0.320534	0.145644	0.974829
	TCP10L	21	33948862	33959683	471	0.1017	0.47381	0.223408	0.974829
	TCTEX1D2	3	196018090	196045170	370	0.165234	0.441537	0.195526	0.974829
	TDRD5	1	179560748	179660407	475	0.420994	0.0830336	0.132486	0.974829
	TDRD6	6	46655612	46671937	523	0.881125	0.0399786	0.14468	0.974829
	TDRKH	1	151742583	151763892	339	0.114655	0.77233	0.273167	0.974829
	TEPP	16	58010339	58021475	546	0.874856	0.170266	0.33075	0.974829
	TEX264	3	51705191	51738339	237	0.797146	0.105969	0.285315	0.974829
	TEX41	2	145425534	145940216	281	0.167926	0.496973	0.363317	0.974829
	TFG	3	100428205	100467810	443	0.166865	0.643773	0.358994	0.974829
	TFR2	7	100218039	100240344	290	0.898423	0.130007	0.294457	0.974829
	TGM2	20	36756863	36794980	472	0.426889	0.115581	0.238931	0.974829
	THA1P	17	76244574	76250497	503	0.359815	0.0430116	0.111513	0.974829
	THAP9-AS1	4	83814162	83822113	469	0.316826	0.101099	0.14332	0.974829
	TICAM1	19	4815944	4831716	428	0.0540969	0.628403	0.172508	0.974829
	TIMM44	19	7991649	8008805	438	0.146231	0.900533	0.353816	0.974829
	TIPARP-AS1	3	156389651	156392130	435	0.48554	0.0334162	0.0797428	0.974829
	TIPIN	15	66628544	66679084	520	0.212718	0.457642	0.330644	0.974829
	TLR6	4	38825336	38845412	518	0.0439971	0.912175	0.133838	0.974829
	TM6SF2	19	19375175	19384200	359	0.293453	0.236758	0.330837	0.974829
	TMA16	4	164415594	164441691	395	0.436559	0.113859	0.257496	0.974829
	TMBIM1	2	219138915	219157309	434	0.750117	0.118233	0.247733	0.974829
	TMBIM4	12	66529626	66563852	498	0.55837	0.17249	0.338596	0.974829
	TMED10P2	3	128256863	128257474	361	0.0370866	0.291628	0.0881851	0.974829
	TMEM129	4	1717679	1723085	271	0.164027	0.164862	0.13998	0.974829
	TMEM132A	11	60691935	60704555	408	0.353728	0.0473326	0.0983206	0.974829
	TMEM144	4	159124772	159176563	303	0.323616	0.236874	0.328596	0.974829
	TMEM161B-AS1	5	87564888	87732502	274	0.374222	0.191798	0.31298	0.974829
	TMEM165	4	56262124	56319564	395	0.360626	0.104266	0.216984	0.974829
	TMEM184B	22	38615298	38669040	353	0.525178	0.0633353	0.143899	0.974829
	TMEM199	17	26684604	26690705	271	0.057072	0.371501	0.101449	0.974829
	TMEM216	11	61159159	61166335	374	0.0982379	0.995247	0.303345	0.974829
	TMEM217	6	37179956	37225413	603	0.180724	0.537256	0.261858	0.974829
	TMEM221	19	17546318	17559376	435	0.168936	0.576334	0.374251	0.974829
	TMEM236	10	18041218	18089855	379	0.447729	0.215066	0.260188	0.974829
	TMEM254-AS1	10	81806616	81838668	346	0.11309	0.803584	0.236145	0.974829
	TMEM50B	21	34804792	34852318	459	0.0400425	0.562225	0.0748278	0.974829
	TMEM81	1	205052258	205053645	610	0.394073	0.159166	0.262301	0.974829
	TMEM97	17	26646121	26655351	268	0.179087	0.257519	0.193407	0.974829
	TMEM98	17	31254928	31272124	530	0.77844	0.162267	0.371161	0.974829
	TMEM99	17	38975414	38992522	423	0.158182	0.732159	0.28195	0.974829
	TMF1	3	69068978	69101484	453	0.787852	0.0849203	0.257993	0.974829
	TMPO-AS1	12	98906751	98910029	443	0.0766301	0.596552	0.175539	0.974829
	TMTC4	13	101256181	101327347	558	0.499629	0.143087	0.194562	0.974829
	TNFAIP8L3	15	51348795	51397473	433	0.566415	0.0804376	0.208387	0.974829
	TNFRSF8	1	12123434	12204264	449	0.284834	0.372451	0.356916	0.974829
	TOLLIP-AS1	11	1330999	1331937	401	0.871256	0.056298	0.152636	0.974829
	TOMM34	20	43570771	43589127	415	0.370847	0.206459	0.32975	0.974829
	TOP3B	22	22311397	22337213	415	0.719959	0.240181	0.364458	0.974829
	TP73-AS1	1	3652766	3663900	464	0.265637	0.229671	0.200888	0.974829
	TPM3P9	19	53945049	53947923	489	0.149345	0.970568	0.311945	0.974829
	TPSB2	16	1277272	1280214	455	0.319421	0.0748885	0.146862	0.974829
	TPSD1	16	1306060	1308532	448	0.88723	0.0421404	0.143744	0.974829
	TPST1	7	65670186	65885530	218	0.0460572	0.356264	0.10051	0.974829
	TRABD	22	50624344	50638027	398	0.236837	0.143281	0.153867	0.974829
	TRAF1	9	123664671	123691451	348	0.0894608	0.239134	0.112595	0.974829
	TRAF3	14	103243813	103377837	339	0.143869	0.372443	0.173475	0.974829
	TRANK1	3	36868311	36986548	392	0.630133	0.122242	0.251962	0.974829
	TRAPPC12	2	3383446	3488865	573	0.180652	0.341372	0.319446	0.974829
	TRAPPC12-AS1	2	3485013	3486180	566	0.507103	0.162252	0.360273	0.974829
	TRAPPC4	11	118889401	118896164	386	0.179772	0.507572	0.314117	0.974829
	TRGC2	7	38279181	38289173	649	0.129034	0.955645	0.296866	0.974829
	TRIAP1	12	120881764	120884215	391	0.099125	0.31013	0.136873	0.974829
	TRIM13	13	50570024	50592587	407	0.585832	0.156584	0.370236	0.974829
	TRIM4	7	99488036	99517223	270	0.685152	0.130166	0.245966	0.974829
	TRIM45	1	117653682	117665209	451	0.135835	0.707123	0.361553	0.974829
	TRIM65	17	73876416	73893084	390	0.0753959	0.965722	0.230265	0.974829
	TRIM7	5	180620924	180632293	211	0.135184	0.242639	0.113577	0.974829
	TRIOBP	22	38093011	38172563	460	0.116538	0.356928	0.0952189	0.974829
	TSC22D4	7	100060982	100076902	306	0.189773	0.657601	0.351694	0.974829
	TSFM	12	58176372	58201854	355	0.0559206	0.55607	0.142669	0.974829
	TSGA10	2	99613724	99771417	298	0.65719	0.118834	0.318718	0.974829
	TSLP	5	110405760	110413722	375	0.0733923	0.47455	0.193193	0.974829
	TSPAN10	17	79604197	79615779	319	0.6638	0.0932528	0.265028	0.974829
	TSPY26P	20	30774280	30778330	317	0.374304	0.262739	0.290594	0.974829
	TTC12	11	113185251	113254266	527	0.29345	0.298805	0.258779	0.974829
	TTC28-AS1	22	28315364	28404569	525	0.54591	0.15911	0.223509	0.974829
	TTC3	21	38445526	38575413	435	0.20991	0.0427369	0.0871883	0.974829
	TTC37	5	94799599	94890711	415	0.174836	0.357928	0.263354	0.974829
	TTI1	20	36611409	36661870	482	0.463916	0.0752103	0.186412	0.974829
	TUBBP5	9	141044565	141071821	192	0.363826	0.367348	0.29828	0.974829
	TUBG2	17	40811323	40819024	260	0.605447	0.141105	0.286325	0.974829
	TXNDC5	6	7881656	7911047	616	0.46127	0.0509325	0.134758	0.974829
	TXNRD2	22	19863040	19921049	523	0.424269	0.0604867	0.141283	0.974829
	TYMP	22	50964181	50968485	318	0.832721	0.106235	0.273959	0.974829
	TYW1	7	66460160	66704501	257	0.891632	0.0868602	0.250301	0.974829
	U2AF1	21	44513066	44527697	512	0.792572	0.198787	0.367462	0.974829
	U2SURP	3	142720402	142779567	514	0.33409	0.245024	0.2976	0.974829
	UBA52	19	18682540	18688360	372	0.803175	0.125995	0.290433	0.974829
	UBAP1	9	34179003	34252378	320	0.055055	0.819171	0.188629	0.974829
	UBE2F	2	238875469	238951236	499	0.14724	0.114538	0.0977977	0.974829
	UBE2V1P1	20	3342527	3342971	436	0.710062	0.0892059	0.174317	0.974829
	UBE3B	12	109915350	109974507	428	0.0334514	0.666296	0.0706954	0.974829
	UBN1	16	4896666	4932361	407	0.0581126	0.95065	0.191069	0.974829
	UBQLN1	9	86274878	86323118	525	0.258155	0.238189	0.236756	0.974829
	UBTD2	5	171636644	171711075	523	0.0370003	0.356768	0.0806214	0.974829
	UBXN8	8	30589764	30624522	369	0.146541	0.759802	0.364399	0.974829
	UGGT1	2	128848774	128953251	383	0.0218948	0.577458	0.0735186	0.974829
	UPK3B	7	76139745	76648340	187	0.61628	0.148872	0.281522	0.974829
	URAD	13	28551851	28562791	503	0.0938928	0.493411	0.175931	0.974829
	URAHP	16	90106169	90114181	258	0.117943	0.658691	0.311631	0.974829
	URB1	21	33683329	33765335	487	0.231642	0.197662	0.206077	0.974829
	UROD	1	45477819	45481247	322	0.170444	0.309497	0.199478	0.974829
	USP30	12	109460894	109525831	421	0.295183	0.197567	0.25166	0.974829
	USP32P2	17	18414576	18426609	293	0.119198	0.71762	0.313904	0.974829
	USP37	2	219318019	219433084	364	0.0517096	0.940127	0.166183	0.974829
	USP48	1	22004791	22110099	494	0.397657	0.0816837	0.167386	0.974829
	UTP11L	1	38474930	38490496	464	0.0967586	0.149738	0.109668	0.974829
	VANGL1	1	116184574	116240845	531	0.115134	0.787545	0.2641	0.974829
	VEPH1	3	156977531	157251408	420	0.990738	0.0428375	0.143491	0.974829
	VKORC1	16	31102163	31107301	241	0.935203	0.0170257	0.0692092	0.974829
	VN1R20P	3	13968310	13969275	530	0.113873	0.296876	0.188256	0.974829
	VPS28	8	145649000	145653931	184	0.100908	0.635804	0.269149	0.974829
	VPS37B	12	123350045	123380991	311	0.801886	0.0867973	0.173227	0.974829
	VPS53	17	411908	624957	403	0.122491	0.240323	0.167902	0.974829
	VPS8	3	184529931	184770402	428	0.188435	0.424282	0.293658	0.974829
	VSIG10L	19	51834790	51845378	655	0.255981	0.369562	0.316191	0.974829
	VSIG8	1	159824106	159832447	511	0.11556	0.170943	0.0874563	0.974829
	VTI1B	14	68113792	68141548	362	0.789846	0.144257	0.370301	0.974829
	VWDE	7	12370511	12443567	617	0.367573	0.0683146	0.145831	0.974829
	WAC-AS1	10	28811581	28821421	583	0.215812	0.339848	0.340458	0.974829
	WASF1	6	110421022	110501207	454	0.811689	0.11794	0.315827	0.974829
	WDPCP	2	63348518	64054977	316	0.116979	0.696742	0.31992	0.974829
	WDR27	6	169857307	170102159	499	0.139144	0.548065	0.322107	0.974829
	WDR6	3	49044588	49053236	263	0.844367	0.0898346	0.277763	0.974829
	WDR75	2	190306159	190340291	308	0.23428	0.164091	0.239248	0.974829
	WDR92	2	68350068	68384692	529	0.514299	0.140528	0.200977	0.974829
	WEE2	7	141408153	141431071	459	0.191247	0.69735	0.319056	0.974829
	WFDC3	20	44376583	44420571	530	0.238974	0.105913	0.168907	0.974829
	WIPF2	17	38375556	38440388	297	0.230011	0.0925574	0.144592	0.974829
	WRAP73	1	3547331	3569325	463	0.198515	0.32777	0.209658	0.974829
	WTAP	6	160146617	160177351	535	0.718762	0.146014	0.317892	0.974829
	XRCC3	14	104163946	104181841	347	0.171116	0.761191	0.3819	0.974829
	XRCC6BP1	12	58335324	58351052	415	0.165657	0.306145	0.252276	0.974829
	XXyac-YX65C7_A.2	6	169613349	169639660	620	0.621427	0.0820526	0.217929	0.974829
	XXYLT1	3	194789008	194991896	376	0.317953	0.477199	0.379601	0.974829
	XYLB	3	38388251	38462839	438	0.621506	0.109505	0.20005	0.974829
	YTHDF3-AS1	8	64080284	64081001	393	0.28775	0.214703	0.262981	0.974829
	ZBTB11-AS1	3	101395274	101398061	342	0.209569	0.797565	0.376197	0.974829
	ZBTB38	3	141043055	141168634	407	0.789861	0.1345	0.371562	0.974829
	ZC3H3	8	144519825	144623623	360	0.773021	0.0923915	0.253518	0.974829
	ZDHHC7	16	85007787	85045141	655	0.106579	0.654733	0.29051	0.974829
	ZFP1	16	75182390	75206134	422	0.262286	0.365988	0.247312	0.974829
	ZFYVE19	15	41099284	41106767	290	0.276078	0.0412887	0.0960441	0.974829
	ZKSCAN2	16	25247322	25269252	433	0.309527	0.322187	0.259492	0.974829
	ZMIZ1-AS1	10	80703085	80827652	568	0.646609	0.0759968	0.185876	0.974829
	ZNF114	19	48675575	48790865	513	0.977762	0.136005	0.285981	0.974829
	ZNF117	7	64432154	64451186	257	0.215257	0.382384	0.338988	0.974829
	ZNF132	19	58944181	58951589	302	0.14647	0.639736	0.364248	0.974829
	ZNF135	19	58570607	58597677	451	0.0422722	0.79332	0.126556	0.974829
	ZNF142	2	219502639	219524378	371	0.0421931	0.865463	0.115652	0.974829
	ZNF143	11	9482069	9550071	398	0.163638	0.124446	0.144654	0.974829
	ZNF175	19	52074551	52092991	605	0.164402	0.364535	0.265011	0.974829
	ZNF181	19	35225060	35233777	427	0.280226	0.287931	0.324691	0.974829
	ZNF215	11	6947635	7005863	651	0.470818	0.200281	0.331861	0.974829
	ZNF260	19	37001597	37019562	315	0.418521	0.0540337	0.0945635	0.974829
	ZNF273	7	64330550	64391344	264	0.126912	0.235534	0.156678	0.974829
	ZNF28	19	53300662	53324922	484	0.246275	0.235712	0.170463	0.974829
	ZNF30	19	35417807	35436074	463	0.470608	0.09699	0.168994	0.974829
	ZNF302	19	35168552	35177302	414	0.308416	0.24002	0.289598	0.974829
	ZNF317	19	9251056	9274100	418	0.939646	0.0270438	0.0856394	0.974829
	ZNF322	6	26636518	26659980	441	0.297247	0.316211	0.293128	0.974829
	ZNF354A	5	178138593	178157703	591	0.191401	0.691616	0.348527	0.974829
	ZNF385C	17	40177660	40215075	319	0.195281	0.500891	0.382849	0.974829
	ZNF391	6	27342394	27371683	399	0.952329	0.0871604	0.240498	0.974829
	ZNF394	7	99090863	99097947	315	0.136103	0.157797	0.11382	0.974829
	ZNF468	19	53341261	53360902	469	0.0791554	0.387715	0.150679	0.974829
	ZNF507	19	32836500	32878573	415	0.141626	0.781021	0.371348	0.974829
	ZNF519	18	14057456	14132489	279	0.440318	0.162847	0.276876	0.974829
	ZNF528	19	52901102	52921657	464	0.85425	0.120525	0.352141	0.974829
	ZNF534	19	52932440	52955568	463	0.604195	0.114133	0.293406	0.974829
	ZNF544	19	58739960	58788815	369	0.0769666	0.724046	0.231195	0.974829
	ZNF561	19	9715356	9732075	362	0.0721904	0.521417	0.197007	0.974829
	ZNF577	19	52359055	52391233	619	0.544971	0.0426247	0.124952	0.974829
	ZNF578	19	52956829	53015407	456	0.197231	0.178004	0.21404	0.974829
	ZNF586	19	58281023	58331098	485	0.0836692	0.897674	0.224409	0.974829
	ZNF593	1	26496362	26498551	443	0.61274	0.0214576	0.0772915	0.974829
	ZNF713	7	55955205	56009918	321	0.205408	0.493972	0.349603	0.974829
	ZNF720	16	31724550	31806190	207	0.314468	0.100877	0.180486	0.974829
	ZNF774	15	90895477	90909324	401	0.620821	0.0609226	0.108193	0.974829
	ZNF792	19	35447258	35454953	466	0.42833	0.0772294	0.152602	0.974829
	ZNF83	19	53097313	53193749	463	0.101268	0.534561	0.179928	0.974829
	ZNF837	19	58878985	58892427	318	0.0646452	0.7342	0.19929	0.974829
	ZNF839	14	102783714	102808955	345	0.145794	0.295605	0.254386	0.974829
	ZNF841	19	52567719	52599018	562	0.0213485	0.796886	0.0806582	0.974829
	ZNF843	16	31445569	31454346	277	0.712263	0.0197778	0.0725397	0.974829
	ZNF880	19	52873170	52889048	486	0.108446	0.261351	0.187675	0.974829
	ZNRD1-AS1	6	29968788	30029030	41	0.244042	0.661783	0.328935	0.974829
	ZP3	7	76054224	76071388	223	0.607762	0.174189	0.286052	0.974829
	ZSCAN18	19	58595205	58629794	438	0.177327	0.561707	0.323845	0.974829
	ZSCAN21	7	99647390	99662661	271	0.737119	0.158884	0.29423	0.974829
	ZSCAN31	6	28292470	28324048	384	0.176395	0.342866	0.294988	0.974829
	ZSWIM5	1	45482071	45771881	289	0.0612733	0.715039	0.187185	0.974829
	ZWINT	10	58116989	58121036	363	0.0551535	0.803622	0.115798	0.974829
	AAGAB	15	67493371	67547074	482	0.630427	0.216539	0.3854	0.975114
	AC000123.4	7	126990182	126991577	485	0.141126	0.906846	0.396885	0.975114
	AC002467.7	7	107383262	107384881	436	0.310575	0.290002	0.399443	0.975114
	AC004980.10	7	76279718	76280214	155	0.244518	0.46644	0.416151	0.975114
	AC009404.2	2	118591513	118599234	469	0.272027	0.719251	0.413763	0.975114
	AC099048.1	3	30030355	30031951	496	0.202238	0.993485	0.396208	0.975114
	ACBD4	17	43209967	43221548	285	0.879868	0.157916	0.41446	0.975114
	ADAM19	5	156822607	157002783	528	0.306618	0.363502	0.40557	0.975114
	AGAP8	10	51224681	51252947	187	0.149704	0.918904	0.41634	0.975114
	ANGEL2	1	213165524	213189168	420	0.662307	0.242009	0.389396	0.975114
	ANO7P1	1	16542404	16554522	324	0.240898	0.459259	0.399185	0.975114
	AP000351.10	22	24373117	24374043	381	0.426427	0.319395	0.417124	0.975114
	ARHGEF19	1	16524712	16539104	335	0.2671	0.476571	0.407069	0.975114
	ASAP1	8	131064353	131455906	542	0.528788	0.275463	0.409108	0.975114
	ATPAF2	17	17880723	17942523	351	0.524227	0.223146	0.399851	0.975114
	B3GNT8	19	41931456	41934635	365	0.214799	0.793379	0.38568	0.975114
	BEND3P3	10	81444250	81444739	328	0.977832	0.209312	0.394268	0.975114
	C17orf75	17	30651681	30677042	255	0.613327	0.200438	0.409738	0.975114
	C1orf174	1	3805689	3816849	452	0.378115	0.367826	0.401157	0.975114
	CAND1	12	67663061	67713731	532	0.408015	0.235068	0.406998	0.975114
	CAPN12	19	39224343	39260544	407	0.233679	0.432479	0.393325	0.975114
	CARD6	5	40841286	40860275	443	0.389626	0.357759	0.394938	0.975114
	CCDC102A	16	57546090	57570511	554	0.385013	0.259877	0.415956	0.975114
	CCDC127	5	196986	218330	290	0.252895	0.526326	0.408591	0.975114
	CCDC57	17	80059336	80170706	309	0.509391	0.219548	0.416471	0.975114
	CCT6B	17	33254878	33288528	494	0.671433	0.168142	0.406544	0.975114
	CD22	19	35810164	35838258	493	0.25075	0.402191	0.411248	0.975114
	CEBPD	8	48649471	48651648	138	0.149861	0.984875	0.414589	0.975114
	CEBPG	19	33864236	33873592	471	0.286165	0.416494	0.398475	0.975114
	CEP170	1	243287730	243418650	285	0.494267	0.409632	0.397282	0.975114
	CHMP3	2	86730554	86790602	336	0.23963	0.589967	0.404635	0.975114
	COQ7	16	19079014	19091417	382	0.313991	0.322633	0.410654	0.975114
	COX4I2	20	30225691	30232809	283	0.298486	0.356737	0.386482	0.975114
	CRLF3	17	29096406	29151794	277	0.248305	0.355331	0.398296	0.975114
	CTC-471C19.1	5	6019142	6022396	611	0.193218	0.828144	0.417117	0.975114
	CTD-2651B20.1	15	45444862	45445415	307	0.191646	0.668887	0.410399	0.975114
	CTSF	11	66330934	66336312	256	0.437073	0.254235	0.41745	0.975114
	CYP2J2	1	60358980	60392462	410	0.329224	0.366808	0.393958	0.975114
	DRAM2	1	111659955	111682838	579	0.206131	0.848063	0.413618	0.975114
	EFCAB13	17	45400656	45518678	346	0.864498	0.222809	0.394764	0.975114
	FAM107A	3	58549844	58613337	385	0.607478	0.171891	0.403446	0.975114
	FAM179A	2	29179477	29284239	596	0.2168	0.447455	0.395858	0.975114
	FAM47E	4	77135193	77204933	484	0.313382	0.465086	0.415657	0.975114
	FAM85A	8	12051976	12053789	202	0.147245	0.927784	0.411126	0.975114
	FLG	1	152274651	152297679	402	0.201923	0.489245	0.392127	0.975114
	FLYWCH1	16	2961938	3001209	340	0.140322	0.890965	0.3871	0.975114
	FMOD	1	203309756	203320617	501	0.17168	0.638621	0.389233	0.975114
	FOXD4	9	116237	118417	388	0.840165	0.218309	0.40252	0.975114
	FRRS1L	9	111892573	111929571	597	0.930761	0.158552	0.402202	0.975114
	FYCO1	3	45959396	46037307	449	0.487072	0.451253	0.408163	0.975114
	GDI2	10	5807186	5884095	701	0.226291	0.785452	0.395649	0.975114
	GOLGA6L4	15	84904525	84914120	250	0.519608	0.271322	0.386381	0.975114
	GRIP2	3	14530858	14583588	633	0.767331	0.169685	0.386784	0.975114
	GUCY1B2	13	51568647	51654998	493	0.215932	0.541511	0.394179	0.975114
	GUSBP2	6	26839263	26924333	396	0.44252	0.281968	0.398108	0.975114
	GXYLT2	3	72937224	73026077	445	0.394218	0.301366	0.393108	0.975114
	HBS1L	6	135281516	135424194	357	0.261504	0.419852	0.415657	0.975114
	IFIT5	10	91174343	91180758	563	0.201512	0.538161	0.405893	0.975114
	IGSF22	11	18726965	18747777	483	0.22621	0.414026	0.407533	0.975114
	IL1RN	2	113864791	113891593	471	0.339249	0.589331	0.403254	0.975114
	INTS8	8	95825539	95888717	442	0.665703	0.167726	0.398405	0.975114
	IRF3	19	50162826	50168822	326	0.1757	0.721068	0.416038	0.975114
	IRF5	7	128577666	128590089	337	0.160919	0.857805	0.413439	0.975114
	ITGB3	17	45331212	45389182	330	0.222968	0.52109	0.412747	0.975114
	KB-1507C5.2	8	103877139	103990104	517	0.43146	0.428441	0.394752	0.975114
	KCNC1	11	17756359	17804219	538	0.587821	0.235315	0.409967	0.975114
	KIAA1045	9	34957484	34982541	347	0.496431	0.250762	0.399309	0.975114
	KIAA1586	6	56911347	56920023	250	0.526992	0.262903	0.385097	0.975114
	KXD1	19	18668572	18680197	375	0.698178	0.173847	0.391879	0.975114
	L1TD1	1	62660503	62678000	456	0.469202	0.213811	0.400717	0.975114
	LINC00240	6	26924771	26991703	395	0.315658	0.405334	0.40026	0.975114
	LINC00271	6	135818489	136037193	367	0.471944	0.203463	0.401397	0.975114
[truncated: 2,896 more rows]

## Sheet: SupplTable3.3
	Supplementary Table 3.3 Interactions between genes and lifetime alcohol consumption (by 10 grams per day)
						P-values
	Gene Name	Chromosome	Start	End	# of SNPs	Fixed effect	Random Effect	Adaptive Weighted	FDR-Corrected Adaptive Weighted
	AC004840.9	7	2477398	2487485	446	0.00529287	0.172607	0.00332114	0.872297
	AC005154.7	7	30562759	30564151	462	0.00771022	0.726126	0.0218445	0.872297
	AC005154.8	7	30583669	30584047	462	0.0110056	0.562195	0.0333378	0.872297
	AC005682.5	7	22893797	22901021	491	0.0133028	0.838254	0.0436879	0.872297
	AC012309.5	19	37742814	37756437	280	0.263192	0.0145898	0.0329617	0.872297
	AC017076.5	2	6968645	6980595	612	0.1422	0.0286708	0.018582	0.872297
	AC024937.4	3	195723609	195725104	294	0.672351	0.00189298	0.00774046	0.872297
	AC024937.6	3	195664114	195665610	283	0.989674	0.00100375	0.00467607	0.872297
	AC069213.1	3	195341818	195347104	298	0.0396729	0.0264377	0.00930966	0.872297
	AC069513.4	3	195382436	195384798	284	0.0127501	0.0177428	0.00745628	0.872297
	AC074138.3	19	37176342	37178351	285	0.11467	0.0975319	0.0411221	0.872297
	AC104135.2	2	75146682	75151973	457	0.00532687	0.845759	0.0239912	0.872297
	AC104135.3	2	75145275	75165545	457	0.00460526	0.817255	0.0207251	0.872297
	AC104135.4	2	75167385	75169797	461	0.00776592	0.745866	0.0332892	0.872297
	ADAM11	17	42836399	42859214	386	0.173163	0.0183289	0.0379071	0.872297
	ADAM19	5	156822607	157002783	528	0.258742	0.0139139	0.0351072	0.872297
	AIM2	1	159032274	159116886	472	0.0110831	0.512003	0.0125767	0.872297
	AK9	6	109814059	110012420	440	0.710803	0.00712839	0.0282569	0.872297
	AMY2B	1	104104379	104122156	160	0.0253953	0.0544688	0.0139041	0.872297
	ANKRD54	22	38226862	38244874	405	0.309505	0.00927836	0.0269474	0.872297
	ANXA3	4	79472673	79531575	465	0.155334	0.0204923	0.0268582	0.872297
	AP001469.9	21	47671616	47674047	474	0.00982499	0.345637	0.0301525	0.872297
	ARHGEF34P	7	143969538	143991256	331	0.00379647	0.369792	0.0118311	0.872297
	ARL6IP4	12	123466197	123467456	321	0.65323	0.00504309	0.0214389	0.872297
	ARMC1	8	66514694	66546442	363	0.0272758	0.0281072	0.0131084	0.872297
	ARMC2	6	109169619	109295186	388	0.652999	0.00372369	0.0149239	0.872297
	BET1L	11	167784	207428	280	0.0668066	0.0564488	0.01676	0.872297
	BHMT	5	78407602	78428108	415	0.0152071	0.60664	0.0325442	0.872297
	BMP2K	4	79697496	79831991	412	0.181846	0.0230119	0.0388025	0.872297
	C15orf57	15	40820882	40857256	334	0.0322456	0.0322425	0.0227724	0.872297
	C17orf97	17	260118	273510	299	0.000362078	0.249801	0.00131261	0.872297
	C2orf82	2	233733724	233743395	461	0.455069	0.00653019	0.0204178	0.872297
	C5	9	123714616	123812554	376	0.770297	0.00760485	0.0318622	0.872297
	C5orf45	5	179261436	179285887	440	0.0139291	0.338796	0.0175966	0.872297
	C6orf201	6	4079456	4131185	637	0.712464	0.00180001	0.00835498	0.872297
	CCDC178	18	30517366	31021065	319	0.0773299	0.00780981	0.00882607	0.872297
	CCT6P3	7	64498738	64535091	247	0.865324	0.00469041	0.0144133	0.872297
	CDK2AP1	12	123746031	123756881	348	0.00634258	0.547969	0.0232158	0.872297
	CENPK	5	64813593	64858998	418	0.903146	0.0102808	0.0257269	0.872297
	CENPP	9	95087919	95382815	411	0.645546	0.00815429	0.0213296	0.872297
	CHKB	22	51017378	51039884	285	0.233467	0.0397374	0.0406797	0.872297
	CHST8	19	34112861	34264414	475	0.544429	0.00604255	0.0230334	0.872297
	CLDN10	13	96085858	96230456	665	0.00245486	0.0591422	0.0026227	0.872297
	COL26A1	7	101006101	101202304	347	0.875848	0.00781933	0.0344801	0.872297
	CSGALNACT2	10	43633934	43680756	391	0.0333061	0.0143878	0.0108822	0.872297
	CTB-63M22.1	5	165809310	165809604	419	0.159088	0.0168724	0.0263536	0.872297
	CTC-534A2.2	5	64921836	64926718	391	0.730146	0.00411464	0.010199	0.872297
	CTD-2017D11.1	19	24216247	24249711	169	0.00493902	0.370936	0.0151341	0.872297
	CTD-2162K18.4	19	37264055	37267980	274	0.0579302	0.134345	0.02289	0.872297
	CTD-2192J16.11	19	12663411	12664458	286	0.0317958	0.121857	0.032196	0.872297
	CTD-2192J16.21	19	12640582	12643787	281	0.424785	0.0107547	0.0258649	0.872297
	CTD-2554C21.3	19	38320191	38322797	327	0.0133697	0.903993	0.0333012	0.872297
	CTD-2651B20.1	15	45444862	45445415	307	0.94554	0.0102329	0.0435843	0.872297
	CTD-2651B20.3	15	45543884	45571449	335	0.00575477	0.445193	0.0127147	0.872297
	CTD-2651B20.4	15	45622407	45624832	325	0.0199504	0.301279	0.0215875	0.872297
	CTD-3025N20.3	8	66504085	66504707	360	0.195134	0.0116512	0.0161153	0.872297
	CTD-3064H18.4	19	38036372	38040073	280	0.763866	0.0124153	0.029682	0.872297
	CTD-3080P12.3	5	1173256	1178720	367	0.997285	0.00994399	0.0399854	0.872297
	CYB5D2	17	4046462	4090605	472	0.0585944	0.0846046	0.0360954	0.872297
	CYP7A1	8	59402737	59412795	525	0.0117644	0.762307	0.0243708	0.872297
	DDHD2	8	38082736	38120351	282	0.0503541	0.0562622	0.040235	0.872297
	DHPS	19	12786647	12792716	299	0.040318	0.0147371	0.0100232	0.872297
	DISP2	15	40650436	40663257	399	0.0298907	0.0161872	0.0115755	0.872297
	DNASE1L3	3	58177984	58200424	447	0.00213725	0.758272	0.00760697	0.872297
	DOCK9-AS2	13	99740073	99740879	547	0.0122326	0.0470243	0.013751	0.872297
	DPYSL4	10	134000404	134019280	464	0.0578967	0.0561766	0.0372104	0.872297
	EDEM3	1	184659365	184724047	426	0.994865	0.00686704	0.0243359	0.872297
	ERV3-1	7	64451415	64467121	255	0.721049	0.00501733	0.0140512	0.872297
	EXT2	11	44117099	44266979	556	0.0853713	0.043255	0.0394763	0.872297
	FAM228B	2	24299396	24392509	318	0.0311507	0.0981742	0.0397536	0.872297
	FBXO25	8	356428	421225	405	0.00340628	0.0176378	0.00277309	0.872297
	FBXO7	22	32870663	32894818	646	0.827626	0.00926105	0.0391193	0.872297
	FIS1	7	100882739	100895597	380	0.0191153	0.039821	0.00610894	0.872297
	FOLH1	11	49168187	49230222	168	0.00915487	0.0812592	0.0122117	0.872297
	FTCDNL1	2	200625267	200715896	319	0.0164366	0.601493	0.0368133	0.872297
	FTOP1	2	43024365	43025852	453	0.0410577	0.0699198	0.0394877	0.872297
	FUT10	8	33228342	33330903	252	0.530617	0.00286684	0.00677247	0.872297
	GALM	2	38893052	38968379	372	0.415004	0.0147701	0.0427154	0.872297
	GCAT	22	38203912	38213183	417	0.823437	0.01006	0.04168	0.872297
	GCDH	19	13001840	13025021	323	0.236929	0.00620694	0.014069	0.872297
	GNRHR	4	68605046	68620078	390	0.00387567	0.718467	0.0166112	0.872297
	GPD1L	3	32147181	32210205	522	0.00579825	0.647814	0.0191303	0.872297
	GTF2H5	6	158589384	158620376	530	0.513251	0.0179572	0.0419149	0.872297
	HAVCR1P1	19	24345172	24346227	140	0.0131804	0.308168	0.0330369	0.872297
	HDHD2	18	44634434	44676891	515	0.0306438	0.0698243	0.0233967	0.872297
	HERC2P10	15	31107474	31136356	284	0.639192	0.0100498	0.04032	0.872297
	HIBCH	2	191054461	191184771	341	0.00720404	0.345863	0.0175327	0.872297
	HNRNPCP7	7	63961203	63962107	329	0.00945146	0.653408	0.0254445	0.872297
	HRCT1	9	35906189	35907138	437	0.0853813	0.126644	0.0337758	0.872297
	HTATIP2	11	20385231	20405329	707	0.0349275	0.142185	0.0316328	0.872297
	HTATSF1P2	6	3023376	3024006	678	0.146518	0.0230134	0.03916	0.872297
	IFFO1	12	6647541	6665239	336	0.818093	0.0192612	0.0378721	0.872297
	IGHEP2	9	5113549	5114804	536	0.0565062	0.056086	0.0359497	0.872297
	IMPDH1	7	128032331	128050306	388	0.0188801	0.23483	0.0309641	0.872297
	INTS4L1	7	64601603	64694600	214	0.878816	0.00816382	0.028607	0.872297
	ITGB3BP	1	63906441	63994857	491	0.692066	0.0126706	0.0384784	0.872297
	IVD	15	40697686	40728146	386	0.209884	0.0162549	0.0400596	0.872297
	KIN	10	7792925	7829990	617	0.00569486	0.536934	0.0203231	0.872297
	KLHL2	4	166128770	166244308	482	0.00943846	0.457418	0.0340713	0.872297
	KLHL36	16	84682131	84695920	876	0.00596894	0.270595	0.0148763	0.872297
	KNSTRN	15	40674922	40686447	393	0.658401	0.00427327	0.0178864	0.872297
	KPNA4	3	160212783	160283234	353	0.0217671	0.769444	0.0432087	0.872297
	KRI1	19	10664095	10676713	363	0.00484908	0.203089	0.0102897	0.872297
	LIG4	13	108859787	108870716	598	0.491186	0.00460173	0.0123804	0.872297
	LINC00487	2	6868309	6910442	621	0.352919	0.0304652	0.0229817	0.872297
	LINC00969	3	195384933	195456422	284	0.916027	0.003337	0.0143652	0.872297
	LINC01013	6	132453055	132490514	512	0.131001	0.0082527	0.00910962	0.872297
	LRR1	14	50065883	50081390	388	0.0676221	0.0322078	0.0181519	0.872297
	MAGEF1	3	184428156	184429836	450	0.00866976	0.281619	0.0169653	0.872297
	MAPK8IP2	22	51039114	51052409	285	0.0148616	0.108539	0.00866528	0.872297
	MED4	13	48627459	48669267	364	0.0139582	0.145207	0.0166954	0.872297
	METTL10	10	126436718	126480439	563	0.813741	0.0105488	0.0312495	0.872297
	METTL21A	2	208445355	208490652	403	0.014899	0.355167	0.0359149	0.872297
	MGC10955	2	74361599	74362521	359	0.0189174	0.232434	0.0402225	0.872297
	MIR570	3	195426272	195426368	286	0.66846	0.00461354	0.0179078	0.872297
	MPHOSPH6	16	82181403	82203831	754	0.111536	0.0297745	0.0416301	0.872297
	MRPL14	6	44081194	44095194	558	0.138293	0.0165394	0.0231254	0.872297
	MSH2	2	47630108	47789450	479	0.0194606	0.459415	0.0408233	0.872297
	MST1L	1	17081405	17096732	291	0.00923512	0.987396	0.0399852	0.872297
	MTERFD2	2	242011584	242041747	449	0.00274108	0.553236	0.0107933	0.872297
	MTFR1	8	66556969	66683496	366	0.137419	0.00188806	0.00476164	0.872297
	MTO1	6	74171301	74218959	378	0.888559	0.00229393	0.00716009	0.872297
	MTRF1L	6	153308497	153323820	547	0.0442521	0.0752415	0.0375958	0.872297
	MUC20	3	195447753	195467994	299	0.326507	0.00561501	0.0147754	0.872297
	NCOA1	2	24714783	24993571	319	0.669383	0.00641832	0.0270686	0.872297
	NEK2	1	211836114	211848960	420	0.0307956	0.329699	0.0378151	0.872297
	NETO1	18	70409549	70535381	579	0.00358756	0.814928	0.0155963	0.872297
	NFYA	6	41040684	41067715	570	0.0115596	0.331137	0.0332171	0.872297
	NME7	1	169101961	169337205	595	0.0400142	0.214769	0.027943	0.872297
	NTPCR	1	233086351	233119180	594	0.0119151	0.563287	0.0420193	0.872297
	NUP160	11	47799639	47870107	261	0.0019933	0.109387	0.00362443	0.872297
	OIP5-AS1	15	41576188	41601465	269	0.657021	0.0059653	0.0219658	0.872297
	OOEP	6	74078278	74104470	381	0.0315716	0.0129794	0.000816234	0.872297
	OPN3	1	241753416	241840678	571	0.0545486	0.204422	0.0402483	0.872297
	OR2A1-AS1	7	143950626	144053274	339	0.0250175	0.0371131	0.0194569	0.872297
	OR2A7	7	143955700	143956815	311	0.194585	0.0148476	0.0307115	0.872297
	OR51E1	11	4664650	4676718	710	0.00820625	0.314594	0.0237815	0.872297
	P2RX4	12	121647660	121671909	417	0.00846092	0.398217	0.02067	0.872297
	PGK1P2	19	12670385	12671919	286	0.038122	0.122637	0.0417859	0.872297
	PIAS2	18	44388353	44500111	520	0.0102611	0.93668	0.0395971	0.872297
	PLA2G15	16	68279207	68294961	310	0.38313	0.0106713	0.0303464	0.872297
	PPIP5K2	5	102455856	102548500	320	0.839383	0.00950924	0.0321844	0.872297
	PPWD1	5	64859066	64883376	418	0.795799	0.00751098	0.0184615	0.872297
	PRMT7	16	68344877	68392230	317	0.124532	0.0258246	0.0428498	0.872297
	PSMC5	17	61905032	61909379	328	0.0143691	0.142817	0.0277022	0.872297
	PSMG4	6	3231637	3303607	615	0.81371	0.00698631	0.0133011	0.872297
	PXK	3	58318607	58411748	456	0.0633394	0.101994	0.0411965	0.872297
	RALGAPA1	14	36007558	36278510	402	0.0973657	0.0784111	0.0397663	0.872297
	RGMB-AS1	5	98105330	98109173	342	0.00486991	0.69438	0.0162485	0.872297
	RMI2	16	11343506	11445619	515	0.0159572	0.236402	0.0326408	0.872297
	RNF24	20	3907956	3996229	611	0.00635114	0.355705	0.0218021	0.872297
	RNH1	11	494512	507300	418	0.00877329	0.451039	0.03186	0.872297
	RP1-122P22.2	20	19738792	19790319	731	0.494629	0.011697	0.0336404	0.872297
	RP1-90J20.11	6	3025025	3027659	675	0.0965711	0.0224011	0.0253613	0.872297
	RP11-109N23.6	14	73427303	73428701	451	0.00848968	0.483028	0.0311865	0.872297
	RP11-141C7.3	3	195377017	195378343	284	0.00354492	0.0930514	0.0051891	0.872297
	RP11-141C7.4	3	195366861	195367331	284	0.210062	0.00848984	0.0129225	0.872297
	RP11-190A12.8	1	159836744	159837475	512	0.00623376	0.0455337	0.00786297	0.872297
	RP11-282O18.3	12	123736577	123745527	349	0.0123552	0.558549	0.0412256	0.872297
	RP11-307E17.8	9	97094758	97123230	417	0.00283393	0.721126	0.0122146	0.872297
	RP11-324O2.3	10	114165977	114169252	455	0.0117711	0.0782152	0.0176644	0.872297
	RP11-326C3.12	11	327171	330122	331	0.126769	0.080344	0.0431793	0.872297
	RP11-351D16.3	10	43632272	43633782	391	0.167634	0.00619428	0.0124037	0.872297
	RP11-421F16.3	12	27124519	27132515	515	0.0079054	0.594356	0.021037	0.872297
	RP11-43A14.1	8	675188	675877	593	0.268121	0.00172121	0.00507424	0.872297
	RP11-453E17.3	4	68584714	68589980	399	0.00694189	0.634848	0.0266791	0.872297
	RP11-460N20.4	7	64535401	64539158	233	0.777749	0.00749868	0.0233219	0.872297
	RP11-460N20.5	7	64544481	64560610	233	0.597574	0.0100639	0.0268769	0.872297
	RP11-463O9.1	16	86559063	86559858	933	0.830311	0.0105805	0.0435271	0.872297
	RP11-463O9.9	16	86553989	86557503	931	0.717326	0.0102843	0.0408667	0.872297
	RP11-505P4.7	6	74233521	74280319	391	0.0558531	0.0381977	0.0273369	0.872297
	RP11-529H20.6	14	92511119	92516990	508	0.199468	0.0522887	0.0420334	0.872297
	RP11-536G4.2	12	96189123	96252617	587	0.0045537	0.245517	0.0122634	0.872297
	RP11-561N12.7	7	64139332	64147771	280	0.0100244	0.528227	0.0253365	0.872297
	RP11-620J15.2	12	58263618	58290265	403	0.922565	0.00877802	0.0377254	0.872297
	RP11-690I21.1	2	232654191	232654597	350	0.0551703	0.0616016	0.0386766	0.872297
	RP11-722E23.2	8	33218361	33218933	241	0.460943	0.00339318	0.00820474	0.872297
	RP11-75C9.1	9	8858130	8862255	761	0.713911	0.00463489	0.016471	0.872297
	RP11-797H7.3	7	64323377	64324748	265	0.0860646	0.0292573	0.0216688	0.872297
	RP11-797H7.5	7	64348905	64350478	257	0.362652	0.00892223	0.0136539	0.872297
	RP11-89K11.1	15	102277302	102285913	373	0.00795659	0.883222	0.0311195	0.872297
	RP11-91J19.3	8	400714	401268	426	0.0124192	0.00558208	0.0026824	0.872297
	RP11-91J19.4	8	424455	427966	429	0.0272968	0.0151668	0.0116329	0.872297
	RP11-950C14.7	14	75594048	75603633	417	0.0202967	0.435836	0.0340172	0.872297
	RP3-402G11.26	22	50638505	50638976	396	0.000183514	0.336151	0.00076453	0.872297
	RP4-545C24.1	7	143891951	143977640	297	0.722458	0.0035069	0.0149508	0.872297
	RP5-855D21.1	8	184347	184887	323	0.00303058	0.0188718	0.00203904	0.872297
	RP5-855D21.2	8	187045	187669	324	0.386685	0.000436336	0.00169219	0.872297
	RPA3-AS1	7	7681135	8007651	727	0.00847443	0.708748	0.0346031	0.872297
	RPL36AL	14	50085237	50087403	384	0.00232623	0.118443	0.00504715	0.872297
	RRN3	16	15153879	15188174	102	0.0103478	0.812394	0.0388769	0.872297
	SATB1	3	18386879	18487080	368	0.0618543	0.0235132	0.0211328	0.872297
	SDAD1P1	8	26236775	26240413	666	0.00129999	0.785076	0.00617346	0.872297
	SDHAP1	3	195686619	195717187	292	0.430909	0.00210996	0.00768262	0.872297
	SEMA4D	9	91975702	92113045	414	0.978472	0.00281462	0.0135128	0.872297
	SF3A3	1	38422647	38456593	470	0.0094848	0.959793	0.0401828	0.872297
	SFI1	22	31884732	32014476	357	0.891211	0.00284445	0.0134231	0.872297
	SFT2D1	6	166733216	166756079	727	0.0992663	0.0336555	0.0436874	0.872297
	SIRT3	11	215458	236431	294	0.00092181	0.146576	0.00119327	0.872297
	SLC16A8	22	38474141	38480100	358	0.559891	0.00881244	0.0311313	0.872297
	SLC25A26	3	66119285	66438540	385	0.00160405	0.772445	0.00716452	0.872297
	SLC25A44	1	156163880	156182587	375	0.00122476	0.821186	0.00584323	0.872297
	SLC2A1-AS1	1	43424720	43449029	434	0.0284533	0.0250138	0.00952929	0.872297
	SLC44A5	1	75667816	76076801	422	0.0101648	0.323322	0.0307656	0.872297
	SLC51A	3	195938358	195970049	355	0.104215	0.00021199	0.000226256	0.872297
	SP140L	2	231191899	231268447	482	0.0398228	0.0484588	0.0334699	0.872297
	SPATA5L1	15	45694529	45713617	339	0.00792401	0.428178	0.027429	0.872297
	STK32C	10	134020996	134145351	463	0.0379634	0.186258	0.0427634	0.872297
	SUCO	1	172501489	172580971	393	0.00124269	0.471639	0.00354619	0.872297
	TAPBPL	12	6560885	6575683	423	0.470738	0.0189374	0.0347298	0.872297
	TBC1D7	6	13266774	13328815	514	0.00471054	0.698183	0.0175331	0.872297
	TBCE	1	235530675	235612283	324	0.938648	0.0053647	0.0237828	0.872297
	TCTEX1D2	3	196018090	196045170	370	0.100452	0.00228263	0.0044827	0.872297
	TIE1	1	43766664	43788779	461	0.00684292	0.167983	0.0166654	0.872297
	TM4SF19-AS1	3	196045201	196052441	370	0.0970463	0.00350136	0.006988	0.872297
	TMEM246	9	104235453	104295819	573	0.105474	0.020896	0.0198497	0.872297
	TNPO2	19	12810008	12834825	296	0.506763	0.0192188	0.0428956	0.872297
	TRAPPC13	5	64920543	64961754	392	0.132238	0.00948193	0.011701	0.872297
	TRERF1	6	42192669	42419789	397	0.0158931	0.330727	0.0291357	0.872297
	TRIM23	5	64885507	64921802	391	0.803082	0.00230829	0.00580544	0.872297
	TRIOBP	22	38093011	38172563	460	0.706683	0.00541852	0.0233911	0.872297
	UBXN2B	8	59323823	59364060	516	0.0079024	0.478791	0.0209869	0.872297
	UBXN8	8	30589764	30624522	369	0.0103574	0.626732	0.0380854	0.872297
	VAMP1	12	6571489	6580153	406	0.52222	0.0221797	0.0437299	0.872297
	VEPH1	3	156977531	157251408	420	0.0342382	0.483077	0.0421935	0.872297
	VIP	6	153071933	153080900	584	0.0388075	0.0221139	0.0193489	0.872297
	VWDE	7	12370511	12443567	617	0.633522	0.00537687	0.0161113	0.872297
	WASF1	6	110421022	110501207	454	0.0488161	0.0475619	0.0213367	0.872297
	XRCC6BP1	12	58335324	58351052	415	0.696375	0.00327457	0.014497	0.872297
	ZFP30	19	38121910	38183238	290	0.528399	0.0121813	0.0277348	0.872297
	ZFYVE19	15	41099284	41106767	290	0.0808925	0.00908457	0.0118461	0.872297
	ZNF273	7	64330550	64391344	264	0.269325	0.00976375	0.018861	0.872297
	ZNF320	19	53367043	53400946	458	0.691499	0.0116946	0.0350838	0.872297
	ZNF33B	10	43069633	43134016	316	0.00550757	0.0356215	0.00640215	0.872297
	ZNF37BP	10	43008958	43048270	267	0.146843	0.0172872	0.0148904	0.872297
	ZNF415	19	53611132	53636330	490	0.0122471	0.142337	0.0202101	0.872297
	ZNF429	19	21688366	21739072	299	0.220826	0.0370503	0.0247197	0.872297
	ZNF443	19	12540521	12551926	280	0.0391317	0.0495249	0.0272675	0.872297
	ZNF490	19	12688775	12750912	293	0.0101078	0.178973	0.016494	0.872297
	ZNF571	19	38045684	38085673	288	0.596466	0.00877856	0.0207357	0.872297
	ZNF600	19	53267448	53290044	474	0.200018	0.0248453	0.0247246	0.872297
	ZNF709	19	12571998	12624668	282	0.0366307	0.0995646	0.0429502	0.872297
	ZNF781	19	38158652	38169674	294	0.0665671	0.0587442	0.0384208	0.872297
	ZNF793	19	37997949	38039664	273	0.63161	0.00595744	0.0153154	0.872297
	ZNF83	19	53097313	53193749	463	0.33706	0.0177685	0.0372109	0.872297
	ZNHIT1	7	100860955	100867471	380	0.0245908	0.046679	0.010677	0.872297
	ZWINT	10	58116989	58121036	363	0.00190791	0.0732243	0.00377138	0.872297
	RP11-647K16.1	2	191318818	191319247	342	0.0385158	0.106157	0.0442133	0.878384
	POC5	5	74969949	75013313	386	0.313285	0.0183436	0.0447742	0.885953
	AC004562.1	17	67957848	67979679	418	0.12231	0.0716789	0.0601011	0.886244
	AC006272.1	19	52343177	52346577	612	0.0158494	0.707346	0.0591624	0.886244
	AC008073.7	2	24388753	24397874	283	0.0218328	0.254408	0.0559163	0.886244
	AP000344.3	22	23775751	23777258	521	0.0298985	0.627387	0.0559053	0.886244
	ARSB	5	78073032	78281910	454	0.142867	0.0469149	0.0584488	0.886244
	B3GALNT2	1	235613238	235667781	324	0.0430709	0.14302	0.0519026	0.886244
	CD79B	17	62006100	62009714	332	0.0159401	0.655395	0.0608994	0.886244
	CDC25B	20	3767578	3786762	515	0.813473	0.0141618	0.058651	0.886244
	CEBPG	19	33864236	33873592	471	0.067187	0.217864	0.0600718	0.886244
	CEP290	12	88444131	88535993	292	0.0207772	0.474491	0.0574401	0.886244
	CHKB-AS1	22	51021455	51022306	294	0.158119	0.0542092	0.0541941	0.886244
	CHML	1	241792155	241799232	568	0.266389	0.0261015	0.0550075	0.886244
	CNOT8	5	154237113	154256353	446	0.351152	0.028994	0.0535629	0.886244
	COX11	17	53029263	53046125	500	0.144412	0.0721348	0.0565519	0.886244
	CRHR2	7	30692200	30728900	475	0.175203	0.0720496	0.0512219	0.886244
	CROCC	1	17066768	17299474	279	0.0117942	0.956726	0.0506304	0.886244
	CTA-228A9.3	22	38486134	38487566	355	0.660427	0.019281	0.0584094	0.886244
	CTA-384D8.36	22	50962854	50963209	321	0.392992	0.0210622	0.0590305	0.886244
	CTD-2006C1.2	19	12098432	12157090	315	0.138973	0.0535613	0.0482476	0.886244
	DBF4B	17	42785976	42829632	390	0.222438	0.0273842	0.0613373	0.886244
	DCAKD	17	43100708	43138473	326	0.0127494	0.59749	0.0478415	0.886244
	DDX17	22	38879453	38903665	368	0.046451	0.22067	0.0552731	0.886244
	DDX42	17	61851136	61896677	316	0.924234	0.0124352	0.051367	0.886244
	EML4	2	42396490	42559688	522	0.622816	0.0158545	0.0569723	0.886244
	FLRT3	20	14303634	14318262	415	0.0130577	0.633701	0.0458338	0.886244
	FTCD	21	47556176	47575481	498	0.0183627	0.602524	0.0472989	0.886244
	GEMIN4	17	647654	655899	394	0.439736	0.0189151	0.060907	0.886244
	HOXA2	7	27139885	27142430	414	0.0124221	0.969778	0.0486877	0.886244
	IFI27L2	14	94594118	94596590	751	0.0109568	0.815955	0.0457087	0.886244
	ITSN2	2	24425733	24583583	304	0.539788	0.0165609	0.0594984	0.886244
	LINC00839	10	42970991	42990784	243	0.141616	0.0344126	0.0608356	0.886244
	MAP3K3	17	61699775	61773261	277	0.424503	0.0168299	0.0546749	0.886244
	METTL21B	12	58165389	58176324	355	0.802366	0.0131243	0.0516629	0.886244
	MIS12	17	5389605	5394134	526	0.0184118	0.444786	0.0607469	0.886244
	MIS18BP1	14	45672393	45722743	248	0.0420816	0.132945	0.052233	0.886244
	MSTO2P	1	155715620	155719422	236	0.63819	0.0159499	0.0563152	0.886244
	NGEF	2	233743419	233877982	457	0.0829374	0.060209	0.0584347	0.886244
	NLRC4	2	32449522	32490923	309	0.0361672	0.228205	0.0474678	0.886244
	NPPA-AS1	1	11903761	11908136	479	0.0528644	0.249828	0.0602812	0.886244
	NQO2	6	2994165	3019996	683	0.57921	0.0149801	0.0520758	0.886244
	OR2A20P	7	143947138	143950050	305	0.0172217	0.332288	0.0519585	0.886244
	OR2A9P	7	143991573	143998027	331	0.933961	0.0149021	0.0610031	0.886244
	PAX6	11	31806340	31839509	382	0.0667537	0.100694	0.0605096	0.886244
	PHACTR1	6	12717893	13288645	501	0.926723	0.0133162	0.0541309	0.886244
	PLCB2	15	40576457	40600123	397	0.261869	0.0206638	0.0528857	0.886244
	PLGRKT	9	5357973	5437878	444	0.0438459	0.120795	0.0593444	0.886244
	PRKRIP1	7	102004319	102067123	252	0.012668	0.890572	0.0532195	0.886244
	PTDSS2	11	448268	491387	386	0.0200929	0.379717	0.049084	0.886244
	RFPL3S	22	32755893	32778039	648	0.306644	0.0158733	0.0451504	0.886244
	RNF216P1	7	5013619	5080306	355	0.795139	0.0183854	0.0475495	0.886244
	RP11-21L23.4	11	76470960	76479267	480	0.338476	0.0243967	0.0578005	0.886244
	RP11-34A14.3	10	100011780	100016332	525	0.0181771	0.352169	0.0521134	0.886244
	RP11-390E23.6	7	123389122	123391220	350	0.0343887	0.380136	0.0482731	0.886244
	RP11-398K22.12	6	73972938	74011124	390	0.537137	0.0187764	0.048748	0.886244
	RP11-420K14.6	19	21933586	21935994	293	0.645265	0.0299981	0.057553	0.886244
	RP11-43F13.1	5	1599035	1634120	577	0.218624	0.0501418	0.0567379	0.886244
	RP11-550I24.2	3	156893058	157098944	420	0.0252931	0.524267	0.048675	0.886244
	RP11-563N4.1	2	32390115	32390826	267	0.104033	0.175215	0.0601298	0.886244
	RP11-634H22.1	7	139043778	139044257	360	0.0933078	0.119001	0.0533159	0.886244
	RP11-686O6.2	2	203239655	203240327	335	0.148851	0.0456457	0.0544666	0.886244
	RP11-799M12.2	4	15565321	15565876	550	0.365143	0.0233358	0.0586878	0.886244
	RP11-831A10.1	11	119879313	119882867	495	0.381355	0.0348113	0.0535167	0.886244
	RP4-635A23.4	1	185249976	185250948	402	0.152889	0.0305918	0.051273	0.886244
	RP5-894A10.6	7	141362722	141363646	456	0.0156001	0.375835	0.0456745	0.886244
	RPL23AP3	21	37388377	37388844	513	0.0199451	0.389094	0.0612249	0.886244
	RPS6KL1	14	75372346	75390099	378	0.278404	0.0258564	0.0526811	0.886244
	SDHAP3	5	1568637	1594735	566	0.518905	0.0314986	0.061064	0.886244
	SEMA3E	7	82993222	83278326	514	0.012321	0.877764	0.0521008	0.886244
	SEPHS1P1	7	64312775	64313732	269	0.229297	0.0411415	0.0568859	0.886244
	SLC25A27	6	46620678	46645930	515	0.013389	0.949212	0.0460999	0.886244
	SLC25A39	17	42396993	42402238	340	0.17687	0.04752	0.0606155	0.886244
	SMPD2	6	109762560	109765122	387	0.766847	0.0129596	0.0510146	0.886244
	SNX18	5	53813589	53842415	598	0.0249063	0.350554	0.0567378	0.886244
	SPATA6L	9	4553386	4666674	686	0.0851978	0.0492336	0.053063	0.886244
	SPTSSA	14	34901995	34931562	453	0.0249425	0.580545	0.0582183	0.886244
	STXBP4	17	53046147	53241646	500	0.355304	0.0206391	0.0599354	0.886244
	SUDS3	12	118814185	118855840	445	0.540049	0.0204372	0.0556998	0.886244
	TCTN2	12	124155660	124192948	392	0.993758	0.0135794	0.0561935	0.886244
	TEX41	2	145425534	145940216	281	0.104572	0.0649765	0.0571761	0.886244
	TMEM199	17	26684604	26690705	271	0.0137315	0.660338	0.0522931	0.886244
	TSFM	12	58176372	58201854	355	0.864586	0.0129082	0.0515156	0.886244
	TSNAXIP1	16	67840668	67866051	231	0.563779	0.0158907	0.0548569	0.886244
	TUSC1	9	25676396	25678856	478	0.545584	0.0173796	0.0547583	0.886244
	VPS37B	12	123350045	123380991	311	0.908168	0.0106187	0.0461747	0.886244
	VSIG8	1	159824106	159832447	511	0.15714	0.0273746	0.0507006	0.886244
	WDR65	1	43638535	43720029	464	0.726411	0.0120203	0.0484737	0.886244
	WFS1	4	6271576	6304992	673	0.0448294	0.187219	0.0453238	0.886244
	ZNF391	6	27342394	27371683	399	0.0579049	0.26369	0.0610212	0.886244
	ZNF468	19	53341261	53360902	469	0.747582	0.0238903	0.0609702	0.886244
	ZNF841	19	52567719	52599018	562	0.0141968	0.700764	0.0556895	0.886244
	ZNF850	19	37205285	37263727	274	0.0750191	0.147619	0.0588652	0.886244
	ZNF93	19	20011722	20046384	300	0.043862	0.123	0.0613207	0.886244
	TAPT1-AS1	4	16228286	16321763	604	0.408971	0.0223737	0.06174	0.889453
	AC005154.6	7	30555925	30625588	468	0.0322007	0.371489	0.0657934	0.892767
	AC005682.6	7	22903493	22920969	482	0.0305847	0.656466	0.103433	0.892767
	AC008073.9	2	24422708	24424567	285	0.485107	0.0282996	0.0823912	0.892767
	AC009506.1	2	160471807	160473593	485	0.0468413	0.405981	0.104914	0.892767
	AC010492.2	19	54732911	54734088	492	0.079835	0.255392	0.0990349	0.892767
	AC012363.8	2	120969303	120970438	325	0.403361	0.0524987	0.108906	0.892767
	AC079776.2	2	130680435	130691890	289	0.961697	0.0317522	0.0888932	0.892767
	AC092295.7	19	37063972	37085610	306	0.125574	0.202181	0.0970972	0.892767
	AC094019.4	3	32192575	32193387	514	0.0307648	0.411559	0.0801349	0.892767
	AC096574.5	2	238521620	238535168	514	0.0332879	0.584015	0.104496	0.892767
	ADCK2	7	140372953	140394921	362	0.136964	0.11446	0.0900966	0.892767
	ADCY10P1	6	41068761	41108571	573	0.076881	0.15345	0.0770087	0.892767
	AFG3L1P	16	90038994	90067076	294	0.0309025	0.573865	0.0872716	0.892767
	AMIGO1	1	110046797	110052360	424	0.0293081	0.464886	0.0690509	0.892767
	ANO4	12	101111304	101522419	483	0.905527	0.0274734	0.098098	0.892767
	AP001627.1	21	44153704	44161868	650	0.0346386	0.675602	0.0934006	0.892767
	ARHGEF25	12	58003963	58013162	338	0.206665	0.0470973	0.0887573	0.892767
	ARHGEF35	7	143883176	143885488	296	0.0576642	0.186218	0.0792972	0.892767
	ARHGEF5	7	144052381	144077725	339	0.579239	0.0245161	0.0813495	0.892767
	ARSA	22	51061182	51066607	260	0.174979	0.0928604	0.0810463	0.892767
	ASB16	17	42247815	42256451	356	0.639792	0.0269072	0.0904495	0.892767
	ASB16-AS1	17	42253341	42264085	352	0.458796	0.0278233	0.0643821	0.892767
	ATHL1	11	289138	296107	317	0.823278	0.0294272	0.106398	0.892767
	ATP6V0A2	12	124196865	124246302	399	0.902328	0.0229503	0.0889937	0.892767
	AXDND1	1	179334855	179523870	477	0.0260197	0.586273	0.0873954	0.892767
	BRINP1	9	121915736	122131745	539	0.0545201	0.168739	0.0713884	0.892767
	C16orf86	16	67700719	67702661	235	0.5942	0.0325259	0.101259	0.892767
	C17orf72	17	62078444	62081664	314	0.047806	0.171537	0.086782	0.892767
	C19orf40	19	33463115	33469128	446	0.11723	0.209856	0.0787563	0.892767
	C5orf17	5	23951457	24178372	338	0.155202	0.206935	0.111264	0.892767
	C7orf55-LUC7L2	7	139025105	139108198	352	0.0855411	0.0911124	0.08451	0.892767
	C9orf37	9	140509813	140513358	345	0.209925	0.129887	0.103459	0.892767
	CANX	5	179125407	179157926	463	0.0358153	0.209872	0.0722109	0.892767
	CASQ1	1	160160285	160171676	515	0.330577	0.0374143	0.0662397	0.892767
	CAST	5	95860971	96115299	465	0.0214197	0.854504	0.0812451	0.892767
	CATSPER2	15	43920701	43959900	258	0.0304111	0.988533	0.0961331	0.892767
	CCDC158	4	77234155	77343021	520	0.0475754	0.379722	0.0780998	0.892767
	CCDC62	12	123258874	123312075	308	0.386436	0.0421867	0.111772	0.892767
	CCDC92	12	124403207	124457378	437	0.142366	0.150738	0.0933273	0.892767
	CCNYL2	10	42903616	42967688	244	0.175942	0.0438931	0.0815855	0.892767
	CD27-AS1	12	6548327	6560060	423	0.203446	0.0784419	0.0694647	0.892767
	CEP44	4	175206585	175254531	447	0.0442819	0.223518	0.0856452	0.892767
	CKMT2-AS1	5	80499903	80597379	464	0.026153	0.550831	0.0689396	0.892767
	CNOT6L	4	78634541	78740769	432	0.1769	0.0615121	0.0811111	0.892767
	COL24A1	1	86194916	86622626	485	0.043645	0.346397	0.0951769	0.892767
	CPSF2	14	92588281	92630755	526	0.0520586	0.440311	0.0922412	0.892767
	CPT1B	22	51007290	51017096	296	0.17446	0.0539571	0.0657953	0.892767
	CSPG4P11	15	84855504	84866136	253	0.461451	0.0303379	0.0950567	0.892767
	CTA-292E10.8	22	29210902	29211650	331	0.0604334	0.322894	0.10973	0.892767
	CTAGE8	7	143963794	143966381	320	0.0541834	0.233653	0.111294	0.892767
	CTB-12O2.1	5	151329132	151650009	530	0.996761	0.0267387	0.0694415	0.892767
	CTC-523E23.11	19	35340182	35351480	459	0.0408293	0.655562	0.105522	0.892767
	CTD-2012J19.1	5	1614951	1616449	573	0.989717	0.0317396	0.111939	0.892767
	CTD-2012J19.3	5	1594741	1611582	566	0.948887	0.0287113	0.102853	0.892767
	CTD-2054N24.2	15	100347228	100417353	540	0.0462734	0.668111	0.105401	0.892767
	CTD-2196P11.2	5	38682172	38685228	461	0.172359	0.0940578	0.07544	0.892767
	CTD-2256P15.4	5	10264709	10267258	606	0.0380492	0.830027	0.0983547	0.892767
	CTD-2666L21.2	19	12395152	12396000	272	0.22258	0.0801031	0.110841	0.892767
	CYBRD1	2	172378757	172414643	357	0.0473942	0.886821	0.10836	0.892767
	CYLD	16	50775961	50835846	434	0.0216314	0.978944	0.0796581	0.892767
	CYTH2	19	48972951	48983103	530	0.508995	0.0500161	0.106684	0.892767
	DCAF16	4	17802278	17812381	380	0.793591	0.025886	0.0883579	0.892767
	DCAF4	14	73393040	73426411	466	0.0562351	0.202032	0.0945649	0.892767
	DDX55	12	124086646	124104952	381	0.630052	0.022696	0.0773516	0.892767
	DDX56	7	44605016	44614650	365	0.657932	0.033588	0.0761951	0.892767
	DGCR6	22	18893541	18901751	454	0.0226419	0.420444	0.0712274	0.892767
	DPY30	2	32236955	32264881	262	0.837462	0.0219775	0.0842306	0.892767
	EIF2B2	14	75469614	75476292	414	0.114662	0.126081	0.103177	0.892767
	EIF3KP1	5	102368080	102368735	310	0.875171	0.027957	0.0909357	0.892767
	EIF5A	17	7210318	7215774	458	0.0182167	0.94456	0.0746184	0.892767
	ETFDH	4	159593408	159630285	273	0.423724	0.046511	0.0887347	0.892767
	EYA1	8	72109668	72274467	547	0.327833	0.040329	0.102523	0.892767
	FAM115A	7	143548468	143599291	230	0.0342207	0.348145	0.0670804	0.892767
	FAM195B	17	79780287	79791178	287	0.034583	0.919151	0.0759906	0.892767
	FAM228A	2	24397938	24423718	283	0.050108	0.279548	0.11109	0.892767
	FAM71F2	7	128312342	128326929	370	0.975135	0.0254098	0.101912	0.892767
	FAM86B2	8	12282913	12293915	187	0.0489608	0.262317	0.0928829	0.892767
	FASTKD1	2	170386259	170430385	433	0.0274534	0.390004	0.070286	0.892767
	FEZ2	2	36778570	36873230	611	0.740852	0.0230162	0.0722234	0.892767
	FGFBP2	4	15961866	15964859	574	0.0277047	0.432248	0.084254	0.892767
	FHL3	1	38462442	38471278	465	0.0281839	0.943035	0.103313	0.892767
	FTSJ3	17	61896793	61907372	330	0.422704	0.0237588	0.0713794	0.892767
	G6PC3	17	42148103	42153709	360	0.387809	0.0311832	0.0886342	0.892767
	GCSAML-AS1	1	247687981	247690054	471	0.0486753	0.320603	0.0796805	0.892767
	GEMIN5	5	154266976	154317769	421	0.987351	0.0308356	0.0738419	0.892767
	GOLGA8O	15	32737307	32747835	358	0.148318	0.246414	0.107565	0.892767
	GSTA1	6	52656462	52668708	562	0.458342	0.0316874	0.0827401	0.892767
	GVINP1	11	6734767	6767670	629	0.0432506	0.731155	0.106817	0.892767
	HDDC3	15	91474148	91475799	499	0.0284711	0.780368	0.103137	0.892767
	HNRNPA1L2	13	53191605	53217919	421	0.0660299	0.264468	0.0888081	0.892767
	HYAL3	3	50330476	50333204	329	0.0353773	0.390281	0.0843026	0.892767
	HYI	1	43918574	43919597	440	0.847757	0.0290082	0.10833	0.892767
	IARS	9	94972489	95056038	412	0.10187	0.175602	0.103647	0.892767
	IFIT5	10	91174343	91180758	563	0.0414591	0.49192	0.109823	0.892767
	IFITM5	11	298200	299526	319	0.897883	0.0301686	0.112678	0.892767
	IKZF5	10	124750322	124768333	588	0.0485539	0.160863	0.082972	0.892767
	ILF3-AS1	19	10762538	10764520	373	0.367559	0.0319313	0.0850635	0.892767
	INPP1	2	191208196	191236391	342	0.193286	0.078811	0.0936898	0.892767
	INPP5A	10	134351324	134596979	480	0.034297	0.353955	0.0954068	0.892767
	IQCB1	3	121488610	121553926	421	0.0268954	0.469274	0.0787346	0.892767
	IQCE	7	2598632	2654368	486	0.388432	0.0316247	0.0891246	0.892767
	IQGAP2	5	75699074	76003957	575	0.996649	0.0204724	0.0829137	0.892767
	KATNAL2	18	44497469	44627658	519	0.301368	0.070326	0.107081	0.892767
	KDELC2	11	108342832	108369159	322	0.554224	0.0414758	0.0966157	0.892767
	KIAA1586	6	56911347	56920023	250	0.0712789	0.142749	0.104927	0.892767
	KLHL24	3	183353356	183402265	475	0.354443	0.0416412	0.0629872	0.892767
	KLRG2	7	139137436	139168458	405	0.270245	0.0747142	0.105252	0.892767
	KREMEN1	22	29469066	29564321	390	0.25495	0.0530679	0.103919	0.892767
	KRT8P12	3	160283377	160287036	353	0.0589079	0.187558	0.089102	0.892767
	L3MBTL3	6	130334844	130462594	561	0.114974	0.0779939	0.0899846	0.892767
	LACTB	15	63413999	63434260	516	0.619936	0.0368048	0.113068	0.892767
	LIG3	17	33307513	33332083	491	0.915171	0.0391978	0.112617	0.892767
	LINC00467	1	211556145	211605878	430	0.0545415	0.821302	0.110719	0.892767
	LINC00865	10	91589267	91600618	498	0.0992935	0.103628	0.099569	0.892767
	LINC01006	7	156264890	156398458	474	0.0600025	0.107688	0.0712751	0.892767
	LRIT3	4	110769358	110793471	407	0.0377974	0.853538	0.0950566	0.892767
	LRPPRC	2	44113647	44223144	507	0.0244425	0.866063	0.0907737	0.892767
	LRRC36	16	67360701	67419106	238	0.0422181	0.614095	0.0906789	0.892767
	LRRK2	12	40590546	40763087	537	0.0338836	0.184931	0.0685755	0.892767
	LRWD1	7	102105376	102113564	245	0.0219263	0.798016	0.0751525	0.892767
	LSM12	17	42112003	42144987	360	0.34218	0.0437627	0.0634577	0.892767
	LTBR	12	6484391	6500729	464	0.985191	0.0367459	0.0839556	0.892767
	LURAP1	1	46669006	46686933	349	0.920771	0.0189422	0.074853	0.892767
	MAML1	5	179159851	179223253	442	0.0208858	0.519373	0.0683891	0.892767
	MAP2K4	17	11924141	12047147	455	0.96666	0.0415385	0.0955025	0.892767
	MAPK12	22	50687628	50700254	394	0.640085	0.0263721	0.0932004	0.892767
	MEOX1	17	41717756	41739322	347	0.138754	0.119955	0.10906	0.892767
	METTL18	1	169761670	169764107	560	0.587111	0.039243	0.106063	0.892767
	METTL2B	7	128116783	128146656	385	0.0569452	0.127862	0.0751725	0.892767
	MRI1	19	13875346	13884981	331	0.0240852	0.555902	0.0750826	0.892767
	MRPL41	9	140445651	140447007	337	0.1637	0.0604621	0.070899	0.892767
	MRPL51	12	6601150	6602521	384	0.149755	0.0717904	0.0682442	0.892767
	MRPS10	6	42174539	42185603	415	0.162096	0.0511906	0.0850922	0.892767
	MZT2A	2	132222473	132250316	166	0.0349431	0.968857	0.0953448	0.892767
	NDUFA6-AS1	22	42486960	42535286	351	0.0362479	0.45919	0.0928105	0.892767
	NDUFB2	7	140396621	140406446	361	0.650415	0.029478	0.101486	0.892767
	NINJ1	9	95883771	95896570	432	0.0365579	0.445655	0.0968579	0.892767
	NIPAL2	8	99202061	99306621	458	0.226245	0.192215	0.0904226	0.892767
	NIPAL4	5	156887087	156901725	522	0.612901	0.0263816	0.090102	0.892767
	NIPSNAP1	22	29950797	29977326	392	0.0409203	0.324689	0.0974517	0.892767
	NLRP2	19	55464498	55512510	482	0.225705	0.0540207	0.0741423	0.892767
	NLRP6	11	278365	285359	312	0.13287	0.0793783	0.105695	0.892767
	NMRK1	9	77675489	77703133	444	0.191967	0.0955702	0.102917	0.892767
	NMUR1	2	232387871	232395206	353	0.882913	0.0294592	0.106617	0.892767
	NSUN7	4	40751914	40812002	486	0.363066	0.0233185	0.0635868	0.892767
	NT5DC2	3	52558512	52569070	372	0.492017	0.0385229	0.0731989	0.892767
	NUDCD3	7	44418720	44530479	351	0.876711	0.0342835	0.0884089	0.892767
	OSCP1	1	36881428	36916086	377	0.0259719	0.993294	0.101028	0.892767
	PAPOLA	14	96968710	97033448	551	0.0432181	0.117836	0.0637221	0.892767
	PFN2	3	149682691	149768515	416	0.0920198	0.0999096	0.0884053	0.892767
	PFN4	2	24338241	24346347	305	0.0493231	0.158862	0.0837583	0.892767
	PICK1	22	38452318	38471708	368	0.245752	0.057261	0.0699684	0.892767
	PMS2P9	7	76669261	76673093	252	0.0471106	0.471566	0.110936	0.892767
	PPFIA1	11	70116806	70230509	419	0.396169	0.0331583	0.0776974	0.892767
	PPP6R2	22	50781733	50883428	369	0.523345	0.0225767	0.0678297	0.892767
	PRDM8	4	81105033	81125483	366	0.226509	0.10778	0.0920084	0.892767
	PRKD1	14	30045687	30661104	348	0.0363895	0.629859	0.0980424	0.892767
	PRPH2	6	42664340	42690312	365	0.551135	0.0442344	0.110976	0.892767
	PSD4	2	113914902	113966973	453	0.145655	0.0989867	0.11304	0.892767
	PSMD13	11	236546	252981	294	0.0817219	0.168132	0.0922421	0.892767
	PSPHP1	7	55832490	55840981	354	0.116617	0.116482	0.0622546	0.892767
	RALB	2	120997640	121052289	322	0.82125	0.0167483	0.0672681	0.892767
	RALGPS2	1	178745817	178889238	389	0.0264671	0.435728	0.0694913	0.892767
	RBPMS-AS1	8	30239635	30242917	354	0.114777	0.242139	0.0867822	0.892767
	RGL3	19	11495017	11530018	396	0.71731	0.0253736	0.0889748	0.892767
	RNF144A	2	7057523	7208417	597	0.550725	0.0440116	0.0952124	0.892767
	RP1-102E24.6	12	6586880	6589373	399	0.332715	0.0462387	0.0680948	0.892767
	RP1-257A7.5	6	13290250	13290722	520	0.141144	0.148272	0.101696	0.892767
	RP1-34L19.1	6	53071396	53073495	545	0.031385	0.255209	0.0684805	0.892767
	RP1-40E16.12	6	3068279	3069128	658	0.50773	0.0753725	0.110927	0.892767
	RP1-90J20.12	6	3020388	3022984	680	0.824732	0.0164412	0.0624182	0.892767
	RP11-1072C15.4	17	42751057	42753625	403	0.113155	0.0672878	0.0864956	0.892767
	RP11-109E12.1	2	132219394	132221188	171	0.0281574	0.995225	0.102374	0.892767
	RP11-119B16.2	20	3868886	3869485	558	0.244234	0.0531751	0.0924082	0.892767
	RP11-182J1.16	15	84841242	84850986	254	0.661254	0.0311129	0.110607	0.892767
	RP11-212P7.2	7	128164070	128171123	373	0.824811	0.0306894	0.104035	0.892767
	RP11-214N9.1	2	9696028	9696904	477	0.0321972	0.790334	0.0825051	0.892767
	RP11-255H23.2	19	23945746	24016116	238	0.0376447	0.162757	0.0644225	0.892767
	RP11-274B21.1	7	128171752	128269512	373	0.380134	0.048296	0.0774082	0.892767
	RP11-274B21.2	7	128291239	128292388	368	0.301817	0.0690744	0.110137	0.892767
	RP11-274B21.3	7	128294023	128294776	367	0.233526	0.0801289	0.109161	0.892767
	RP11-313J2.1	10	42827314	42863422	193	0.0437096	0.328161	0.0916398	0.892767
	RP11-326C3.15	11	333192	333688	335	0.283814	0.0648388	0.0844215	0.892767
	RP11-345P4.6	1	1605440	1605836	310	0.0608764	0.625637	0.109743	0.892767
	RP11-350N15.6	8	38265566	38265729	279	0.641962	0.0309183	0.104486	0.892767
	RP11-359I18.5	3	58476557	58477018	420	0.448468	0.0457313	0.112961	0.892767
	RP11-384P7.7	9	33697457	33700984	327	0.058982	0.200276	0.0632604	0.892767
	RP11-425D10.10	6	109703998	109704869	385	0.880854	0.0238661	0.0891275	0.892767
	RP11-428J1.4	6	5031990	5054657	634	0.0231137	0.777824	0.0853182	0.892767
	RP11-464O2.2	10	126392194	126402786	569	0.260879	0.0393014	0.074403	0.892767
	RP11-485G4.2	3	141876369	141880820	351	0.0388532	0.304918	0.0653399	0.892767
	RP11-488L18.10	1	247350583	247351828	466	0.0321523	0.429938	0.077983	0.892767
	RP11-49K24.8	18	44632317	44633773	539	0.696941	0.0408315	0.0967006	0.892767
	RP11-560J1.2	6	15244154	15245231	414	0.40458	0.0523395	0.101979	0.892767
	RP11-561C5.4	15	85747141	85778026	527	0.532766	0.0288874	0.095193	0.892767
	RP11-567M16.1	18	77338063	77349010	404	0.0258381	0.559868	0.0887068	0.892767
	RP11-572O17.1	4	1714548	1715349	273	0.155756	0.0672606	0.0724375	0.892767
	RP11-673E1.1	4	144833484	144903607	260	0.0692403	0.140863	0.0999455	0.892767
	RP11-678G14.3	19	21753624	21770124	307	0.317227	0.0610139	0.105041	0.892767
	RP11-71H17.9	3	124467422	124468120	631	0.0339679	0.717885	0.089705	0.892767
	RP11-861E21.2	18	12438889	12446510	410	0.0244519	0.561452	0.0826693	0.892767
	RP11-91J3.3	4	188334718	188336851	413	0.942789	0.0160873	0.0669735	0.892767
	RP3-402G11.25	22	50630153	50630831	398	0.0941239	0.116863	0.110101	0.892767
	RP4-593H12.1	7	107220002	107220421	375	0.0301528	0.6308	0.0982129	0.892767
	RP4-610C12.3	20	29521637	29522987	67	0.930894	0.0289708	0.11222	0.892767
	RP4-635E18.8	1	11089716	11090585	376	0.345066	0.0331845	0.0688027	0.892767
	RP4-647C14.2	14	73710726	73712687	399	0.388363	0.0405988	0.110093	0.892767
	RP4-669P10.19	22	42528610	42529005	360	0.0489004	0.630524	0.104489	0.892767
	RP6-42F4.1	1	120693320	120697146	168	0.288507	0.0348938	0.0874235	0.892767
	RPL7AP10	19	21332451	21333241	281	0.0835233	0.186039	0.0953524	0.892767
	RUNDC1	17	41132582	41145707	258	0.0478894	0.471402	0.0786763	0.892767
	SCIMP	17	5112256	5138155	465	0.0530355	0.646878	0.102111	0.892767
	SCO2	22	50961997	50964035	320	0.435974	0.0361108	0.102913	0.892767
	SELO	22	50639408	50656045	397	0.167161	0.0638535	0.0992386	0.892767
	SERPINA6	14	94770585	94789731	809	0.0408994	0.3966	0.107404	0.892767
	SERPINC1	1	173872947	173886516	262	0.035414	0.498719	0.0899179	0.892767
	SGCA	17	48243346	48253292	448	0.0442589	0.35303	0.0949179	0.892767
	SIGIRR	11	405716	417397	373	0.150561	0.0951761	0.0803595	0.892767
	SKINTL	1	48561764	48648100	492	0.189726	0.0604008	0.0651611	0.892767
	SLC1A7	1	53552855	53608289	488	0.0289478	0.906545	0.0734171	0.892767
	SLC25A34	1	16062900	16067891	444	0.0197536	0.869161	0.0710841	0.892767
	SLC5A4	22	32614465	32651328	579	0.157316	0.0370674	0.0685841	0.892767
	SMAD5	5	135468534	135524435	455	0.0275289	0.348404	0.0765326	0.892767
	SNHG18	5	9546312	9550721	702	0.0385898	0.622152	0.106278	0.892767
	SNHG8	4	119199864	119200978	281	0.0587551	0.67528	0.0877466	0.892767
	SNX1	15	64386322	64438289	292	0.0231934	0.692501	0.0806064	0.892767
	SNX13	7	17830385	17980124	513	0.729299	0.0236983	0.0885615	0.892767
	SPAG1	8	101170134	101271506	373	0.0339893	0.608421	0.106266	0.892767
	SRGAP2C	1	121107124	121129949	22	0.122419	0.156728	0.076091	0.892767
	SS18L1	20	60718822	60757540	535	0.0308836	0.728711	0.0932309	0.892767
	STX10	19	13254872	13261197	357	0.126512	0.246279	0.100157	0.892767
	STXBP5-AS1	6	147163037	147525560	431	0.0405366	0.228456	0.0699092	0.892767
	SYCE3	22	50989541	51001334	303	0.707084	0.0193657	0.0716164	0.892767
	TACC3	4	1723227	1746898	271	0.430467	0.0403629	0.0911554	0.892767
	TAS2R4	7	141478242	141479235	488	0.0369346	0.560737	0.10778	0.892767
	TCAM1P	17	61926652	61941739	329	0.324851	0.0293202	0.0762774	0.892767
	TCP11L1	11	33060963	33127489	308	0.674918	0.0259778	0.0788728	0.892767
	TCTE1	6	44247182	44265458	560	0.397211	0.077019	0.0906658	0.892767
	TDRD6	6	46655612	46671937	523	0.0380773	0.825237	0.0833192	0.892767
	THOC5	22	29901868	29950243	409	0.0449533	0.370623	0.103453	0.892767
	TMEM129	4	1717679	1723085	271	0.771005	0.0249473	0.0681564	0.892767
	TMEM184B	22	38615298	38669040	353	0.162381	0.102898	0.0936863	0.892767
	TMEM185B	2	120978854	120980984	325	0.473206	0.0395122	0.0972625	0.892767
	TMEM8B	9	35816141	35854844	422	0.0263949	0.562824	0.0889264	0.892767
	TMEM9B-AS1	11	8986321	8999074	359	0.0322847	0.558802	0.101107	0.892767
	TOMM7	7	22852251	22862470	502	0.0273004	0.873006	0.0874781	0.892767
	TRIP4	15	64679947	64747502	289	0.475486	0.0407995	0.106933	0.892767
	TRMT10B	9	37753804	37778969	478	0.0808178	0.153507	0.101734	0.892767
	TUBBP5	9	141044565	141071821	192	0.103019	0.0668992	0.0697991	0.892767
	TWSG1	18	9334765	9402418	502	0.15663	0.188512	0.112731	0.892767
	TYMP	22	50964181	50968485	318	0.820583	0.0211805	0.0806976	0.892767
	U3	4	159621843	159622060	273	0.756122	0.025332	0.0633947	0.892767
	ULK4	3	41288090	42003922	383	0.17564	0.0476078	0.0702244	0.892767
	UTP11L	1	38474930	38490496	464	0.0253027	0.990709	0.0999727	0.892767
	VSX2	14	74706175	74729441	400	0.0545922	0.535048	0.111282	0.892767
	WASH3P	15	102501612	102516757	191	0.0403798	0.67639	0.0872206	0.892767
	WDR6	3	49044588	49053236	263	0.134072	0.112582	0.11191	0.892767
	WDYHV1	8	124428965	124479470	540	0.485921	0.0515686	0.10734	0.892767
	WRN	8	30891317	31031285	373	0.575842	0.0333003	0.104667	0.892767
	XKR9	8	71581600	71702606	309	0.0519429	0.260002	0.106175	0.892767
	XXbac-BPG181B23.7	6	31362066	31363272	242	0.0236111	0.966438	0.0917418	0.892767
	ZNF107	7	64126511	64171404	285	0.79174	0.0258373	0.0668332	0.892767
	ZNF124	1	247285277	247335318	468	0.367239	0.141043	0.112882	0.892767
	ZNF213	16	3179778	3192806	390	0.0257904	0.991521	0.0823176	0.892767
	ZNF229	19	44921685	44952766	452	0.108986	0.211029	0.103153	0.892767
	ZNF260	19	37001597	37019562	315	0.19751	0.150783	0.106463	0.892767
	ZNF28	19	53300662	53324922	484	0.776308	0.0286607	0.0916886	0.892767
	ZNF334	20	45129701	45142198	558	0.051808	0.266412	0.108031	0.892767
	ZNF347	19	53627325	53662313	479	0.123522	0.0651631	0.0678717	0.892767
	ZNF510	9	99518147	99540411	249	0.0398533	0.461678	0.109482	0.892767
	ZNF567	19	37178530	37218603	285	0.071274	0.10925	0.0896615	0.892767
	ZNF585A	19	37597636	37663643	271	0.0372678	0.217075	0.0627056	0.892767
	ZNF585B	19	37672481	37708827	275	0.0558847	0.26526	0.0944757	0.892767
	ZNF607	19	38187264	38210691	296	0.0982643	0.173355	0.0935894	0.892767
	ZNF681	19	23921997	23941693	241	0.368221	0.0309153	0.0770696	0.892767
	ZNF682	19	20107867	20150315	268	0.763934	0.0265682	0.0908024	0.892767
	ZNF708	19	21473962	21512227	285	0.247324	0.0523621	0.0946772	0.892767
	ZNF736	7	63767837	63815238	305	0.0339275	0.467873	0.0989696	0.892767
	ZNF738	19	21541732	21562104	285	0.265738	0.0631309	0.0920516	0.892767
	ZNF840	20	45113100	45121279	560	0.0491349	0.286123	0.11265	0.892767
	ZNF880	19	52873170	52889048	486	0.1373	0.127726	0.0938574	0.892767
	ZNHIT6	1	86115106	86174116	536	0.230292	0.0889093	0.0942773	0.892767
	ANKRD65	1	1353800	1357149	293	0.0521305	0.704177	0.114195	0.897419
	GRIK2	6	101846664	102517958	381	0.244815	0.0960633	0.11408	0.897419
	MAPK9	5	179660143	179719099	444	0.711108	0.0381394	0.114204	0.897419
	CYB561D2	3	50388523	50395643	335	0.502078	0.0409498	0.115467	0.899818
	LINC01060	4	189321890	189602205	492	0.055407	0.366428	0.11475	0.899818
	MSL3P1	2	234774083	234777090	768	0.0455023	0.957181	0.115347	0.899818
	RCVRN	17	9799637	9808938	635	0.379158	0.0648101	0.114999	0.899818
	SSBP1	7	141438147	141487614	446	0.221441	0.179846	0.115605	0.899818
	TRABD	22	50624344	50638027	398	0.895635	0.030349	0.115287	0.899818
	A3GALT2	1	33772367	33786699	434	0.0370622	0.860211	0.117316	0.900477
	AC016773.1	4	1741078	1743830	270	0.39304	0.0473272	0.118598	0.900477
	AC018638.1	7	128293740	128293989	367	0.17723	0.0824388	0.123308	0.900477
	AL592494.5	1	121138614	121204983	22	0.118062	0.229373	0.123149	0.900477
	C9orf114	9	131581930	131592100	319	0.0417716	0.488281	0.117242	0.900477
	CTC-462L7.1	17	53246184	53250993	541	0.235832	0.0567175	0.117525	0.900477
	CTD-2245F17.3	19	53700364	53714268	475	0.136474	0.104141	0.120297	0.900477
	CTD-2262B20.1	15	85958459	85958864	540	0.274402	0.0732838	0.11938	0.900477
	CYP2D8P1	22	42545877	42551007	368	0.0597863	0.645758	0.123251	0.900477
	EFHD1	2	233470767	233547491	456	0.123005	0.0978511	0.116624	0.900477
	GCOM2	4	68904262	68905368	302	0.832834	0.034804	0.118799	0.900477
	GRWD1	19	48949030	48960279	526	0.269558	0.109902	0.123365	0.900477
	GYPE	4	144792020	144826716	258	0.0943343	0.148997	0.117422	0.900477
	IMPA1	8	82570196	82598928	346	0.099845	0.202855	0.123244	0.900477
	KCNC4	1	110753965	110825722	567	0.343177	0.0507941	0.122276	0.900477
	KRT18P34	3	156880452	156881721	423	0.111319	0.338306	0.120237	0.900477
	LINC00299	2	8147901	8523751	501	0.44726	0.0786859	0.117961	0.900477
	LINC00640	14	51800111	51832275	658	0.487122	0.103635	0.118555	0.900477
	MAP2K7	19	7968728	7979363	451	0.178466	0.105915	0.120289	0.900477
	MIR3916	1	247353153	247372795	465	0.10748	0.194682	0.123136	0.900477
	MTBP	8	121457662	121554373	434	0.0382715	0.487396	0.119081	0.900477
	PAPD4	5	78908243	78982471	435	0.657246	0.0628734	0.122702	0.900477
	PEPD	19	33877856	34012700	467	0.565075	0.0360836	0.117186	0.900477
	RALGDS	9	135973107	136024721	575	0.19774	0.0905728	0.119257	0.900477
	RANBP10	16	67757005	67840555	231	0.0514366	0.273234	0.117007	0.900477
	RN7SL417P	15	84948770	84949050	289	0.133958	0.104066	0.120266	0.900477
	RP11-326C3.11	11	318640	325631	328	0.820458	0.035228	0.12228	0.900477
	RP11-405L18.4	9	37490418	37490890	437	0.433656	0.0528105	0.120061	0.900477
	RP11-420G6.4	6	2854896	2881641	668	0.675193	0.0348189	0.122455	0.900477
	RP11-486O12.2	12	124066767	124069662	382	0.166936	0.0879273	0.117428	0.900477
	RP11-54A4.2	1	150521040	150530200	290	0.0341756	0.940236	0.119266	0.900477
	RP11-613M10.6	9	37509147	37510296	433	0.579893	0.046223	0.121842	0.900477
	RP11-673E1.3	4	144832667	144833206	260	0.131192	0.115544	0.121064	0.900477
	RP11-799B12.4	18	21740742	21742007	494	0.0373708	0.859126	0.120591	0.900477
	RP4-761J14.10	12	6852151	6852807	263	0.961665	0.049413	0.118761	0.900477
	SCTR	2	120197419	120282070	410	0.139771	0.344129	0.116121	0.900477
	SPATC1L	21	47581062	47604390	494	0.0779576	0.559624	0.121115	0.900477
	TBC1D9B	5	179289066	179334859	441	0.890612	0.033174	0.119781	0.900477
	TEX9	15	56536207	56738195	358	0.198068	0.145783	0.121748	0.900477
	TMEM136	11	120195838	120204391	554	0.366764	0.0487393	0.118024	0.900477
	TMEM245	9	111777432	111882225	608	0.765228	0.0377551	0.120928	0.900477
	TMEM80	11	695533	705028	476	0.0562029	0.510433	0.122652	0.900477
	RP11-91I8.3	18	6728820	6729167	603	0.0715845	0.567035	0.123608	0.900913
	AC004967.7	7	97598317	97601566	339	0.0436152	0.573197	0.125163	0.901164
	AC016995.3	2	38633861	38742882	451	0.939144	0.0335899	0.129108	0.901164
	AC018865.9	2	130794531	130795995	244	0.918345	0.0476376	0.125525	0.901164
	C19orf44	19	16607122	16632163	396	0.0541146	0.56755	0.127667	0.901164
	CCDC36	3	49235861	49295537	260	0.0482579	0.710047	0.124261	0.901164
	CTC-550B14.7	19	55517561	55559413	472	0.194503	0.084933	0.129077	0.901164
	CUBN	10	16865963	17171830	677	0.0855873	0.316004	0.126291	0.901164
	DPY19L2	12	63952693	64062629	331	0.172679	0.227609	0.127542	0.901164
	FAM53A	4	1619642	1686029	273	0.399012	0.05262	0.12775	0.901164
	FBXL5	4	15606162	15683284	558	0.332494	0.0574125	0.128448	0.901164
	HDAC10	22	50683612	50688288	398	0.760387	0.0358057	0.126969	0.901164
	IKBIP	12	99007183	99038891	443	0.559462	0.0461889	0.128707	0.901164
	LINC00323	21	42513427	42520060	585	0.92054	0.0660447	0.128672	0.901164
	LPAR2	19	19734477	19739739	346	0.866423	0.0396277	0.129026	0.901164
	MYCBPAP	17	48585745	48608862	473	0.248137	0.140131	0.126325	0.901164
	MYLK4	6	2663863	2751200	586	0.786212	0.03438	0.125295	0.901164
	NUDT12	5	102884556	102898494	386	0.228028	0.0859327	0.128139	0.901164
	ORMDL1	2	190635049	190649097	315	0.49731	0.0603367	0.126091	0.901164
	POLR2E	19	1086628	1095598	452	0.14188	0.131111	0.129122	0.901164
	PSMD5-AS1	9	123587106	123616651	359	0.0577952	0.277366	0.12913	0.901164
	R3HCC1L	10	99894387	100004654	535	0.939741	0.0332965	0.127846	0.901164
	RP11-274B21.4	7	128292895	128293719	368	0.33069	0.0583991	0.128703	0.901164
	RP11-299L17.3	14	81908331	81916501	441	0.10131	0.354469	0.124158	0.901164
	RP11-473M20.9	16	3126912	3137101	381	0.0422661	0.991978	0.126535	0.901164
	RPAP1	15	41809374	41836467	364	0.269718	0.0620907	0.129083	0.901164
	SH3GLB2	9	131769376	131790582	351	0.267281	0.0668741	0.128712	0.901164
	SRGAP1	12	64238073	64541319	302	0.0882623	0.336364	0.129023	0.901164
	SYNC	1	33160466	33169197	242	0.969981	0.0383016	0.127889	0.901164
	ZNF160	19	53569859	53606689	485	0.793435	0.0400311	0.123995	0.901164
	ZNF430	19	21203426	21242856	276	0.704304	0.0478434	0.126574	0.901164
	ALS2	2	202565277	202645912	425	0.313752	0.0751368	0.129477	0.902313
	DALRD3	3	49053387	49059726	265	0.215137	0.100825	0.129775	0.903107
	DLGAP1-AS1	18	3593730	3598350	549	0.0691167	0.514873	0.129979	0.903251
	AC010883.5	2	43456712	43460533	496	0.0498716	0.425519	0.130853	0.90519
	CHST2	3	142838173	142841800	550	0.175827	0.205044	0.131315	0.90519
	FAM72B	1	120837756	120855681	101	0.0529817	0.538133	0.13136	0.90519
	G6PC2	2	169757750	169766505	570	0.0532969	0.468454	0.130545	0.90519
	IGF1R	15	99192200	99507759	627	0.275071	0.100773	0.131349	0.90519
	PIGV	1	27113963	27124889	294	0.296368	0.0881603	0.130695	0.90519
	CBY1	22	39052645	39069859	369	0.0699349	0.452859	0.132626	0.906652
	RP11-182J1.14	15	84944427	84950601	284	0.130208	0.189713	0.132424	0.906652
	RP11-475N22.4	3	128208055	128221191	366	0.0353787	0.941205	0.131837	0.906652
	SERPINB9	6	2887500	2903514	673	0.491716	0.0441689	0.132676	0.906652
	TC2N	14	92246095	92333880	456	0.46627	0.0659935	0.13231	0.906652
	ZNF337	20	25666203	25677477	240	0.101418	0.24164	0.132511	0.906652
	CCDC104	2	55746740	55773015	442	0.360306	0.06133	0.133776	0.906821
	CTD-2561J22.5	19	21627043	21646710	299	0.129277	0.148973	0.133532	0.906821
	DRD4	11	637293	640706	471	0.0700271	0.259322	0.134321	0.906821
	GULP1	2	189156396	189460653	283	0.0487745	0.630537	0.134359	0.906821
	LILRA3	19	54799854	54809952	459	0.154981	0.100087	0.134542	0.906821
	LINC00471	2	232373137	232379050	359	0.39399	0.0730478	0.134504	0.906821
	NMB	15	85198360	85201794	378	0.051993	0.748246	0.134308	0.906821
	P4HTM	3	49027422	49044494	264	0.773057	0.0386426	0.132899	0.906821
	RP11-766N7.3	12	65277174	65371302	321	0.144608	0.192836	0.134252	0.906821
	SLC18B1	6	133090509	133119701	550	0.14214	0.16492	0.133574	0.906821
	CICP14	7	128296016	128298845	366	0.32499	0.0639829	0.134783	0.90701
	HEATR4	14	73945189	74025651	363	0.0437731	0.678054	0.134938	0.90701
	AC009228.1	2	24437250	24444385	276	0.291648	0.0627521	0.136094	0.907288
	FAM107A	3	58549844	58613337	385	0.770457	0.0510443	0.136356	0.907288
	HMHA1	19	1065922	1086593	468	0.0776165	0.227441	0.136452	0.907288
	HSD17B12	11	43577986	43878160	512	0.0424419	0.601048	0.136428	0.907288
	MX1	21	42792231	42831141	639	0.274356	0.129895	0.135571	0.907288
	RP11-274B21.9	7	128330505	128331771	367	0.670356	0.0396615	0.135908	0.907288
	SEC22C	3	42589461	42642572	474	0.0754164	0.312373	0.135403	0.907288
	SPG21	15	65255362	65282648	304	0.321868	0.0826976	0.135807	0.907288
	CAND1	12	67663061	67713731	532	0.0491547	0.621283	0.137838	0.910362
	CENPQ	6	49431091	49460820	347	0.0659178	0.303162	0.137593	0.910362
	CHMP6	17	78965398	78983317	444	0.629784	0.0456071	0.137641	0.910362
	RP11-613D13.5	11	43851259	43902276	521	0.504036	0.0601006	0.137787	0.910362
	SUMF2	7	56131695	56148363	279	0.0642177	0.295362	0.137435	0.910362
	AC006262.5	19	46692423	46706340	415	0.0689411	0.605896	0.152431	0.911252
	AC016683.6	2	113969099	114034158	458	0.0766233	0.265244	0.15214	0.911252
	AC103965.1	15	84867600	84898888	246	0.310239	0.0662275	0.146181	0.911252
	ACTR8	3	53901093	53916212	507	0.0494813	0.532436	0.14275	0.911252
	ADAM23	2	207308263	207485851	438	0.0414937	0.819778	0.145678	0.911252
	AP1AR	4	113152893	113191203	389	0.0399589	0.923092	0.140915	0.911252
	APAF1	12	99038919	99128461	443	0.589022	0.0472452	0.145172	0.911252
	APBB1IP	10	26727132	26856732	440	0.0829758	0.448625	0.138819	0.911252
	ASAP1	8	131064353	131455906	542	0.347667	0.0757075	0.147721	0.911252
	ATXN10	22	46067678	46241187	501	0.0587381	0.470627	0.143184	0.911252
	ATXN3	14	92525878	92572965	524	0.641236	0.0747878	0.150133	0.911252
	BACE2	21	42539728	42654445	583	0.970536	0.0749313	0.152986	0.911252
	BEND6	6	56819773	56892140	280	0.802094	0.0465248	0.146429	0.911252
	BOLA3-AS1	2	74375136	74377188	357	0.301887	0.0720477	0.143748	0.911252
	C1orf101	1	244617679	244804479	461	0.0485207	0.784028	0.152906	0.911252
	C22orf34	22	49808176	50051190	629	0.625378	0.0719222	0.144321	0.911252
	C7orf13	7	156431057	156433348	465	0.774561	0.0496652	0.152664	0.911252
	CASP16	16	3194220	3199964	392	0.0508411	0.995731	0.148947	0.911252
	CENPJ	13	25457171	25497018	540	0.988332	0.0361146	0.138408	0.911252
	CPVL	7	29034847	29235067	694	0.106294	0.275137	0.153119	0.911252
	CRYL1	13	20977806	21099996	501	0.0614764	0.491285	0.152612	0.911252
	CTB-171A8.1	19	45135500	45222031	435	0.185277	0.160033	0.141283	0.911252
	CTD-2248H3.1	5	80538149	80538418	447	0.0856371	0.476324	0.146134	0.911252
	CTD-2325M2.1	19	8073613	8080909	435	0.830329	0.0514285	0.147612	0.911252
	CTD-3107M8.2	8	30207382	30207863	356	0.241264	0.163258	0.149264	0.911252
	CYP2D7P1	22	42536214	42540576	362	0.0747122	0.657542	0.150429	0.911252
	DDI2	1	15943995	15995539	477	0.0428368	0.78909	0.149211	0.911252
	DDO	6	110712974	110736765	410	0.990692	0.0395312	0.149594	0.911252
	DPH7	9	140449356	140473387	348	0.22442	0.176805	0.139581	0.911252
	FGFR3	4	1795034	1810599	278	0.228582	0.0921412	0.147471	0.911252
	FLJ00104	16	87733757	87739290	493	0.240379	0.133389	0.150064	0.911252
	FNBP1P1	2	74347807	74350345	360	0.121527	0.166691	0.148718	0.911252
	GP1BA	17	4835592	4838325	447	0.044076	0.809864	0.15089	0.911252
	GPRC5B	16	19868908	19897489	434	0.249579	0.218258	0.142514	0.911252
	HOXA1	7	27132612	27135615	419	0.0499974	0.574582	0.151914	0.911252
	HOXA5	7	27180671	27183287	396	0.0422254	0.771929	0.143346	0.911252
	hsa-mir-8072	12	123848415	123850660	346	0.118446	0.375699	0.145429	0.911252
	IMMP1L	11	31453948	31531192	268	0.254002	0.0891851	0.141747	0.911252
	LINC00664	19	21666176	21686040	295	0.309641	0.0757009	0.139897	0.911252
	LINC00961	9	35909480	35911683	438	0.536105	0.0646985	0.148328	0.911252
	LPAR5	12	6728001	6745613	300	0.868065	0.069782	0.142163	0.911252
	MARCO	2	119699742	119752236	530	0.0414718	0.982512	0.146789	0.911252
	MFAP3	5	153418497	153600038	550	0.0828829	0.526669	0.152174	0.911252
	MORC2	22	31322642	31364284	381	0.565033	0.0496327	0.139737	0.911252
	MTND5P28	2	120972757	120974855	327	0.202168	0.0890801	0.14473	0.911252
	NEURL1B	5	172068269	172118543	550	0.0422011	0.861476	0.145938	0.911252
	NLN	5	65018023	65167553	381	0.962184	0.0660321	0.142101	0.911252
	NTNG1	1	107682629	108026080	467	0.358296	0.0816194	0.144507	0.911252
	OAF	11	120081475	120101041	546	0.935913	0.0571516	0.148814	0.911252
	OSGEPL1-AS1	2	190629581	190630282	317	0.798784	0.0444224	0.149933	0.911252
	PCDHB15	5	140625147	140627799	467	0.0563109	0.900049	0.14914	0.911252
	PDE1A	2	183004763	183387919	426	0.124971	0.204326	0.153147	0.911252
	PPP5C	19	46850251	46896238	413	0.0828058	0.392399	0.142068	0.911252
	RIC8A	11	207511	215113	280	0.104131	0.16077	0.141384	0.911252
	RNF32	7	156433368	156469824	465	0.370928	0.079821	0.149938	0.911252
	RP11-121E16.1	12	91755973	91762383	375	0.0947534	0.502126	0.153459	0.911252
	RP11-131L23.1	1	85743324	85913807	545	0.216557	0.103355	0.14096	0.911252
	RP11-138B4.1	4	188225237	188230836	431	0.159254	0.129648	0.148368	0.911252
	RP11-184J23.2	1	47540450	47541651	410	0.0741296	0.574784	0.143102	0.911252
	RP11-274B21.10	7	128307097	128308210	366	0.256348	0.0882461	0.15167	0.911252
	RP11-326C3.13	11	325703	326294	331	0.837	0.0447669	0.153509	0.911252
	RP11-470E16.1	1	59597608	59664293	400	0.544293	0.067095	0.144175	0.911252
	RP11-483C6.1	14	27061953	27063723	424	0.229515	0.0837575	0.149579	0.911252
	RP11-65I12.1	2	113998403	113998987	458	0.123661	0.140815	0.151737	0.911252
	RP11-798G7.5	17	43580626	43612076	157	0.542343	0.05512	0.142748	0.911252
	RP11-95D17.1	2	10076489	10079719	537	0.0812755	0.504915	0.145888	0.911252
	RP3-522J7.6	22	50226264	50231434	513	0.15924	0.110683	0.140948	0.911252
	RP5-1024N4.4	1	48693560	48695233	485	0.0635065	0.830468	0.146708	0.911252
	RP5-1109J22.1	1	46897801	46911193	360	0.712011	0.0453792	0.152743	0.911252
	RPL7L1	6	42847356	42857663	352	0.40958	0.0709758	0.151509	0.911252
	RRM1	11	4115937	4160106	509	0.0844691	0.634264	0.15124	0.911252
	RRP15	1	218458629	218511325	477	0.293812	0.0854516	0.153214	0.911252
	SNAPC4	9	139270029	139293249	366	0.142471	0.504674	0.153352	0.911252
	SNORA12	2	55792839	55792986	445	0.104366	0.180268	0.142869	0.911252
	SUCLA2	13	48510622	48612125	367	0.325021	0.112569	0.149374	0.911252
	SULT1B1	4	70586880	70653679	495	0.177339	0.12582	0.151208	0.911252
	TOR3A	1	179050512	179067158	463	0.074952	0.426533	0.139891	0.911252
	TUBG2	17	40811323	40819024	260	0.225196	0.204909	0.143961	0.911252
	WDR63	1	85464830	85598821	580	0.255345	0.113484	0.152758	0.911252
	WEE2-AS1	7	141404138	141438120	446	0.0635792	0.387374	0.139319	0.911252
	ZNF506	19	19896648	19932560	300	0.0974107	0.228352	0.148366	0.911252
	ZNF577	19	52359055	52391233	619	0.0494746	0.605816	0.14688	0.911252
	ZNF683	1	26688125	26701013	380	0.0510088	0.561096	0.148822	0.911252
	ZSCAN18	19	58595205	58629794	438	0.0797764	0.520139	0.14653	0.911252
	CEACAMP3	19	42106090	42112339	306	0.0625439	0.949324	0.153986	0.91224
	CTNNAL1	9	111704851	111775809	621	0.490031	0.0761745	0.154046	0.91224
	FAM20B	1	178994939	179045697	459	0.549599	0.10685	0.155008	0.914284
	GUCY2EP	11	76405087	76418685	481	0.545005	0.056341	0.155133	0.914284
	NDUFA6	22	42481529	42486934	351	0.0469868	0.763095	0.154672	0.914284
	RP1L1	8	10463859	10569697	691	0.0546861	0.726779	0.155051	0.914284
	GRHPR	9	37422663	37436987	464	0.701297	0.0619975	0.156194	0.918338
	LINC00173	12	116971227	116974318	421	0.354588	0.0750159	0.15612	0.918338
	AC003973.6	19	22180450	22181642	299	0.559051	0.0921522	0.158869	0.922823
	C12orf65	12	123717463	123742506	347	0.0777673	0.479035	0.158123	0.922823
	ENDOG	9	131580753	131581464	313	0.0828419	0.345961	0.159017	0.922823
	GAS2L3	12	100967461	101022064	447	0.664631	0.0879281	0.158703	0.922823
	GOLGA6L3	15	85783703	85790410	531	0.293192	0.0788712	0.157937	0.922823
	MEGF9	9	123363091	123476748	343	0.068569	0.325584	0.158028	0.922823
	NAT6	3	50333833	50336852	329	0.385336	0.153205	0.158836	0.922823
	RP11-747H7.3	14	92223103	92226142	447	0.408146	0.0931101	0.157421	0.922823
	RP4-669P10.16	22	42535623	42535938	363	0.151504	0.161958	0.158048	0.922823
	TMA16	4	164415594	164441691	395	0.0678255	0.434576	0.158419	0.922823
	ZNF818P	19	53716241	53716649	477	0.196963	0.110293	0.158791	0.922823
	CDH13	16	82660408	83830204	935	0.374563	0.122844	0.159313	0.923455
	CCDC88C	14	91737667	91884188	390	0.656291	0.0792522	0.159642	0.924224
	SLC22A5	5	131705444	131731306	421	0.13214	0.474488	0.159821	0.924224
	AC005519.4	14	74755830	74761128	383	0.0538034	0.551193	0.16141	0.924239
	ACVR2A	2	148602086	148687967	337	0.861946	0.0452196	0.162075	0.924239
	DCAF10	9	37800499	37867663	495	0.59918	0.0779447	0.161769	0.924239
	FKBP1B	2	24272571	24286551	333	0.985907	0.0440418	0.162016	0.924239
	LRRC23	12	7013897	7023407	200	0.501735	0.0806352	0.1601	0.924239
	MARVELD1	10	99472930	99477907	438	0.0564928	0.712768	0.161386	0.924239
	MFF	2	228189881	228222550	535	0.193396	0.121362	0.1616	0.924239
	PACRGL	4	20697905	20754530	481	0.519272	0.0682278	0.161433	0.924239
	RP11-21L23.3	11	76493625	76494106	474	0.201448	0.112051	0.160354	0.924239
	RP11-702H23.2	11	74196625	74197096	412	0.0505388	0.726721	0.161564	0.924239
	TREX1	3	48507116	48509044	257	0.532943	0.0604269	0.161346	0.924239
	ZDHHC11	5	710471	851101	363	0.538328	0.0728691	0.160517	0.924239
	CTC-484P3.1	5	94161666	94162399	409	0.417702	0.0897565	0.162573	0.924713
	HIST2H3DP1	1	120904675	120905006	78	0.656969	0.0622084	0.163472	0.924713
	LRRC27	10	134145614	134195010	463	0.460981	0.0821518	0.163387	0.924713
	METTL4	18	2537524	2571508	514	0.186856	0.157627	0.163406	0.924713
	RMDN2	2	38150330	38294285	590	0.733533	0.0603057	0.162938	0.924713
	RP1-257A7.4	6	13265093	13295818	524	0.994759	0.0436422	0.162832	0.924713
	TPTE2P1	13	25498815	25542625	529	0.473362	0.0628402	0.163052	0.924713
	ING5	2	242641455	242668893	236	0.0544759	0.877861	0.164141	0.926016
	PHACTR4	1	28696114	28826881	280	0.124236	0.472945	0.16414	0.926016
	RP11-95O2.5	18	34826853	34827148	376	0.220834	0.182867	0.164266	0.926016
	AP000344.4	22	23788785	23803020	506	0.0791107	0.653424	0.16483	0.927075
	STAG3L2	7	74112305	74306731	100	0.0589453	0.980382	0.164758	0.927075
	C16orf95	16	87117168	87351022	560	0.25311	0.115234	0.165437	0.929427
	ASH1L	1	155305059	155491409	234	0.895888	0.0458515	0.166273	0.930386
	C19orf54	19	41246766	41257458	433	0.0941087	0.585523	0.166045	0.930386
	CDRT15P1	17	13927831	13928805	608	0.77555	0.0506577	0.166082	0.930386
	DDX31	9	135468384	135545421	539	0.596664	0.0647538	0.166552	0.930386
	WAC-AS1	10	28811581	28821421	583	0.23416	0.128489	0.166543	0.930386
	MRPL18	6	160210844	160219468	560	0.0701972	0.626134	0.166758	0.930483
	RAMP2-AS1	17	40905932	40913211	261	0.0774835	0.397639	0.16695	0.9305
	AC093668.2	7	102120179	102121095	242	0.0543984	0.819774	0.167286	0.930765
	CPEB3	10	93806449	94050844	303	0.0478583	0.937605	0.168006	0.930765
	FAM57A	17	635652	646206	395	0.247475	0.0924835	0.167672	0.930765
	RBM44	2	238707388	238751450	529	0.146783	0.32427	0.168131	0.930765
	RP11-339B21.10	9	131193877	131194285	293	0.17197	0.198852	0.167878	0.930765
	SDK1	7	3341080	4308632	574	0.254677	0.110298	0.167868	0.930765
	CTPS1	1	41445007	41478235	421	0.110731	0.393122	0.169158	0.931584
	MCC	5	112357796	112824527	563	0.0465242	0.921823	0.169224	0.931584
	PIGX	3	196439229	196462878	403	0.169783	0.400571	0.168739	0.931584
	SEPP1	5	42804758	42887494	321	0.360439	0.182691	0.168707	0.931584
	WDR88	19	33622996	33666701	437	0.637975	0.0633978	0.1692	0.931584
	CTC-297N7.8	17	10575791	10579323	514	0.15069	0.262871	0.169937	0.931627
	GAPT	5	57787262	57792917	523	0.660209	0.0614783	0.1697	0.931627
	RP11-286H15.1	2	128383572	128384423	405	0.0814002	0.408718	0.169988	0.931627
	ZNF663P	20	45042867	45087915	549	0.0830106	0.30156	0.169917	0.931627
	RP11-554J4.1	2	55845114	55845200	432	0.0894156	0.31052	0.170401	0.932851
	AC009336.24	2	177043153	177043736	463	0.131866	0.270575	0.191697	0.933309
	AC012358.8	2	55535628	55573185	488	0.578814	0.120586	0.191489	0.933309
	AC018865.8	2	130748029	130808704	239	0.993346	0.0681425	0.175872	0.933309
	AC108448.2	11	3105623	3106673	423	0.0593608	0.691804	0.17813	0.933309
	ACCS	11	44087475	44105764	540	0.858798	0.0555435	0.192648	0.933309
	ADHFE1	8	67344718	67383675	305	0.609859	0.0585162	0.180104	0.933309
	ADO	10	64564516	64568238	470	0.116888	0.51109	0.182458	0.933309
	ALMS1P	2	73872046	73912703	356	0.464935	0.0910546	0.180369	0.933309
	ANGEL2	1	213165524	213189168	420	0.0615082	0.849772	0.173746	0.933309
	AP001816.1	4	102268937	102270040	359	0.123774	0.361843	0.19205	0.933309
	ARIH2	3	48958913	49023815	267	0.212821	0.197847	0.186535	0.933309
	ASNSD1	2	190526111	190535557	292	0.356778	0.0945989	0.192525	0.933309
	ASPDH	19	51014857	51017947	462	0.189784	0.116799	0.172012	0.933309
	C19orf24	19	1275026	1279248	412	0.412565	0.145372	0.182269	0.933309
	C1orf174	1	3805689	3816849	452	0.0694783	0.440975	0.172373	0.933309
	C1QTNF6	22	37576207	37595425	648	0.182336	0.275926	0.173577	0.933309
	C8orf46	8	67372238	67430759	300	0.743875	0.0529864	0.177918	0.933309
	CAMLG	5	134074191	134087847	307	0.144187	0.165881	0.176487	0.933309
	CCDC53	12	102406705	102455927	453	0.167506	0.16196	0.190782	0.933309
	CCM2	7	45039074	45116068	436	0.662417	0.0972079	0.18147	0.933309
	CDA	1	20915441	20945401	483	0.0964244	0.516915	0.190108	0.933309
	CHST12	7	2443223	2474242	426	0.729684	0.0648969	0.189295	0.933309
	CSF1	1	110452864	110473614	474	0.619759	0.0631727	0.176875	0.933309
	CTB-109A12.1	5	156789623	156887026	522	0.398496	0.0720311	0.171646	0.933309
	CTB-113P19.4	5	151031836	151035010	573	0.116891	0.54174	0.181331	0.933309
	CTC-471C19.1	5	6019142	6022396	611	0.0899984	0.515411	0.187792	0.933309
	CTD-2260A17.1	5	96120481	96121703	502	0.0931886	0.873927	0.190236	0.933309
	DET1	15	89054790	89089906	465	0.630807	0.0799503	0.192156	0.933309
	DNAH6	2	84743579	85046713	344	0.0490009	0.903039	0.175599	0.933309
	DNM1P47	15	102291235	102334505	371	0.0743557	0.659495	0.19095	0.933309
	DNM1P51	15	84953014	84966399	313	0.386287	0.0779229	0.181529	0.933309
	EFEMP2	11	65633912	65641063	351	0.0571899	0.732437	0.171764	0.933309
	EIF3B	7	2393721	2420380	415	0.196879	0.138823	0.184779	0.933309
	EVI5L	19	7895119	7929862	443	0.195609	0.15065	0.175239	0.933309
	FBXO31	16	87361033	87423366	585	0.195474	0.187352	0.190721	0.933309
	FTSJ2	7	2273866	2281840	420	0.566645	0.0562706	0.1709	0.933309
	GAS8	16	90086037	90111383	277	0.0730228	0.640358	0.191474	0.933309
	GJB2	13	20761609	20767037	452	0.101568	0.699699	0.17777	0.933309
	GLRA3	4	175558065	175750465	392	0.444986	0.0839731	0.177399	0.933309
	GRIP2	3	14530858	14583588	633	0.113667	0.578932	0.185	0.933309
	HAAO	2	42994229	43019732	455	0.329965	0.100242	0.188844	0.933309
	HAO2	1	119911402	119936753	442	0.705323	0.0651763	0.184456	0.933309
	HPS1	10	100175955	100206684	478	0.147839	0.215688	0.180371	0.933309
	IGHV2-70	14	107178820	107179338	58	0.0906507	0.487923	0.190394	0.933309
	IKBKAP	9	111629797	111696396	608	0.268625	0.115869	0.172477	0.933309
	KLHDC4	16	87730091	87799598	468	0.244015	0.14381	0.186334	0.933309
	KLHL30	2	239047363	239061588	491	0.0992686	0.326266	0.181985	0.933309
	LGALS7B	19	39279851	39282389	402	0.242559	0.176972	0.191369	0.933309
	LINC00484	9	93921855	93927858	568	0.185333	0.122944	0.176898	0.933309
	MED20	6	41873092	41888877	477	0.0959012	0.292197	0.178021	0.933309
	MICA	6	31371356	31383092	242	0.0555128	0.980996	0.184543	0.933309
	MKKS	20	10381657	10414870	578	0.945901	0.0623158	0.192476	0.933309
	MKRN7P	20	45092541	45093763	548	0.0768607	0.353374	0.179389	0.933309
	MROH8	20	35729629	35807991	317	0.139505	0.280371	0.187708	0.933309
	MRPS18AP1	3	48297840	48298076	251	0.0726903	0.477118	0.18631	0.933309
	MRPS9	2	105654441	105716418	481	0.137232	0.287258	0.192528	0.933309
	MS4A14	11	60163775	60185161	459	0.225413	0.115059	0.188872	0.933309
	MTMR3	22	30279144	30426855	396	0.166217	0.183519	0.181515	0.933309
	NDUFB1	14	92582466	92588261	526	0.1478	0.244966	0.17923	0.933309
	NFRKB	11	129733531	129765485	464	0.87512	0.0582659	0.179615	0.933309
	NME6	3	48334754	48343175	258	0.0770396	0.511723	0.1889	0.933309
	NOL8	9	95059640	95087765	411	0.226472	0.143304	0.174833	0.933309
	NSUN4	1	46805849	46830824	377	0.481113	0.0683106	0.179396	0.933309
	PAX8	2	113973574	114036527	461	0.0816426	0.300606	0.173606	0.933309
	PAX9	14	37126773	37148493	583	0.0915654	0.355737	0.19081	0.933309
	PDCD1LG2	9	5510545	5571282	432	0.364677	0.13407	0.177409	0.933309
	PLEKHO2	15	65134088	65160206	293	0.528394	0.0710797	0.186881	0.933309
	PNMAL1	19	46969748	46974820	379	0.122288	0.267642	0.191769	0.933309
	PPP1R3C	10	93388199	93392811	350	0.0650604	0.585127	0.186325	0.933309
	PSMB7	9	127115745	127177723	401	0.513011	0.136005	0.186684	0.933309
	PVR	19	45147098	45166850	429	0.615332	0.11653	0.185704	0.933309
	QRICH1	3	49067140	49131796	255	0.142666	0.208743	0.177653	0.933309
	RBM43	2	152104454	152118393	455	0.284601	0.180803	0.190792	0.933309
	RIBC2	22	45809572	45828376	577	0.793947	0.0804003	0.179693	0.933309
	RIPPLY2	6	84562985	84567234	337	0.270666	0.203726	0.18035	0.933309
	ROBO3	11	124735282	124751362	497	0.0691738	0.432068	0.175623	0.933309
	RP11-122C5.1	5	38710469	38720375	471	0.821154	0.0506189	0.175414	0.933309
	RP11-159F24.5	5	43515376	43525412	255	0.879592	0.0731332	0.17445	0.933309
	RP11-260E18.1	5	16616035	16630078	497	0.12348	0.194281	0.17631	0.933309
	RP11-261P9.4	20	57285851	57286689	552	0.943133	0.079199	0.172842	0.933309
	RP11-294O2.2	4	165675216	165724947	430	0.199028	0.292413	0.191885	0.933309
	RP11-299H21.1	2	101768122	101771872	450	0.0634236	0.704015	0.190405	0.933309
	RP11-334C17.5	17	78174472	78179748	484	0.14036	0.249441	0.18885	0.933309
	RP11-398E10.1	14	45232360	45252032	337	0.860595	0.0927256	0.181697	0.933309
	RP11-3J10.4	9	37885680	37886387	520	0.339549	0.132674	0.191171	0.933309
	RP11-432J22.2	9	138799658	138805359	429	0.351189	0.120245	0.174062	0.933309
	RP11-473M20.14	16	3166043	3184883	390	0.0524118	0.994844	0.172437	0.933309
	RP11-495P10.2	1	147835127	147931933	34	0.0519649	0.843927	0.177624	0.933309
	RP11-517P14.2	10	43916186	43917548	452	0.749986	0.0725142	0.188239	0.933309
	RP11-554A11.9	11	68923378	68927220	450	0.0841941	0.380082	0.187454	0.933309
	RP11-585P4.5	12	75877904	75883600	504	0.298421	0.142839	0.183309	0.933309
	RP11-672A2.1	11	76423440	76430652	491	0.164025	0.153181	0.17898	0.933309
	RP11-678G14.2	19	21737442	21752039	306	0.148577	0.178844	0.182135	0.933309
	RP11-876N24.5	16	11032743	11033901	558	0.106891	0.347494	0.181417	0.933309
	RP11-94C24.8	17	48614655	48616115	468	0.868466	0.0645293	0.189482	0.933309
	RP4-758J24.5	1	54492356	54494172	482	0.10282	0.353355	0.190761	0.933309
	RPS6KB2	11	67195931	67202872	242	0.34433	0.113894	0.177267	0.933309
	RSPH3	6	159393903	159421219	542	0.177707	0.155613	0.178683	0.933309
	SIRPB1	20	1544167	1600707	626	0.0586985	0.566851	0.171265	0.933309
	SLC22A18	11	2921021	2946476	484	0.0803501	0.383084	0.177849	0.933309
	SNED1	2	241938255	242034011	471	0.260185	0.160753	0.174774	0.933309
	SPAG8	9	35808042	35812269	423	0.121906	0.298327	0.183058	0.933309
	SPIRE2	16	89884587	89937727	364	0.0840043	0.538825	0.188286	0.933309
	SPTLC1	9	94794281	94877666	463	0.695941	0.103602	0.184904	0.933309
	STPG1	1	24683489	24743424	420	0.0634564	0.984422	0.181497	0.933309
	TAF1B	2	9983483	10074545	492	0.12521	0.270408	0.186931	0.933309
	TMEM236	10	18041218	18089855	379	0.134995	0.247416	0.190726	0.933309
	TPD52L1	6	125440195	125585553	461	0.195417	0.148856	0.188213	0.933309
	TPRA1	3	127291912	127317065	465	0.0610163	0.770825	0.172086	0.933309
	VSIG10L	19	51834790	51845378	655	0.12055	0.671269	0.182072	0.933309
	YEATS2-AS1	3	183524245	183528262	476	0.079649	0.406356	0.175373	0.933309
	YJEFN3	19	19640173	19648390	353	0.30386	0.110766	0.192601	0.933309
	ZNF208	19	22115760	22193751	307	0.621038	0.122647	0.18117	0.933309
	ZNF285B	19	44971858	44977444	452	0.96834	0.0661413	0.188354	0.933309
	ZNF528	19	52901102	52921657	464	0.726254	0.0694186	0.188238	0.933309
	ZNF641	12	48733791	48745197	472	0.0753668	0.758755	0.191816	0.933309
	ZNF763	19	12075852	12091196	315	0.313335	0.0969522	0.189911	0.933309
	AC000123.4	7	126990182	126991577	485	0.0979009	0.401711	0.19526	0.934945
	AC108004.2	17	33615	41378	199	0.30704	0.115839	0.193191	0.934945
	C14orf79	14	105452112	105465864	317	0.116585	0.412214	0.195868	0.934945
	CD1B	1	158297741	158301321	517	0.804629	0.0634633	0.195482	0.934945
	CTD-2547L24.3	14	91709103	91717426	384	0.756279	0.0927253	0.193916	0.934945
	CTD-3092A11.1	15	30762982	30799826	133	0.384346	0.131287	0.194641	0.934945
	IL1RN	2	113864791	113891593	471	0.531351	0.073001	0.196021	0.934945
	KCNA2	1	111136202	111174096	531	0.707587	0.0631187	0.19423	0.934945
	PEBP1	12	118573832	118583389	507	0.0748212	0.493885	0.195263	0.934945
	RP11-332H18.4	17	59470817	59488916	317	0.517818	0.0772174	0.195067	0.934945
	RP11-439A17.7	1	120835810	120838290	101	0.151176	0.215544	0.194484	0.934945
	RP3-508I15.9	22	39063668	39077825	373	0.0906983	0.594958	0.194461	0.934945
	RP5-874C20.3	6	28234788	28245974	426	0.13166	0.445826	0.194256	0.934945
	RRP12	10	99116115	99160871	487	0.199646	0.262154	0.195884	0.934945
	SLU7	5	159828648	159848718	468	0.0789245	0.520756	0.195879	0.934945
	ZNF732	4	264464	299110	225	0.980662	0.0542685	0.194589	0.934945
	RP1-265C24.5	6	28083406	28084329	478	0.191576	0.437038	0.196589	0.936746
	RP11-353N4.6	1	149576149	149616786	54	0.124177	0.243136	0.19708	0.938172
	TMEM194A	12	57449426	57481846	335	0.121458	0.279347	0.197269	0.938172
	NDUFS3	11	47600568	47606114	274	0.947543	0.0773795	0.197524	0.938478
	CTD-3065B20.2	15	91139072	91139679	464	0.0836003	0.478296	0.197721	0.938509
	AC131097.3	2	242823514	243020873	162	0.0603041	0.876153	0.202445	0.940189
	AC138783.12	7	74702428	74714647	45	0.593516	0.0842786	0.200023	0.940189
	AL022393.7	6	28143966	28144452	467	0.0923061	0.334671	0.201611	0.940189
	ANO2	12	5641035	6055398	581	0.580696	0.116758	0.200893	0.940189
	C11orf53	11	111126707	111157126	460	0.13119	0.601939	0.201047	0.940189
	C2orf43	2	20883788	21022882	512	0.961923	0.0577655	0.200985	0.940189
	CARD6	5	40841286	40860275	443	0.157801	0.445168	0.200691	0.940189
	CTC-236F12.4	5	55753622	55777596	546	0.221859	0.172896	0.201115	0.940189
	DEFB124	20	30053309	30060841	225	0.199322	0.193985	0.200603	0.940189
	DNAJC3-AS1	13	96300987	96329179	508	0.981079	0.0778463	0.202357	0.940189
	FANCA	16	89803957	89883065	365	0.190682	0.276725	0.201563	0.940189
	GATAD1	7	92076767	92088150	307	0.166717	0.288312	0.202464	0.940189
	IL20RB	3	136676707	136729927	330	0.0822255	0.406719	0.201766	0.940189
	LINC00959	10	131864638	131909081	630	0.0781262	0.742947	0.199472	0.940189
	LINC01003	7	152160871	152162634	251	0.120255	0.324678	0.199411	0.940189
	MOV10L1	22	50528308	50600119	407	0.422092	0.10866	0.201364	0.940189
	RP1-152L7.5	6	52530072	52531676	580	0.329874	0.122802	0.19961	0.940189
	RP11-23F23.2	11	4208370	4223885	522	0.107882	0.684577	0.202168	0.940189
	RP11-499P20.2	10	18802044	18834489	600	0.0581409	0.914691	0.201278	0.940189
	TMEM99	17	38975414	38992522	423	0.510973	0.163691	0.202146	0.940189
	VAPB	20	56964178	57026157	635	0.302126	0.150311	0.20208	0.940189
	VPS53	17	411908	624957	403	0.812152	0.0615272	0.200822	0.940189
	ZNF589	3	48282590	48340743	249	0.0742855	0.548471	0.199127	0.940189
	SULT1C2	2	108905095	108926371	326	0.0886656	0.571645	0.202681	0.940312
	TSEN15	1	184020811	184043346	507	0.29265	0.173308	0.203086	0.941304
	RSU1	10	16632610	16859527	652	0.112115	0.582955	0.203391	0.941829
	AC006262.6	19	46706683	46718094	415	0.12409	0.515202	0.205451	0.943085
	ATRNL1	10	116853124	117708503	288	0.139739	0.522049	0.205134	0.943085
	C1orf229	1	247273462	247275719	475	0.161929	0.242516	0.205364	0.943085
	CAMSAP1	9	138700333	138799074	428	0.302316	0.125269	0.205443	0.943085
	CCDC144CP	17	20224477	20306870	180	0.0944663	0.345019	0.206203	0.943085
	CCDC23	1	43272723	43282954	431	0.122436	0.312561	0.209941	0.943085
	CCT6B	17	33254878	33288528	494	0.272543	0.167293	0.20708	0.943085
	CENPN	16	81040103	81066719	677	0.726192	0.115671	0.211319	0.943085
	COMMD2	3	149456257	149470286	478	0.33008	0.15329	0.208134	0.943085
	EHBP1	2	62900986	63273616	318	0.992818	0.0595104	0.210516	0.943085
	EIF2A	3	150270141	150302029	435	0.247502	0.181434	0.208444	0.943085
	ENTPD3-AS1	3	40355293	40494820	345	0.250143	0.199663	0.205414	0.943085
	FRS3	6	41737914	41747638	509	0.0856625	0.495887	0.207664	0.943085
	HSD17B1P1	17	40698782	40700724	253	0.102181	0.568949	0.2111	0.943085
	IL27RA	19	14142560	14163743	285	0.104918	0.565343	0.206609	0.943085
	KHNYN	14	24899141	24910540	558	0.165013	0.354528	0.211235	0.943085
	43901	5	16067248	16180871	475	0.601454	0.0775687	0.209922	0.943085
	MIR29B1	7	130561495	130598069	393	0.48654	0.0856437	0.210696	0.943085
	MMP27	11	102562218	102576537	518	0.0681953	0.628042	0.205324	0.943085
	MUM1	19	1285890	1378430	420	0.441652	0.0954264	0.20918	0.943085
	NEK5	13	52611093	52703214	332	0.113831	0.610894	0.208503	0.943085
	NSUN6	10	18834581	18940551	590	0.0617316	0.893541	0.210198	0.943085
	PIGN	18	59710800	59854351	511	0.547916	0.0809436	0.207572	0.943085
	PRDM11	11	45115564	45247734	585	0.367369	0.286107	0.208307	0.943085
	PRKAR1B	7	588834	767287	294	0.12909	0.405766	0.207192	0.943085
	PRSS51	8	10340388	10405095	711	0.17999	0.466632	0.204834	0.943085
	RDH13	19	55550476	55582659	459	0.152768	0.362138	0.209114	0.943085
	RP11-107F6.3	15	42062954	42064930	412	0.0676423	0.714881	0.206283	0.943085
	RP11-1407O15.2	17	36351796	36421841	280	0.268093	0.206836	0.206114	0.943085
	RP11-385F5.4	1	236703394	236703746	640	0.059799	0.953184	0.209331	0.943085
	RP4-625H18.2	6	19802395	19804983	546	0.243448	0.264812	0.21014	0.943085
	SEC1P	19	49141402	49184461	462	0.409494	0.20548	0.205936	0.943085
	SMC1B	22	45739944	45809500	577	0.959168	0.0892892	0.204425	0.943085
	ST20	15	80191182	80207598	577	0.108969	0.333911	0.205511	0.943085
	TMC4	19	54663846	54676944	467	0.410285	0.128911	0.210782	0.943085
	TPO	2	1377995	1547483	464	0.084299	0.556885	0.211217	0.943085
	TUBBP1	8	30209389	30211034	355	0.604895	0.0695068	0.207791	0.943085
	USP32P3	17	20318860	20334321	176	0.599614	0.0716696	0.20951	0.943085
	XPO4	13	21351469	21477187	457	0.964179	0.0692851	0.208788	0.943085
	ZNF534	19	52932440	52955568	463	0.838063	0.0669001	0.211106	0.943085
	ZNF195	11	3360491	3400448	412	0.0869554	0.772077	0.211732	0.944076
	AC008174.3	2	186648418	186652936	295	0.268456	0.172894	0.212338	0.945922
	ACAD9	3	128598439	128634910	356	0.0790039	0.594078	0.22198	0.946098
	ARTN	1	44398992	44402913	412	0.63988	0.0820207	0.213269	0.946098
	BAK1	6	33540329	33548019	500	0.0828592	0.581899	0.217689	0.946098
	C14orf144	14	104710541	104712473	358	0.282665	0.168662	0.217326	0.946098
	C1QTNF4	11	47611216	47616211	285	0.173583	0.252156	0.217057	0.946098
	CEACAM21	19	42055886	42093197	318	0.09166	0.942625	0.218922	0.946098
	CHURC1	14	65381079	65411309	493	0.100832	0.420795	0.215969	0.946098
	CNGA3	2	98962618	99015064	297	0.0733694	0.917913	0.218533	0.946098
	COPG2	7	130146134	130353487	420	0.269426	0.228604	0.222397	0.946098
	COX6B1P4	8	26693334	26693817	659	0.082087	0.514108	0.220839	0.946098
	CTC-203F4.2	5	134735313	134736986	516	0.203516	0.265049	0.218735	0.946098
	DANCR	4	53578597	53586247	289	0.637954	0.0830364	0.221085	0.946098
	DCP2	5	112312399	112356667	501	0.0889344	0.490377	0.215645	0.946098
	DCUN1D4	4	52709166	52783003	156	0.417315	0.156165	0.213847	0.946098
	DNAJC18	5	138744279	138780180	257	0.22394	0.202209	0.221999	0.946098
	DOC2B	17	5810	31427	194	0.668728	0.0879832	0.221243	0.946098
	ELAC2	17	12895708	12921504	570	0.0752755	0.631687	0.219975	0.946098
	EPS15	1	51819935	51985000	208	0.070958	0.790551	0.21895	0.946098
	ERCC6	10	50663414	50747584	416	0.777559	0.123565	0.215959	0.946098
	FLVCR1	1	213031597	213072705	414	0.169729	0.44131	0.216919	0.946098
	FRG1B	20	29611857	29634010	91	0.716771	0.0745987	0.219705	0.946098
	G3BP2	4	76567966	76649709	460	0.0694535	0.784317	0.217677	0.946098
	HAGH	16	1845621	1876967	476	0.832734	0.0854627	0.21365	0.946098
	HINT1	5	130494720	130507428	263	0.700336	0.074267	0.217193	0.946098
	HIST2H2BA	1	120906028	120915073	78	0.174853	0.21677	0.221904	0.946098
	KHK	2	27309615	27323465	313	0.53008	0.102848	0.21589	0.946098
	LINC00562	13	48504290	48506757	385	0.415382	0.112639	0.222747	0.946098
	MANBAL	20	35918041	35945663	329	0.118165	0.503428	0.213889	0.946098
	MED10	5	6371994	6378707	647	0.0675557	0.937041	0.222014	0.946098
	MYOC	1	171604557	171621823	540	0.0940759	0.515538	0.218126	0.946098
	NKTR	3	42642106	42690227	474	0.347685	0.15382	0.214287	0.946098
	ODF2	9	131217465	131263571	280	0.144259	0.276672	0.220974	0.946098
	PEX6	6	42931619	42946958	372	0.456502	0.131186	0.221631	0.946098
	RAB3GAP2	1	220321635	220445796	380	0.338796	0.139823	0.216381	0.946098
	RP11-148L24.1	4	175015811	175141549	438	0.973743	0.068202	0.221377	0.946098
	RP11-295K2.3	1	186420213	186420881	367	0.0984124	0.486529	0.222651	0.946098
	RP11-488P3.1	1	94218480	94241000	435	0.126966	0.394438	0.221194	0.946098
	RP11-644N4.1	7	135389285	135389589	464	0.500147	0.161676	0.216461	0.946098
	RPL13	16	89627065	89630950	450	0.0909872	0.744668	0.222202	0.946098
	RPS28	19	8386384	8388198	361	0.128845	0.328526	0.218366	0.946098
	44075	16	30389531	30407312	204	0.173875	0.20501	0.219705	0.946098
	SLMO1	18	12407895	12432237	404	0.0953742	0.420609	0.218908	0.946098
	SPSB2	12	6980113	6998522	208	0.343308	0.133147	0.220188	0.946098
	TAS2R5	7	141490017	141491166	484	0.15964	0.344093	0.21813	0.946098
	TBRG4	7	45139699	45151646	440	0.695878	0.114693	0.214191	0.946098
	TIMM44	19	7991649	8008805	438	0.81779	0.0730003	0.218835	0.946098
	TSNARE1	8	143293441	143484601	444	0.118093	0.41063	0.222444	0.946098
	TSSC2	11	3402191	3430208	411	0.109382	0.790124	0.216849	0.946098
	TTC38	22	46663858	46689905	464	0.0901349	0.710401	0.215527	0.946098
	URM1	9	131133598	131153015	284	0.351575	0.121209	0.215728	0.946098
	USP6	17	5019733	5078329	428	0.179968	0.287161	0.21346	0.946098
	WEE2	7	141408153	141431071	459	0.165041	0.309888	0.216198	0.946098
	ZNF100	19	21905568	21950430	298	0.574526	0.109178	0.21741	0.946098
	ZNF578	19	52956829	53015407	456	0.9675	0.0660649	0.214534	0.946098
	A4GNT	3	137842560	137851229	364	0.414478	0.15782	0.223291	0.946432
	GNB3	12	6949375	6956557	232	0.439497	0.131773	0.223186	0.946432
	RP11-686D22.4	17	33730856	33731392	370	0.0863525	0.576188	0.223594	0.946432
	ZNF814	19	58360099	58400442	473	0.234983	0.33972	0.223508	0.946432
	AVEN	15	34158428	34331377	556	0.44488	0.10854	0.225057	0.948187
	GPR35	2	241544848	241570676	501	0.294329	0.181612	0.225069	0.948187
	LILRA2	19	55084387	55099027	489	0.308615	0.122712	0.225163	0.948187
	LRRC45	17	79981178	79989027	322	0.103158	0.969967	0.224229	0.948187
	RP11-297H3.4	1	170240744	170253349	425	0.134412	0.554708	0.224536	0.948187
	RP11-380O24.1	3	9334272	9397543	546	0.324508	0.211825	0.224709	0.948187
	AC025165.8	12	58005901	58011848	337	0.10334	0.613544	0.227236	0.948241
	ACAN	15	89346674	89418585	454	0.721384	0.0782585	0.227456	0.948241
	ADAT1	16	75630879	75657198	392	0.246364	0.215804	0.225763	0.948241
	B3GNT8	19	41931456	41934635	365	0.172437	0.300672	0.227485	0.948241
	CTB-47B11.3	5	156802749	156811958	507	0.919713	0.0692667	0.227345	0.948241
	LIAS	4	39460620	39479273	375	0.204882	0.209528	0.225392	0.948241
	MILR1	17	62461569	62464760	226	0.443797	0.0980899	0.226597	0.948241
	RP11-1212A22.1	16	18428257	18446333	160	0.710634	0.117818	0.227404	0.948241
	RP11-17E13.2	1	75164453	75165017	377	0.609646	0.135563	0.226472	0.948241
	RP11-305L7.6	9	93881344	93945044	561	0.241002	0.144176	0.227399	0.948241
	RP11-983P16.4	12	53408380	53447358	554	0.681148	0.140646	0.22578	0.948241
	VNN2	6	133065009	133084598	541	0.585705	0.0797568	0.227066	0.948241
	FCF1P2	3	48332283	48332865	255	0.0865572	0.539359	0.227717	0.948261
	LILRA4	19	54844456	54850421	451	0.428266	0.100123	0.227875	0.948261
	RP11-408A13.4	9	14588795	14590063	708	0.422059	0.121675	0.228343	0.949405
	EPHX2	8	27348296	27403081	641	0.823491	0.106504	0.229564	0.949906
	POC1B	12	89813495	89919801	355	0.847095	0.0786773	0.229631	0.949906
	PSMG2	18	12665064	12725739	372	0.241763	0.166341	0.228701	0.949906
	RP11-292F22.7	10	47656084	47657233	56	0.170674	0.365943	0.229452	0.949906
	RP11-295H24.3	15	49657321	49658882	337	0.1163	0.499003	0.229457	0.949906
	RPL21P10	14	78149545	78150332	629	0.0898525	0.872166	0.230006	0.949906
	TIPIN	15	66628544	66679084	520	0.454903	0.118263	0.229996	0.949906
	TRANK1	3	36868311	36986548	392	0.126896	0.340411	0.229389	0.949906
	MAGOH2	17	10619319	10619828	500	0.124057	0.392385	0.230491	0.951115
	PLCD3	17	43186385	43210721	285	0.914585	0.0695828	0.230786	0.951532
	DYNLT1	6	159057506	159065771	494	0.175008	0.221032	0.231656	0.953626
	RP11-861E21.1	18	12432896	12437634	409	0.080164	0.638698	0.23168	0.953626
	C4orf32	4	113066553	113116412	393	0.0722108	0.839712	0.23196	0.953979
	STK31	7	23749786	23872132	441	0.110363	0.982823	0.23293	0.95637
	ZNF114	19	48675575	48790865	513	0.418859	0.118843	0.232889	0.95637
	FAM170A	5	118965254	118971517	376	0.28945	0.331882	0.233312	0.957141
	AC005013.5	7	28998566	28998961	687	0.0891113	0.852638	0.234908	0.957313
	ACP2	11	47260853	47270457	297	0.84839	0.0952983	0.234829	0.957313
	CEBPZ	2	37428755	37458773	486	0.0814973	0.763152	0.234473	0.957313
	COL21A1	6	55921388	56258892	424	0.731612	0.0944799	0.234469	0.957313
	HLA-J	6	29975174	29977733	41	0.301242	0.216196	0.234651	0.957313
	KRR1	12	75890684	75905401	522	0.44411	0.147102	0.23447	0.957313
	RP11-45P15.4	14	103798011	103798704	357	0.29628	0.275539	0.234485	0.957313
	TLR6	4	38825336	38845412	518	0.101278	0.620764	0.234838	0.957313
	NMT1	17	43129030	43186334	331	0.412828	0.187909	0.235437	0.95812
	RBP7	1	10057264	10076078	303	0.0691572	0.956552	0.235495	0.95812
	ADPRHL1	13	114076260	114107839	380	0.202546	0.356795	0.236352	0.959415
	C2CD2	21	43305221	43373999	790	0.101471	0.949583	0.236592	0.959415
	KCTD19	16	67323403	67360666	238	0.14187	0.264132	0.236225	0.959415
	MED13	17	60019966	60142643	249	0.759635	0.0783602	0.236399	0.959415
	ADAT2	6	143743969	143771810	515	0.0781105	0.878817	0.237425	0.960039
	FRRS1L	9	111892573	111929571	597	0.198249	0.195986	0.237064	0.960039
	GOLGA8H	15	30896329	30906764	180	0.175468	0.324445	0.237612	0.960039
	NEK3	13	52706775	52733996	340	0.418266	0.173463	0.237204	0.960039
	RP11-151D14.1	9	75486644	75489025	413	0.0894149	0.81095	0.23772	0.960039
	MRPS33	7	140705854	140715028	400	0.885031	0.0735203	0.238158	0.96102
	AC004985.12	7	44001189	44012924	364	0.249977	0.285104	0.257825	0.961641
	AC010536.1	16	87727144	87729753	494	0.980951	0.101152	0.257571	0.961641
	ACBD4	17	43209967	43221548	285	0.983743	0.0734758	0.244948	0.961641
	ADCK3	1	227085237	227175246	492	0.0952274	0.639483	0.2402	0.961641
	AGAP8	10	51224681	51252947	187	0.567041	0.166465	0.24694	0.961641
	AK4	1	65613232	65697828	446	0.130504	0.425397	0.258878	0.961641
	AKAP11	13	42846289	42897396	519	0.112592	0.996477	0.263433	0.961641
	APITD1	1	10490840	10502866	387	0.543629	0.108705	0.259796	0.961641
	C10orf32	10	104613980	104624718	344	0.16253	0.488457	0.260549	0.961641
	C10orf88	10	124690419	124713896	568	0.0821049	0.761684	0.254522	0.961641
	C12orf49	12	117153593	117175875	440	0.599922	0.0929014	0.254894	0.961641
	C12orf52	12	113623331	113630173	491	0.299526	0.217372	0.261104	0.961641
	C1orf85	1	156259880	156265463	394	0.321484	0.363701	0.247599	0.961641
	C9orf9	9	135753414	135765588	562	0.187025	0.696967	0.263744	0.961641
	CAMKK2	12	121675497	121736111	400	0.30557	0.222018	0.263134	0.961641
	CASC3	17	38296576	38328436	308	0.0773366	0.83137	0.243406	0.961641
	CBR3	21	37507210	37518864	502	0.823226	0.0789515	0.252026	0.961641
	CCDC13	3	42749761	42814696	451	0.221719	0.312943	0.245509	0.961641
	CCL24	7	75440983	75452674	291	0.133594	0.70273	0.241365	0.961641
	CCNT2	2	135675805	135716912	372	0.751024	0.0882995	0.253867	0.961641
	CD53	1	111415775	111442550	595	0.777986	0.0781589	0.241936	0.961641
	CHRFAM7A	15	30653443	30686052	135	0.112442	0.484137	0.242269	0.961641
	CLEC4M	19	7828035	7834491	418	0.770685	0.0997753	0.258637	0.961641
	CNPY4	7	99717236	99723134	279	0.103909	0.528708	0.261616	0.961641
	CRELD2	22	50311815	50321188	429	0.225349	0.18293	0.254528	0.961641
	CSGALNACT1	8	19261672	19615540	673	0.458681	0.140988	0.241975	0.961641
	CTD-3199J23.6	17	41297131	41297272	288	0.131218	0.682115	0.257232	0.961641
	CTSF	11	66330934	66336312	256	0.178231	0.36958	0.258786	0.961641
	DDX60L	4	169277886	169458937	528	0.376178	0.168546	0.245459	0.961641
	DNAH10OS	12	124410971	124419531	428	0.65418	0.113652	0.24115	0.961641
	DND1P1	17	43663237	43664295	120	0.746538	0.090378	0.26251	0.961641
	DTX2P1	7	76607934	76645172	251	0.118086	0.755009	0.253349	0.961641
	EHD4	15	42190950	42264776	433	0.125744	0.526969	0.241184	0.961641
	ELP3	8	27947190	28048673	570	0.979233	0.118718	0.255088	0.961641
	FAHD1	16	1877196	1890208	476	0.848448	0.0969555	0.260351	0.961641
	FAM118A	22	45704849	45737836	615	0.62185	0.149737	0.248213	0.961641
	FAM160A1	4	152330368	152584784	308	0.101748	0.736297	0.258194	0.961641
	FAM160B1	10	116581503	116659591	375	0.818674	0.0842453	0.252098	0.961641
	FARP2	2	242295658	242431094	373	0.842609	0.108967	0.247433	0.961641
	GDF9	5	132196873	132202238	411	0.146524	0.316846	0.251093	0.961641
	GFPT1	2	69546905	69614382	416	0.0953558	0.884808	0.259471	0.961641
	GK5	3	141882414	141944449	325	0.347775	0.22787	0.253837	0.961641
	GLYATL2	11	58601542	58671688	349	0.980148	0.119391	0.263719	0.961641
	GMPPB	3	49759317	49761384	318	0.100267	0.500316	0.250734	0.961641
	GPATCH8	17	42474784	42580798	380	0.191105	0.224887	0.264195	0.961641
	GUSBP1	5	21341942	21589481	261	0.281805	0.239931	0.26039	0.961641
	HLA-AS1	1	221006105	221006534	396	0.356228	0.278471	0.259001	0.961641
	HOXD-AS1	2	177037923	177053268	455	0.177987	0.419745	0.25629	0.961641
	HOXD1	2	177053307	177055688	455	0.164038	0.306758	0.255871	0.961641
	ITPKC	19	41223008	41246760	430	0.146848	0.451264	0.259043	0.961641
	KDM2B	12	121866900	122018696	399	0.0998586	0.62951	0.255351	0.961641
	KMT2A	11	118307205	118397539	461	0.159714	0.59722	0.260971	0.961641
	LAMA4	6	112429963	112576141	451	0.149282	0.855189	0.263525	0.961641
	LINC01088	4	79892902	80229952	332	0.914834	0.0984277	0.259328	0.961641
	LRRC37A4P	17	43578685	43627701	138	0.544141	0.103829	0.258767	0.961641
	LYRM2	6	90277863	90348472	492	0.14037	0.384205	0.260291	0.961641
	MAP3K2	2	128056306	128146041	440	0.2563	0.178613	0.242141	0.961641
	MAT2B	5	162930120	162946342	465	0.650539	0.140277	0.254882	0.961641
	MCTP1	5	94039446	94620279	438	0.267051	0.177865	0.263768	0.961641
	MED28	4	17616254	17635728	419	0.121984	0.557377	0.244957	0.961641
	MUT	6	49398073	49430904	347	0.118659	0.397959	0.258248	0.961641
	MYO3A	10	26223196	26501456	528	0.976839	0.0813436	0.261763	0.961641
	MYO5A	15	52599480	52821247	441	0.0831934	0.852294	0.247891	0.961641
	MYRFL	12	70219084	70352877	549	0.120603	0.985848	0.251687	0.961641
	NBR2	17	41277627	41305688	284	0.126028	0.686169	0.247854	0.961641
	NELL2	12	44902058	45315631	344	0.243203	0.240192	0.263228	0.961641
	NNT-AS1	5	43571696	43603228	253	0.674068	0.128742	0.264071	0.961641
	NOC3L	10	96075085	96122716	332	0.551435	0.132624	0.252458	0.961641
	NUP85	17	73201754	73231853	379	0.62653	0.138233	0.262141	0.961641
	OS9	12	58087738	58115340	357	0.62279	0.115045	0.263143	0.961641
	PARP2	14	20811845	20826064	624	0.332453	0.358197	0.264262	0.961641
	PCBP3	21	47063608	47362368	489	0.249877	0.168651	0.251013	0.961641
	PDHB	3	58413357	58419584	433	0.692582	0.107963	0.249358	0.961641
	PHOSPHO2	2	170550975	170558218	467	0.123543	0.413638	0.26097	0.961641
	PTTG1IP	21	46269500	46293752	568	0.0867263	0.859578	0.26251	0.961641
	RABGAP1L	1	174128548	174964445	278	0.256306	0.162605	0.241517	0.961641
	RABGGTB	1	76252384	76260764	461	0.144222	0.722013	0.252713	0.961641
	RBM6	3	49977440	50114683	340	0.13379	0.576169	0.239193	0.961641
	RHOT1	17	30469733	30580393	310	0.104654	0.768637	0.24447	0.961641
	RNU6ATAC35P	1	220998962	220999389	405	0.159902	0.412535	0.257535	0.961641
	ROCK1P1	18	109065	122219	310	0.22517	0.308704	0.249337	0.961641
	RP1-1J6.2	20	39726978	39766643	407	0.616978	0.147041	0.264271	0.961641
	RP1-313I6.12	6	28046570	28048752	485	0.278017	0.264273	0.249578	0.961641
	RP11-137H2.6	10	82194765	82196869	551	0.0815352	0.755953	0.248986	0.961641
	RP11-158M2.5	15	86298172	86299468	563	0.795713	0.0880991	0.254724	0.961641
	RP11-218F10.3	4	164450923	164451849	399	0.136538	0.311197	0.240712	0.961641
	RP11-256L6.3	12	96390299	96405267	556	0.494301	0.13178	0.245038	0.961641
	RP11-383J24.6	8	125318430	125320617	540	0.786452	0.117599	0.247591	0.961641
	RP11-572M11.3	3	112861197	112886666	467	0.124243	0.384302	0.254262	0.961641
	RP11-61L23.2	7	143339348	143534026	258	0.925609	0.0896501	0.258416	0.961641
	RP11-63E9.1	6	141768148	141772143	270	0.161246	0.453317	0.262907	0.961641
	RP11-672A2.4	11	76365213	76367756	478	0.245651	0.267484	0.260926	0.961641
	RP11-80I15.1	9	97885803	97886150	360	0.142752	0.770061	0.245282	0.961641
	RP11-958N24.1	16	15005408	15029565	103	0.103977	0.536811	0.251612	0.961641
	RP13-685P2.7	3	129064254	129065007	298	0.0866378	0.865131	0.259089	0.961641
	RP4-635E18.7	1	11128528	11133154	363	0.966278	0.099543	0.244303	0.961641
	RP5-1142J19.1	7	157074230	157075380	443	0.619837	0.137834	0.263463	0.961641
	RPL18A	19	17970685	17974962	427	0.0981229	0.65519	0.244375	0.961641
	RPL9	4	39455744	39460568	375	0.162072	0.317428	0.255396	0.961641
	S1PR2	19	10334520	10335623	375	0.30377	0.205399	0.262992	0.961641
	SFXN2	10	104474295	104503249	365	0.451345	0.14153	0.247341	0.961641
	SIGLEC16	19	50472857	50479071	339	0.145321	0.497569	0.262663	0.961641
	SLC14A1	18	43304092	43332485	551	0.0773859	0.97477	0.248336	0.961641
	SLC25A51	9	37879491	37904350	528	0.361064	0.168418	0.249236	0.961641
	SMDT1	22	42475695	42480288	343	0.347455	0.157395	0.251782	0.961641
	SMG5	1	156219015	156252620	394	0.141909	0.415462	0.245468	0.961641
	SNHG15	7	45022622	45026560	435	0.902041	0.127291	0.253132	0.961641
	SPATA20	17	48623667	48633213	467	0.917406	0.0874013	0.254386	0.961641
	SPC25	2	169690642	169769881	571	0.161262	0.347407	0.260221	0.961641
	SYPL2	1	110009180	110024759	426	0.212463	0.272789	0.252874	0.961641
	TCF7L1	2	85360533	85537511	412	0.0940027	0.844136	0.258472	0.961641
	TCTE3	6	170140210	170151655	477	0.518707	0.107747	0.245479	0.961641
	TIMM10	11	57295936	57298276	377	0.0870661	0.792497	0.26287	0.961641
	TM6SF2	19	19375175	19384200	359	0.306089	0.145985	0.257085	0.961641
	TM9SF3	10	98277866	98347209	472	0.106489	0.625484	0.241676	0.961641
	TMEM91	19	41856816	41889988	375	0.172368	0.474647	0.248185	0.961641
	TNKS2	10	93558069	93625033	305	0.0856221	0.836475	0.262982	0.961641
	TPCN2	11	68816365	68858072	428	0.226094	0.199213	0.251492	0.961641
	TTC27	2	32853099	33046118	426	0.628723	0.103382	0.256779	0.961641
	WDFY3-AS2	4	85887545	85932430	345	0.133692	0.526543	0.252595	0.961641
	WDR73	15	85185999	85197574	376	0.72449	0.136092	0.246962	0.961641
	ZNF112	19	44830708	44871377	449	0.150035	0.455112	0.253886	0.961641
	ZNF117	7	64432154	64451186	257	0.471636	0.1322	0.248957	0.961641
	ZNF192P1	6	28129559	28137372	470	0.298385	0.178891	0.244122	0.961641
	ZNF202	11	123594885	123612383	607	0.501347	0.138776	0.243391	0.961641
	ZNF302	19	35168552	35177302	414	0.120654	0.511109	0.240073	0.961641
	ZNF404	19	44376515	44388203	461	0.850097	0.0841749	0.25364	0.961641
	ZNF425	7	148799876	148823438	374	0.37977	0.218023	0.261329	0.961641
	ZNF518B	4	10441498	10459032	634	0.103836	0.863906	0.253772	0.961641
	ZNF565	19	36673188	36737159	330	0.15702	0.681948	0.252318	0.961641
	ZNF669	1	247263264	247267674	476	0.212981	0.245138	0.246703	0.961641
	ZNF677	19	53731577	53758151	477	0.742399	0.0887485	0.239843	0.961641
	ZNF713	7	55955205	56009918	321	0.703916	0.0989388	0.25732	0.961641
	COX16	14	70791798	70826448	568	0.121345	0.520317	0.26529	0.961798
	NAV2	11	19372271	20143144	575	0.381317	0.13268	0.26511	0.961798
	RP11-11N5.1	4	187812123	187813520	496	0.0980027	0.66621	0.264988	0.961798
	URAHP	16	90106169	90114181	258	0.122214	0.499011	0.265027	0.961798
	ZNF720	16	31724550	31806190	207	0.127414	0.949771	0.265247	0.961798
	ACTN4	19	39138310	39222223	411	0.674312	0.162064	0.268284	0.962269
	AGXT	2	241807896	241818537	487	0.229505	0.295984	0.267065	0.962269
	CDH8	16	61681146	62070939	367	0.522458	0.112118	0.26661	0.962269
	COL6A1	21	47401651	47424964	471	0.834102	0.0957714	0.270301	0.962269
	DCLK2	4	150999426	151178609	392	0.398661	0.121831	0.265899	0.962269
	DUSP18	22	31048038	31063587	450	0.168783	0.47869	0.272011	0.962269
	FAM124B	2	225243415	225266802	442	0.219678	0.244156	0.265961	0.962269
	FAM220A	7	6369040	6388612	298	0.0892352	0.747288	0.270014	0.962269
	FPR3	19	52298416	52329442	607	0.108347	0.58519	0.271877	0.962269
	LENG8	19	54960224	54972980	459	0.335617	0.163422	0.272697	0.962269
	LRRCC1	8	86019382	86058311	261	0.302909	0.212109	0.270618	0.962269
	MKLN1-AS2	7	130994503	131012981	494	0.797137	0.117835	0.268918	0.962269
	MRPS7	17	73257886	73262308	377	0.739116	0.127146	0.26909	0.962269
	MTHFR	1	11845780	11866977	483	0.841444	0.104946	0.267995	0.962269
	MYOM2	8	1993155	2113475	681	0.220021	0.243623	0.2705	0.962269
	NAGA	22	42454461	42466846	341	0.726503	0.104891	0.273623	0.962269
	NBPF1	1	16888814	16940057	276	0.0951051	0.672157	0.271669	0.962269
	NDUFA3	19	54606036	54612564	455	0.299479	0.315789	0.267122	0.962269
	NIT1	1	161087902	161095235	401	0.304725	0.221681	0.267934	0.962269
	NT5C2	10	104850368	104953056	348	0.123057	0.876344	0.269559	0.962269
	PYROXD2	10	100143322	100174941	494	0.251282	0.220817	0.268228	0.962269
	RAPGEF6	5	130759614	130970929	291	0.306383	0.161872	0.271929	0.962269
	RNF150	4	141780961	142134031	363	0.08433	0.936798	0.273388	0.962269
	RP11-15A1.3	19	44395956	44405957	466	0.972619	0.0830333	0.27169	0.962269
	RP11-181K3.4	1	183107537	183110417	445	0.20178	0.224276	0.273531	0.962269
	RP11-368I7.4	16	89749028	89752977	420	0.234619	0.365214	0.272516	0.962269
	RP11-372K14.2	4	152061143	152062255	268	0.73418	0.100349	0.273474	0.962269
	RP11-488L18.3	1	247347115	247348784	467	0.482546	0.151836	0.267129	0.962269
	RP13-578N3.3	4	144660128	144786225	259	0.190292	0.289227	0.269614	0.962269
	RP4-758J18.7	1	1357849	1358071	293	0.147371	0.642736	0.269468	0.962269
	RP5-968P14.2	1	27018623	27020622	327	0.335477	0.137702	0.266583	0.962269
	SCO1	17	10583654	10601692	500	0.184642	0.305492	0.26786	0.962269
	SF3B3	16	70557691	70608820	159	0.782645	0.127373	0.271324	0.962269
	SYCE1L	16	77240338	77246902	735	0.0967709	0.790526	0.268213	0.962269
	TAS2R10	12	10977916	10978957	390	0.30339	0.198012	0.272703	0.962269
	THEM6	8	143808621	143818345	406	0.178984	0.329016	0.270809	0.962269
	TMEM132A	11	60691935	60704555	408	0.182422	0.524305	0.272808	0.962269
	TMEM41B	11	9302201	9336327	375	0.734184	0.113758	0.273421	0.962269
	TRAF1	9	123664671	123691451	348	0.887098	0.0850776	0.271126	0.962269
	TTC5	14	20724717	20773888	611	0.376848	0.349055	0.268631	0.962269
	UBAC1	9	138824815	138853226	437	0.239731	0.211987	0.268318	0.962269
	WASF5P	6	31255287	31256741	207	0.0961429	0.803253	0.270458	0.962269
	AC011526.1	19	41960074	42006559	343	0.116431	0.894972	0.276388	0.962601
	ANTXR2	4	80822303	81046608	377	0.135942	0.453127	0.274073	0.962601
	DDX25	11	125773271	125793005	559	0.141021	0.394935	0.274564	0.962601
	DLGAP2	8	1449532	1656642	670	0.4999	0.131834	0.27544	0.962601
	DNAJC3	13	96329393	96447243	508	0.990613	0.115572	0.275873	0.962601
	DPT	1	168664697	168698502	583	0.569406	0.104317	0.274959	0.962601
	FAM3C	7	120988905	121036418	369	0.996406	0.0843823	0.276	0.962601
	NSA2	5	74064756	74072737	476	0.181417	0.319556	0.276843	0.962601
	PTPRCAP	11	67202981	67205518	242	0.645022	0.135405	0.274257	0.962601
	RP11-1055B8.4	17	79361930	79364056	362	0.108879	0.60882	0.275622	0.962601
	RP11-592B15.4	10	51345753	51364771	126	0.881981	0.143103	0.276783	0.962601
	RP11-616M22.5	16	1307340	1308059	447	0.84667	0.128264	0.275912	0.962601
	SARS2	19	39405906	39421187	396	0.190538	0.290893	0.274794	0.962601
	SNORD89	2	101889399	101889511	408	0.132121	0.623453	0.276772	0.962601
	TMEM97	17	26646121	26655351	268	0.152902	0.420744	0.276233	0.962601
	TRIM8	10	104404253	104418164	361	0.969806	0.0917479	0.276588	0.962601
	MAMDC2-AS1	9	72700732	72790804	430	0.198563	0.25355	0.277351	0.963436
	RN7SKP16	1	33802167	33802465	443	0.137732	0.658363	0.277474	0.963436
	AC008746.12	19	54949847	54950362	457	0.36211	0.154466	0.280008	0.964547
	AKAP13	15	85923802	86292586	580	0.236197	0.199946	0.279475	0.964547
	AP001007.1	11	124959132	124960411	485	0.189655	0.300478	0.278867	0.964547
	COA1	7	43648055	43769316	411	0.922351	0.107008	0.279713	0.964547
	CWF19L1	10	101992055	102027437	401	0.764858	0.106372	0.280126	0.964547
	KLKB1	4	187147592	187179625	570	0.210939	0.417584	0.279745	0.964547
	LGALS7	19	39261611	39264132	407	0.266986	0.238343	0.279842	0.964547
	PRPF6	20	62612488	62664453	375	0.0992868	0.750337	0.278597	0.964547
	RP11-511B23.2	12	93398290	93609455	385	0.207511	0.703085	0.279596	0.964547
	TOP3A	17	18174742	18218321	279	0.106422	0.95936	0.279744	0.964547
	TTC23	15	99676528	99791428	545	0.301936	0.220005	0.27981	0.964547
	ZDBF2	2	207139387	207179148	432	0.0868473	0.925413	0.280144	0.964547
	ADH1B	4	100226121	100242558	497	0.0859542	0.997764	0.282276	0.965361
	ALG12	22	50293877	50312106	428	0.515164	0.125766	0.284048	0.965361
	AP000473.8	21	18015848	18017384	386	0.357878	0.314645	0.283771	0.965361
	ATP6V0E2-AS1	7	149564786	149568885	259	0.237574	0.306177	0.283962	0.965361
	BLVRA	7	43798279	43846939	402	0.349679	0.207151	0.283479	0.965361
	CTD-2516F10.2	11	7448497	7533746	663	0.109266	0.884686	0.280984	0.965361
	FRRS1	1	100174259	100231349	467	0.535925	0.117122	0.281858	0.965361
	GOLGA6L4	15	84904525	84914120	250	0.868193	0.0927456	0.281341	0.965361
	HSD17B4	5	118788138	118878028	355	0.11963	0.843753	0.283049	0.965361
	NAPG	18	10525902	10552757	676	0.678794	0.124622	0.282592	0.965361
	PDC	1	186412698	186430254	367	0.145466	0.366237	0.282974	0.965361
	RP11-108M9.5	1	17215590	17216042	339	0.0891082	0.965016	0.28095	0.965361
	RP11-244O19.1	9	124577953	124581731	469	0.606002	0.152077	0.284299	0.965361
	RP11-417E7.2	6	169575401	169582835	629	0.306179	0.256206	0.283372	0.965361
	RPS9	19	54704610	54752862	480	0.842881	0.0918133	0.283366	0.965361
	ST3GAL6-AS1	3	98433174	98451495	398	0.888616	0.135242	0.281831	0.965361
	TRIM13	13	50570024	50592587	407	0.799151	0.0984168	0.28428	0.965361
	UGT2B7	4	69917081	69978705	186	0.143978	0.757049	0.283664	0.965361
	WASH2P	2	114341664	114356605	361	0.390009	0.144857	0.28328	0.965361
	ZNF66	19	20959110	20991922	243	0.270897	0.22574	0.283235	0.965361
	CTC-297N7.1	17	10561859	10562399	525	0.705553	0.127392	0.284702	0.966066
	MED28P3	2	187229325	187229855	294	0.418372	0.210737	0.284933	0.966152
	RPH3AL	17	62293	236045	290	0.50129	0.128926	0.28512	0.966152
	ABCA7	19	1040102	1065568	474	0.843388	0.126492	0.302411	0.96864
	ABRACL	6	139349819	139364439	472	0.184675	0.66279	0.305202	0.96864
	AC007966.1	2	186584601	186605206	294	0.554583	0.155521	0.305474	0.96864
	AC099048.1	3	30030355	30031951	496	0.291007	0.336096	0.29845	0.96864
	AC112229.7	2	111132715	111140688	142	0.506017	0.263972	0.300951	0.96864
	AC139100.3	18	77941563	77960875	224	0.0916597	0.97144	0.294954	0.96864
	AL161915.1	1	54569968	54571750	477	0.515969	0.18115	0.294653	0.96864
	ALOX5	10	45869661	45941561	348	0.167279	0.709217	0.29077	0.96864
	APTX	9	32972604	33025166	479	0.636272	0.182254	0.301499	0.96864
	ATF4	22	39915700	39918691	396	0.172342	0.543547	0.297386	0.96864
	ATP11B	3	182511288	182639027	360	0.30092	0.218445	0.29175	0.96864
	ATP6V1E2	2	46717889	46769696	672	0.110765	0.960215	0.294985	0.96864
	ATRIP	3	48488114	48506444	256	0.724835	0.10907	0.290839	0.96864
	CABLES2	20	60963688	60982341	487	0.271621	0.29216	0.298513	0.96864
	CALHM2	10	105206543	105212602	357	0.825919	0.115253	0.293109	0.96864
	CAPN12	19	39224343	39260544	407	0.987722	0.123519	0.291801	0.96864
	CCNB1IP1	14	20779527	20801471	617	0.324781	0.371373	0.296694	0.96864
	CENPW	6	126661320	126670021	185	0.504894	0.126702	0.298369	0.96864
	CHD1L	1	146714291	146767443	407	0.193864	0.642741	0.288537	0.96864
	CLHC1	2	55401927	55459490	506	0.375271	0.215262	0.304791	0.96864
	CLUHP3	16	31711911	31721097	209	0.472626	0.313474	0.305919	0.96864
	CPE	4	166282346	166419472	449	0.270885	0.345515	0.298755	0.96864
	CRYZ	1	75171170	75198835	383	0.665253	0.144336	0.288051	0.96864
	CTA-217C2.1	22	45528901	45559662	659	0.733885	0.14174	0.29762	0.96864
	CTD-2336O2.1	8	1710156	1712668	733	0.154616	0.413347	0.29019	0.96864
	CTD-2368P22.1	19	58513429	58522600	453	0.353584	0.197174	0.292388	0.96864
	DDRGK1	20	3170996	3185331	437	0.62334	0.120742	0.29497	0.96864
	DLX3	17	48067369	48072588	423	0.882438	0.122931	0.304017	0.96864
	ENKD1	16	67696848	67700667	235	0.845383	0.112558	0.290152	0.96864
	FAM21A	10	51827648	51893269	262	0.245269	0.3014	0.304876	0.96864
	FBXW8	12	117348761	117468953	456	0.230769	0.242585	0.304226	0.96864
	FCER2	19	7753644	7767032	396	0.436462	0.155666	0.287801	0.96864
	FN3KRP	17	80674559	80688204	367	0.103282	0.78266	0.298648	0.96864
	FNTB	14	65453438	65529316	474	0.406616	0.169432	0.301531	0.96864
	GGA3	17	73232694	73257754	377	0.717071	0.137718	0.295811	0.96864
	GSTM4	1	110198703	110208118	458	0.784037	0.12098	0.297179	0.96864
	GUSBP5	4	144480625	144570458	258	0.239778	0.227665	0.304624	0.96864
	HSD17B1	17	40701232	40707231	252	0.138798	0.58882	0.300954	0.96864
	IGHV4-39	14	106877619	106878126	58	0.621096	0.14002	0.300614	0.96864
	INCENP	11	61891445	61920635	456	0.167198	0.383237	0.293298	0.96864
	IRF7	11	612553	615999	465	0.426201	0.170212	0.290339	0.96864
	KANSL1	17	44107282	44302733	46	0.146583	0.87791	0.297236	0.96864
	KNOP1	16	19714902	19729016	450	0.161964	0.406521	0.307005	0.96864
	KRT83	12	52708085	52715182	800	0.952848	0.139487	0.299836	0.96864
	LEMD2	6	33738979	33756913	539	0.265568	0.246173	0.286585	0.96864
	LINC00638	14	105287538	105290055	360	0.191023	0.330802	0.295071	0.96864
	LINC00933	15	85114155	85123406	359	0.145225	0.459116	0.289834	0.96864
	43898	10	45950035	46090354	228	0.277123	0.300428	0.301471	0.96864
	MBL1P	10	81664654	81710092	308	0.137464	0.532385	0.292075	0.96864
	MED21	12	27175479	27219276	525	0.113736	0.686242	0.306391	0.96864
	MESDC2	15	81239667	81282219	463	0.0995768	0.848228	0.290964	0.96864
	MLLT10P1	20	29637799	29638060	100	0.137747	0.40091	0.289117	0.96864
	MS4A7	11	60145955	60163424	457	0.911417	0.0971081	0.298768	0.96864
	MTMR11	1	149900543	149908791	139	0.168417	0.753645	0.299129	0.96864
	MYBPHL	1	109834987	109849663	447	0.23735	0.260483	0.29214	0.96864
	NBR1	17	41322498	41363708	291	0.158786	0.702836	0.299846	0.96864
	NICN1	3	49460959	49466759	288	0.208862	0.322444	0.300363	0.96864
	NOXA1	9	140317802	140328815	360	0.524839	0.130153	0.28919	0.96864
	NPIPA2	16	14841923	14859270	147	0.461667	0.165987	0.291256	0.96864
	NUTM2G	9	99690592	99702535	252	0.170035	0.361743	0.300144	0.96864
	PDK2	17	48172101	48187403	437	0.85526	0.117862	0.29413	0.96864
	PET112	4	152591656	152682175	392	0.12656	0.823555	0.294024	0.96864
	PFKM	12	48498922	48540187	518	0.145278	0.851832	0.288938	0.96864
	PHF10	6	170110332	170124151	489	0.174164	0.342927	0.298145	0.96864
	PLA2G4C	19	48551100	48614074	519	0.371651	0.195944	0.296685	0.96864
	POLR3H	22	41921808	41940610	304	0.113828	0.953572	0.293129	0.96864
	PPM1G	2	27604061	27632554	301	0.128726	0.633589	0.305542	0.96864
	PREPL	2	44543420	44589001	459	0.670446	0.119198	0.296389	0.96864
	PSMB1	6	170844205	170862429	267	0.303235	0.279647	0.306724	0.96864
	PSMC3	11	47440320	47447993	288	0.352999	0.221119	0.293761	0.96864
	RACGAP1	12	50370706	50426919	327	0.113603	0.614396	0.292651	0.96864
	RIT1	1	155867599	155881195	282	0.55036	0.134927	0.30217	0.96864
	ROR2	9	94325373	94712444	480	0.380106	0.20446	0.3041	0.96864
	RP11-151A6.4	13	101187995	101232371	499	0.168851	0.716595	0.304911	0.96864
	RP11-250B2.6	6	81065141	81066576	440	0.133599	0.64143	0.296352	0.96864
	RP11-341N2.1	2	243029505	243030608	90	0.130843	0.565637	0.305949	0.96864
	RP11-47I22.3	14	62037372	62125414	492	0.123721	0.986207	0.296439	0.96864
	RP11-593F23.1	15	76467232	76473827	279	0.310851	0.189444	0.302157	0.96864
	RP11-661A12.9	8	144655660	144659438	359	0.146452	0.910519	0.306296	0.96864
	RP11-767N6.2	1	46116711	46117498	288	0.957822	0.0988988	0.302842	0.96864
	RP11-80H8.4	3	142842204	142850735	548	0.65614	0.186582	0.292252	0.96864
	RP11-848G14.5	5	68927790	68932312	125	0.573556	0.131947	0.302349	0.96864
	SLC22A15	1	116519119	116612675	476	0.367417	0.155966	0.295455	0.96864
	SLC38A11	2	165752696	165812035	404	0.592499	0.114509	0.292394	0.96864
	SLFN5	17	33570055	33600674	378	0.244289	0.330161	0.291638	0.96864
	SMIM2-AS1	13	44716682	44722166	490	0.140225	0.710358	0.307087	0.96864
	SND1	7	127292234	127732659	459	0.458722	0.189639	0.286907	0.96864
	SNORA31	13	45910449	45910582	440	0.171104	0.299426	0.286612	0.96864
	SNX19	11	130745331	130786404	642	0.144698	0.471794	0.305942	0.96864
	SNX32	11	65601112	65621172	350	0.679425	0.176727	0.30649	0.96864
	SPATA6	1	48761044	48937845	464	0.292421	0.287091	0.304179	0.96864
	SSPN	12	26287897	26452223	577	0.600024	0.198348	0.304696	0.96864
	STRN4	19	47222764	47250251	339	0.127064	0.493092	0.301294	0.96864
	TAS2R12	12	11047542	11048481	368	0.639778	0.161587	0.30538	0.96864
	TGFB1	19	41807610	41859816	377	0.178654	0.416707	0.291532	0.96864
	TMEM178B	7	140774032	141180180	391	0.818577	0.102304	0.301978	0.96864
	TMEM230	20	5080486	5093749	609	0.113793	0.921598	0.297839	0.96864
	TMEM231	16	75572015	75590184	384	0.329153	0.258748	0.294752	0.96864
	TMTC4	13	101256181	101327347	558	0.128797	0.959674	0.300981	0.96864
	TYW3	1	75199093	75232362	383	0.836293	0.130508	0.29564	0.96864
	UCP2	11	73685712	73694352	372	0.159324	0.676151	0.303132	0.96864
	USMG5	10	105148823	105156223	350	0.735882	0.120484	0.290877	0.96864
	WDR18	19	983174	994569	468	0.399545	0.22683	0.302704	0.96864
	ZDHHC7	16	85007787	85045141	655	0.412384	0.20214	0.292553	0.96864
	ZKSCAN3	6	28317691	28336947	385	0.25706	0.462989	0.304344	0.96864
	ZNF143	11	9482069	9550071	398	0.870706	0.105065	0.306824	0.96864
	ZNF280D	15	56922379	57210769	348	0.753718	0.124105	0.301104	0.96864
[truncated: 3,366 more rows]

## Sheet: SupplTable3.4
	Supplementary Table 3.4 Interactions between genes and premenopausal body mass index
[truncated: 4,888 more rows]

[truncated: 10 more sheets: SupplTable3.5, SupplTable3.6, SupplTable3.7, SupplTable3.8, SupplTable3.9, SupplTable3.10, SupplTable3.11, SupplTable3.12, SupplTable3.13, SupplTable3.14]
